# Supplementary material
Source: PubMed Central journal article supplement (PMC8387463)
Supplement: mmc1.pdf [file mmc1.pdf]

## Supplemental information

### Targeted long-read sequencing identifies missing disease-causing variation

Danny E. Miller, Arvis Sulovari, Tianyun Wang, Hailey Loucks, Kendra Hoekzema, Katherine M. Munson, Alexandra P. Lewis, Edith P. Almanza Fuerte, Catherine R. Paschal, Tom Walsh, Jenny Thies, James T. Bennett, Ian Glass, Katrina M. Dipple, Karynne Patterson, Emily S. Bonkowski, Zoe Nelson, Audrey Squire, Megan Sikes, Erika Beckman, Robin L. Bennett, Dawn Earl, Winston Lee, Rando Allikmets, Seth J. Perlman, Penny Chow, Anne V. Hing, Tara L. Wenger, Margaret P. Adam, Angela Sun, Christina Lam, Irene Chang, Xue Zou, Stephanie L. Austin, Erin Huggins, Alexias Safi, Apoorva K. Iyengar, Timothy E. Reddy, William H. Majoros, Andrew S. Allen, Gregory E. Crawford, Priya S. Kishnani, University of Washington Center for Mendelian Genomics, Mary-Claire King, Tim Cherry, Jessica X. Chong, Michael J. Bamshad, Deborah A. Nickerson, Heather C. Mefford, Dan Doherty, and Evan E. Eichler

## Supplemental Data

|                                                                                                                                 |    |
|---------------------------------------------------------------------------------------------------------------------------------|----|
| Supplemental Text                                                                                                               | 4  |
| Clinical summary and prior testing for simple structural variant cases                                                          | 4  |
| Clinical summary and prior testing for cases that underwent phasing                                                             | 4  |
| Clinical summary and prior testing for repeat expansion cases                                                                   | 4  |
| Clinical summary and prior testing for complex structural variant cases                                                         | 5  |
| Clinical summary and prior testing for missing variant cases                                                                    | 5  |
| Supplementary Figures                                                                                                           | 7  |
| Figure S1. Binary segmentation figures.                                                                                         | 7  |
| Figure S2. BK144-03, known 22q13.3 deletion.                                                                                    | 19 |
| Figure S3. BK180-03, known 15q11-q13 duplication.                                                                               | 22 |
| Figure S4. BK294-03, known 22q11.2 duplication.                                                                                 | 23 |
| Figure S5. BK364-03, known 1p36.11 duplication.                                                                                 | 24 |
| Figure S6. BK397-101, known 16p11.2 deletion.                                                                                   | 26 |
| Figure S7. BK430-103, known 16p11.2 duplication.                                                                                | 26 |
| Figure S8. BK482-101, known 1q21.1 duplication.                                                                                 | 27 |
| Figure S9. BK487-101, known 1q21 deletion.                                                                                      | 27 |
| Figure S10. BK506-03, known 5p15.33 deletion.                                                                                   | 28 |
| Figure S11. S016, known tandem duplication within <i>CTNND2</i> .                                                               | 32 |
| Figure S12. S023, mosaic ring 18 present in 40% of cells.                                                                       | 34 |
| Figure S13. S046, known unbalanced translocation between chromosomes 4 and 15.                                                  | 35 |
| Figure S14. S060, known translocation between chromosomes 12 and 17 thought to affect <i>SOX9</i> .                             | 37 |
| Figure S15. S063, known SVA insertion in <i>BRCAl</i> .                                                                         | 39 |
| Figure S16. S011 ( <i>ATXN3</i> and <i>ATXN8OS</i> ), evaluation of repeat length in an individual.                             | 40 |
| Figure S17. S039 ( <i>FMRI</i> ), evaluation of repeat length and methylation status.                                           | 41 |
| Figure S18. S040 ( <i>FXN</i> ), known repeat expansion.                                                                        | 42 |
| Figure S19. S041 ( <i>FXN</i> ), known repeat expansion.                                                                        | 43 |
| Figure S20. 04-01, 04-02, and 04-03 ( <i>XYLTI</i> ), evaluation of repeat length in family 04 from LaCroix <i>et al.</i> 2019. | 44 |
| Figure S21. 06-01, 06-02, and 06-03 ( <i>XYLTI</i> ), evaluation of repeat length in family 06 from LaCroix <i>et al.</i> 2019. | 47 |
| Figure S22. S071, Phasing of inherited and <i>de novo</i> variants in <i>METTL5</i> .                                           | 48 |
| Figure S23. S086, Phasing of known inherited and <i>de novo</i> mosaic variant in <i>KIAA1109</i> .                             | 49 |
| Figure S24. S014, three noncontiguous deletions of chromosome 6 identified by CMA.                                              | 50 |
| Figure S25. S020, individual with three deletions identified on array and multiple rearrangements on karyotype.                 | 58 |

|                                                                                                                                   |     |
|-----------------------------------------------------------------------------------------------------------------------------------|-----|
| Figure S26. S021, mosaic loss of 8p and mosaic gain of 8q.                                                                        | 88  |
| Figure S27. S022, focal amplification of 4q with adjacent region of homozygosity, duplication of 15q11.2.                         | 91  |
| Figure S28. S035, duplications of 8q24 and 16p13.11 identified by clinical testing.                                               | 95  |
| Figure S29. S036, individual with multiple rearrangements and translocations of chromosomes 5, 6, 10, and 18.                     | 98  |
| Figure S30. S082, individual with deletion of <i>RBM20</i> and duplication involving <i>RAI1</i> and <i>PMP22</i> .               | 117 |
| Figure S31. S083, individual with terminal deletion and proximal duplication of chromosome 4.                                     | 121 |
| Figure S32. S002 ( <i>ALMS1</i> ), IGV views of known inherited stop variant and <i>Alu</i> insertion.                            | 123 |
| Figure S33. S003 ( <i>NPHP4</i> ), IGV views of inherited stop, splice variant, and data showing variant does affect splicing.    | 124 |
| Figure S34. S004 ( <i>VAR2</i> ), IGV view of known inherited variant.                                                            | 128 |
| Figure S35. S008 ( <i>HPRT1</i> ), view of inversion and FISH results.                                                            | 129 |
| Figure S36. S009 ( <i>DMD</i> ), IGV view of AGAA expansion and frequency in SSC samples.                                         | 130 |
| Figure S37. S013 ( <i>HPS1</i> ), IGV view of inherited variant and deletion identified by LRS.                                   | 132 |
| Figure S38. S018 ( <i>PAH</i> ), known inherited splice variant identified, no second variant found.                              | 134 |
| Figure S39. S025 ( <i>ABCA4</i> ), the previously known variant and a 1,500 bp insertion can be phased into different haplotypes. | 135 |
| Figure S40. S047 ( <i>AGL</i> ), known single-nucleotide deletion, second hit is 1.5 kbp deletion.                                | 139 |
| Figure S41. S056 ( <i>WDR19</i> ), IGV views of inherited and splice variants identified by LRS.                                  | 141 |
| Supplementary Tables                                                                                                              | 142 |
| Table S1: Sample summary, DNA source, flow cells and libraries used per sample.                                                   | 142 |
| Table S2: Per sample sequencing targets, coverage, and average read length.                                                       | 143 |
| Table S3: Overview of individuals with a known single structural variant.                                                         | 144 |
| Table S4: Overview of individuals with repeat expansions, including expected and observed repeat expansion sizes.                 | 145 |
| Table S5: Per-read details of individuals with <i>ATXN3</i> , <i>ATXN8OS</i> , <i>FMRI</i> , and <i>FXN</i> repeat expansions.    | 146 |
| Table S6: Per-read details of <i>XYLT1</i> repeat expansions.                                                                     | 147 |
| Table S7: Summary of individuals with complex SVs, including previously known events and new events identified by T-LRS.          | 148 |
| Table S8: Known and new events observed for individuals with known complex SVs.                                                   | 148 |
| Table S9: Details of focal amplification of 4q in individual S022.                                                                | 149 |
| Table S10: Rearrangement numbers and sizes for individual S014.                                                                   | 149 |
| Table S11: Genes impacted by S014 breakpoints.                                                                                    | 149 |
| Table S12: Rearrangement numbers and sizes for individual S020.                                                                   | 150 |
| Table S13: Genes impacted by S020 breakpoints.                                                                                    | 151 |
| Table S14: Rearrangement numbers and sizes for individual S036.                                                                   | 152 |

|                                                                                                                                                                                                              |     |
|--------------------------------------------------------------------------------------------------------------------------------------------------------------------------------------------------------------|-----|
| Table S15: Genes impacted by S036 breakpoints.                                                                                                                                                               | 152 |
| Table S16: Summary of individuals with missing variants.                                                                                                                                                     | 153 |
| Table S17: Reads used to calculate length of AGAA motif in individual S009.                                                                                                                                  | 154 |
| Table S18: Predicted strength of the canonical splice donor site at the Exon 1–Intron 1 boundary of <i>ABCA4</i> (NM_000350) and alternative sites introduced by the ~1,500 bp insertion in individual S025. | 155 |
| Table S19: Accession numbers or contact information for original sequencing data.                                                                                                                            | 156 |
| Supplemental References                                                                                                                                                                                      | 157 |

## Supplemental Text

### Clinical summary and prior testing for simple structural variant cases

All nine cases beginning with “BK” are from the Study of Autism Genetics Exploration (SAGE) collection, five cases of which have been previously described<sup>5</sup> and four (BK397-101, BK430-103, BK482-101, BK487-101) are samples collected after the publication.

Individual S016 has a known duplication in *CTNND2* confirmed by clinical mate-pair sequencing to be tandem.<sup>1</sup>

Individual S023 presented with developmental delay, epilepsy, and hypothyroidism. A SNP array identified a mosaic region of 18p11.32 and 18q21.31q23 with copy number between 1 and 2. Evaluation of chromosomes revealed that this individual was mosaic for a ring chromosome 18 in ~40% of cells.

Individual S046 presented with developmental delay and was found to have an unbalanced translocation between chromosomes 4 and 15. A single-nucleotide polymorphism (SNP) array identified a copy state of 1 at 4q35.1q35.2 and a copy state of 3 at 15q26.1q26.3.

Individual S060 was diagnosed with campomelic dysplasia, vertebral anomalies, neurogenic bowel and bladder, and bilateral moderate conductive hearing loss. Karyotype revealed 46,XY,t(12;17)(q13.3;q25). Because of high suspicion for campomelic dysplasia associated with a *SOX9* variant sequencing of *SOX9* was undertaken which was negative. SNP microarray was used in an attempt to localize the translocation breakpoints if they were associated with a deletion or duplication but was unrevealing.

Individual S063 was from a family with severe bilateral breast and ovarian cancer in which clinical evaluation failed to identify a pathogenic variant in either *BRCA1* or *BRCA2*. Long-read sequencing on a PacBio platform after CRISPR-Cas9 excision of *BRCA1* and *BRCA2* revealed a SINE-VNTR-Alu retrotransposon insertion that created a pseudoexon in *BRCA1*.

### Clinical summary and prior testing for cases that underwent phasing

Individual S071 was referred to genetics for global developmental delay. Trio exome sequencing revealed two variants of uncertain clinical significance, one a *de novo* variant, in *METTL5* that could not be phased.

Individual S086 carried a diagnosis of epilepsy. Panel testing on an exome backbone revealed an inherited pathogenic variant in *KIAA1109* and a *de novo* mosaic variant. These variants could not be phased by the clinical laboratory.

### Clinical summary and prior testing for repeat expansion cases

Individual S011 was an individual with clinically confirmed expansions in *ATXN3* (74 and 28 repeats) and *ATXN8OS* (80 and 25 repeats). Individual 04-01 (proband), 04-02 (mother), 04-03 (father), 06-01 (proband), 06-02 (mother), and 06-03 (father) were previously described.<sup>3</sup>

### Clinical summary and prior testing for complex structural variant cases

Individual S014 presented prenatally with agenesis of the corpus callosum and ventriculomegaly. At birth the child was noted to have mild dysmorphic features and pelviectasis without hydronephrosis. A SNP array identified a complex pathogenic heterozygous deletion within 6q25.2 to 6q25.3, which included *ARID1B* and perhaps explained most of his clinical findings.

Individual S020 presented with hypotonia, developmental delay, epilepsy, and dysmorphic features. A SNP array revealed deletions of 4q13.2q13.3, 4q13.3, and 14q11.2. Karyotyping identified rearrangements among chromosomes 2, 14, 10, and 4 that involved the deleted regions and also 2p23, 2p25, 10q21.2, 10q21.1, and 10q22.3.

Individual S021 presented with developmental delay and was found by microarray and karyotype to be mosaic for complex changes to chromosome 8 that included loss of 8p23.2–pter (copy number 1), mosaic loss of a segment within 8p23.2–8p23.1 (copy number 1–2), and mosaic gain of 8q22.1–qter (copy number 2–3). Karyotype identified one cell line with a derivative chromosome 8 that consists of a terminal duplication of 8q, from 8q22.1 to qter, and a terminal deletion of 8p, from 8p23.2 to pter. The duplicated region of 8q is present on distal 8p, such that 8q22.1 to qter is present at both ends of the derivative chromosome 8. The other cell line has a terminal deletion of 8p, from 8p23.1 to pter.

Individual S022 presented with hemihypertrophy of unclear etiology. A standard Beckwith-Wiedemann workup including *CDKN1C* sequencing and deletion/duplication analysis was unremarkable. A SNP array identified a focal amplification of 4q with the copy state reported as more than 4 with an adjacent 27.5 Mbp region of homozygosity on 4q. A SNP array also identified a duplication of 15q11.2. Metaphase and interphase FISH confirmed that the focal amplification of 4q was more than 4.

Individual S035 presented with developmental delay and was found on array to have duplications of both 8q24.3 and 16p13.11.

Individual S036 underwent genetic testing for expressive language delay, microcephaly, and mild dysmorphic features. A SNP array revealed four noncontiguous deletions of chromosome 10 at 10p12.2p12.1, 10p11.21, and 10q21.1 (two deletions in this interval). Karyotype revealed a translocation between chromosomes 6 and 18 at 6q22.2 and 18p11.2 as well as a pericentric inversion of chromosome 10 at 10p11.2q11.2.

Individual S082 was referred for genetic testing because of gross motor delay and multiple congenital anomalies. SNP array revealed two pathogenic CNVs, a 10q25.2 deletion involving *RBM20*, and a complex chromosome 17 duplication and deletion involving *RAI1* and *PMP22*.

Individual S083 was prenatally diagnosed with multiple congenital anomalies, including imperforate anus and vertebral anomalies. SNP array after birth revealed a 4p16.3 deletion and 4p16.3p15.2 duplication. The deletion overlaps the Wolf-Hirschhorn syndrome critical region.

### Clinical summary and prior testing for missing variant cases

Individual S002 presented with early-onset obesity, type 2 diabetes, cone-rod dystrophy, and sensorineural hearing loss. Clinical testing by SNP array was unremarkable and exome sequencing identified a single paternally inherited stop-gain variant in *ALMS1*, the gene associated with Alström syndrome, a recessive disorder that fit the phenotype well. Subsequent exon-level array revealed no deletions or duplications in the gene.

Individual S003 was an individual with renal failure, retinal degeneration, and essential tremor. A SNP array was unremarkable, trio exome revealed a single variant in *NPHP4*, and deletion/duplication analysis of *NPHP4* was unremarkable. Clinical RNA testing was sent, which was interpreted as indeterminate.

Individual S004 presented with agenesis of the corpus callosum, microcephaly, poor growth, lactic acidosis, and global developmental delay. The SNP array was unremarkable, trio exome sequencing revealed a single pathogenic variant in *VARS2*, and deletion/duplication analysis of the gene was unremarkable.

Individual S008 was an individual with biochemically confirmed Lesch-Nyhan syndrome. Clinical testing included karyotype and sequencing of exons on an exome backbone, both of which were unremarkable.

Individual S009 presented with concern for Duchenne muscular dystrophy due to a family history of the disease. The proband's maternal uncle passed away at age 29 from the disease without a molecular diagnosis. Molecular testing in the proband included SNP array, targeted exon sequencing, and deletion/duplication analysis, all of which were unremarkable. Analysis of muscle biopsy by immunohistochemistry revealed staining indicative of a dystrophinopathy, but dystrophin 1 antibody staining (rod domain) was more than classically seen in Duchenne type dystrophy.

Individual S013 presented with oculocutaneous albinism and platelet dysfunction, suggesting Hermansky-Pudlak syndrome, but SNP array and exome sequencing only identified a single paternally inherited stop in *HPS1*, one of several genes associated with this recessive disorder.

Individual S018 presented with elevated phenylalanine consistent with phenylketonuria. Panel testing revealed a single pathogenic variant in *PAH*.

Individual S025 presented in their early twenties with disease characteristics in the macula of both eyes consistent with recessive Stargardt disease. No other systemic issues or family history was reported. Research sequencing revealed a single inherited pathogenic variant and research whole-genome short-read sequencing failed to identify a second hit. After identification of a 1,500 bp insertion in the first intron of *ABCA4* with LRS visual reanalysis of the short-read data confirmed an 11 bp target site duplication at the same position.

Individual S047 presented at 18 months old with failure to thrive, marked hepatomegaly, and fasting hypoglycemia. A liver biopsy was performed revealing increasing glycogen content, decreased glucose-1-phosphate to glucose ratio, and no measurable debranching enzyme. A diagnosis of Glycogen Storage Disease Type IIIa was suspected. Sequencing of the *AGL* gene revealed a single heterozygous frameshift variant in exon 10 resulting in a premature stop codon (c.1276delG, p.Ile437X) on one allele. A second variant was not identified.

Individual S056 presented with end-stage renal disease related to nephronophthisis, rhizomelic/metaphyseal skeletal dysplasia, retinal dystrophy, developmental delays, hyperparathyroidism, and hepatic fibrosis. A ciliopathy gene panel revealed a single heterozygous pathogenic variant in *WDR19* and deletion/duplication analysis of the gene was unremarkable.

## Supplementary Figures

### Figure S1. Binary segmentation figures.

To complement existing SV callers and independently guide the refinement of CNV breakpoints, we applied the binary segmentation method to the sequencing depth profiles of each CNV region. The coordinates of each region were further refined through visual validation. Due to the sensitivity of the binary segmentation method to duplicated genomic sequences, 6 of the 29 regions could not have their breakpoints refined by this method; these were refined using a combination of existing SV callers and visual refinement of sequencing depth profile. The script used to generate these images as well as the coverage for each target region is available on GitHub.

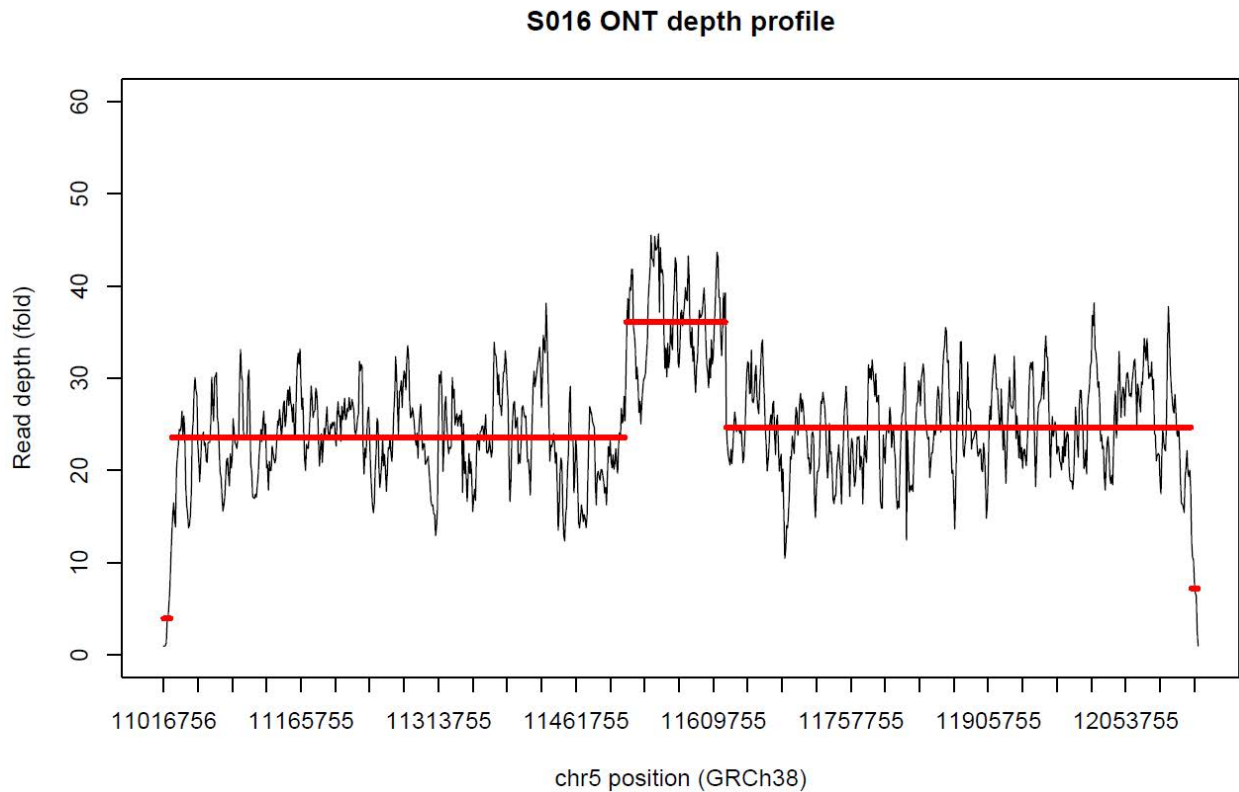



**BK364 ONT depth profile**

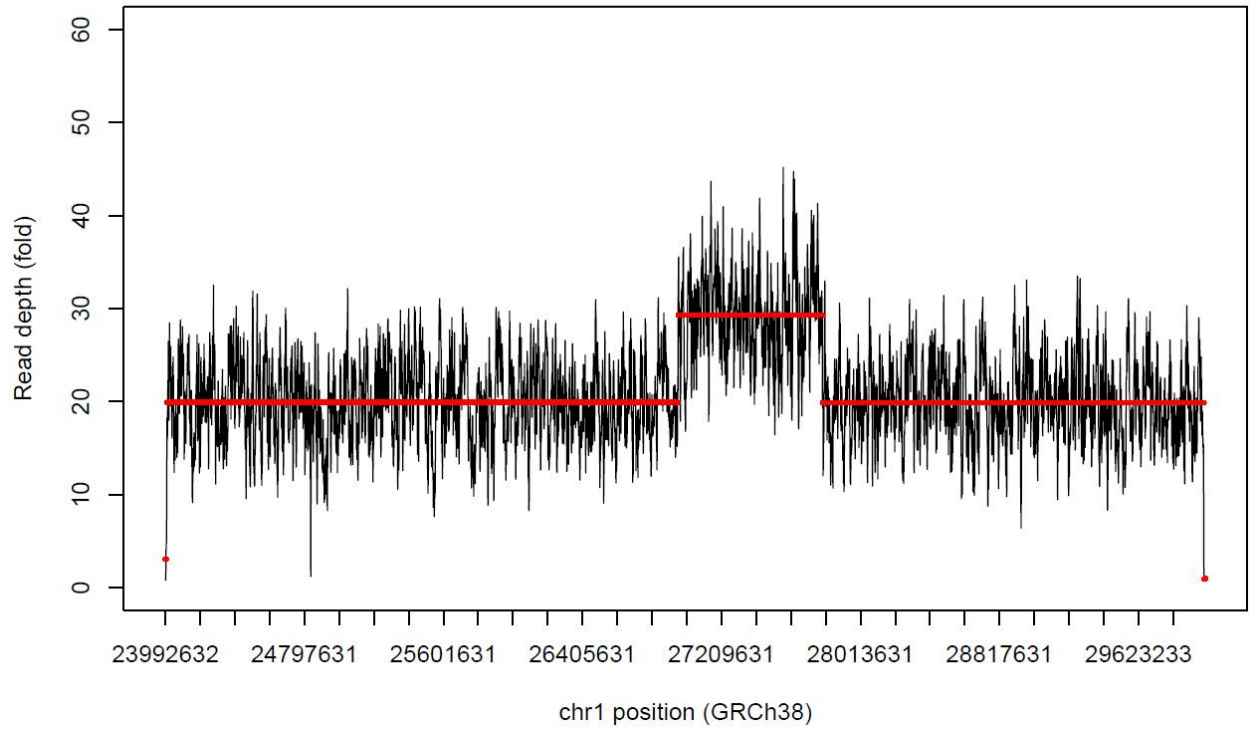

**BK144 ONT depth profile**

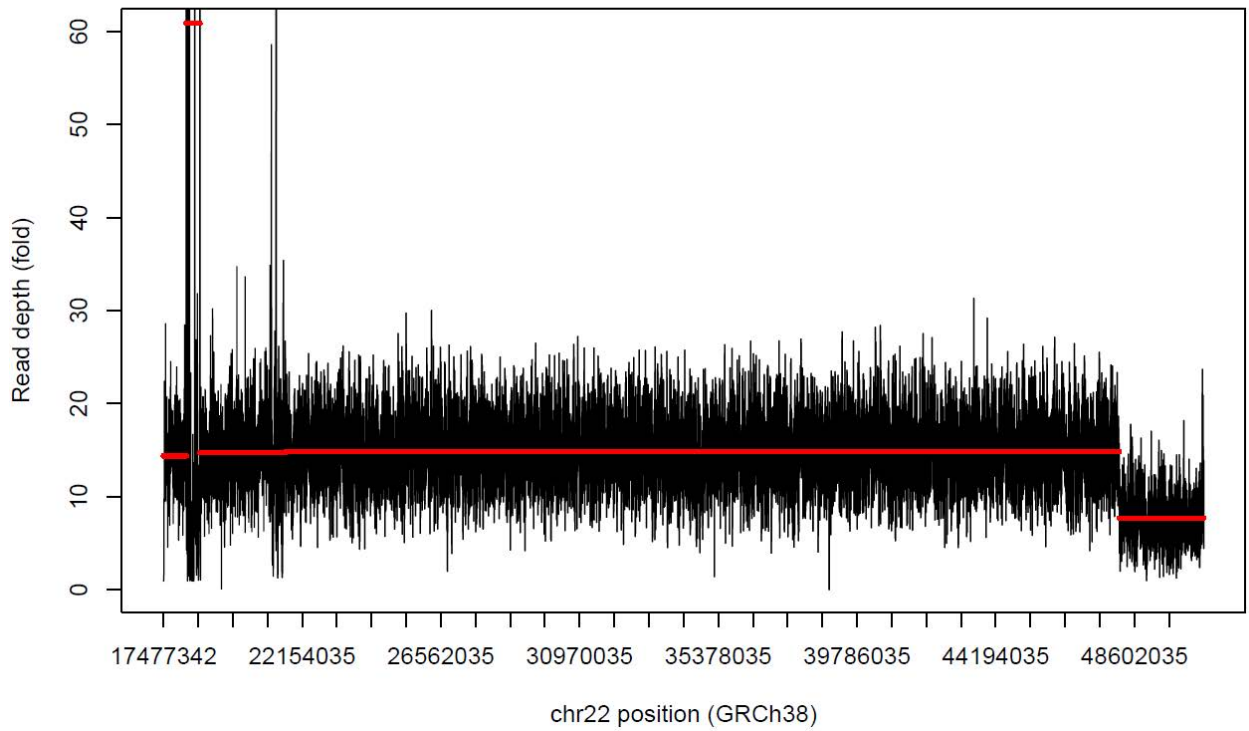

**BK397 ONT depth profile**

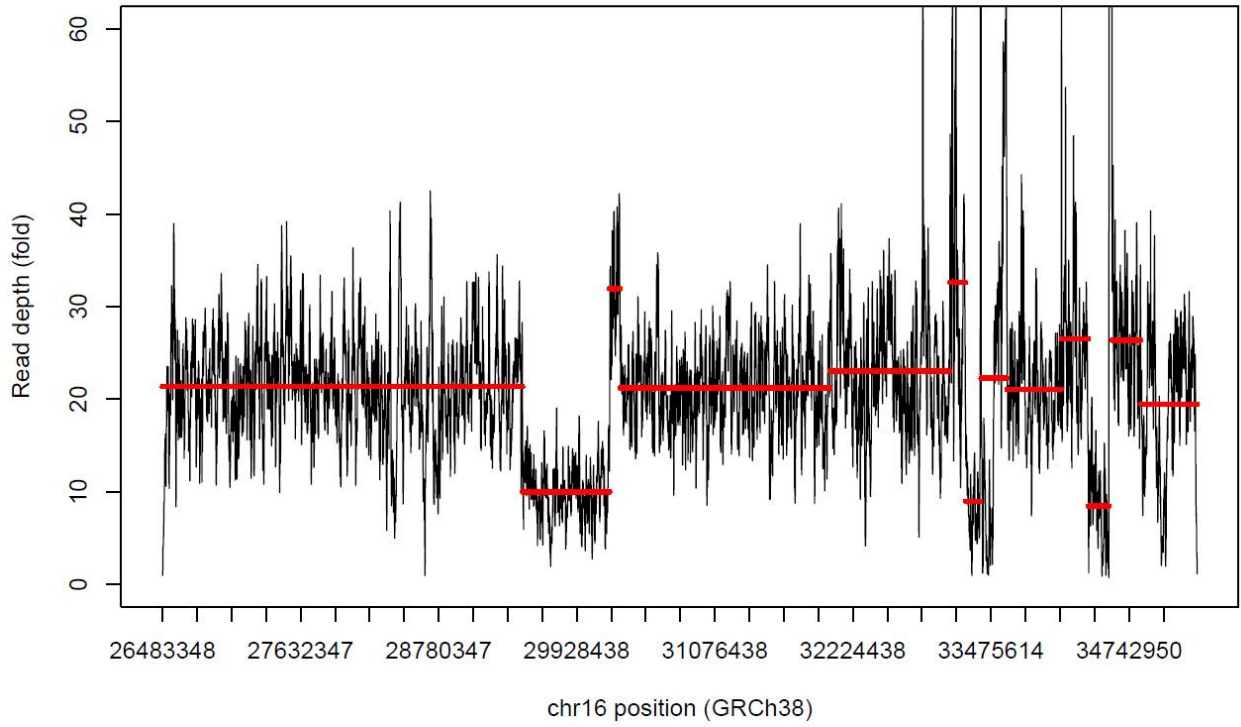

**BK430 ONT depth profile**

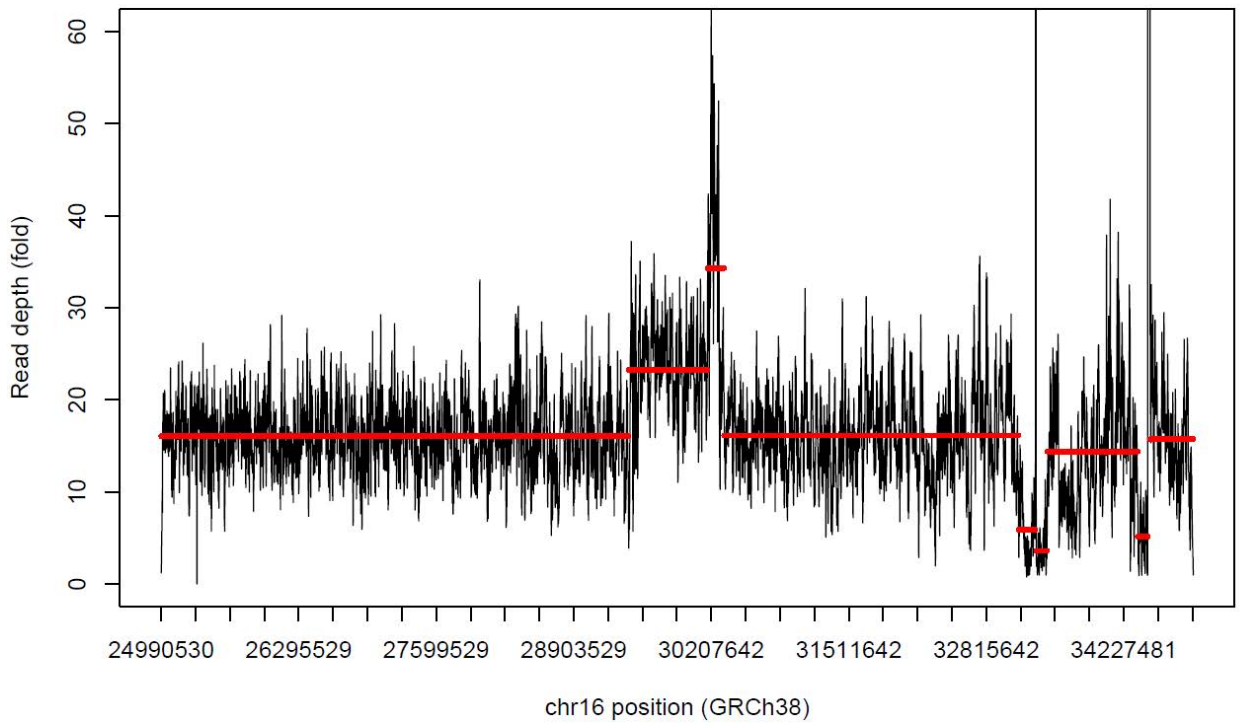

**BK506 ONT depth profile**

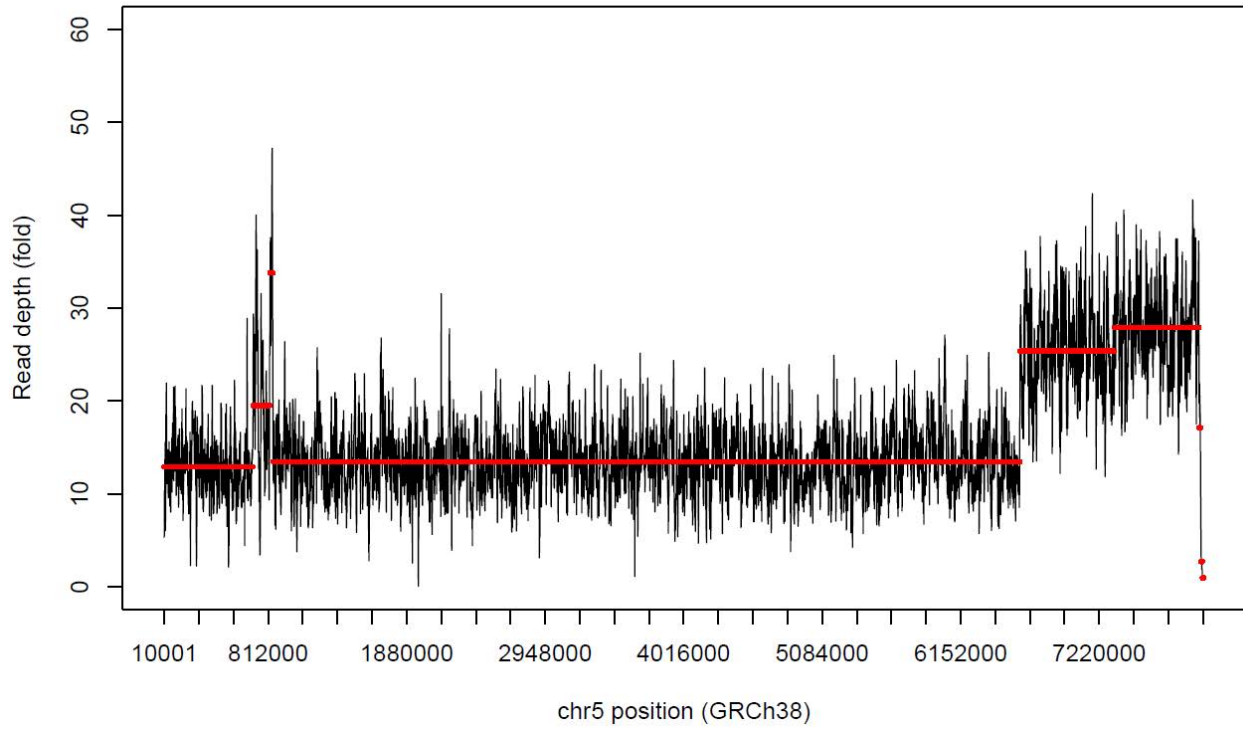

**BK294 ONT depth profile**

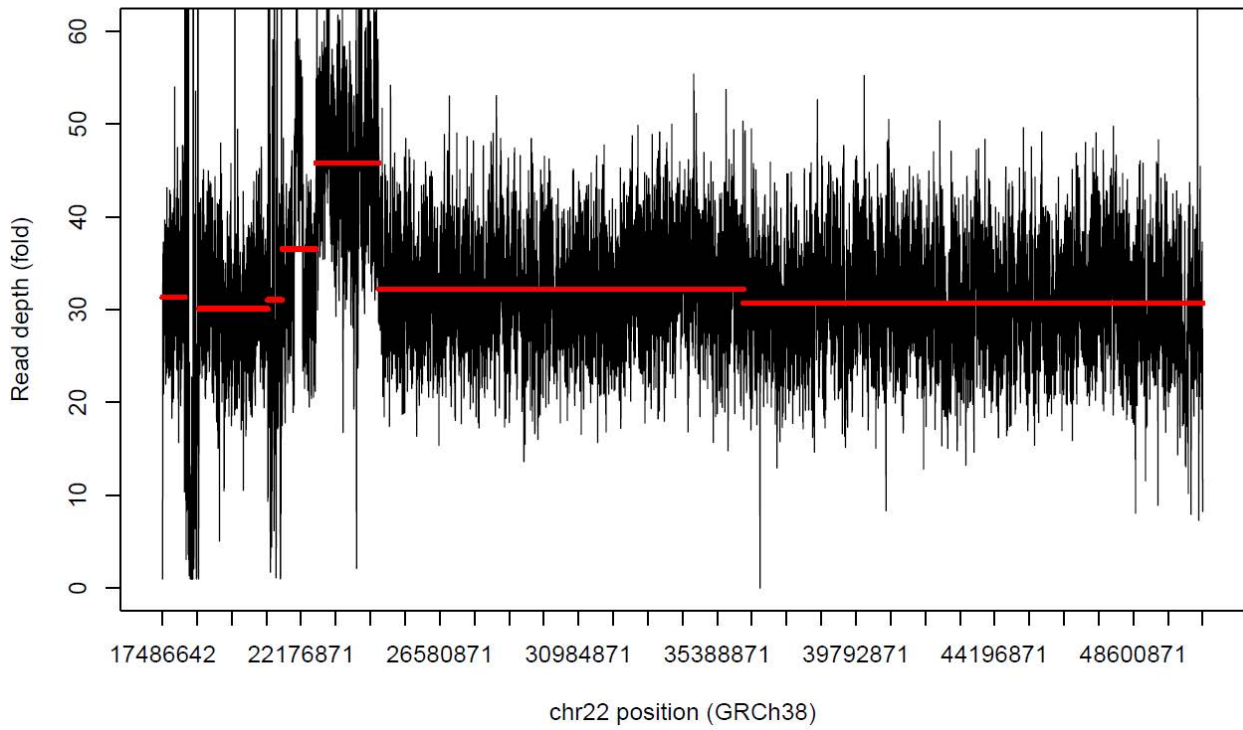

**BK482 ONT depth profile**

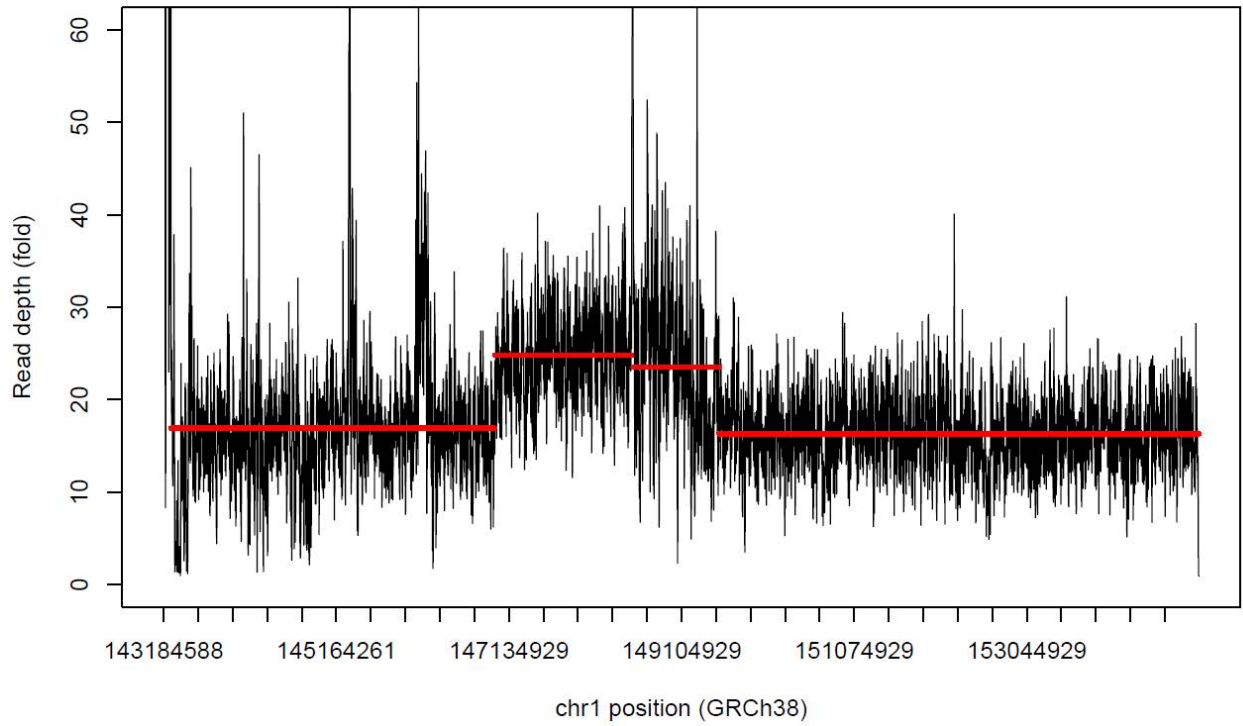

**BK487 ONT depth profile**

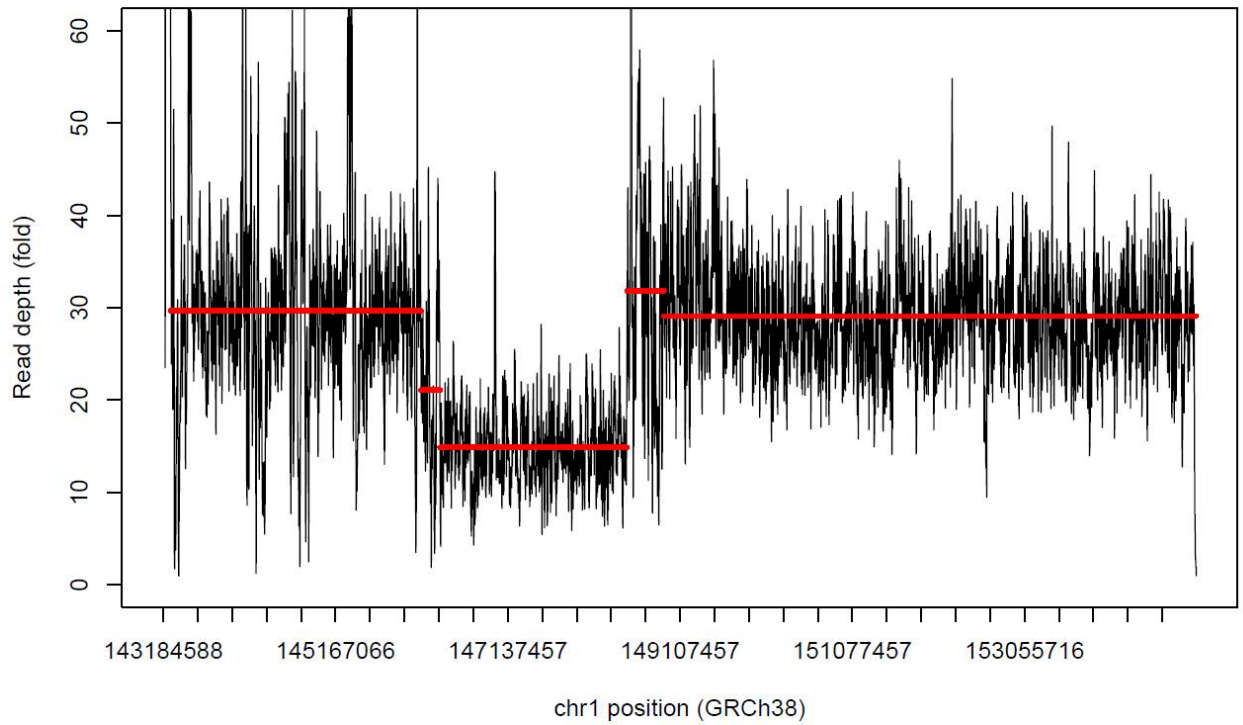

**BK180 ONT depth profile**

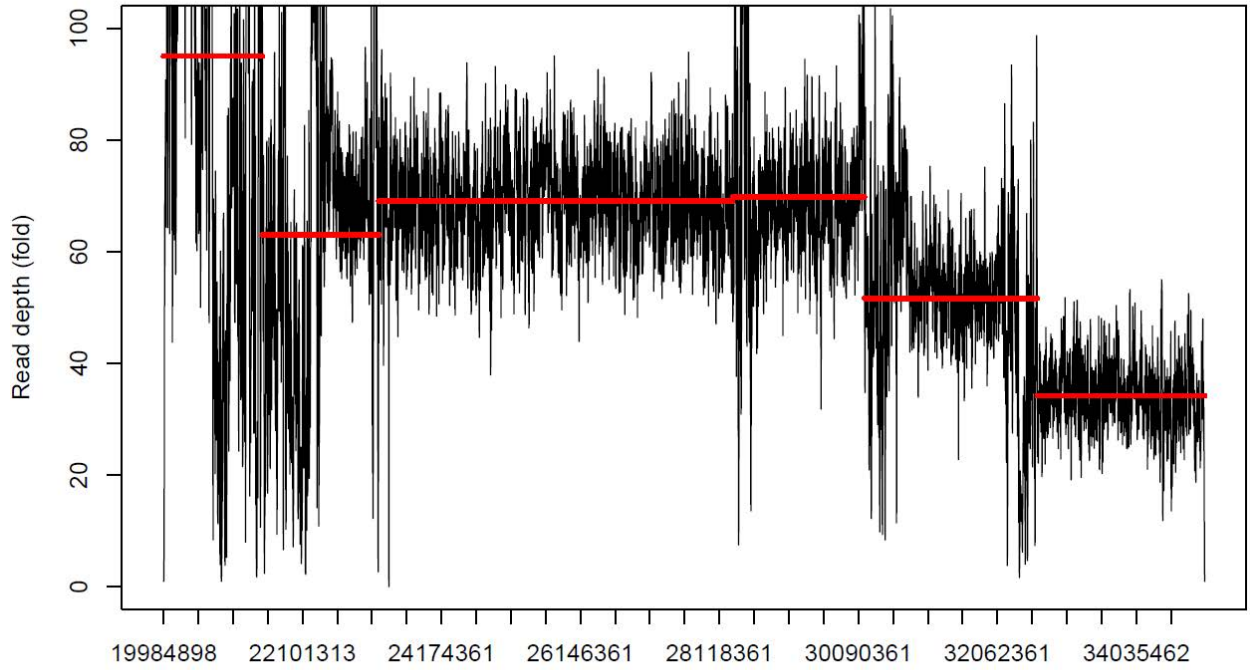

chr15 position (GRCh38)

**S014 ONT depth profile**

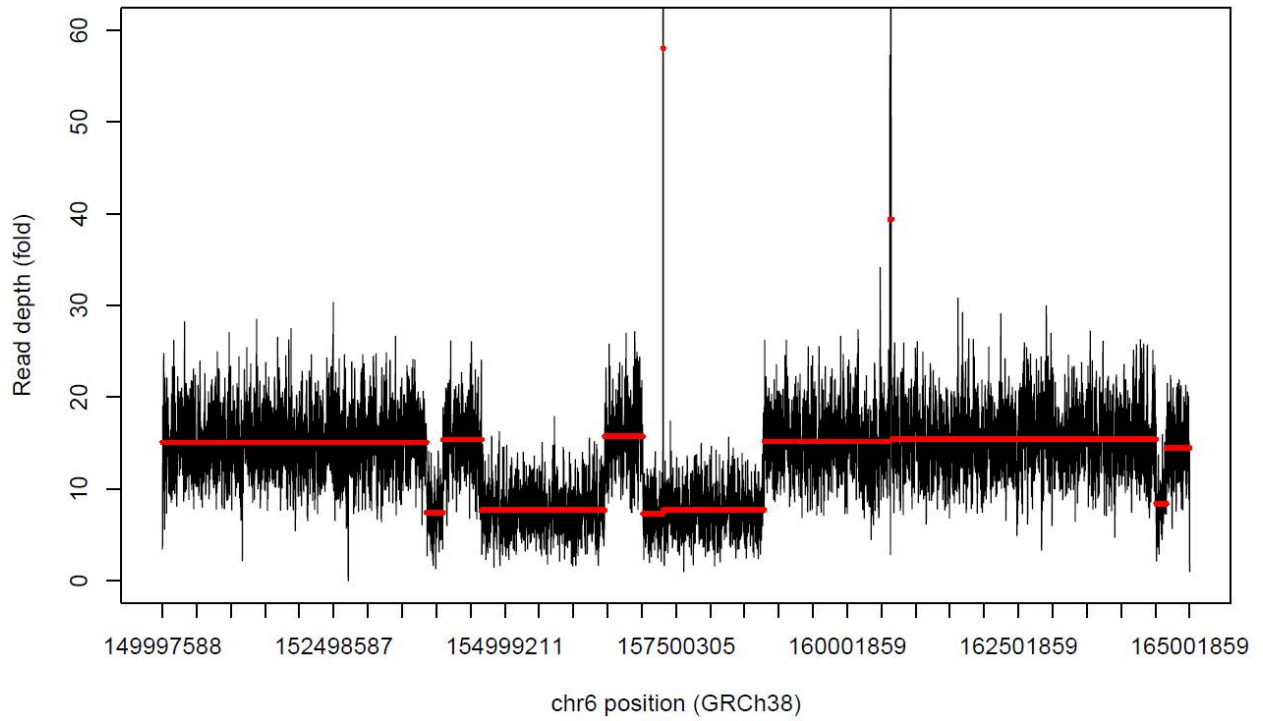

**S020 ONT depth profile**

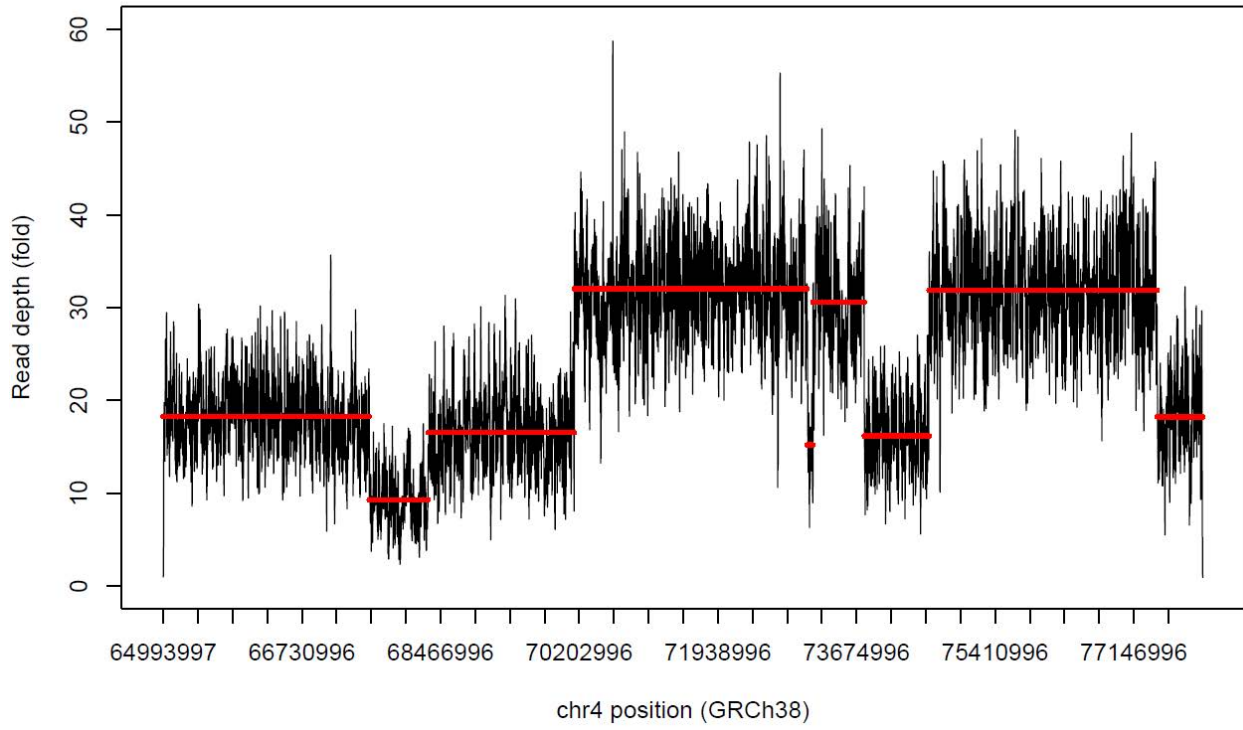

**S020 ONT depth profile**

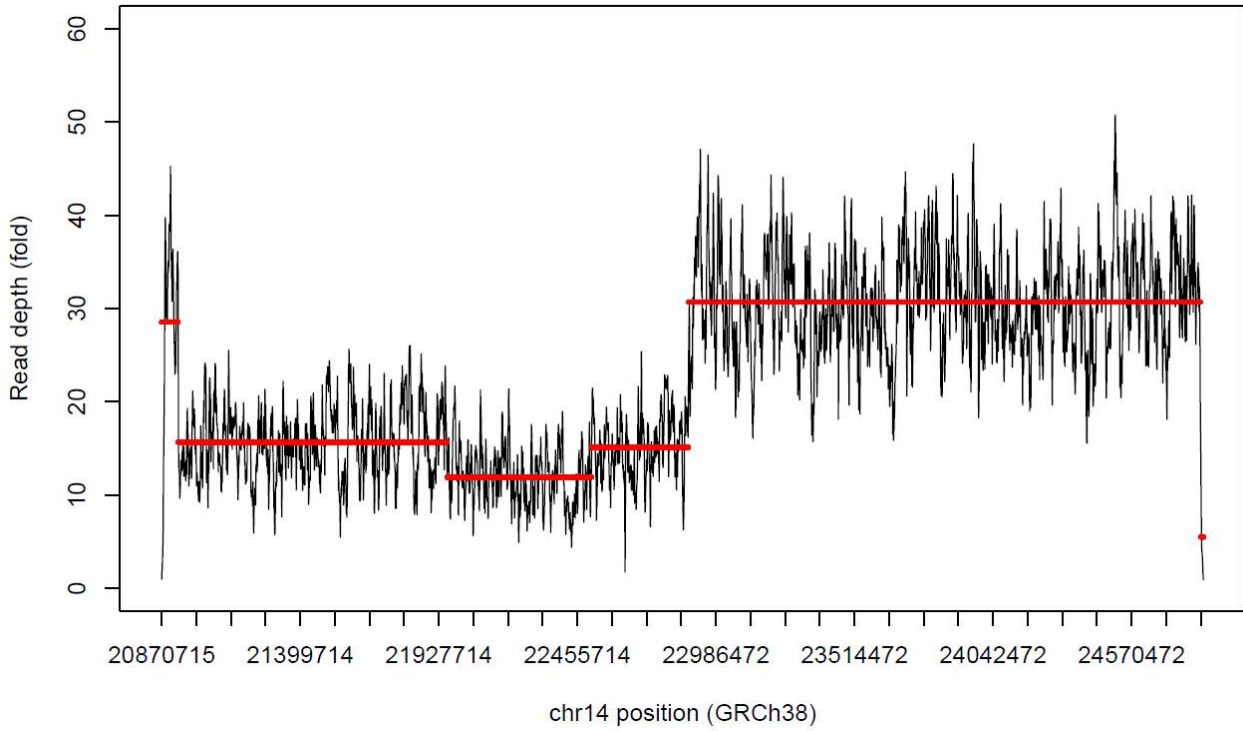

**S021 ONT depth profile**

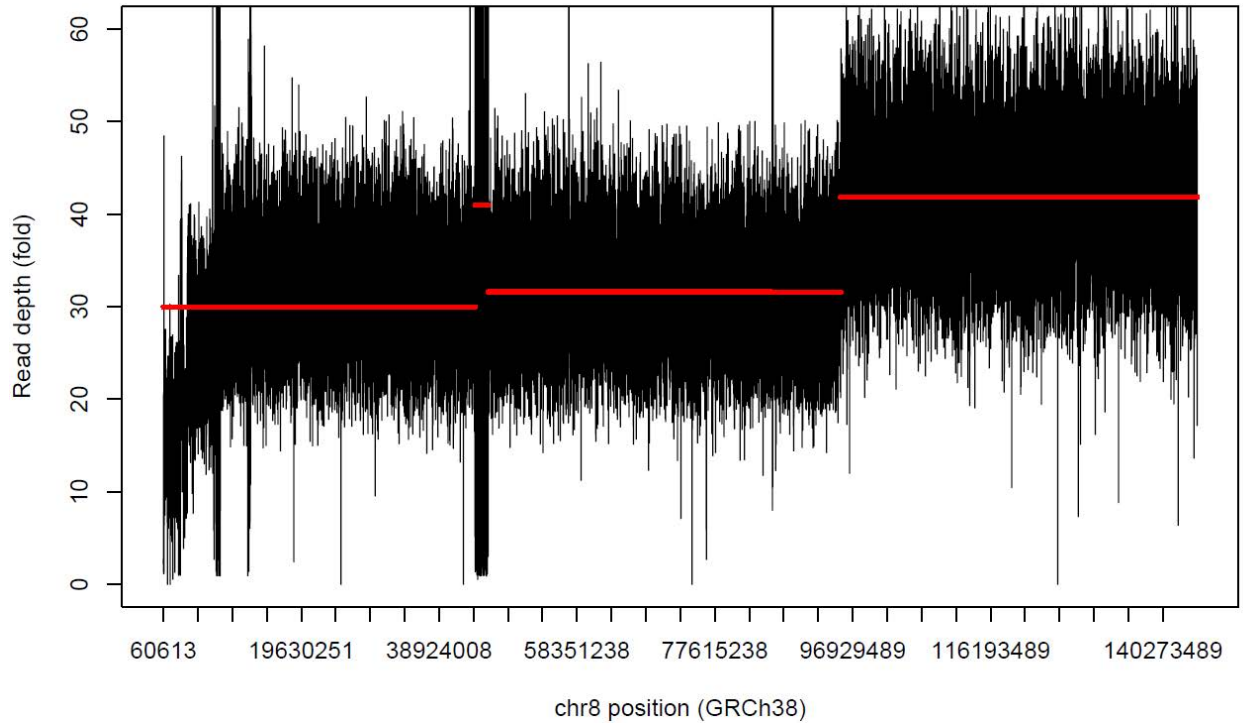

**S022 ONT depth profile**

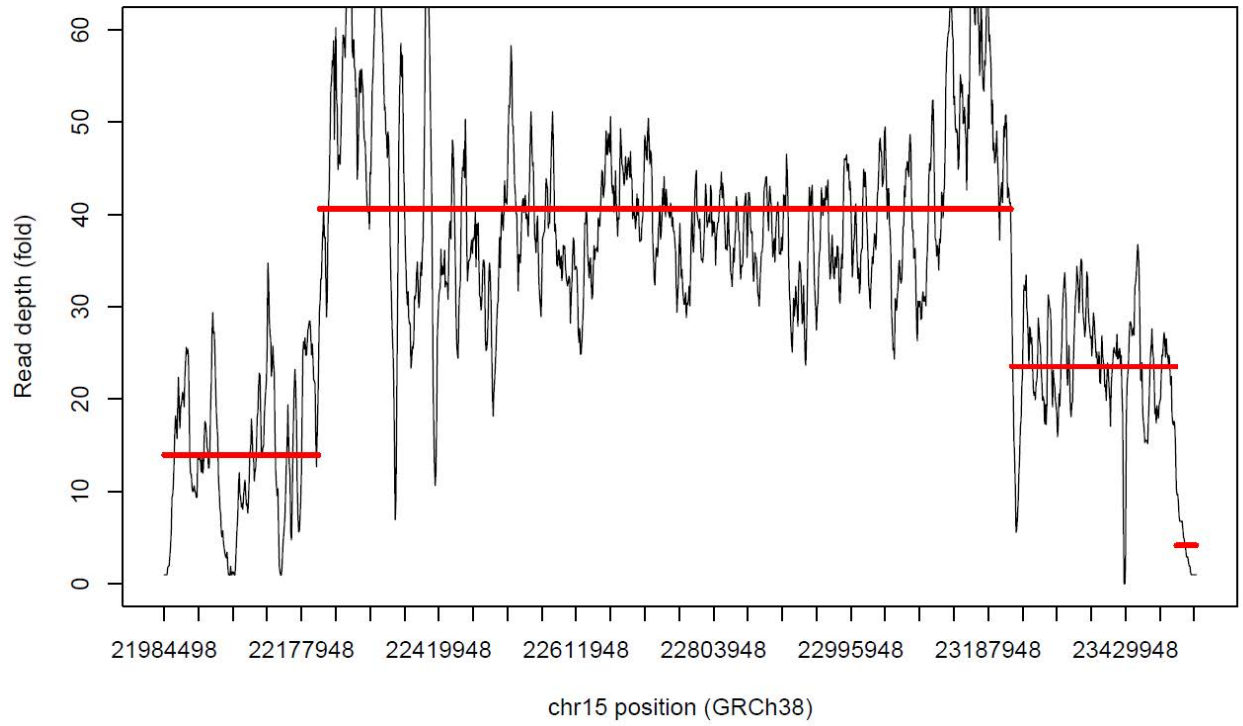

**S035 ONT depth profile**

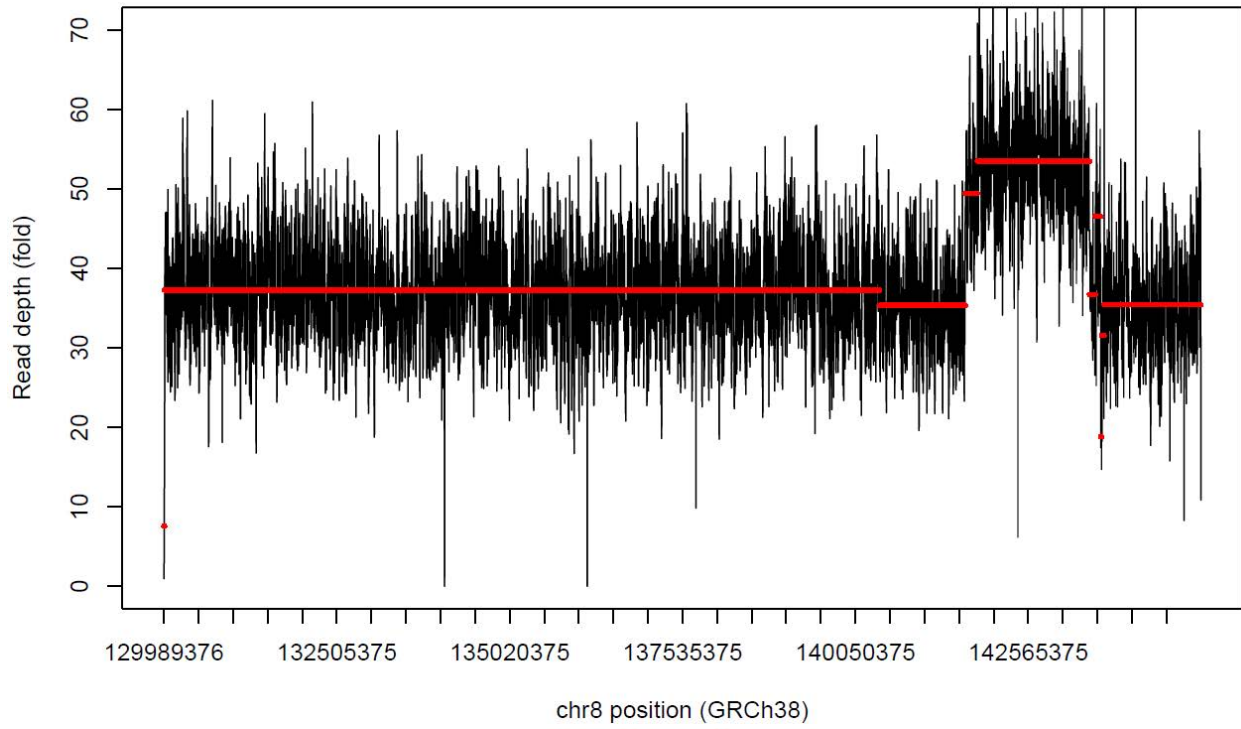

**S035 ONT depth profile**

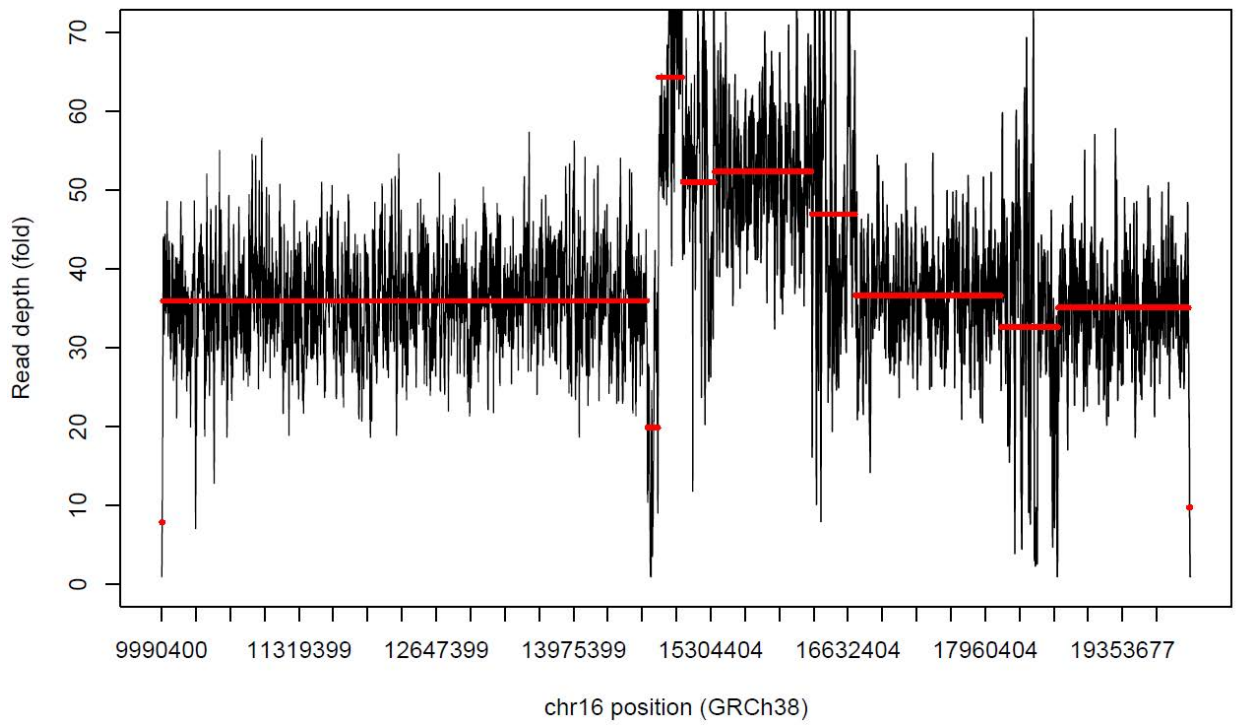



**S036 ONT depth profile**

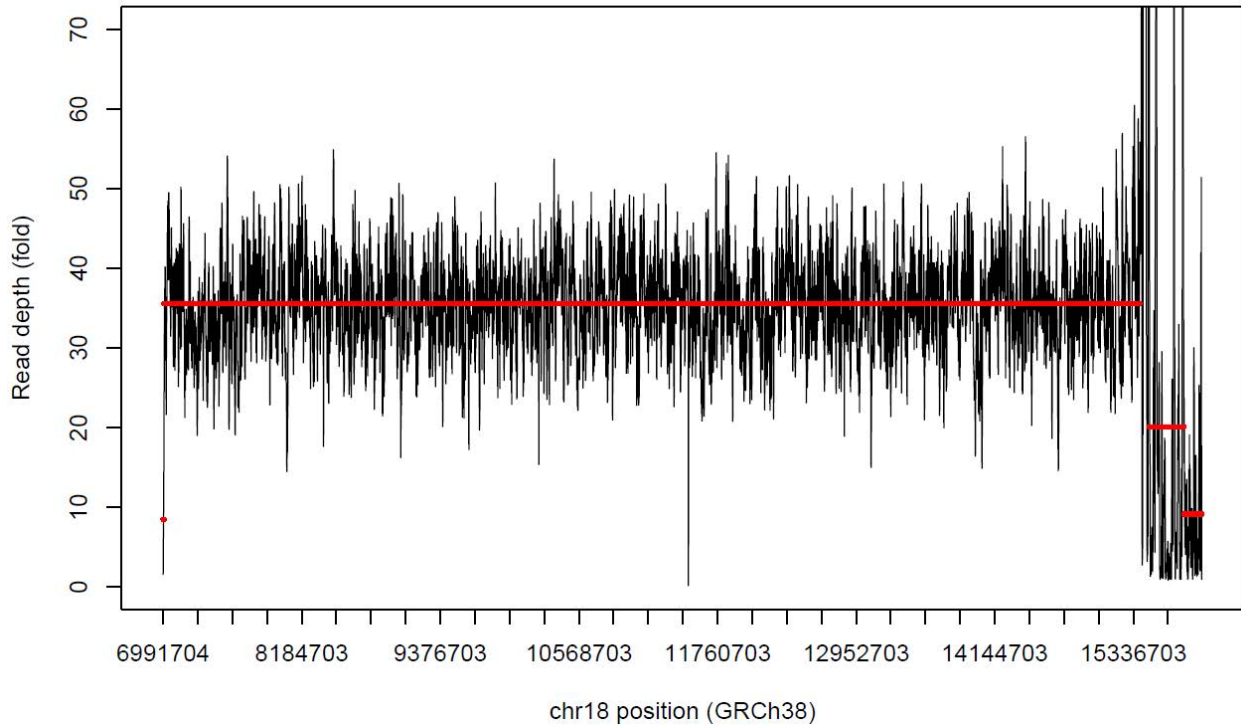

**S036 ONT depth profile**

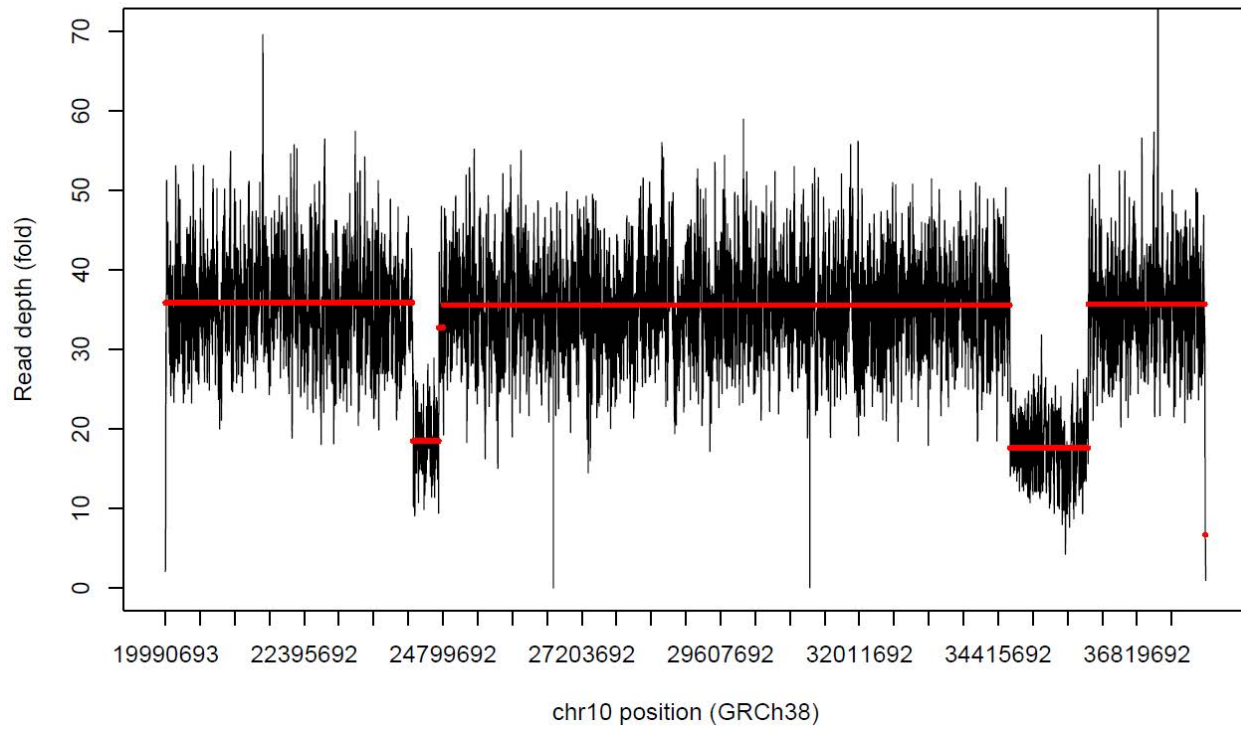

**S036 ONT depth profile**

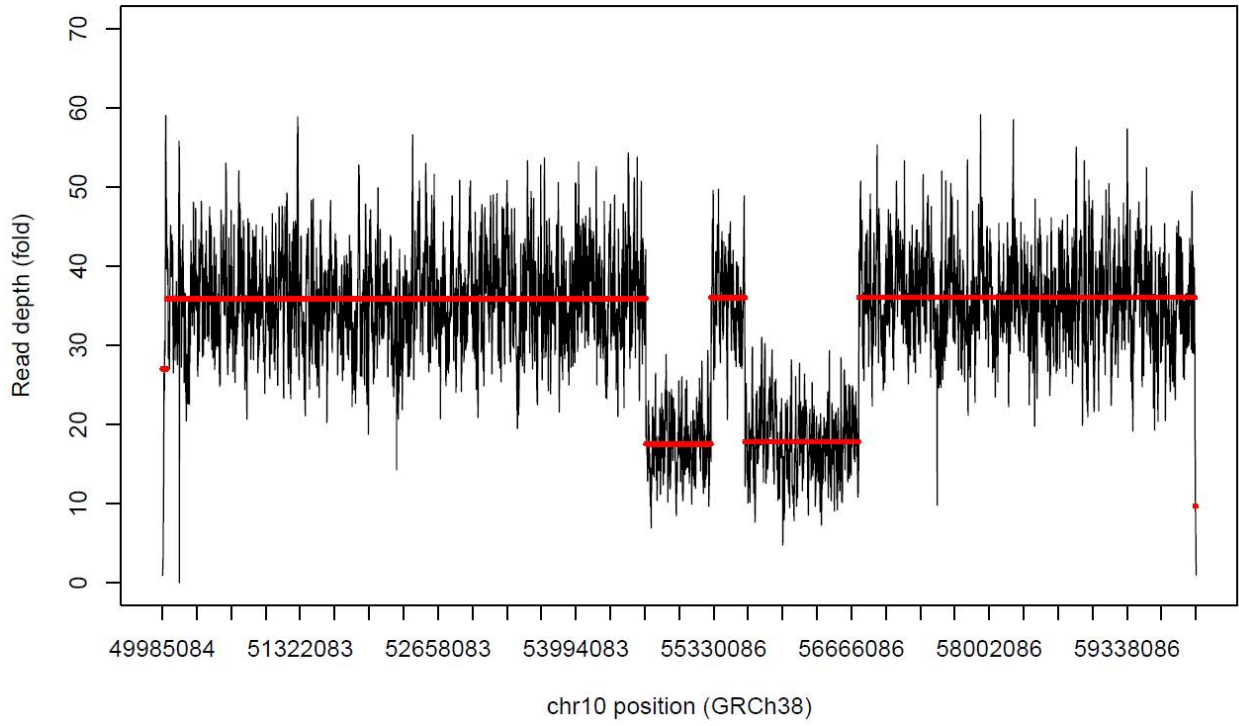

**depth\_S082\_tile\_chr10**

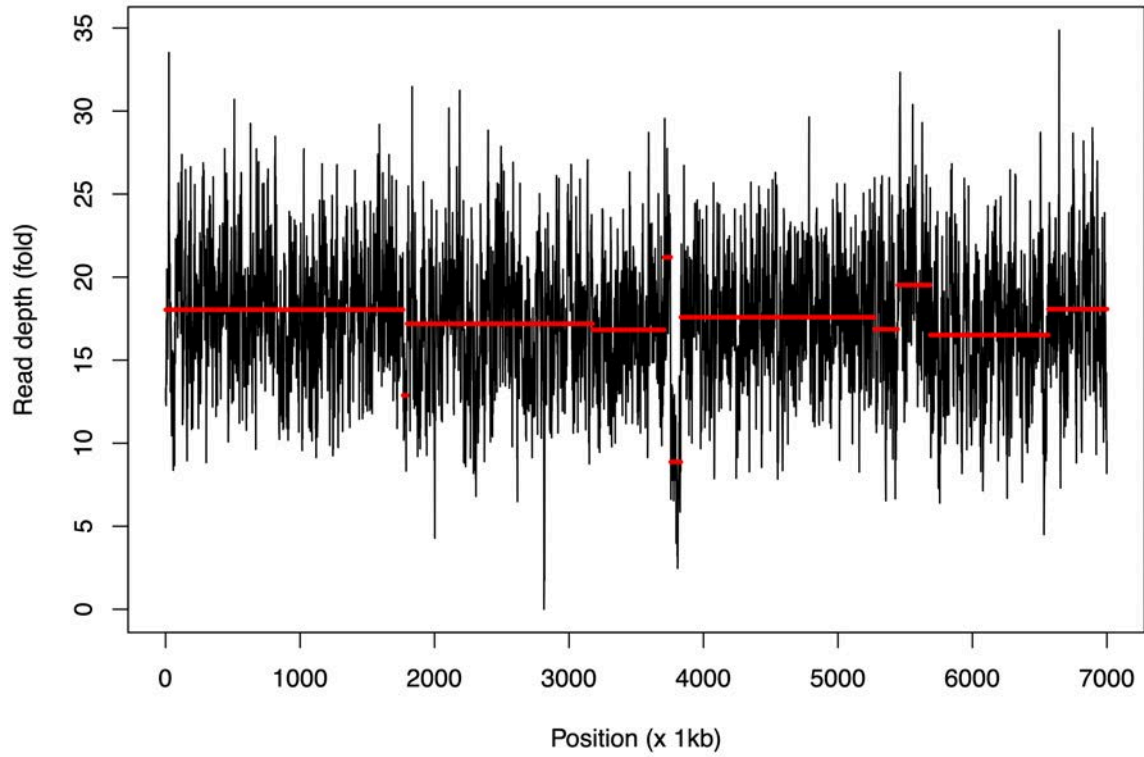

**depth\_S082\_tile\_chr17**

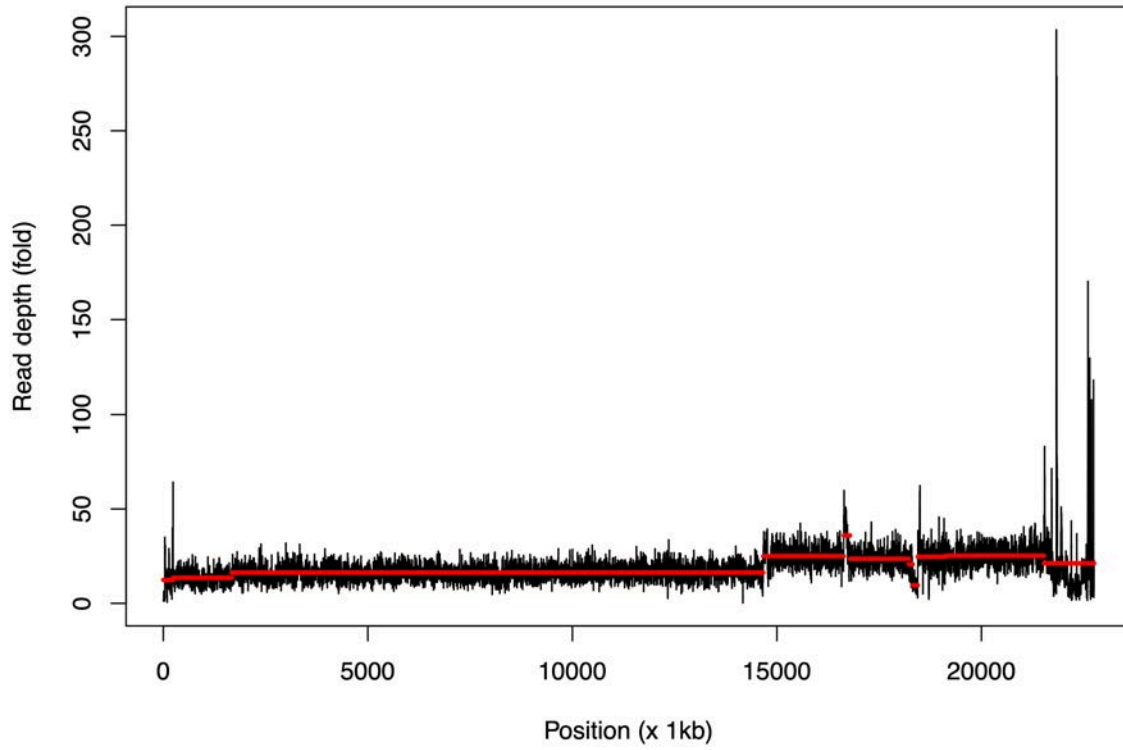

**S083 ONT depth profile**

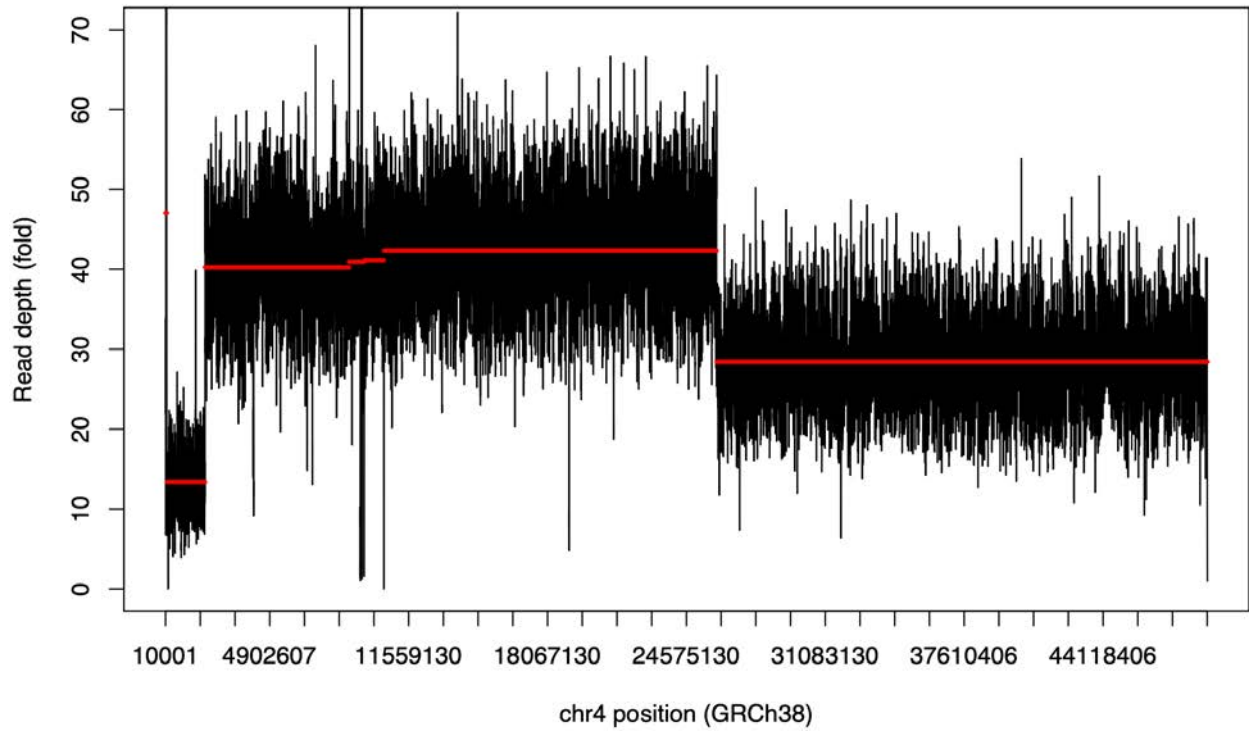

Figure S2. BK144-03, known 22q13.3 deletion.

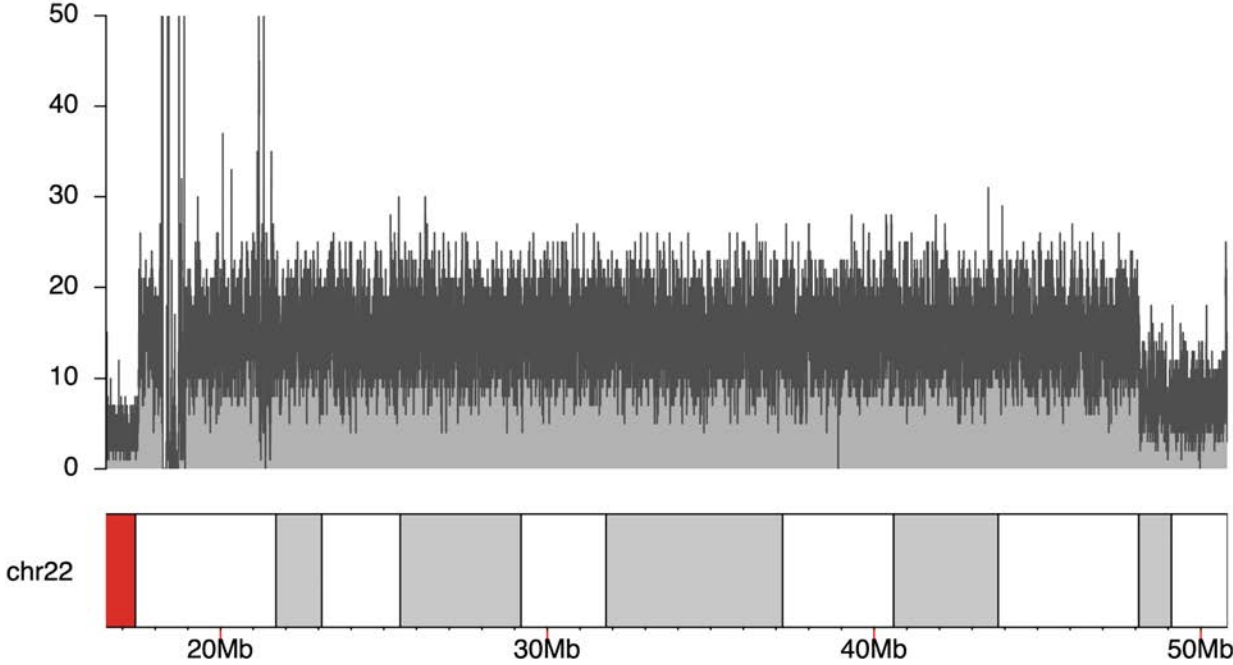

A. Coverage of the target region.

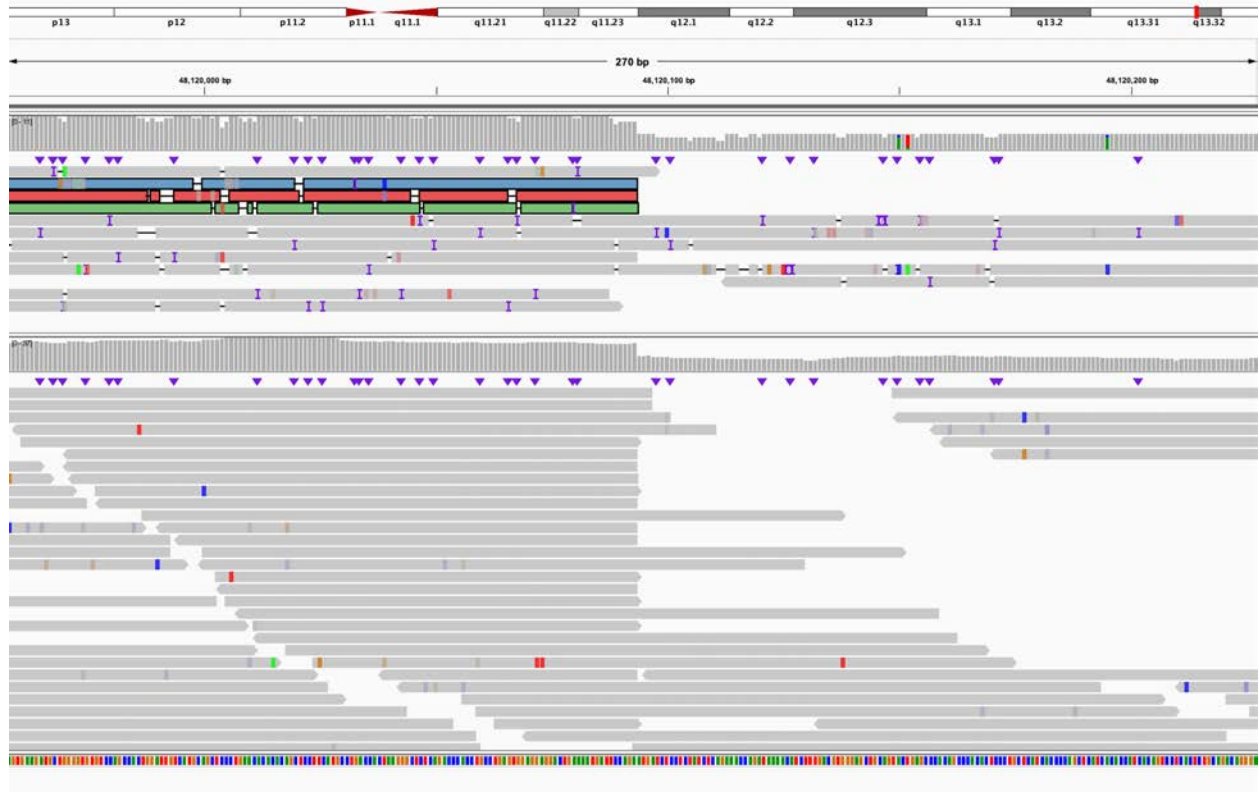

**B.** Centromere proximal end of deletion, long-read BAM file is top track, short-read BAM is bottom track. Long reads that span the deletion breakpoint are highlighted with color; IGV view is chr22:48,119,958-48,120,228.

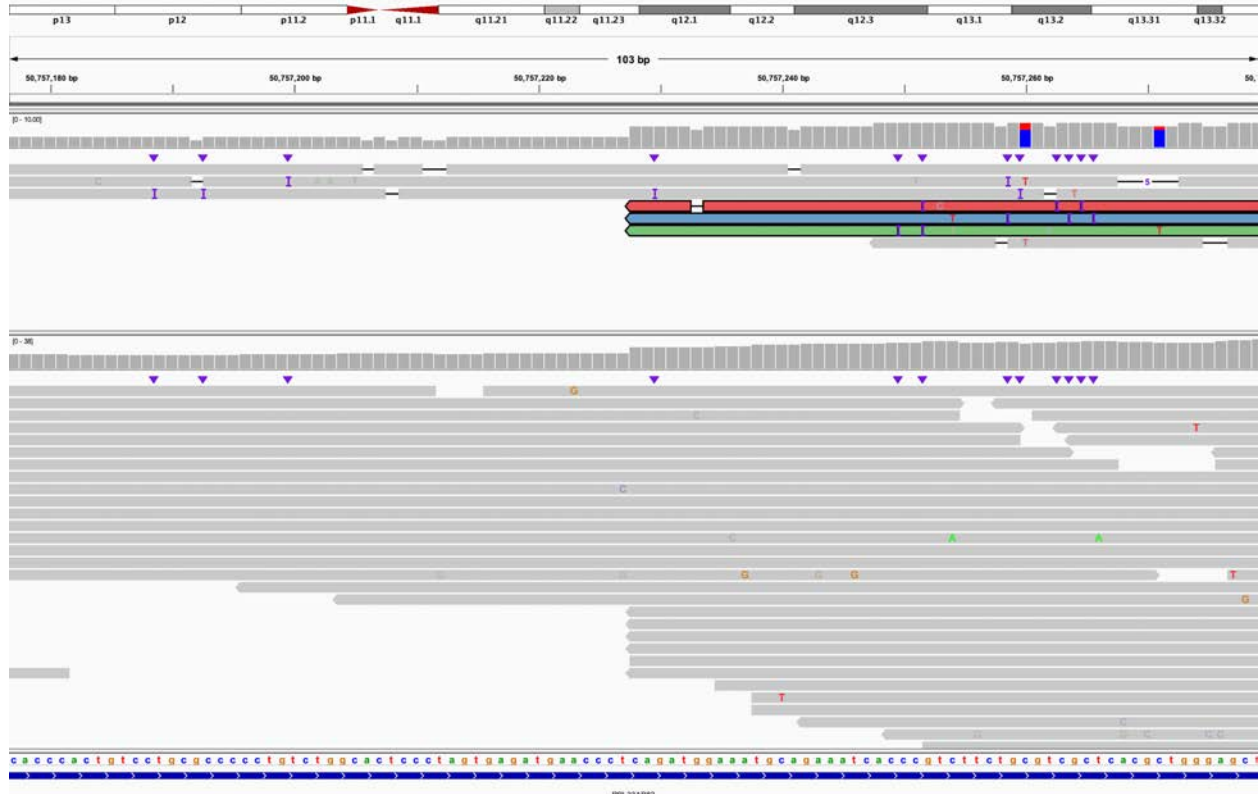

C. Telomere proximal end of deletion, long-read BAM file is the top track while short-read file is the bottom track. Long reads that span the deletion are colored as in (B); IGV view is chr22:50,757,177-50,757,279.

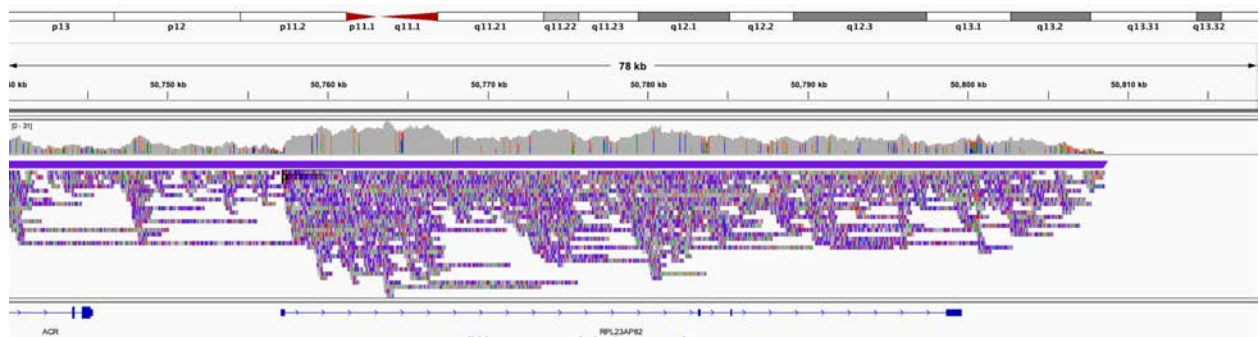

D. IGV view of only long reads at the end of chromosome 22; view is chr22:50,739,987-50,818,468.

Figure S3. BK180-03, known 15q11-q13 duplication.

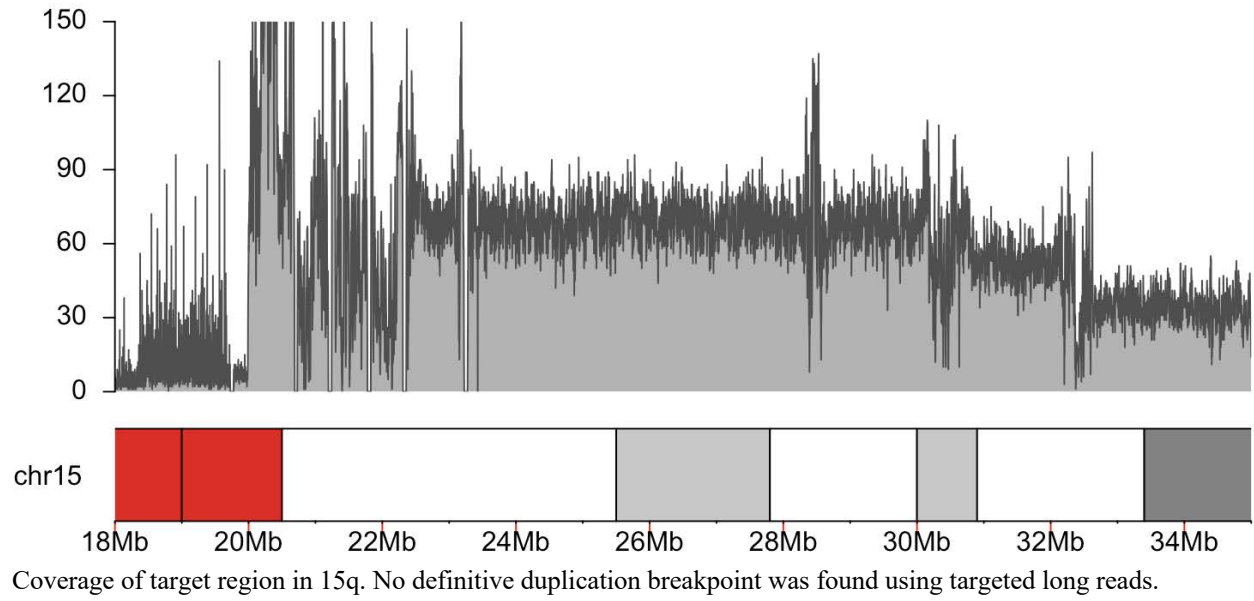

Figure S4. BK294-03, known 22q11.2 duplication.

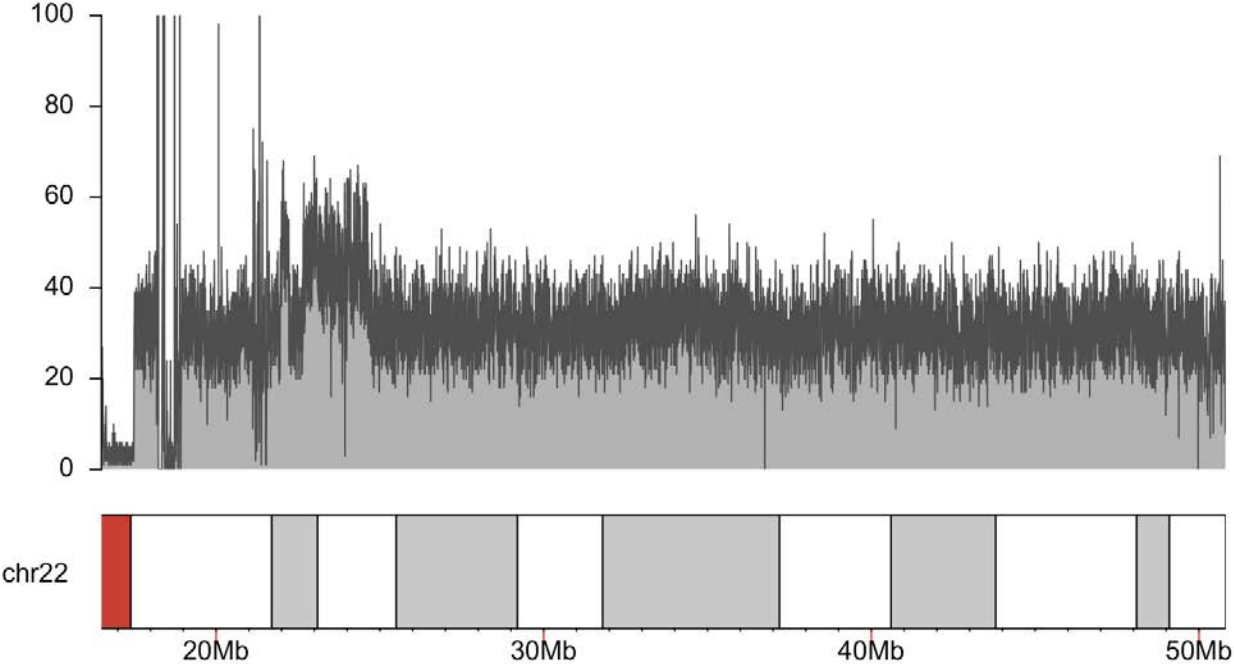

Coverage of chromosome 22 target region. No definitive duplication breakpoint was found using targeted long reads.



Figure S5. BK364-03, known 1p36.11 duplication.

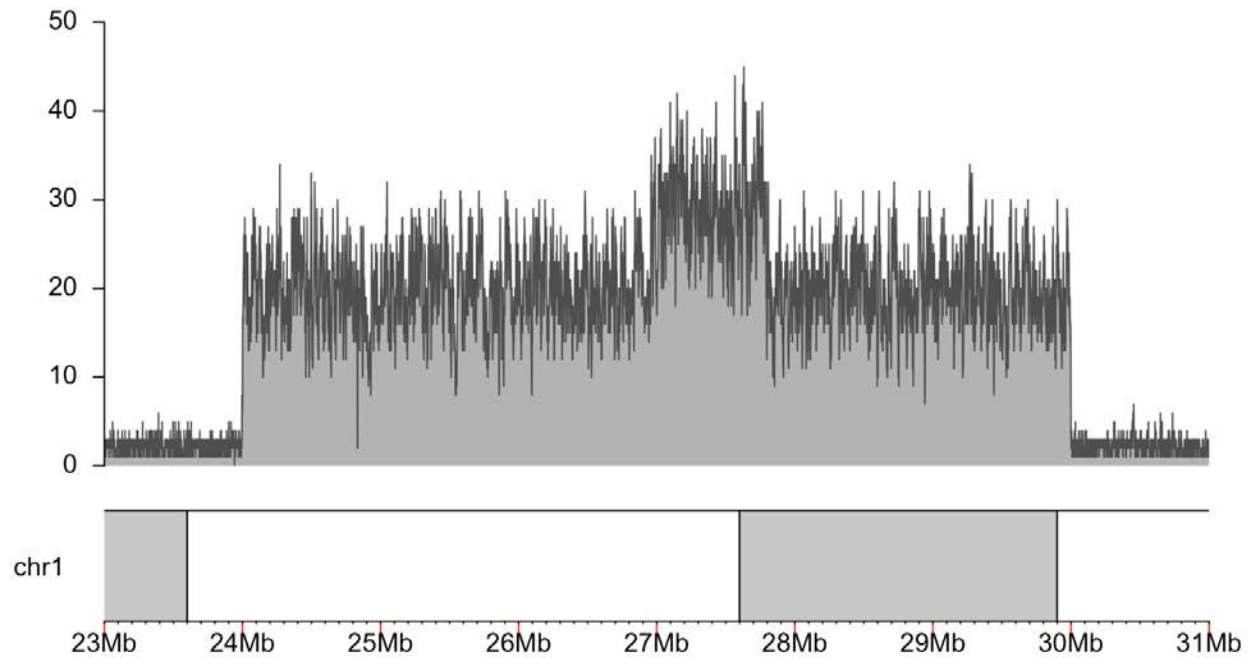

A. Coverage of target region demonstrating the presence of a duplication.

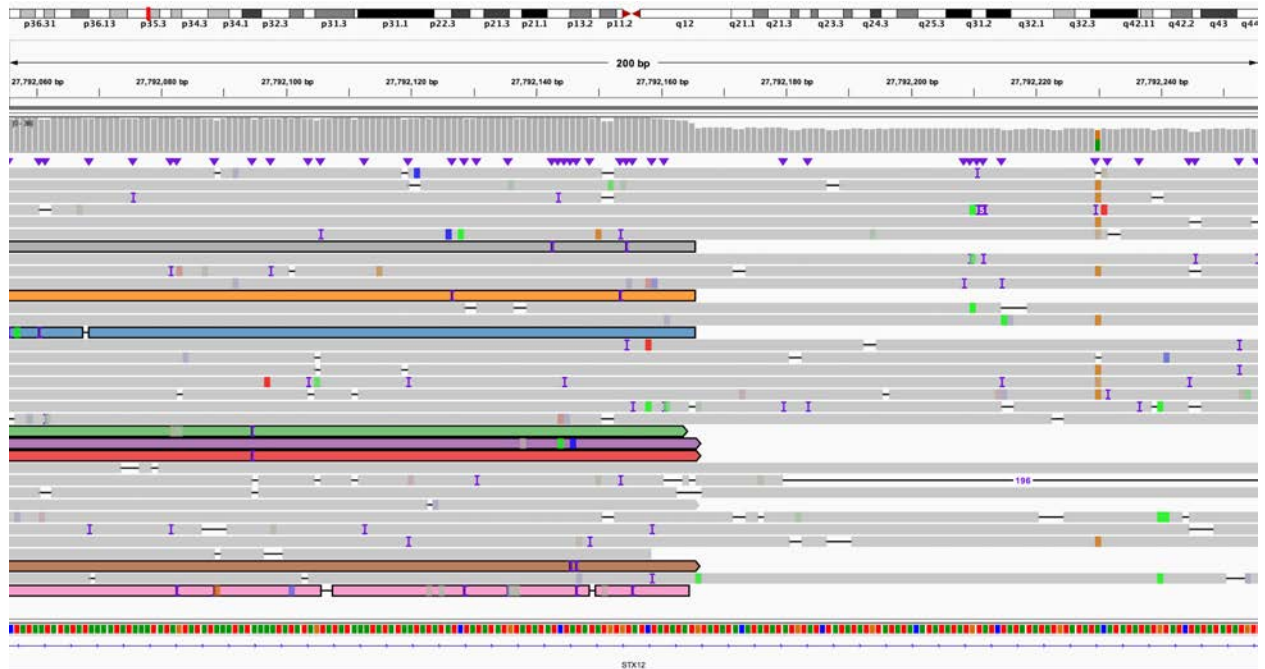

B. IGV view of 3' end, or centromere-proximal end of the duplication, reads that define the deletion breakpoint are represented by colors. IGV view is of chr1:27,792,056-27,792,256.

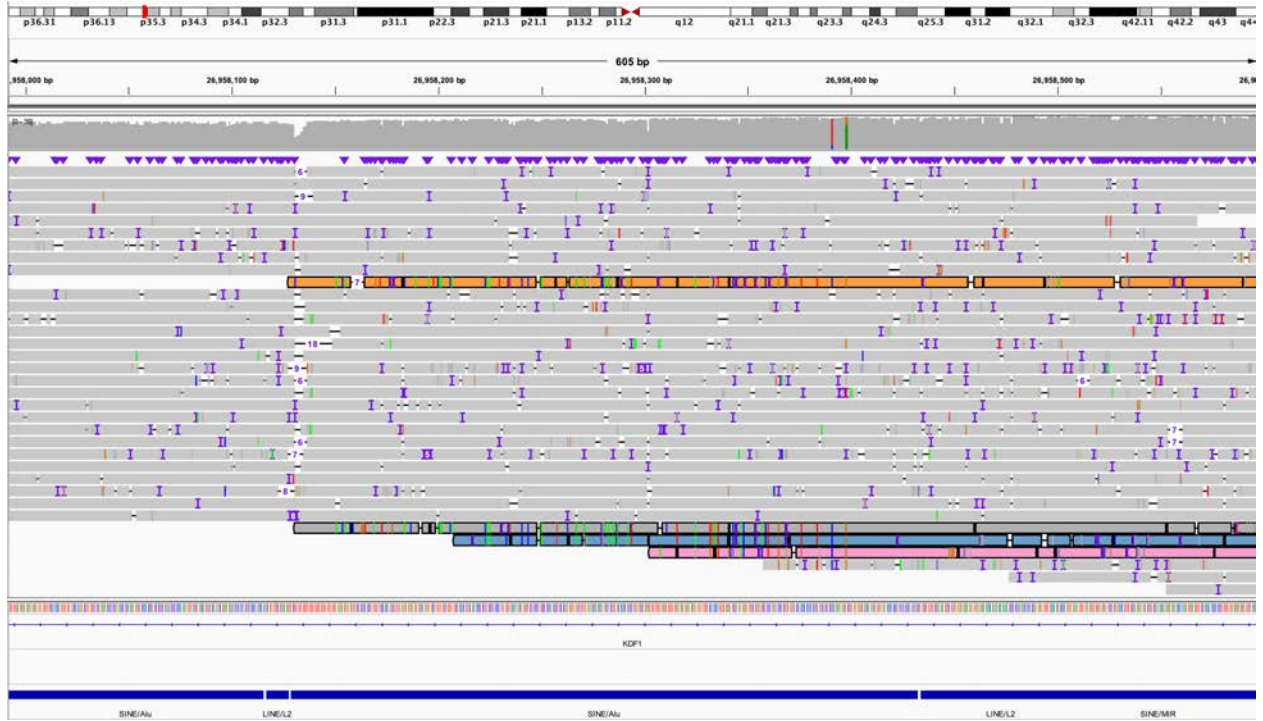

C. Reads from B are split and align to the 5' end, or telomere-proximal end of the duplication. The region contains several repetitive elements, as shown in the bottom track. IGV view is of chr1:26,956,878-26,959,178.

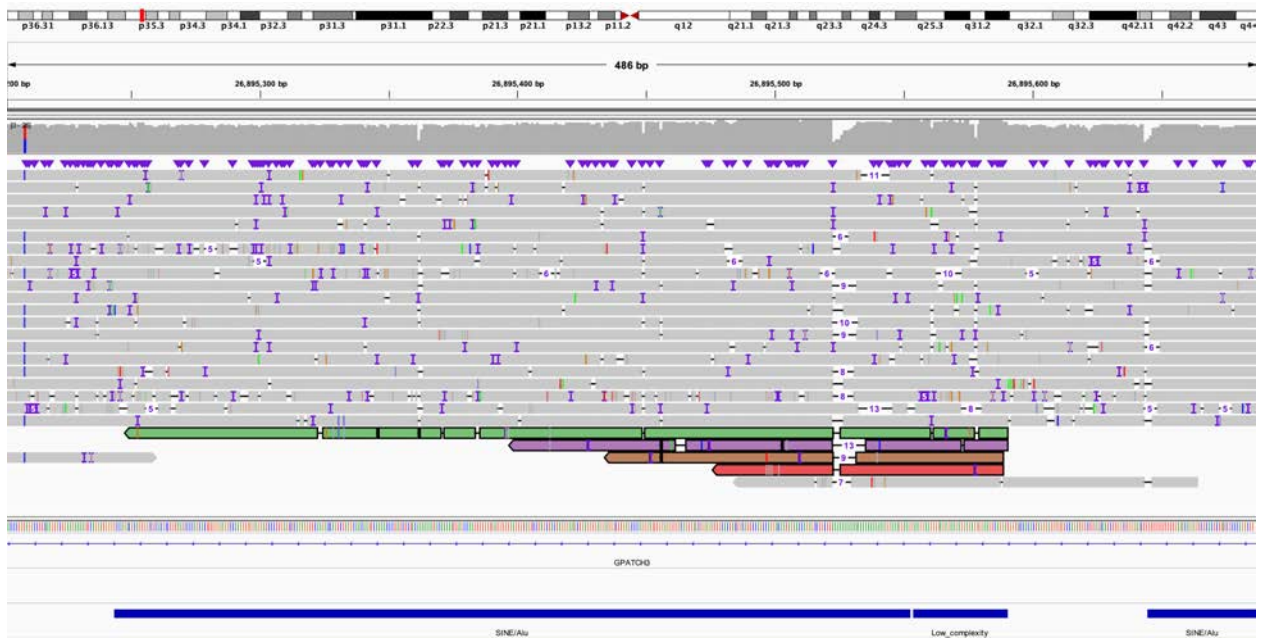

D. Fragments of four reads seen in B align incorrectly to a region outside of the duplicated region that includes a SINE/Alu and low-complexity region (bottom track); these fragments are notably shorter than those in C. IGV view is of chr1:26,895,202-26,895,689.

**Figure S6. BK397-101, known 16p11.2 deletion.**

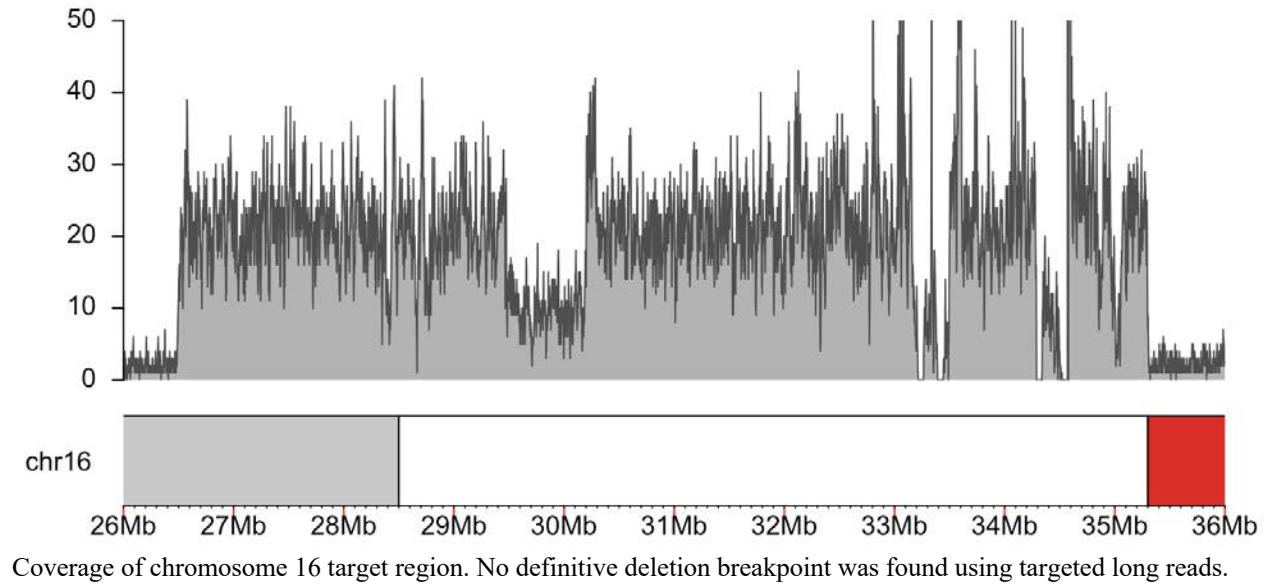

**Figure S7. BK430-103, known 16p11.2 duplication.**

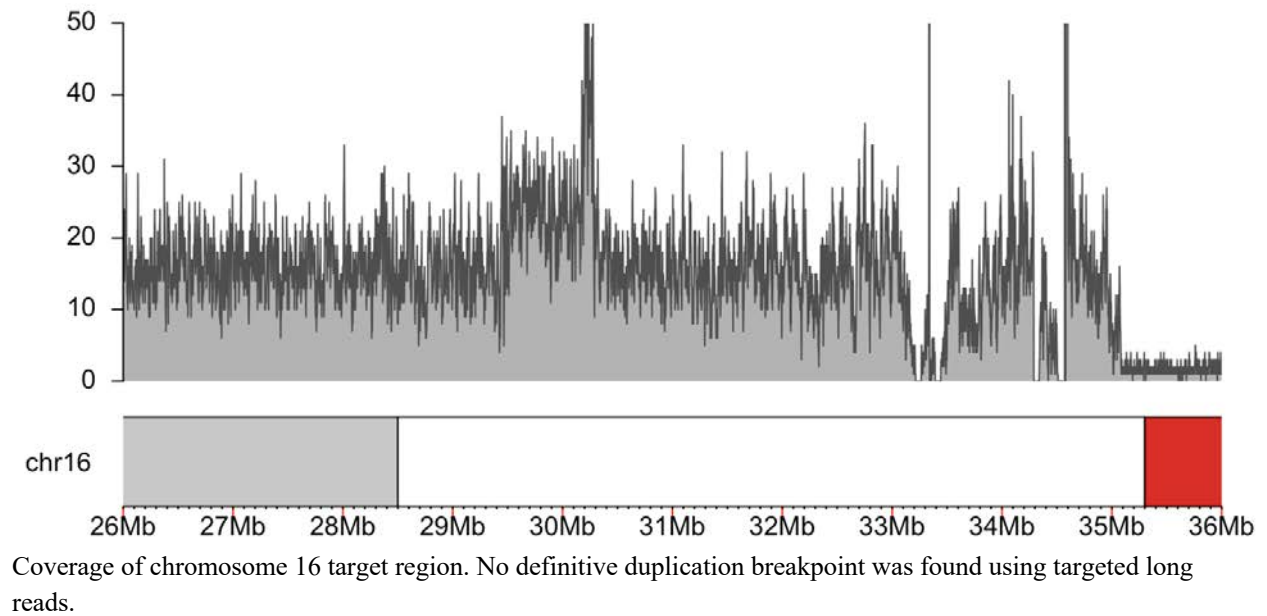

**Figure S8. BK482-101, known 1q21.1 duplication.**

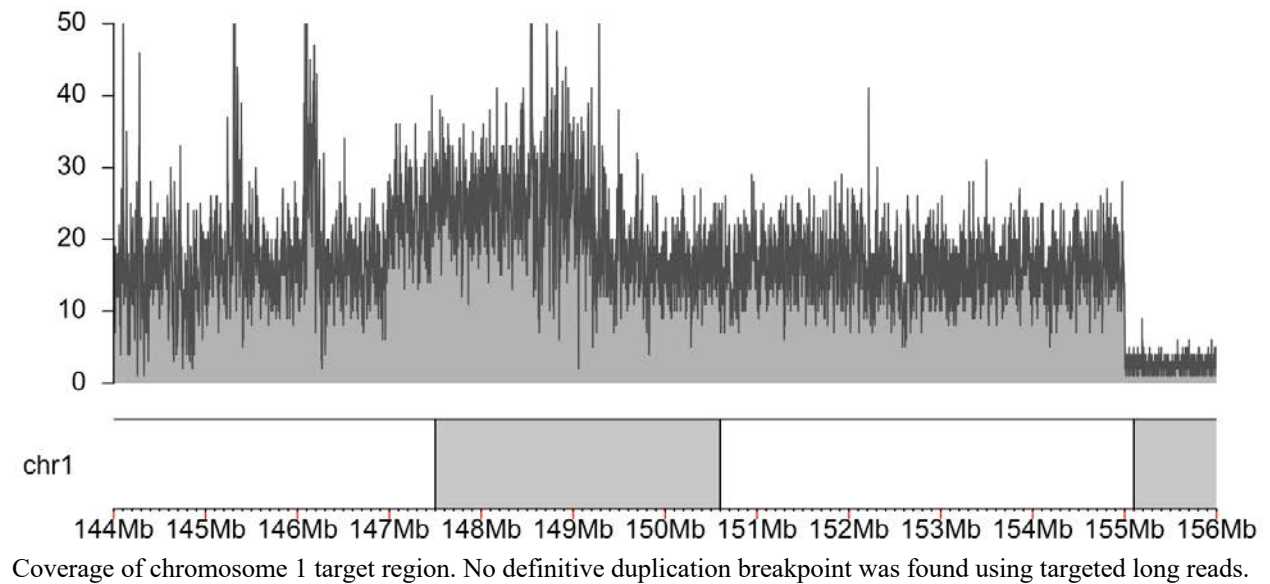

**Figure S9. BK487-101, known 1q21 deletion.**

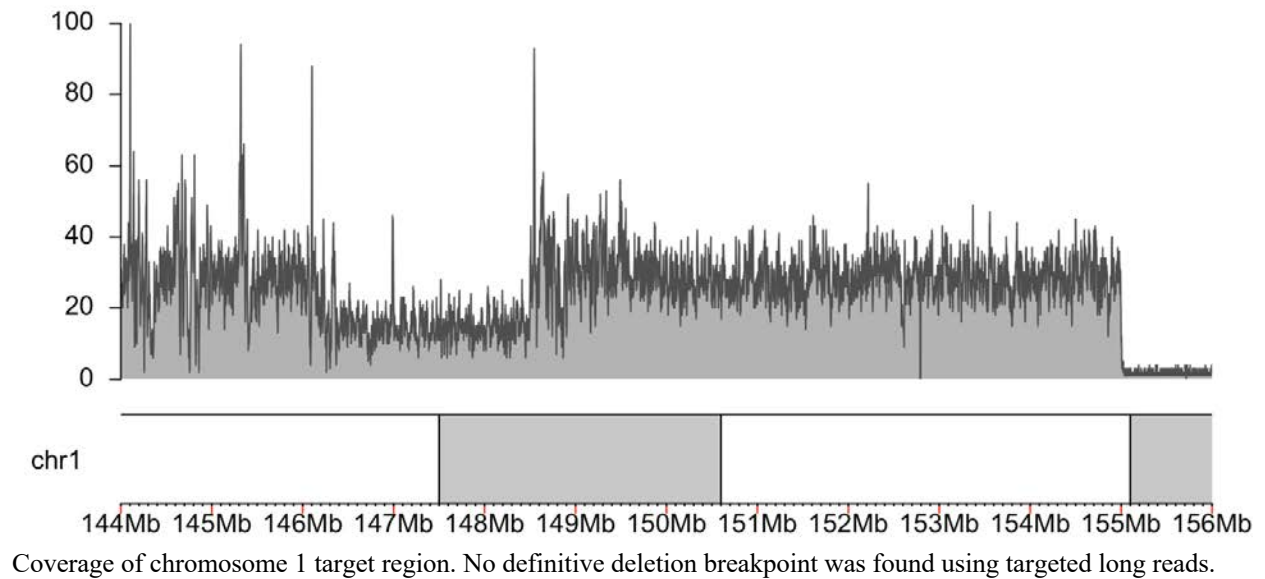

Figure S10. BK506-03, known 5p15.33 deletion.

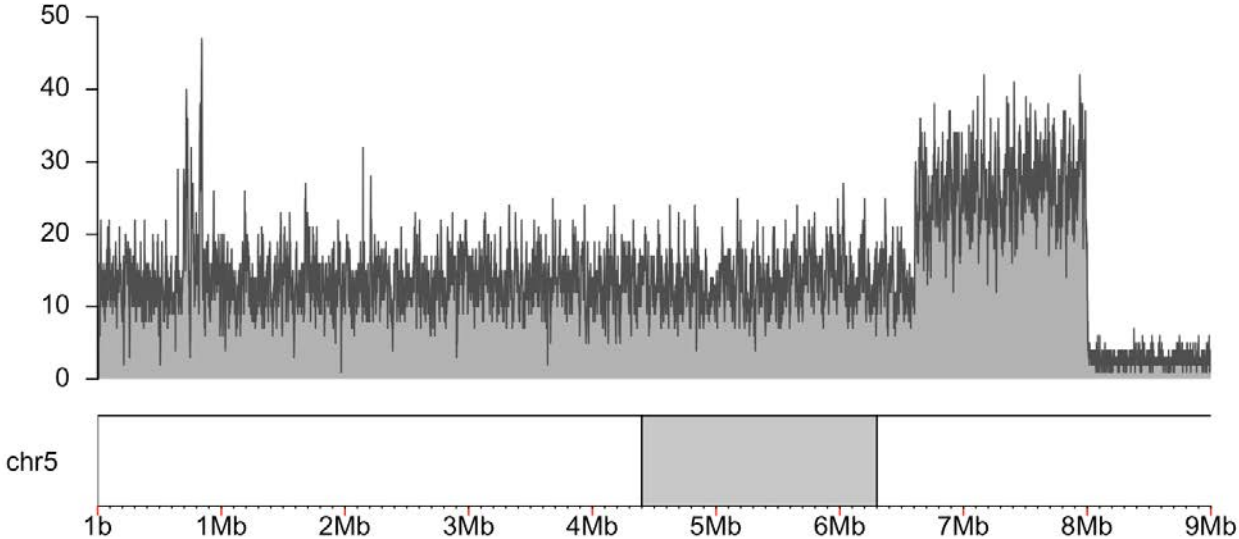

A. Coverage of chromosome 5 target region.

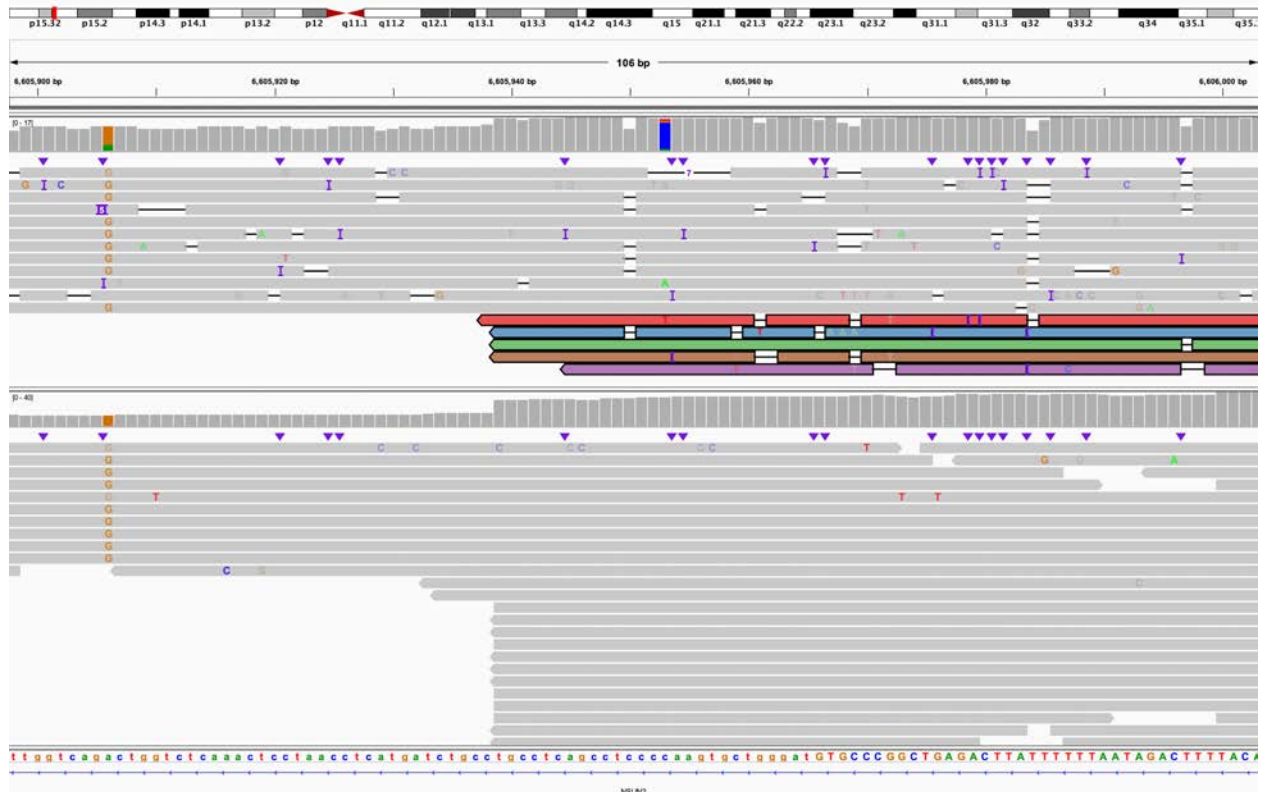

**B.** Breakpoint of the chromosome 5 deletion in IGV: long-read data is top track; short-read data is bottom track. Colors in top track correspond to colors of reads in C. View is of chr5:6,605,898-6,606,003.

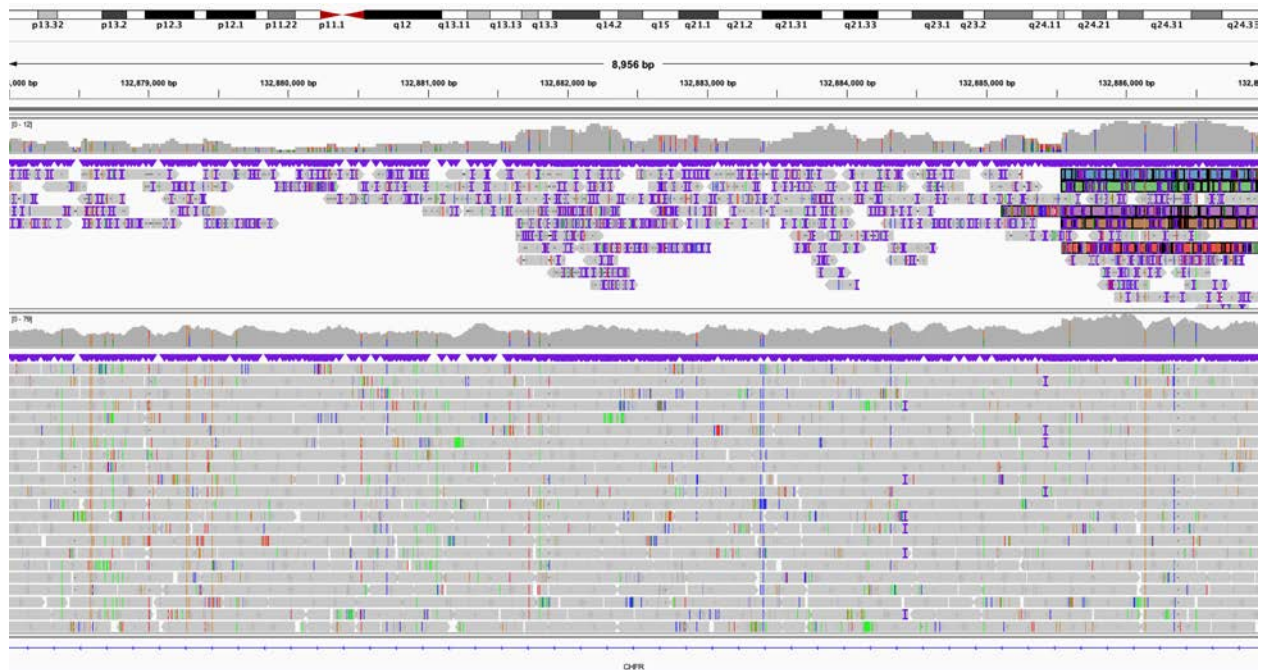

**C.** View of both long-read (top track) and short-read (bottom track) data from BK506-03 showing the centromere-proximal sequence is not deleted, but the telomere-proximal sequence is present in three copies. Long reads in the top track can be matched with those from B by their color. IGV view is chr12:132,877,990-132,886,995.



Figure S11. S016, known tandem duplication within *CTNND2*.

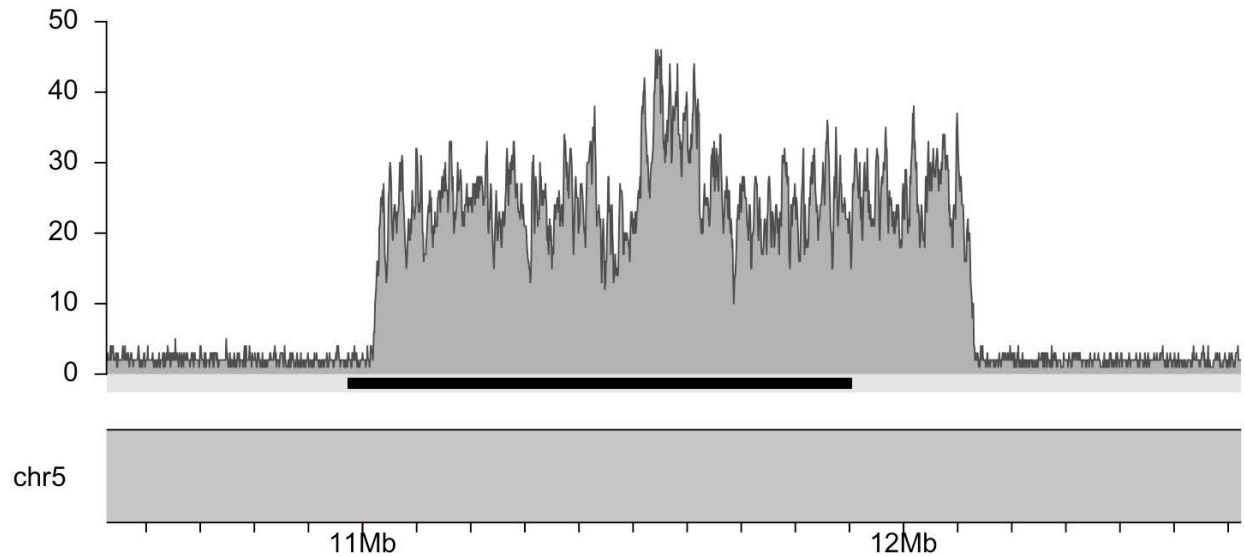

A. Coverage of duplication within *CTNND2*, gene body of *CTNND2* is represented by the black bar below the coverage graph.

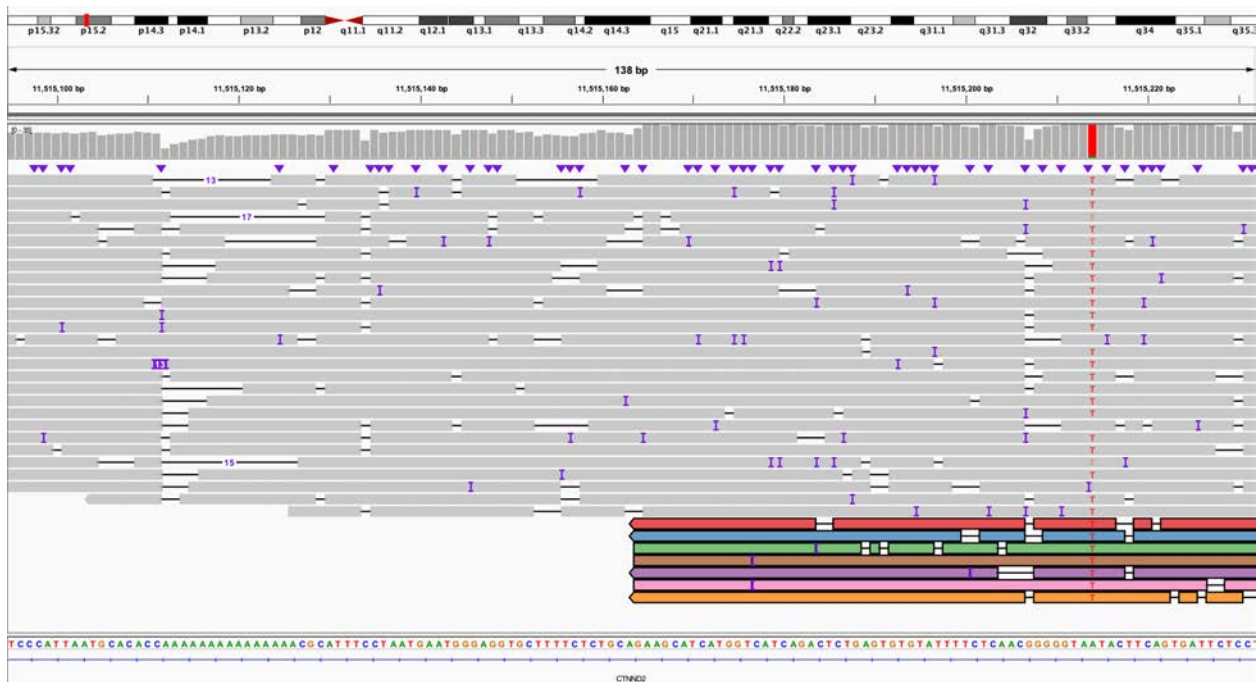

B. Reads in the telomere-proximal end of the duplication, colors correspond to reads in C. The orientation of reads in B and C confirm that it is a tandem duplication as previously shown.<sup>1</sup> IGV view of chr5:11,515,095-11,515,232.



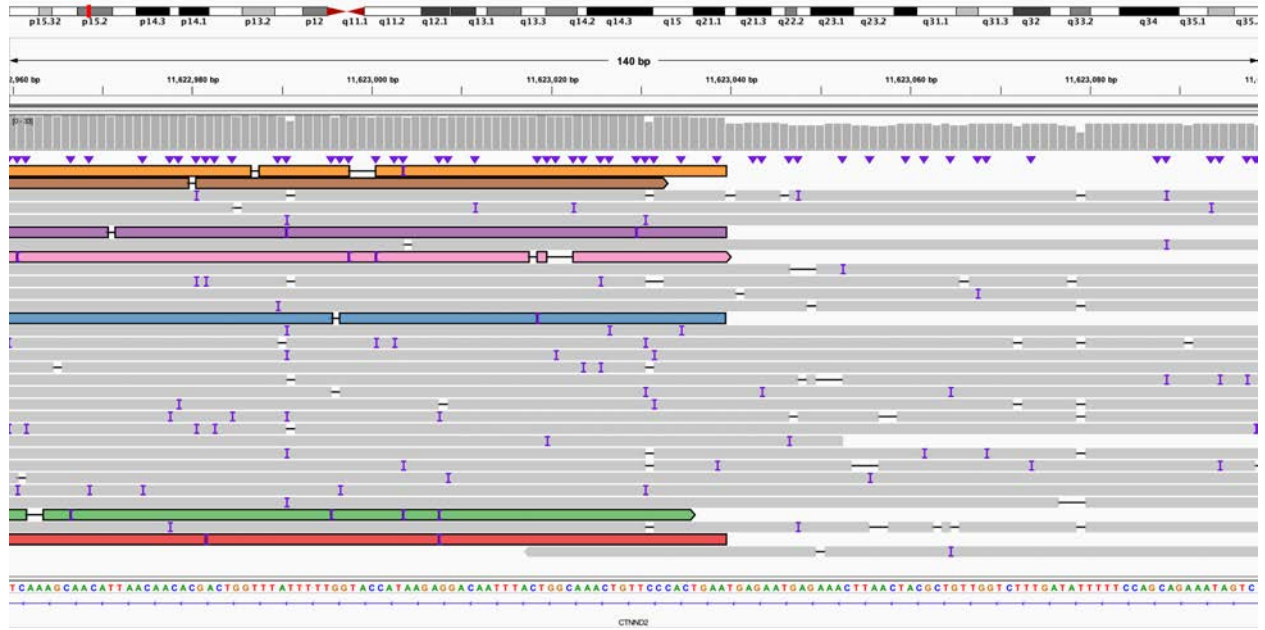

C. Reads from the centromere-proximal end of the duplication, colors correspond to reads in B. IGV view is of chr5:11,622,960-11,623,099.

Figure S12. S023, mosaic ring 18 present in 40% of cells.

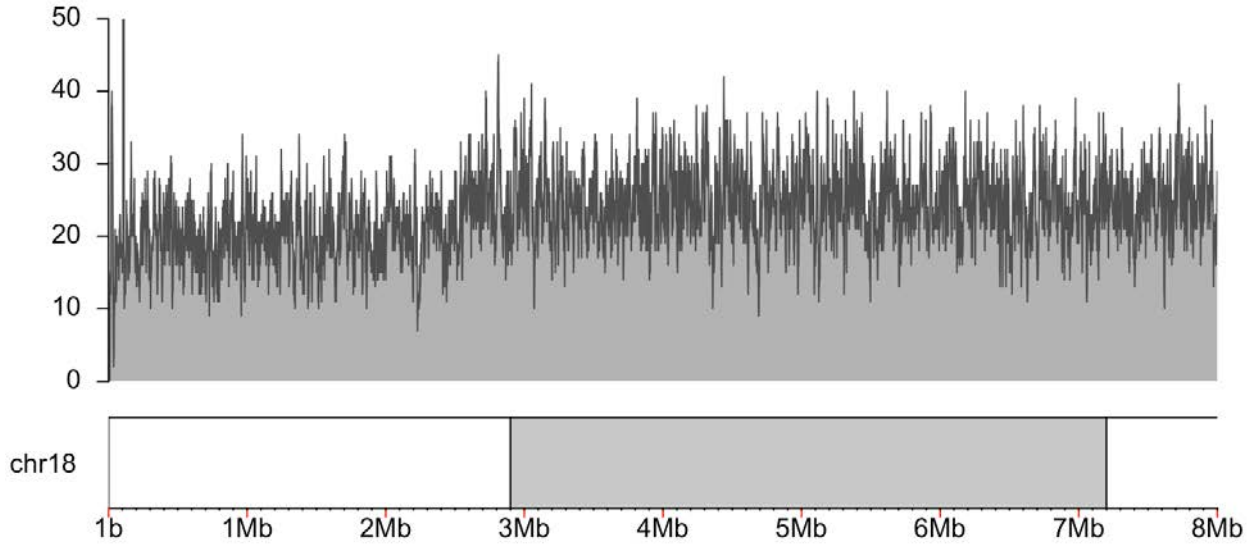

A. Coverage of chromosome 18p target region shows mosaic copy loss.

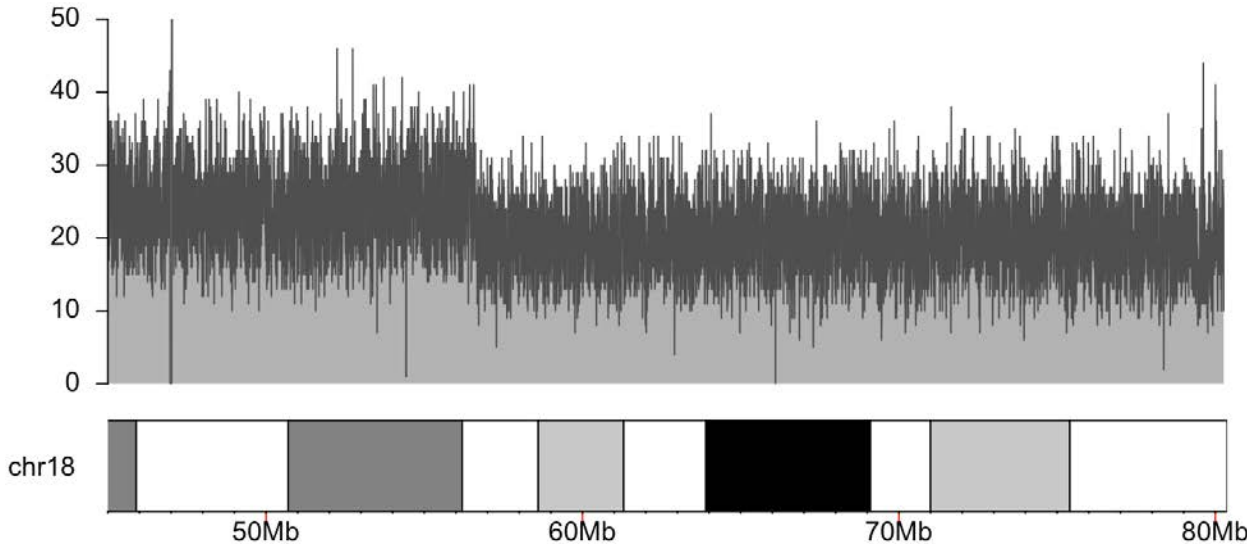

B. Coverage of chromosome 18q target region shows mosaic copy loss.

Figure S13. S046, known unbalanced translocation between chromosomes 4 and 15.

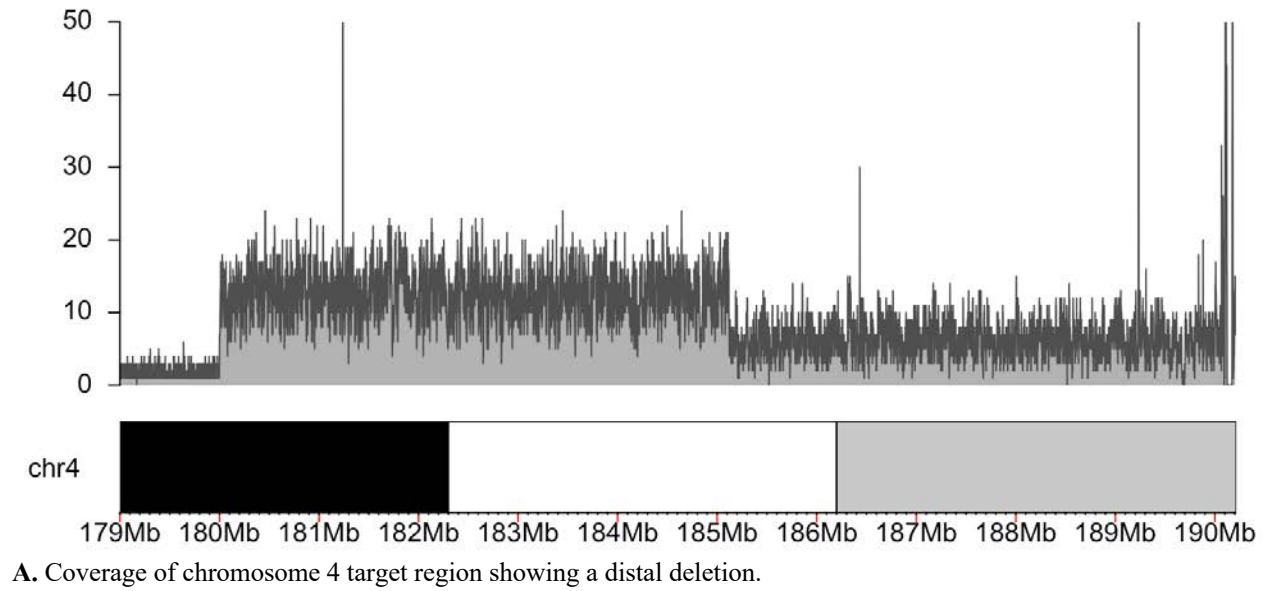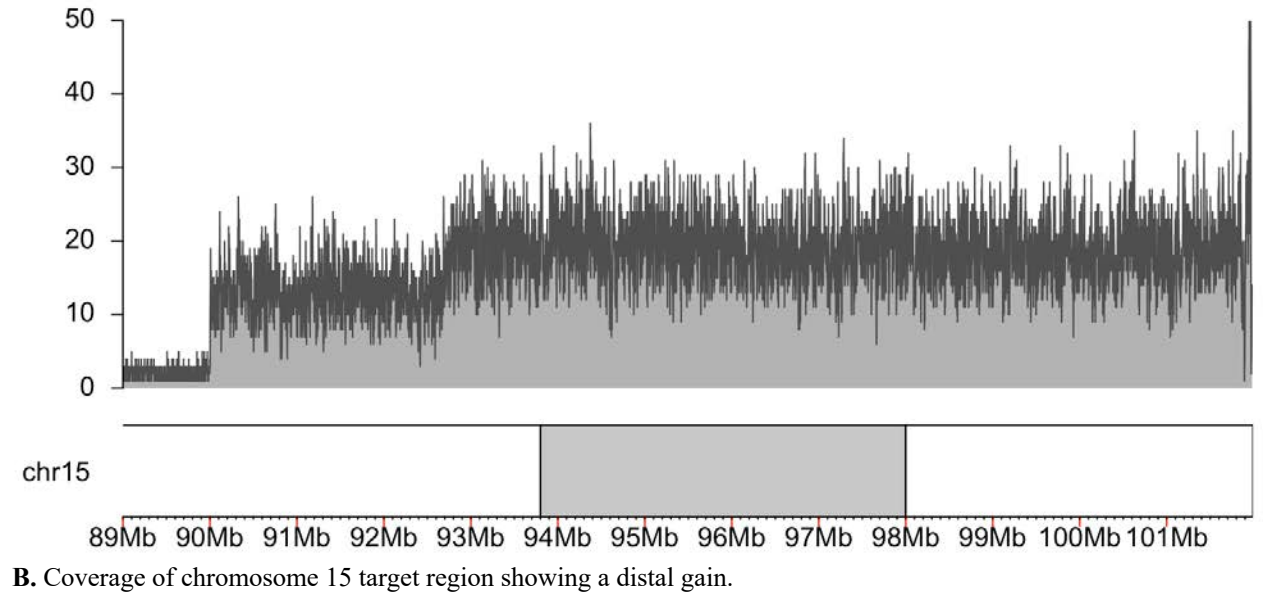



Figure S14. S060, known translocation between chromosomes 12 and 17 thought to affect *SOX9*.

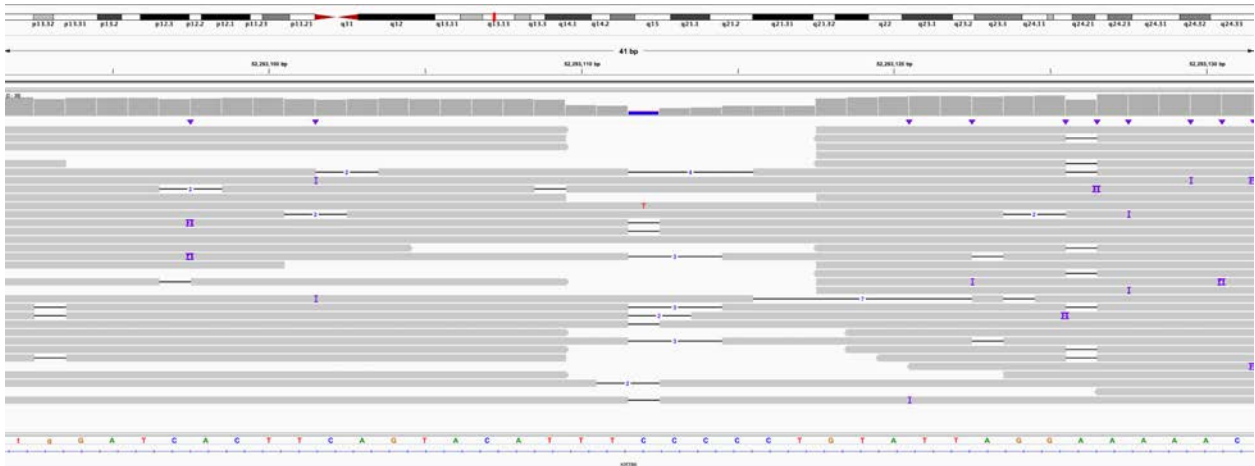

A. Screenshot of chromosome 12 showing translocation breakpoints. IGV view is of chr12:52,293,092-52,293,131.

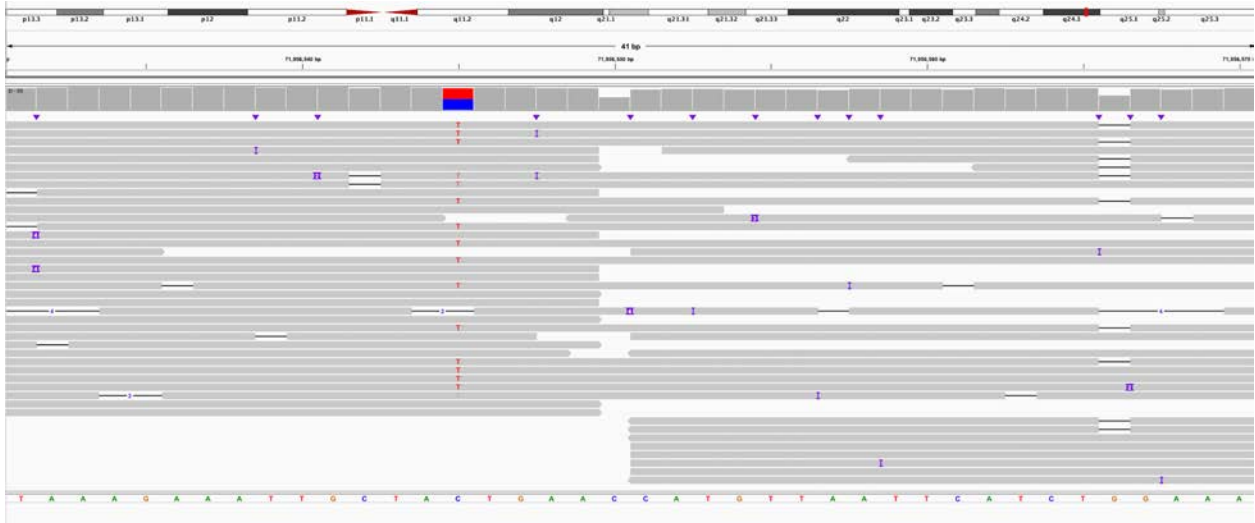

B. Screenshot of chromosome 17 showing translocation breakpoints. IGV view is of chr17:71,956,531-71,956,570.

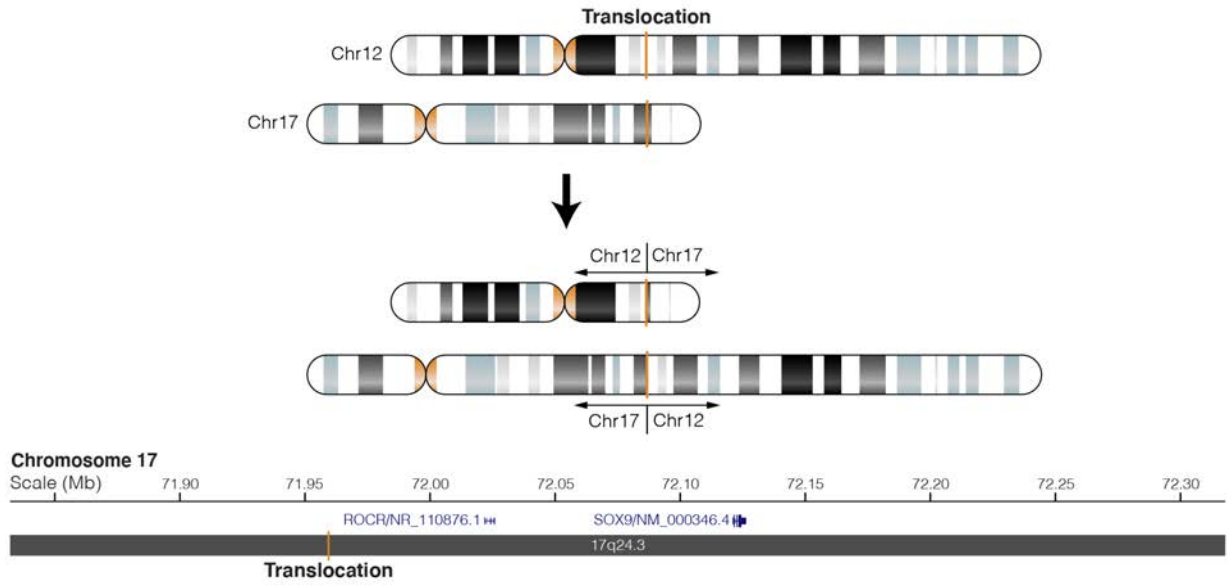

C. Cartoon of chromosome 12 and 17 translocations and breakpoints.

Figure S15. S063, known SVA insertion in *BRCA1*.

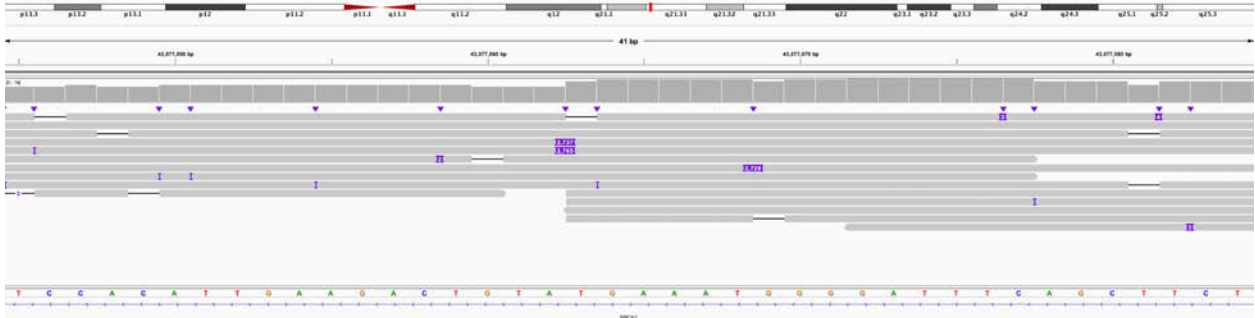

IGV view of known SVA insertion into *BRCA1*. IGV view is of chr17:43,077,045-43,077,084. This insertion was previously reported by Walsh and colleagues.<sup>2</sup>





Figure S17. S039 (*FMRI*), evaluation of repeat length and methylation status.

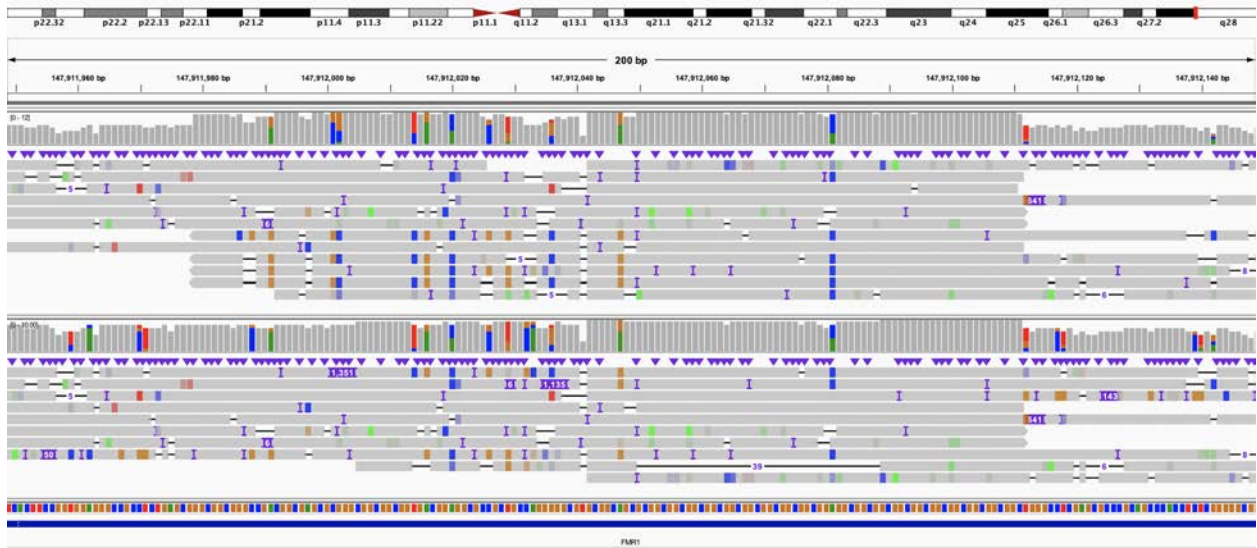

A. Screenshot of CGG repeat expansion in 5' UTR of *FMRI* from an individual known to carry an expansion. DNA was obtained from Coriell (Table S1). Top panel represents minimap2 run with default parameters; bottom panel is minimap2 run with parameters meant to reduce split reads. In the bottom panel, two reads with insert sizes of approximately 1,350 bp can be seen that are not present in the top panel. IGV view is chrX:147,911,949-147,912,149.

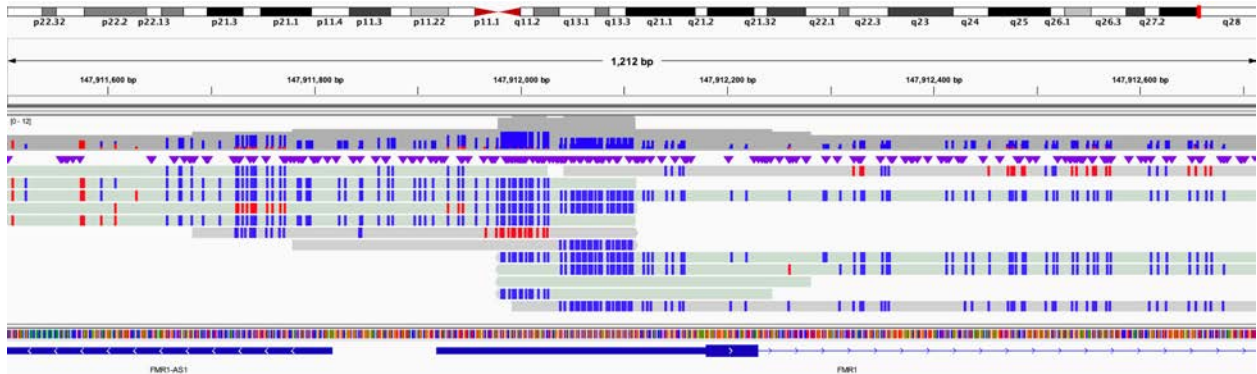

B. Methylation analysis of 5' UTR of *FMRI* reveals that the region around the CGG expansion is no longer methylated. The region shown is larger than in panel A. IGV view is chrX:147,911,502-147,912,719.





Figure S20. 04-01, 04-02, and 04-03 (*XYLT1*), evaluation of repeat length in family 04 from LaCroix *et al.* 2019.

3

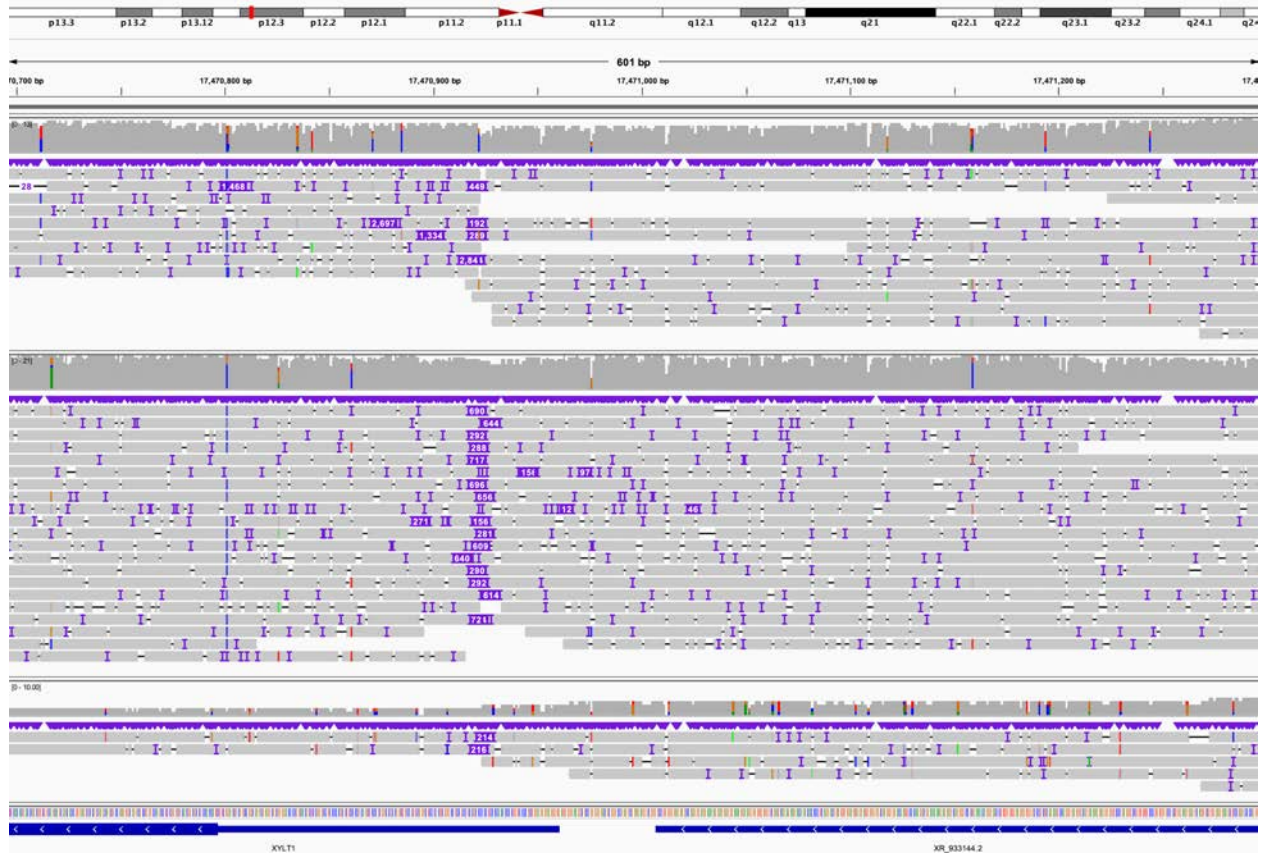

A. Screenshot of expansion in 5' UTR of *XYLT1* in family 04 from LaCroix *et al.*, 2019.<sup>32</sup> The proband (top) inherited a permutation allele from his mother and a *de novo* deletion from his father; the mother (middle) has a wild-type allele and permutation allele, while the father has two wild-type alleles (bottom).

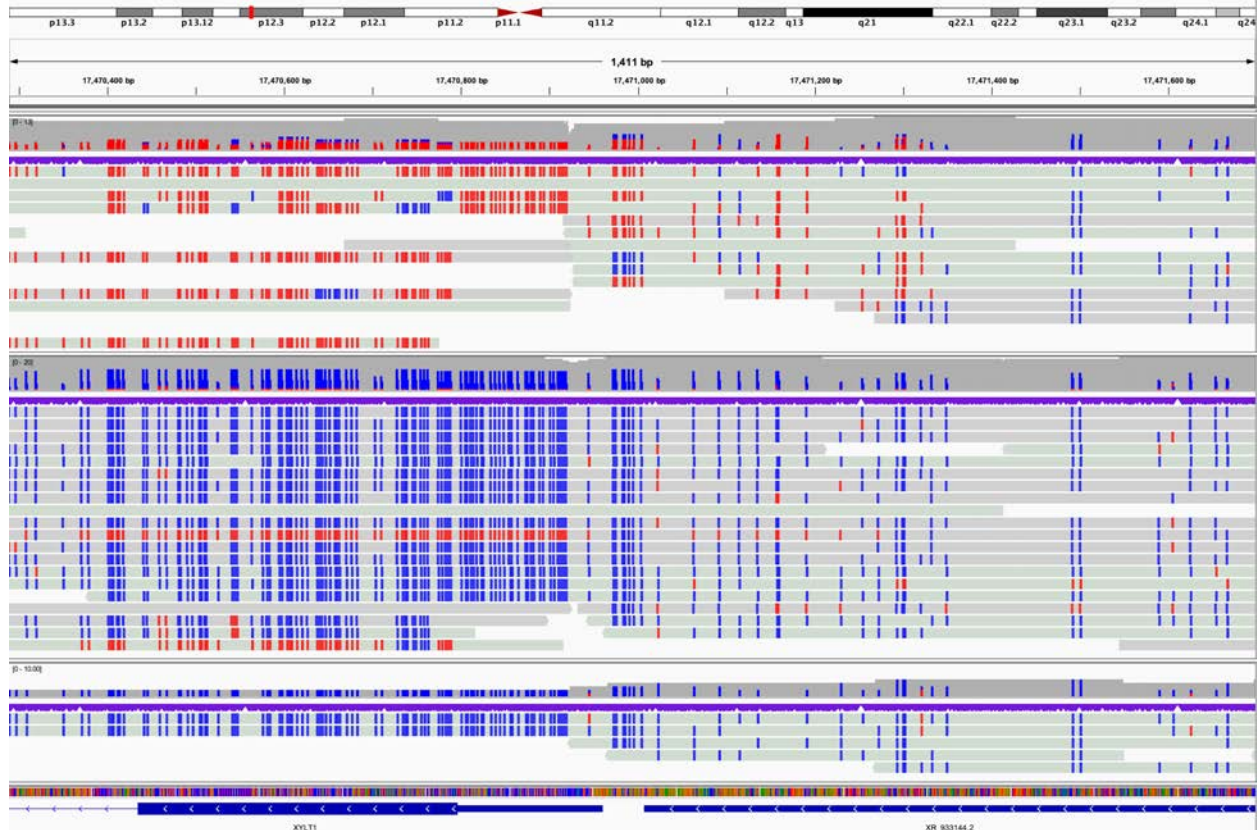

**B.** Methylation was called and assigned to each read and shows that all reads in the proband are methylated (red), while most in the mother are unmethylated (blue), and both in the father are unmethylated. IGV view from chr16:17,470,696-17,471,299. B. IGV view from chr16:17,470,288-17,471,705.



Figure S21. 06-01, 06-02, and 06-03 (*XYLT1*), evaluation of repeat length in family 06 from LaCroix *et al.* 2019.

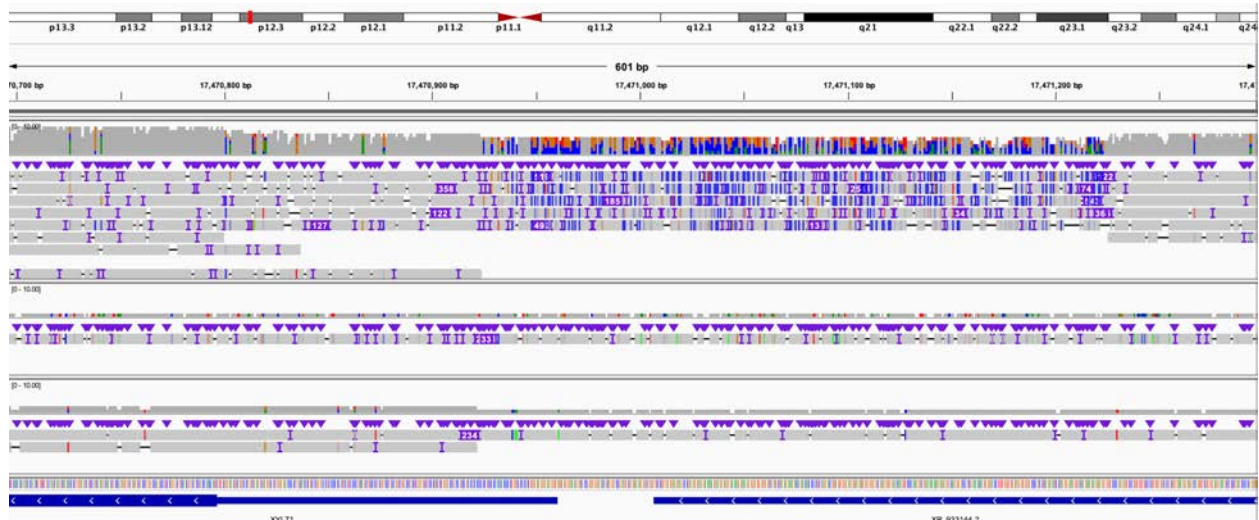

A. IGV view of proband (top), mother (middle), and father (bottom) from family 06 from LaCroix *et al.*, 2019.<sup>33</sup> Only a single read was recovered spanning the GGC repeat in both the mother and father. IGV view is from chr16:17,470,696-17,471,299.

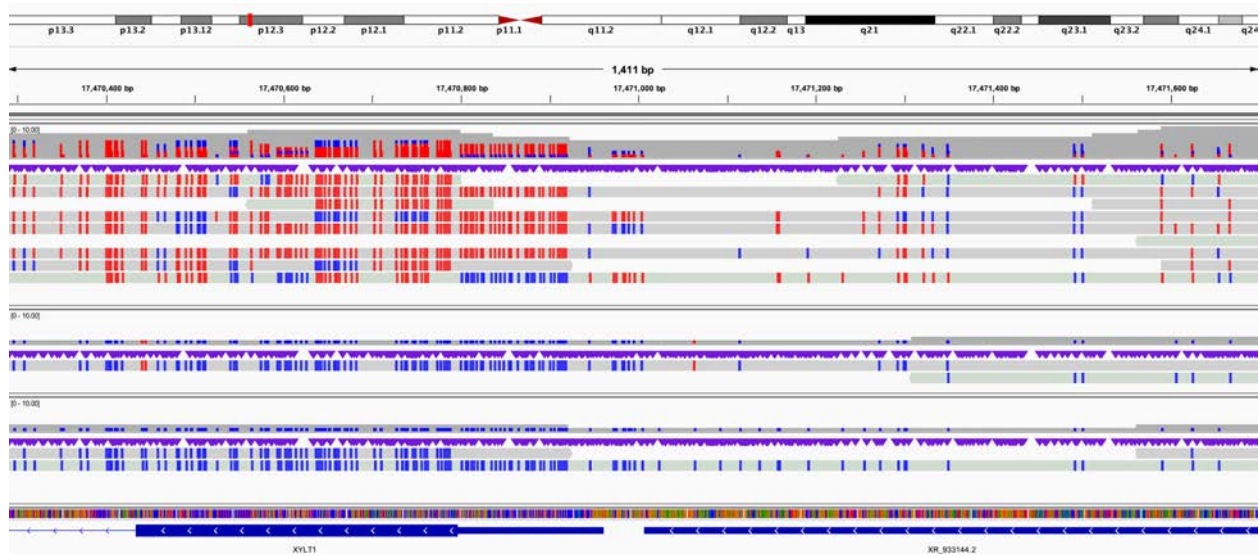

B. IGV view of reads converted to show methylation status; order is the same as in A but the view is slightly larger to show methylation of the first exon of *XYLT1* in the proband. IGV view from chr16:17,470,288-17,471,705.

Figure S22. S071, Phasing of inherited and *de novo* variants in METTL5.

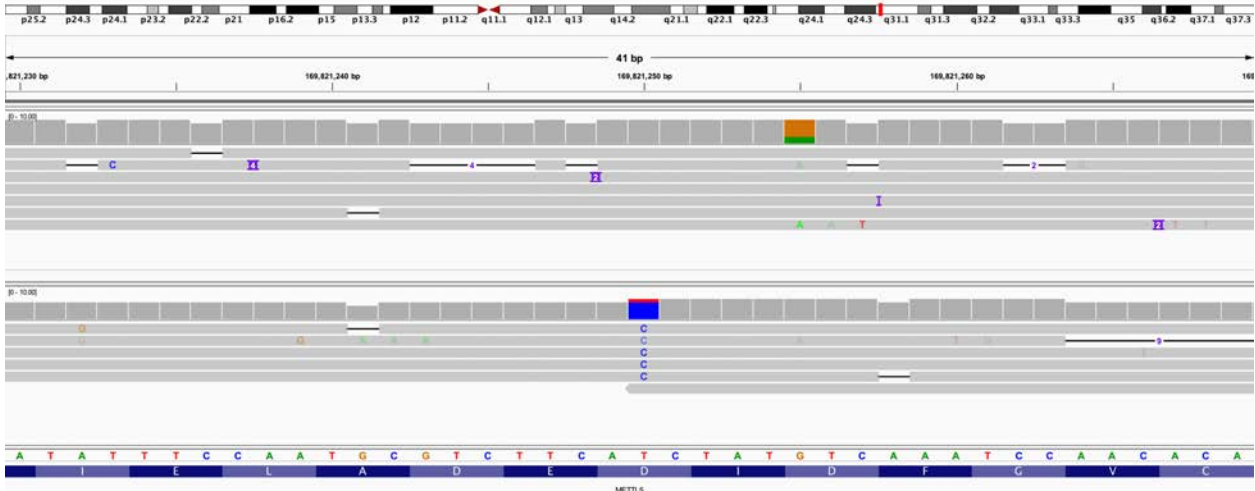

A. View of paternally inherited c.248 A>G (p.D83G), IGV view is chr2:169,821,230-169,821,269. Haplotype 1 is the top track, haplotype 2 is the bottom.

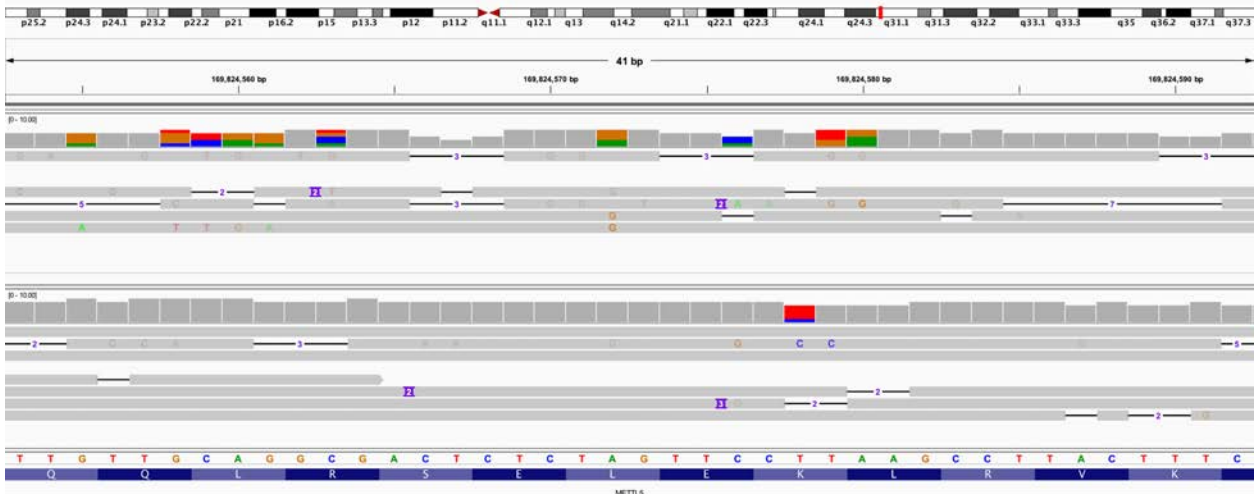

B. View of *de novo* c.267 T>C (p.L9P), IGV view is chr2:169,824,553-169,824,592. Haplotype 1 is the top track, haplotype 2 is the bottom.





Figure S24. S014, three noncontiguous deletions of chromosome 6 identified by CMA.

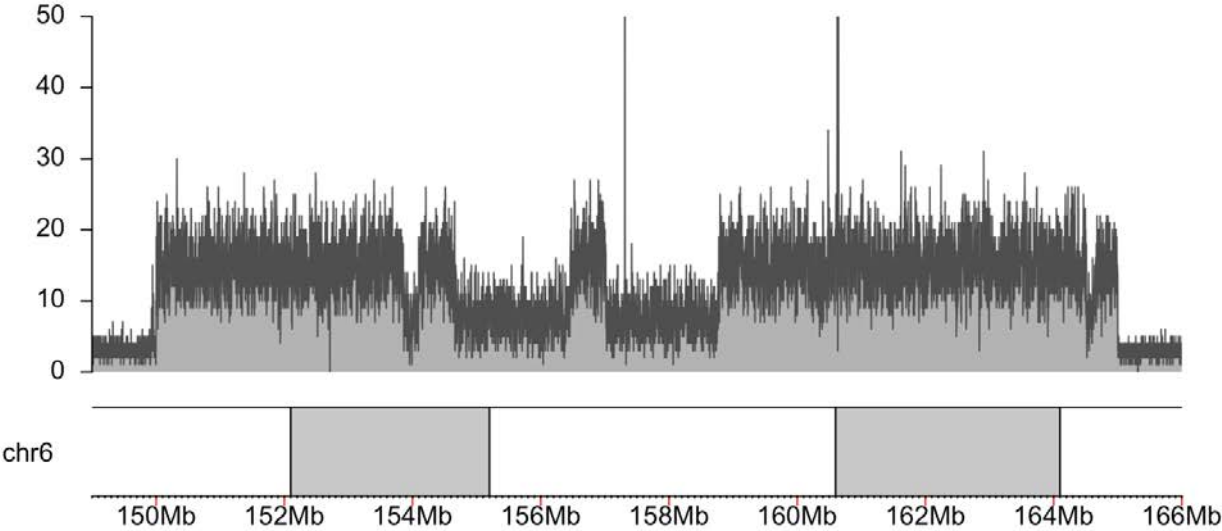

A. Coverage of chromosome 6 target region.

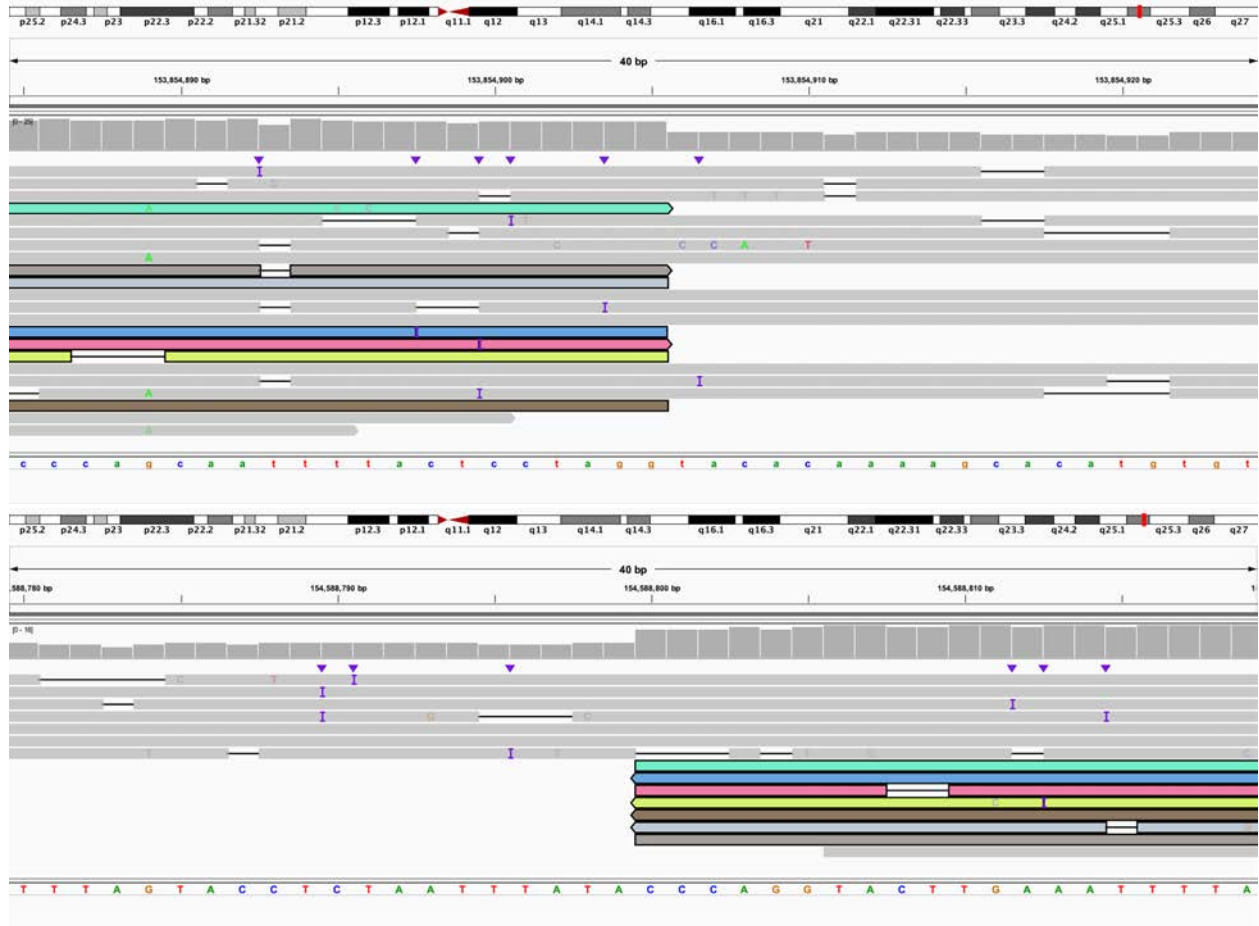

**B:** 3' end of fragment A (IGV: chr6:153,854,885-153,854,924) connects to 5' end of fragment E (IGV: chr6:154,588,780-154,588,819).

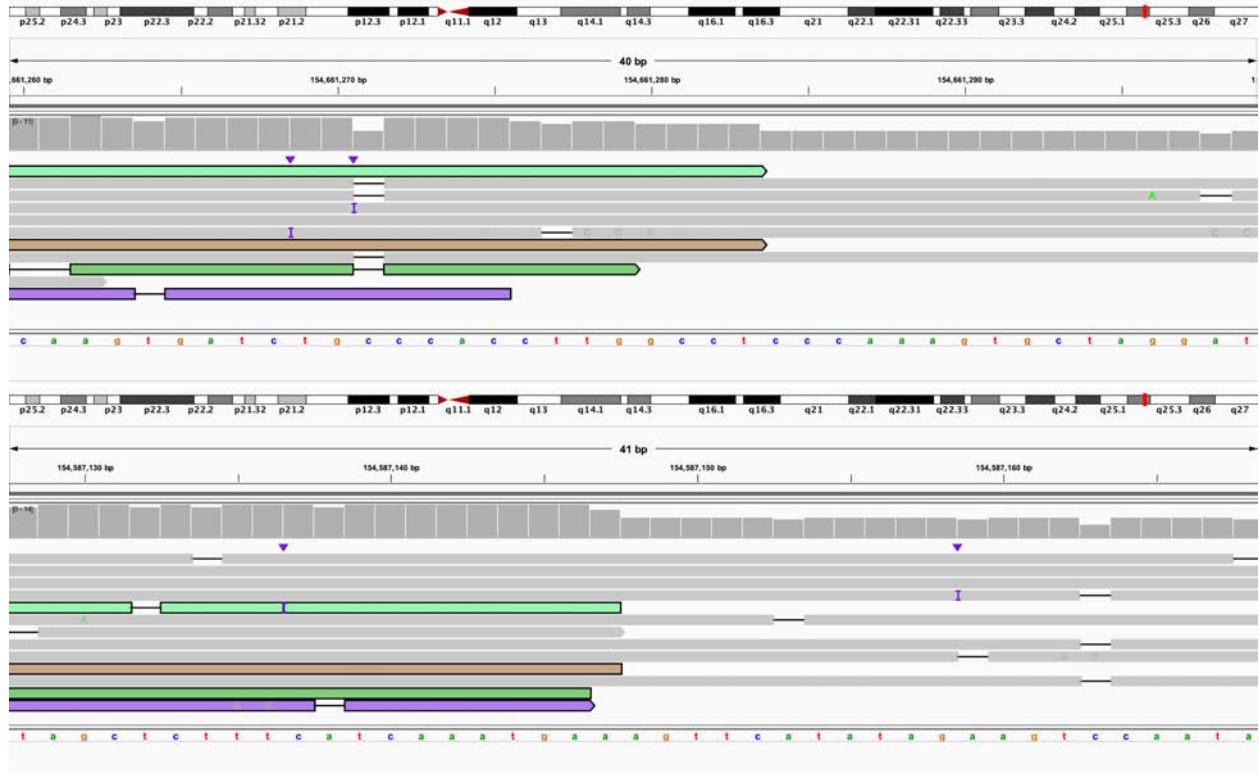

**C:** 3' end of fragment E (IGV: chr6:154,661,260-154,661,299) connects to 3' end of fragment C (IGV: chr6:154,587,128-154,587,168).

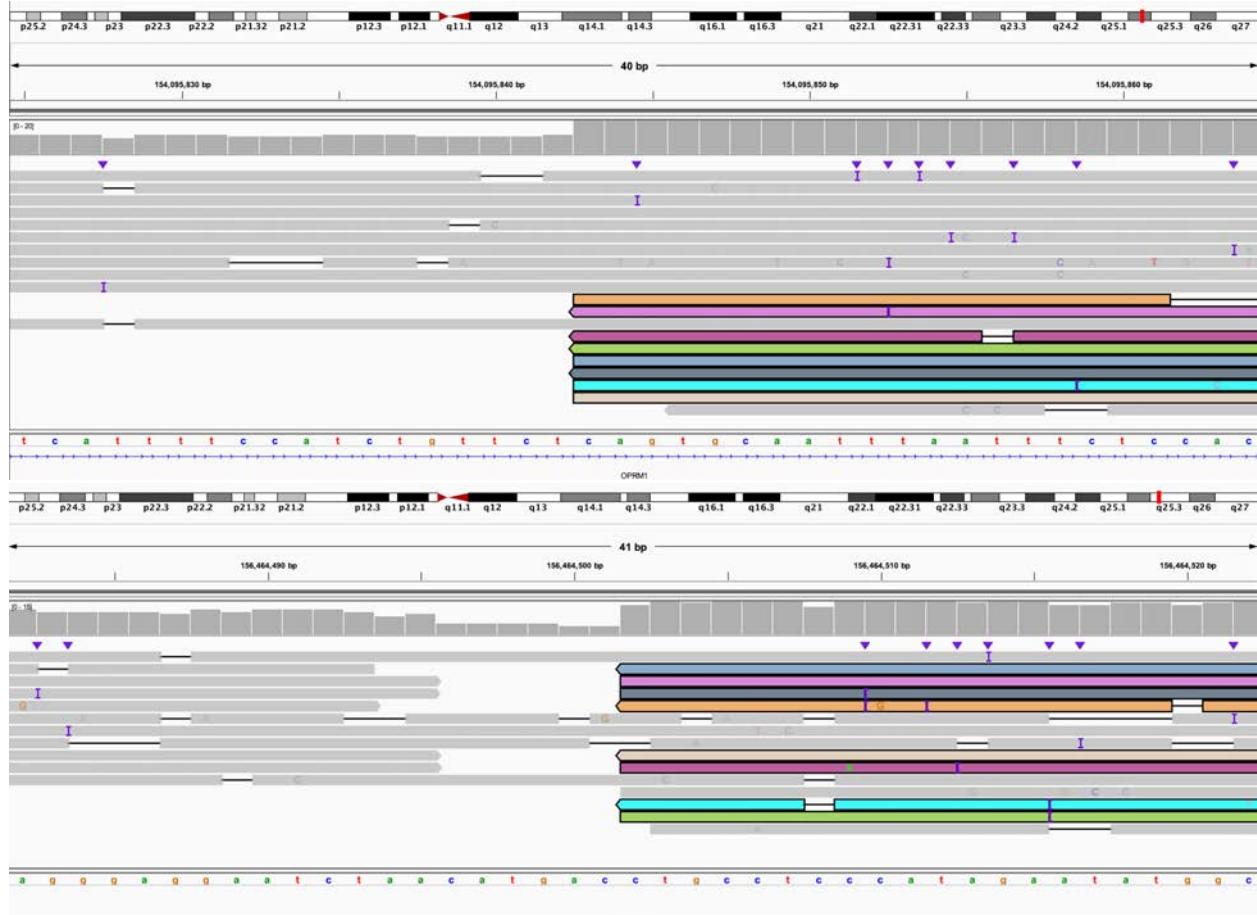

**D:** 5' end of fragment C bisects *OPRM1* (IGV: chr6:154,095,825-154,095,864) and connects to 5' end of fragment I (IGV: chr6:156,464,482-156,464,522).

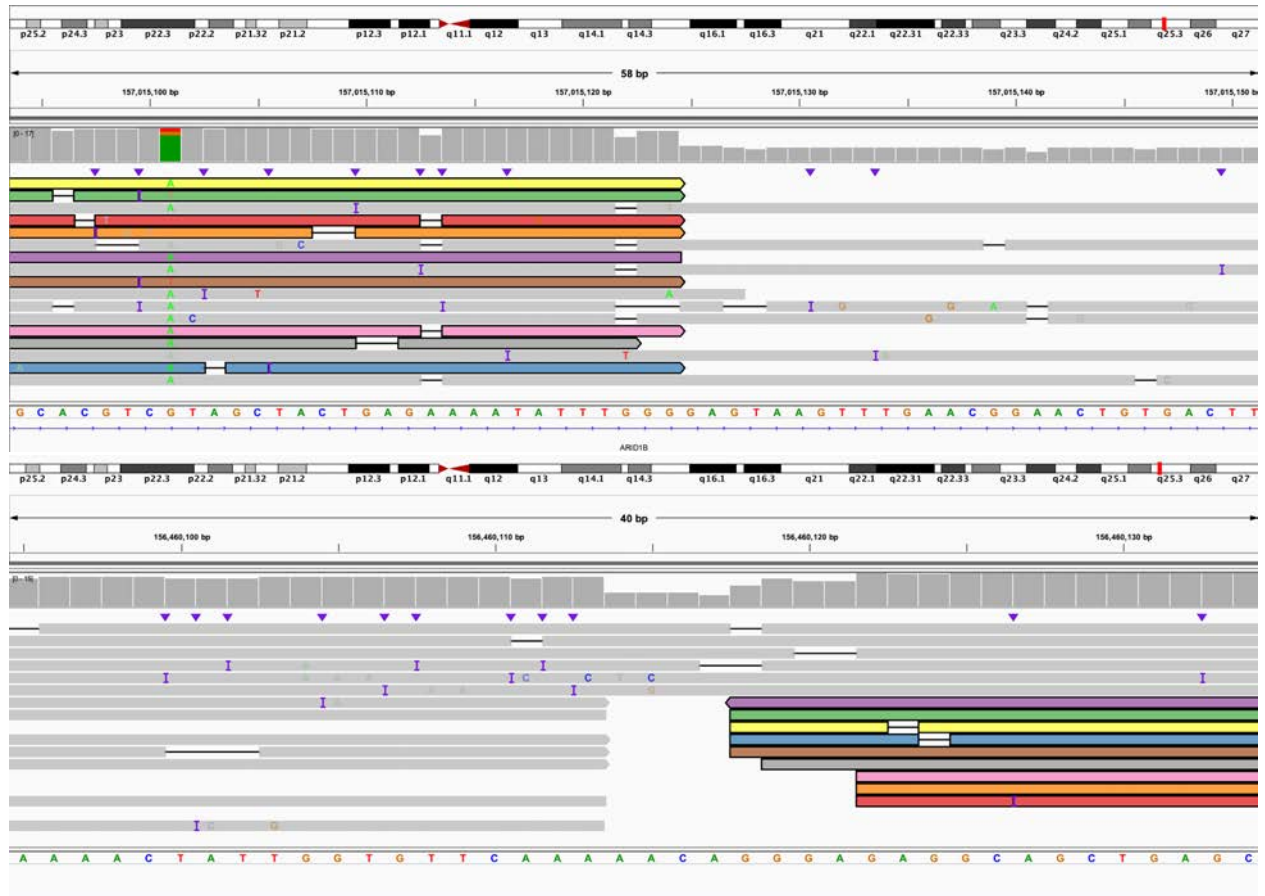

**E:** 3' end of fragment I bisects *ARID1B* (IGV: chr6:157,015,094-157,015,151) and connects to 5' end of fragment H (IGV: chr6:156,460,095-156,460,134).

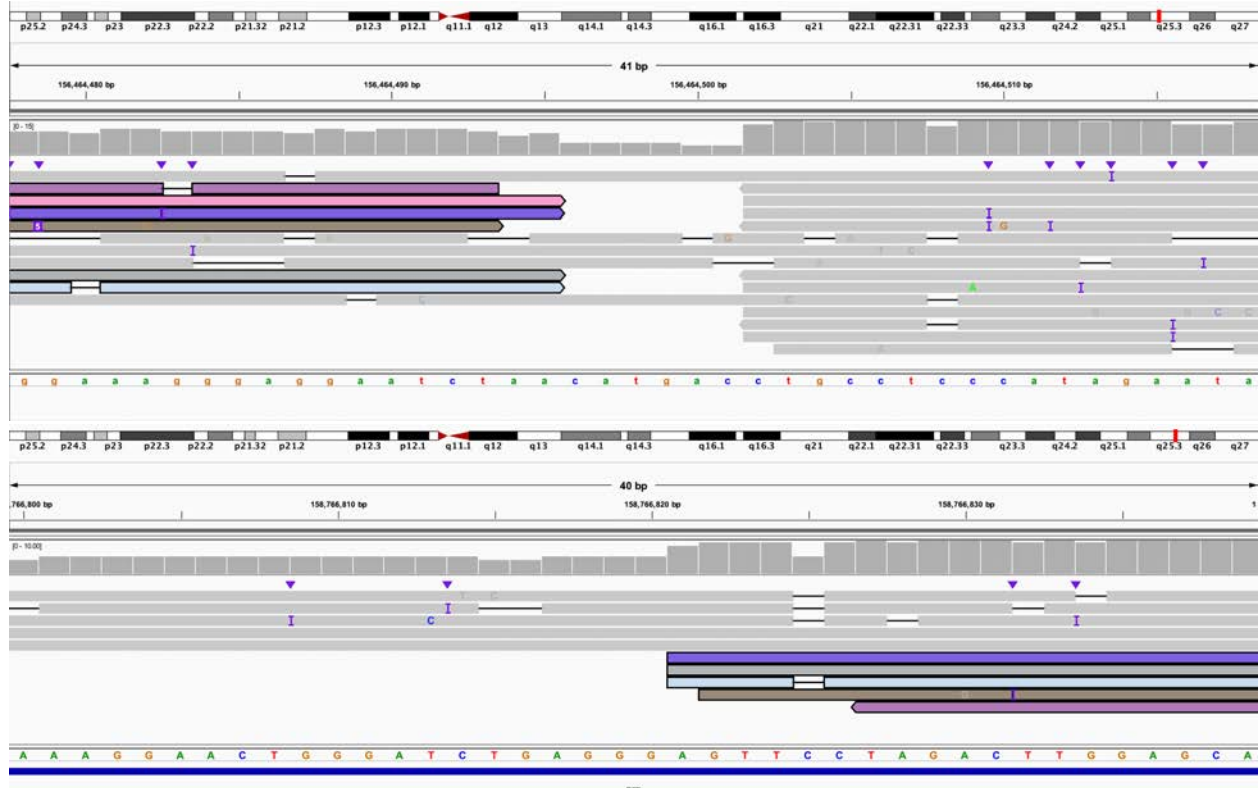

**F:** 3' end of fragment H (IGV: chr6:156,464,478-156,464,518) connects to 5' end of fragment K and bisects *EZR* (IGV: chr6:158,766,800-158,766,839).

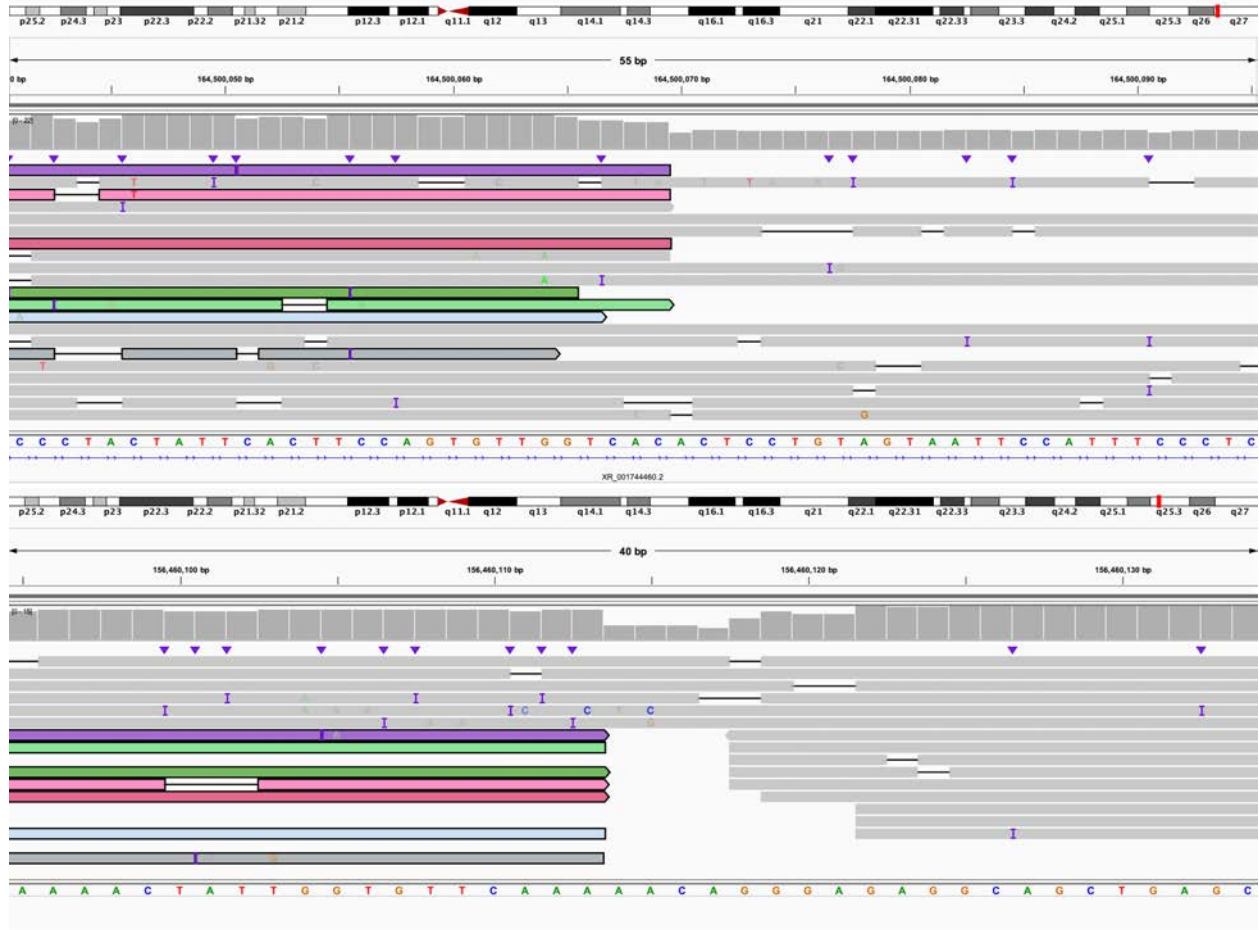

**G:** 3' end of fragment K bisects *XR\_001744460.2* (IGV: chr6:164,500,041-164,500,095) and connects to 3' end of fragment G (IGV: chr6:156,460,095-156,460,134).



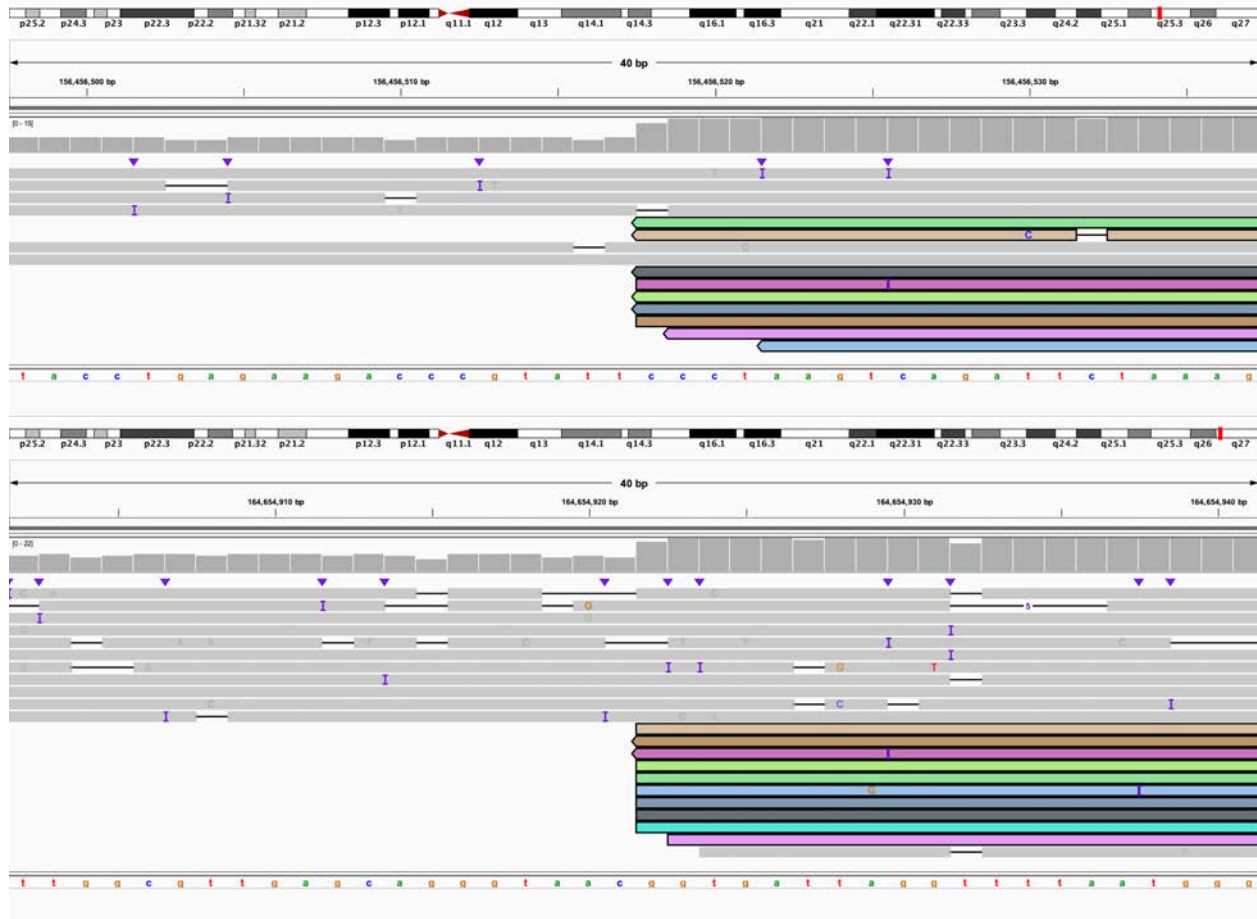

**H:** 5' end of fragment G (IGV: chr6:156,456,498-156,456,537) connects to 5' end of fragment M (IGV: chr6:164,654,902-164,654,941).

**Figure S25. S020, individual with three deletions identified on array and multiple rearrangements on karyotype.**

In panels J-AG Nanopore data is the top track and PacBio HiFi data is the bottom track.

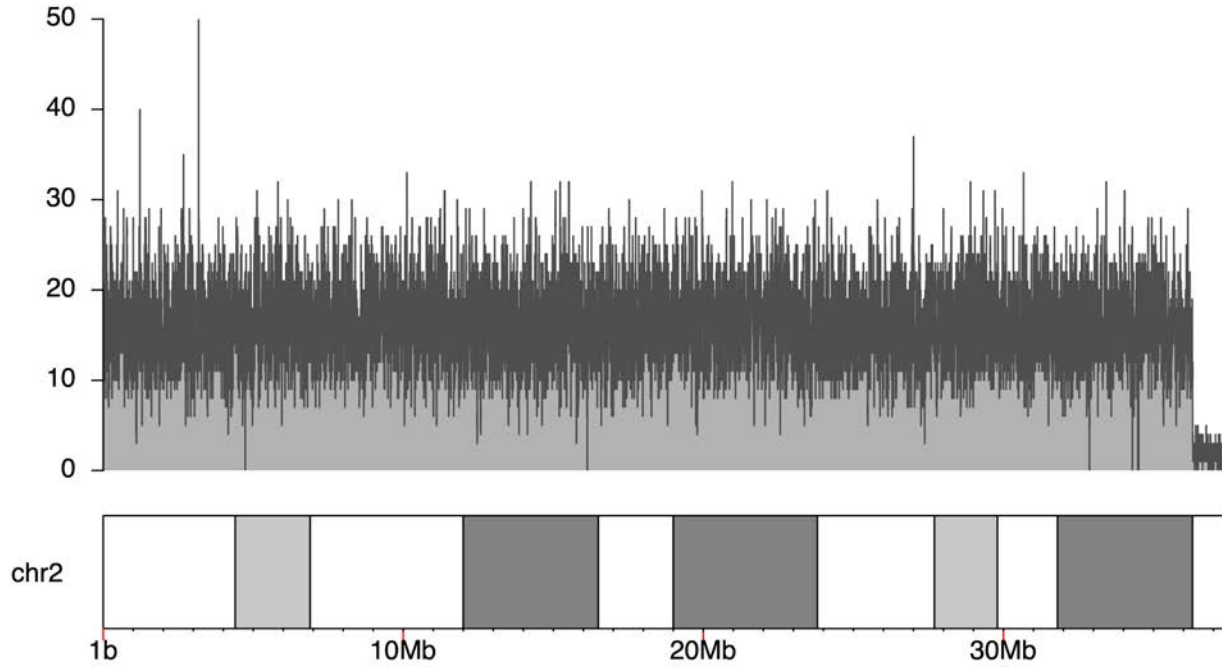

**A:** Coverage of chromosome 2 target region from readfish experiment 1.

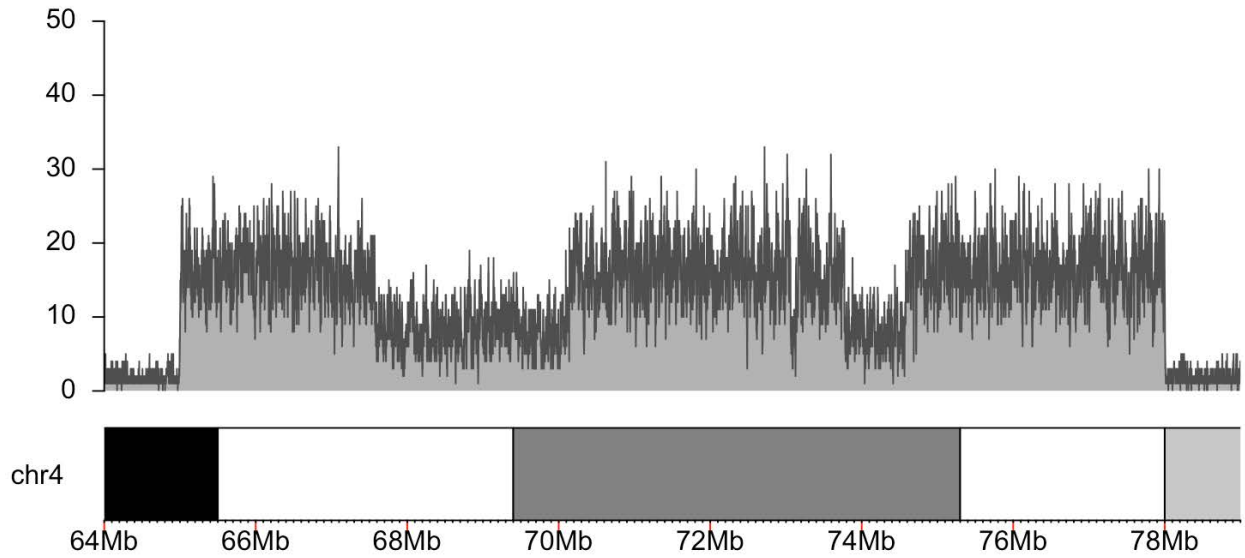

**B:** Coverage of chromosome 4 target region from readfish experiment 1.

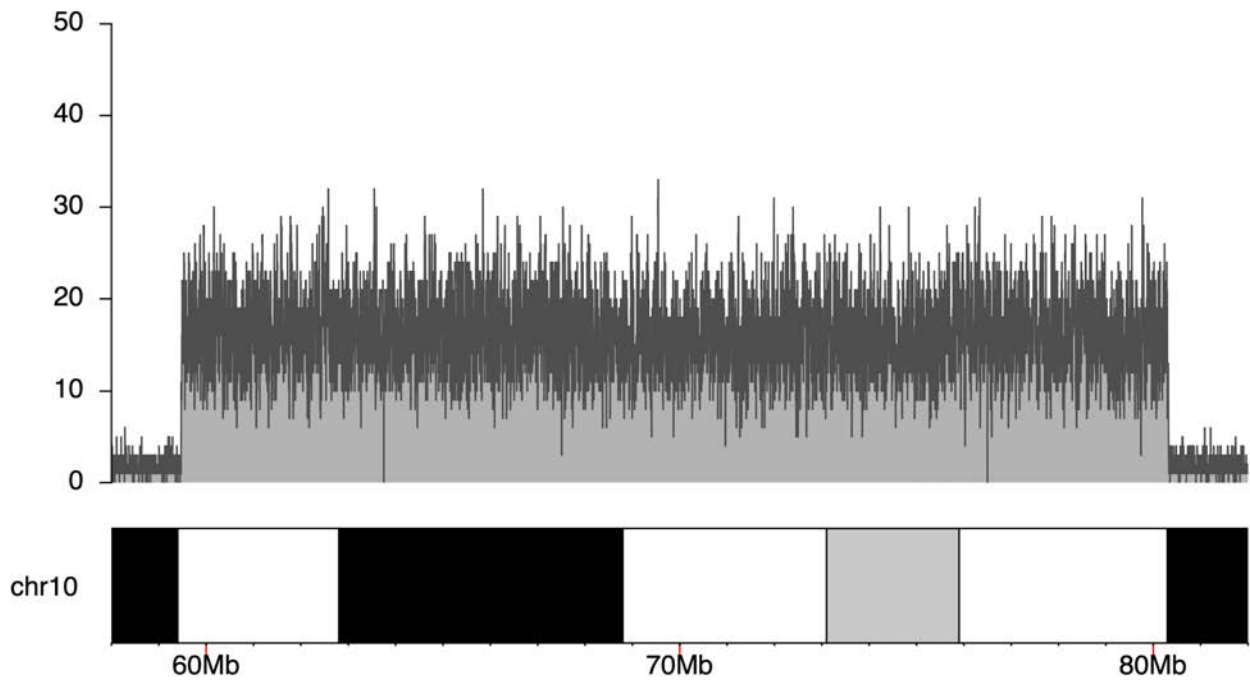

**C:** Coverage of chromosome 10 target region from readfish experiment 1.

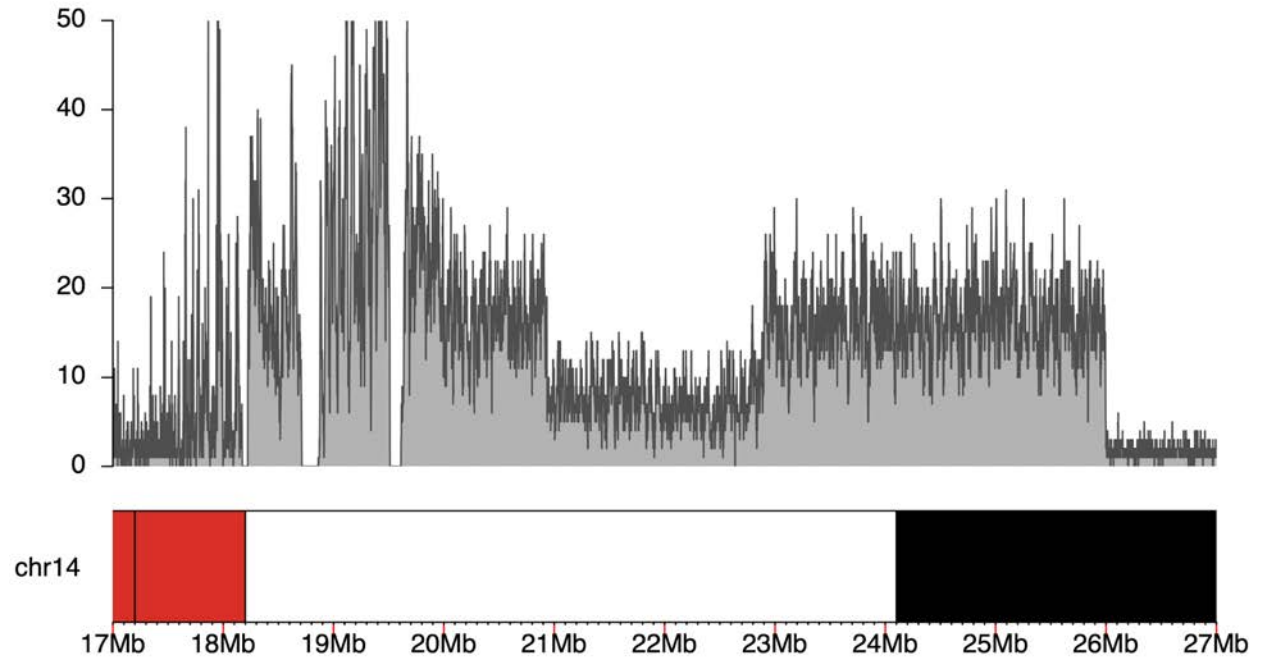

**D:** Coverage of chromosome 14 target region from readfish experiment 1.

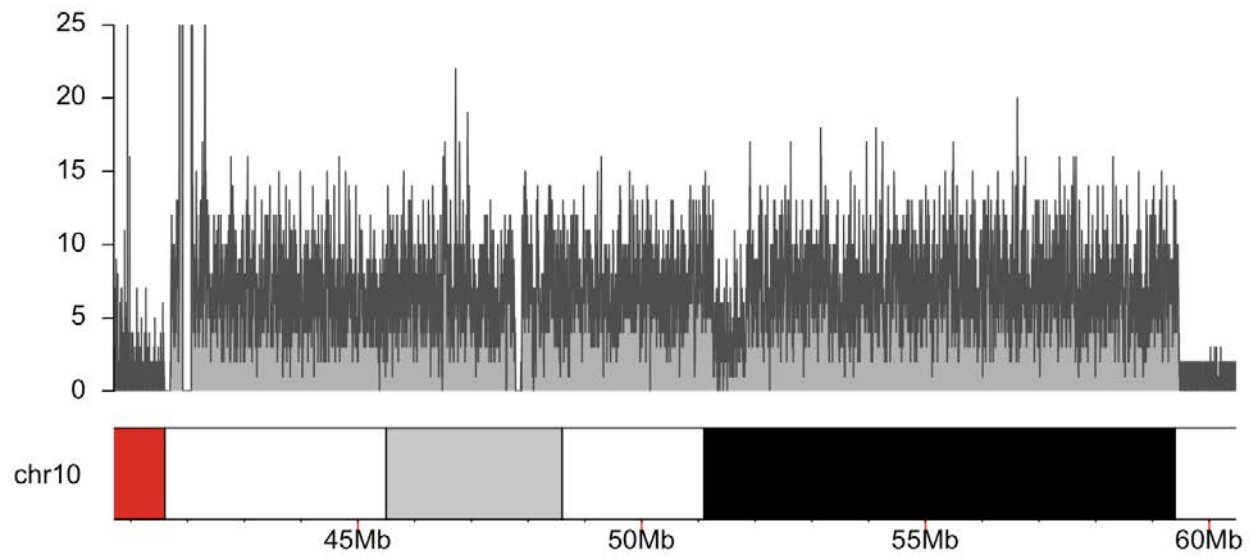

**E:** Coverage of chromosome 10 target region from readfish experiment 2.

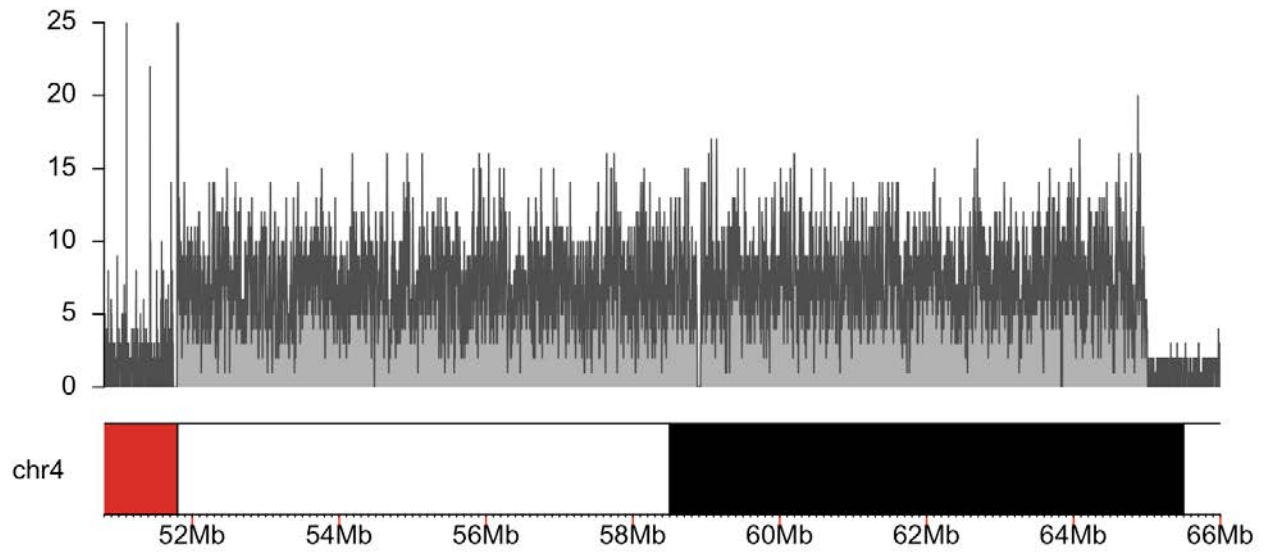

**F:** Coverage of first chromosome 4 target region from readfish experiment 2.

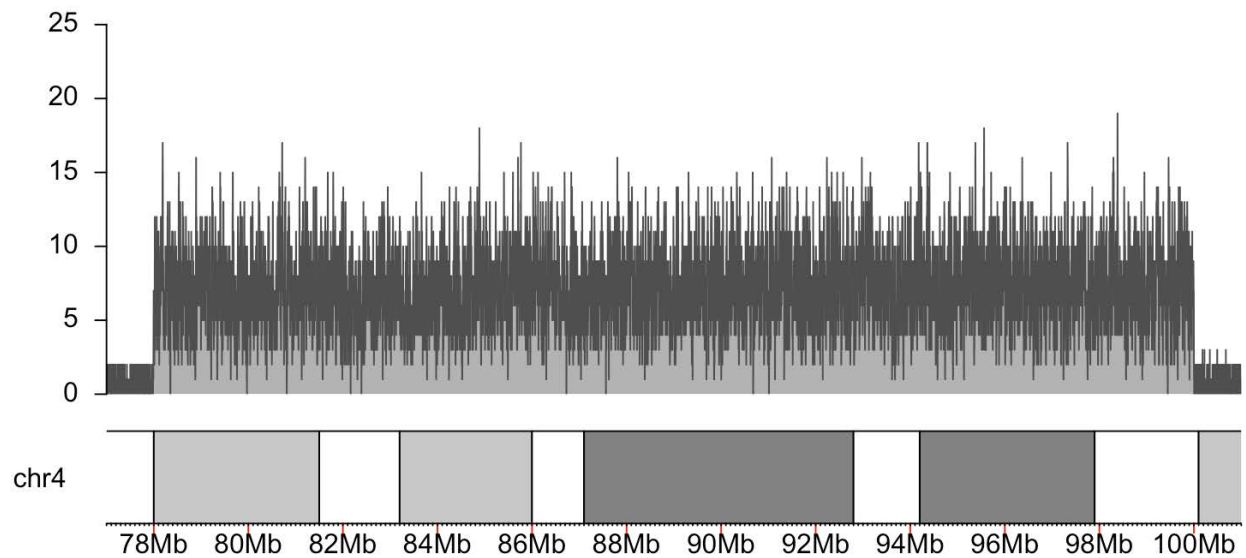

**G:** Coverage of second chromosome 4 target region from readfish experiment 2.

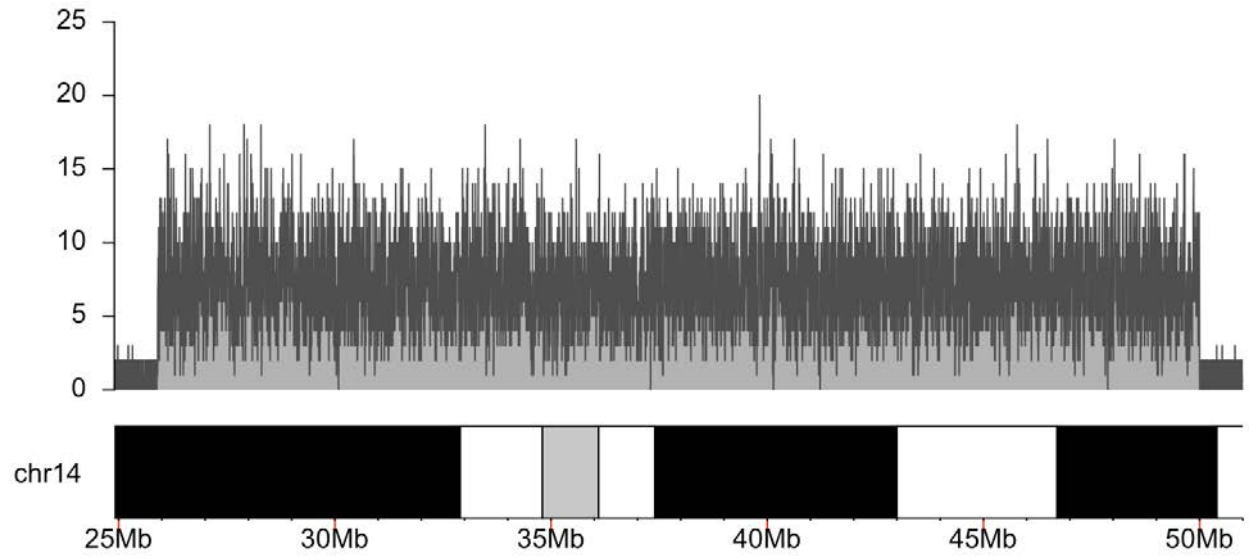

**H:** Coverage of chromosome 14 target region from readfish experiment 2.

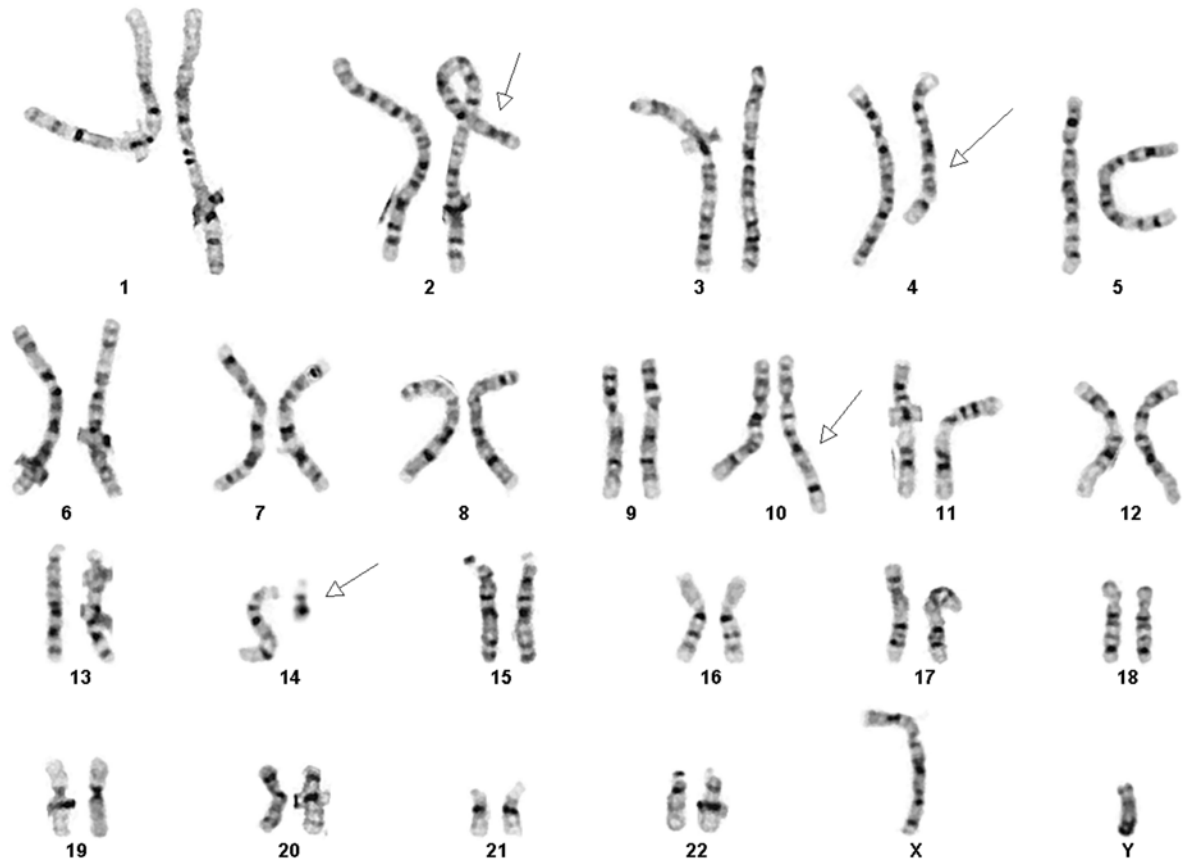

I: Karyotype of the case, arrows point to abnormal chromosomes.

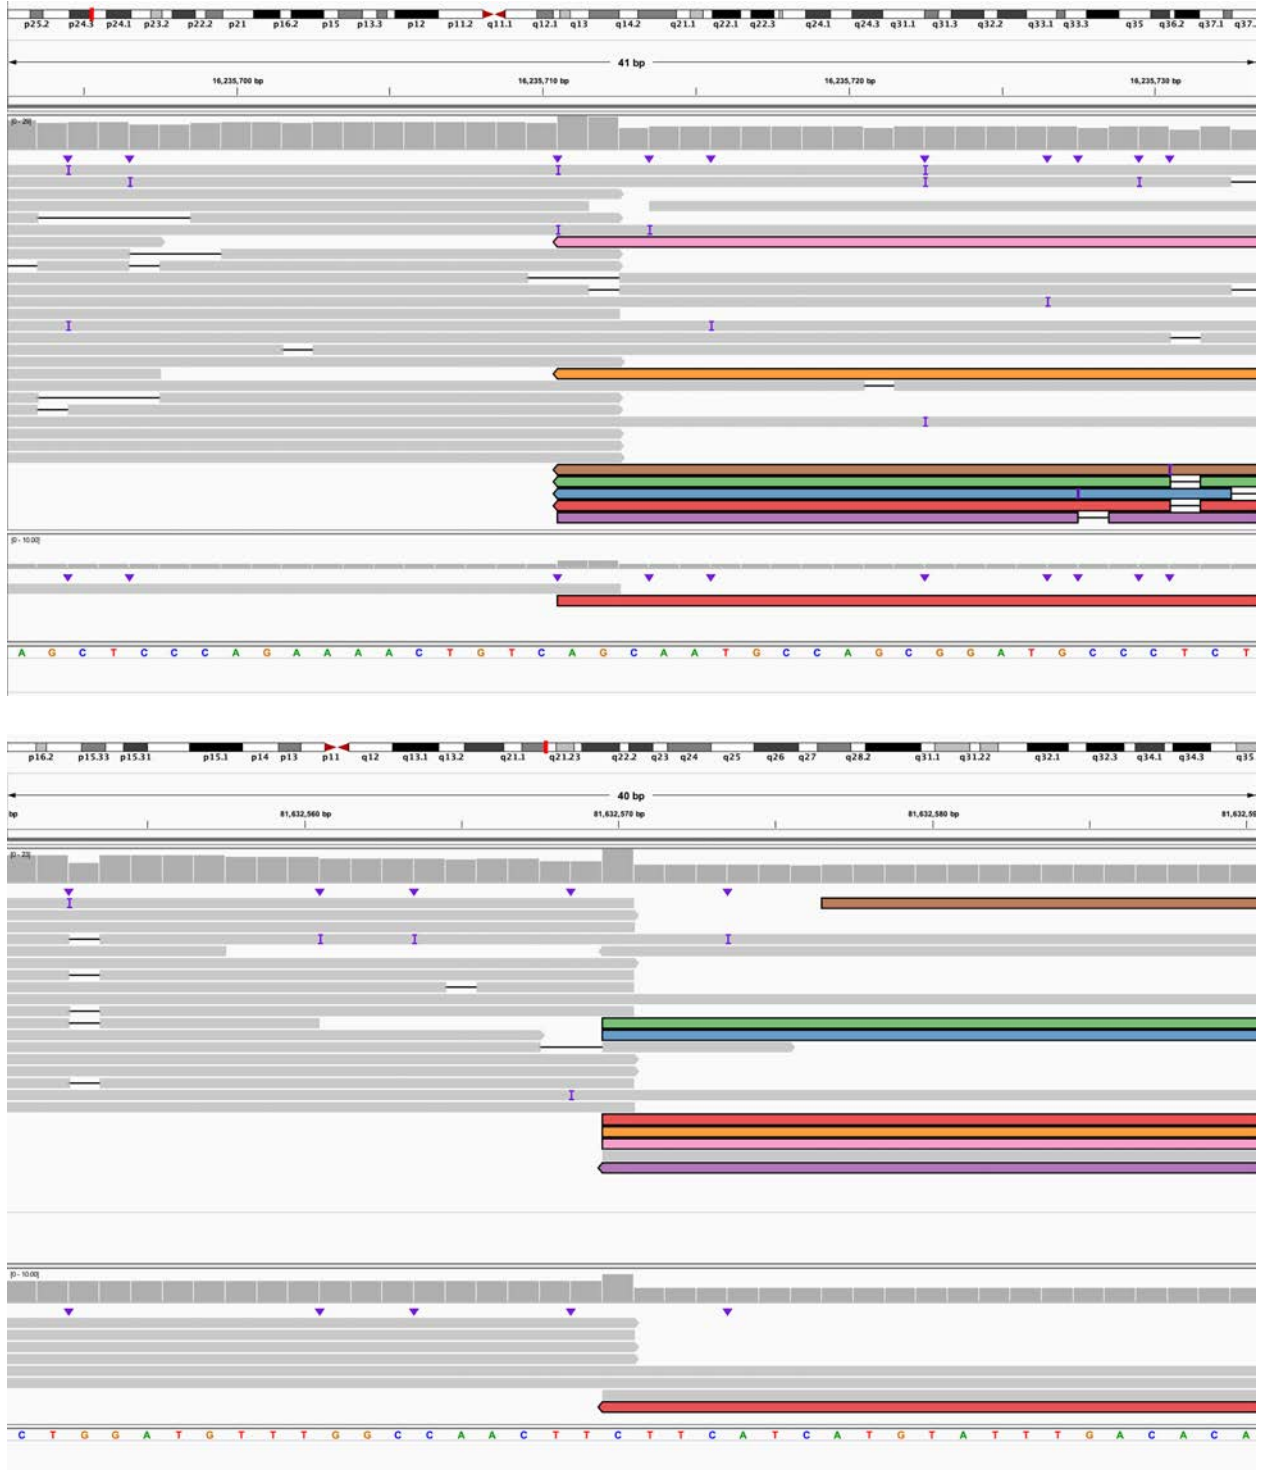

**J.** The 5' end of 2:C (IGV: chr2:16,235,693-16,235,733) is connected to the 5' end of 4:N (IGV: chr4:81,632,551-81,632,590). This is the entirety of derivative chromosome 2.



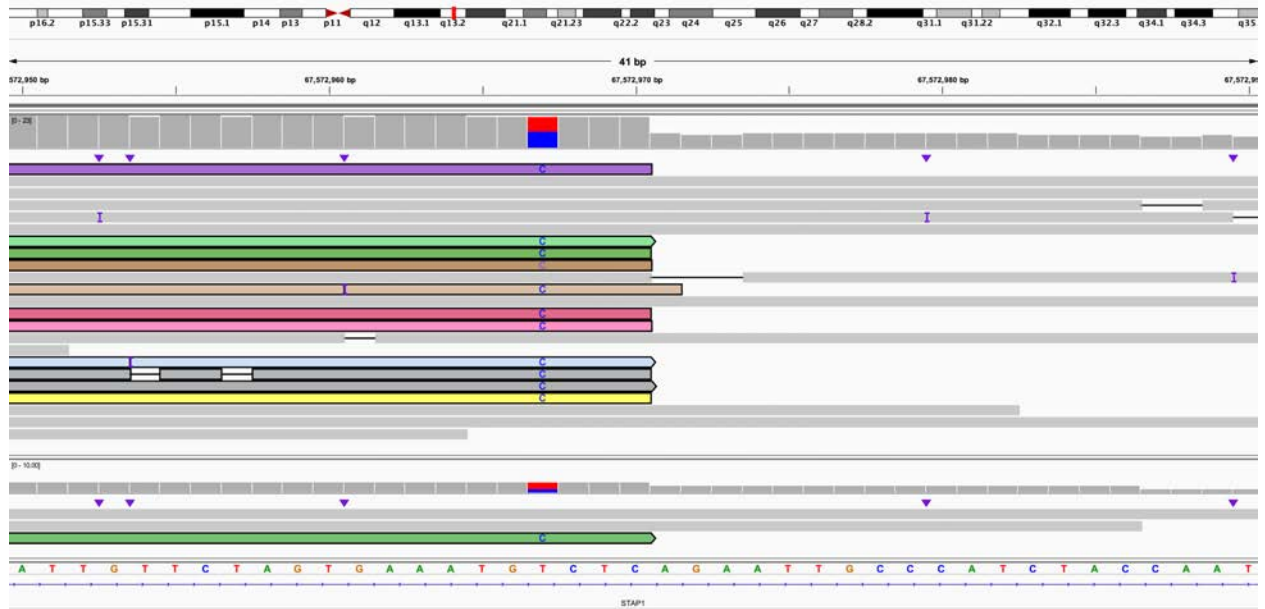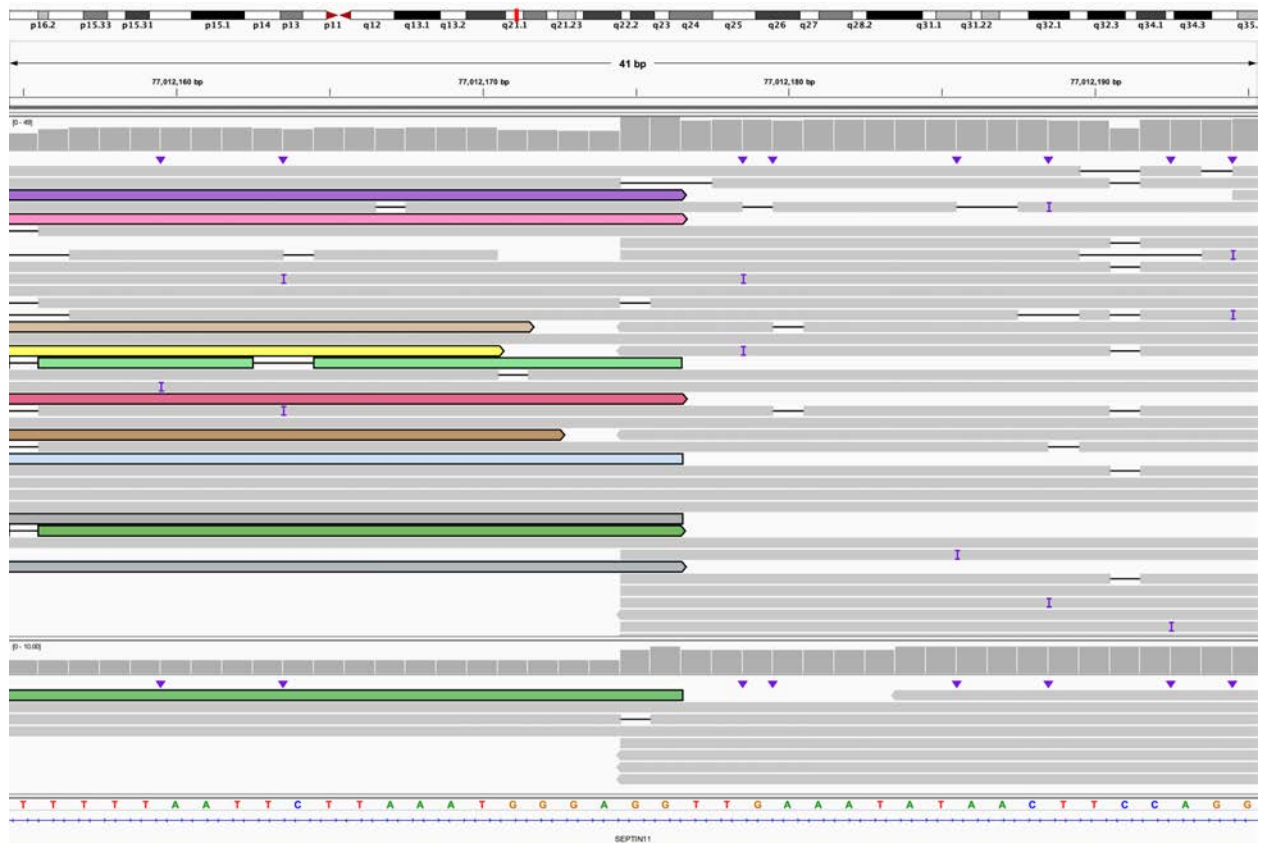

**K.** The 3' end of 4:A bisects *STAP1* (IGV: chr4:67,572,950-67,572,990) and is connected to the 3' end of 4:K and bisects *SEPTIN1* (IGV: chr4:77,012,155-77,012,195). This is the beginning of derivative chromosome 4.

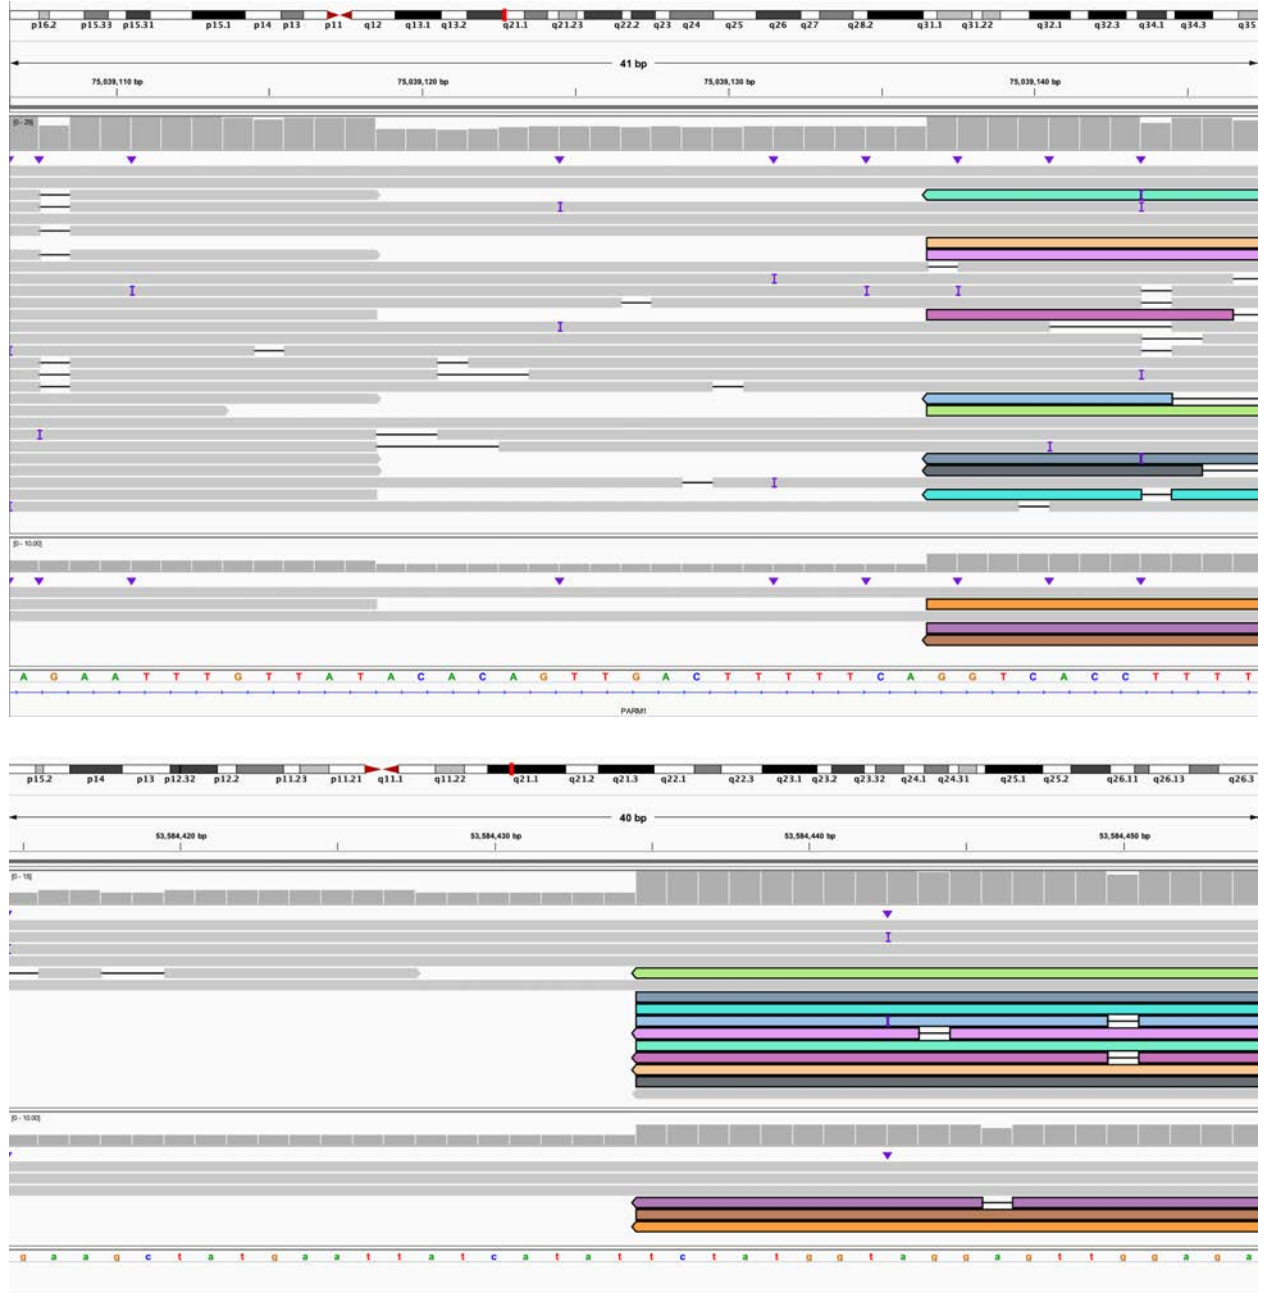

L. The 5' end of 4:K bisects *PARM1* (IGV: chr4:75,039,107-75,039,147) and is connected to the 5' end of 10:I (IGV: chr10:53,584,415-53,584,454). This is within derivative chromosome 4.

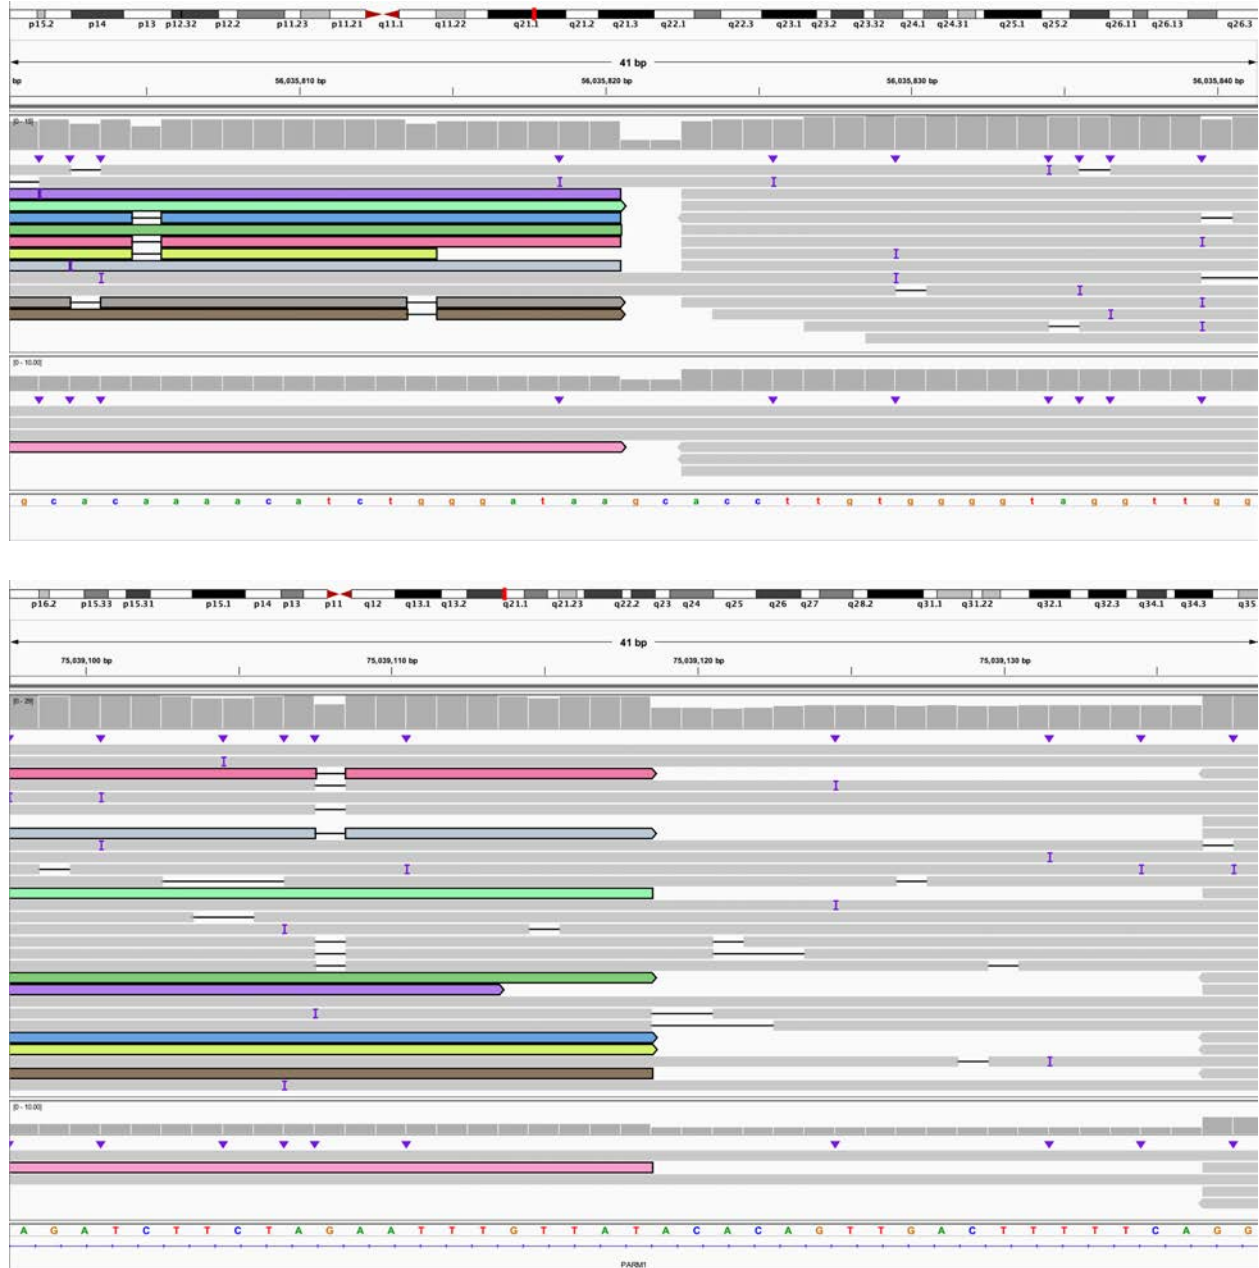

**M.** The 3' end of 10:I (IGV: chr10:56,035,801-56,035,841) is connected to the 3' end of 4:J and bisects *PARM1* (IGV: chr4:75,039,098-75,039,138). This is within derivative chromosome 4.

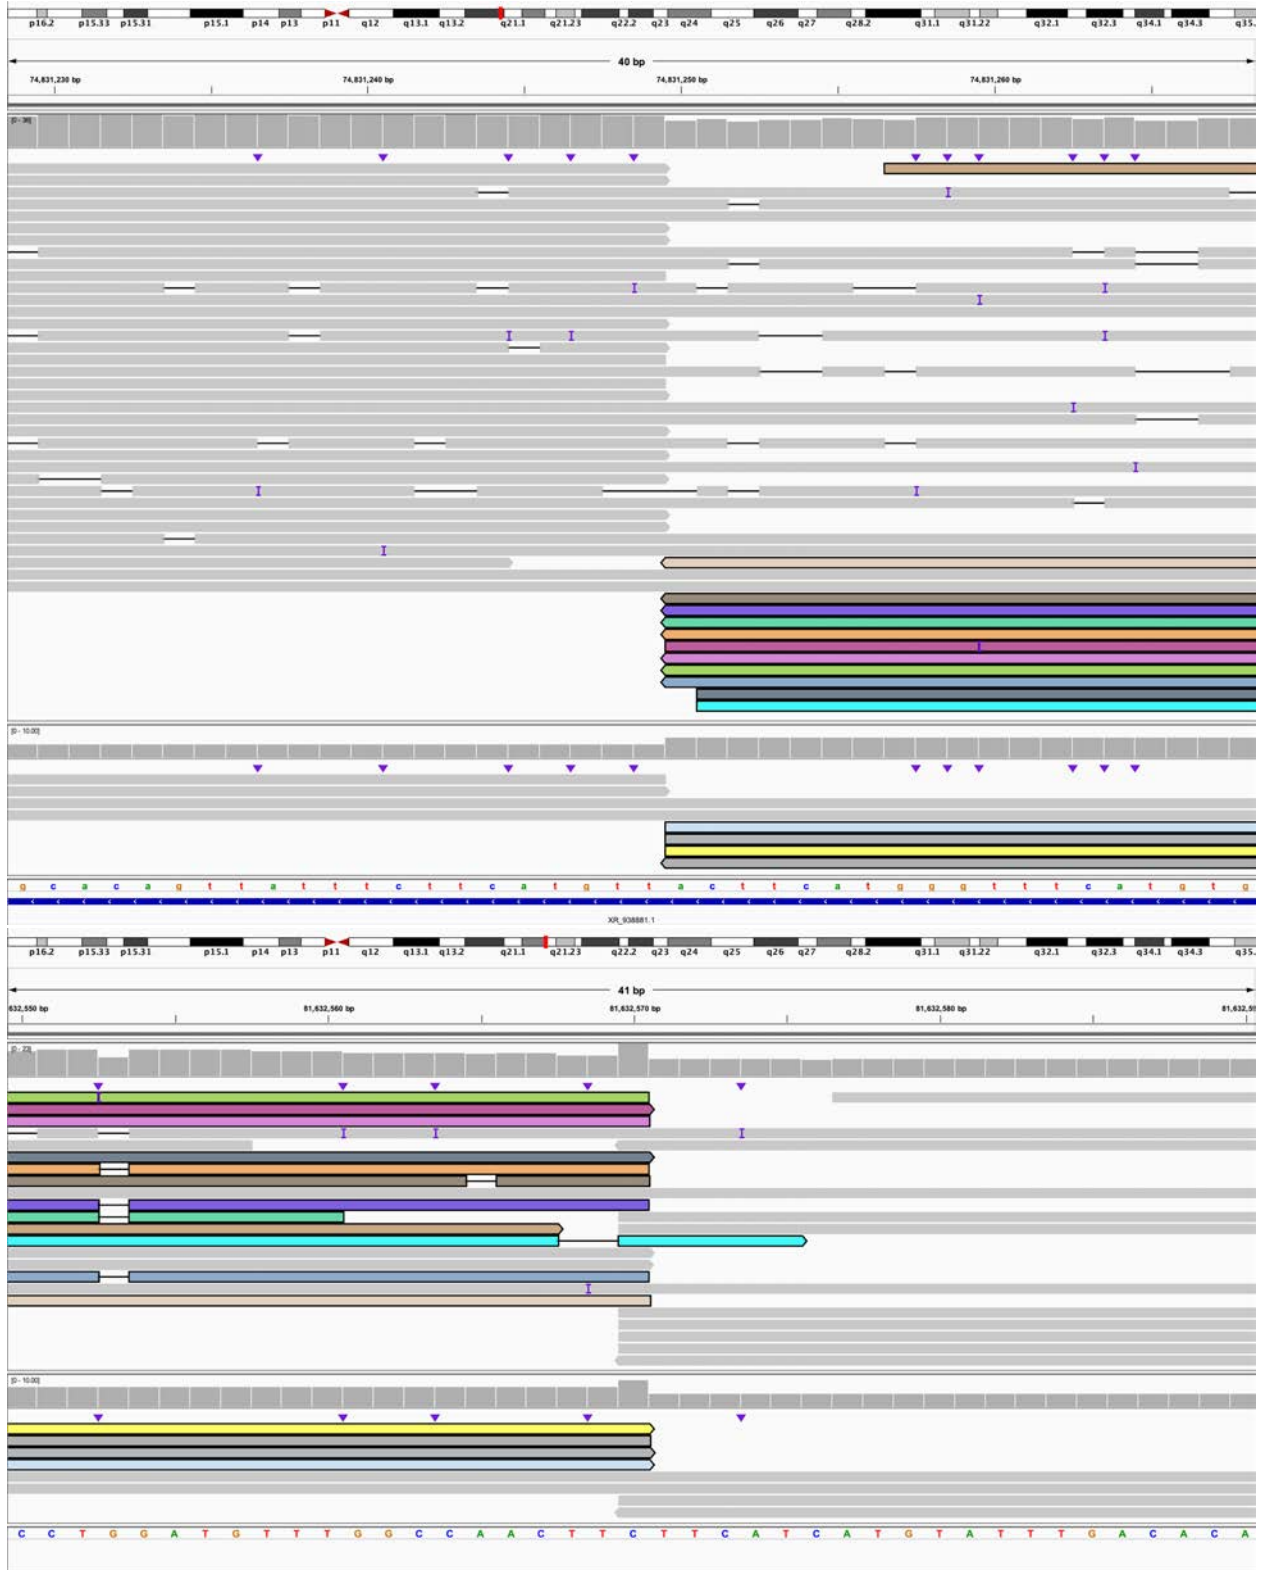

N. The 5' end of 4:J bisects *XR\_93881.1* (IGV: chr4:74,831,229-74,831,268) and is connected to the 3' end of 4:M (IGV: chr4:81,632,550-81,632,590). This is within derivative chromosome 4.

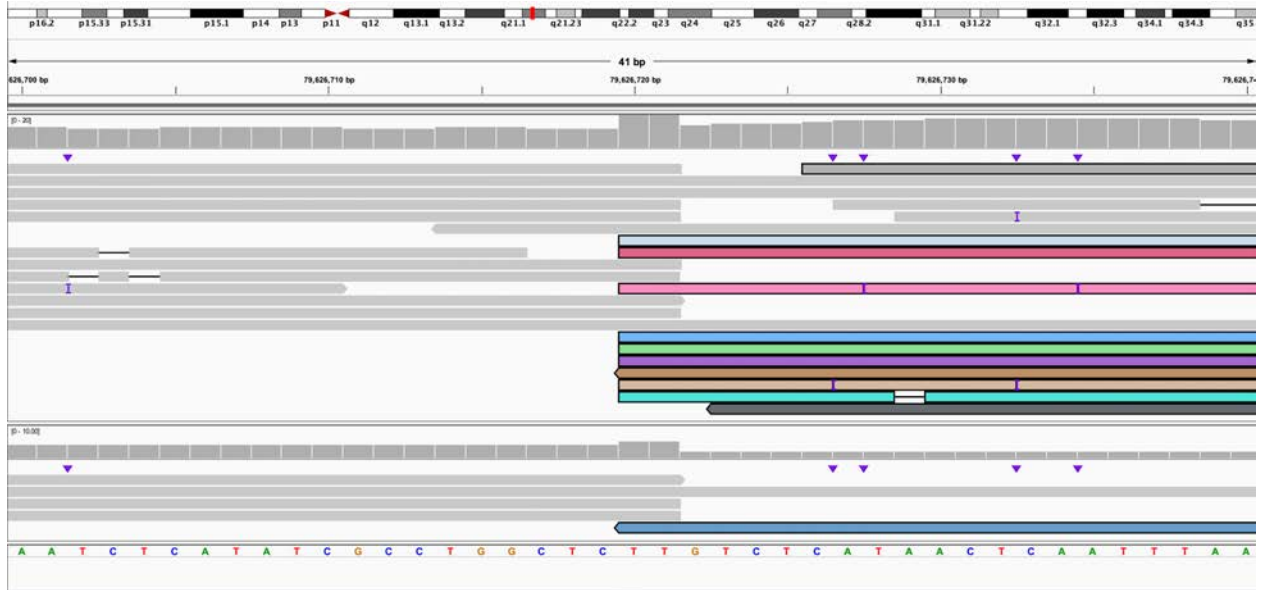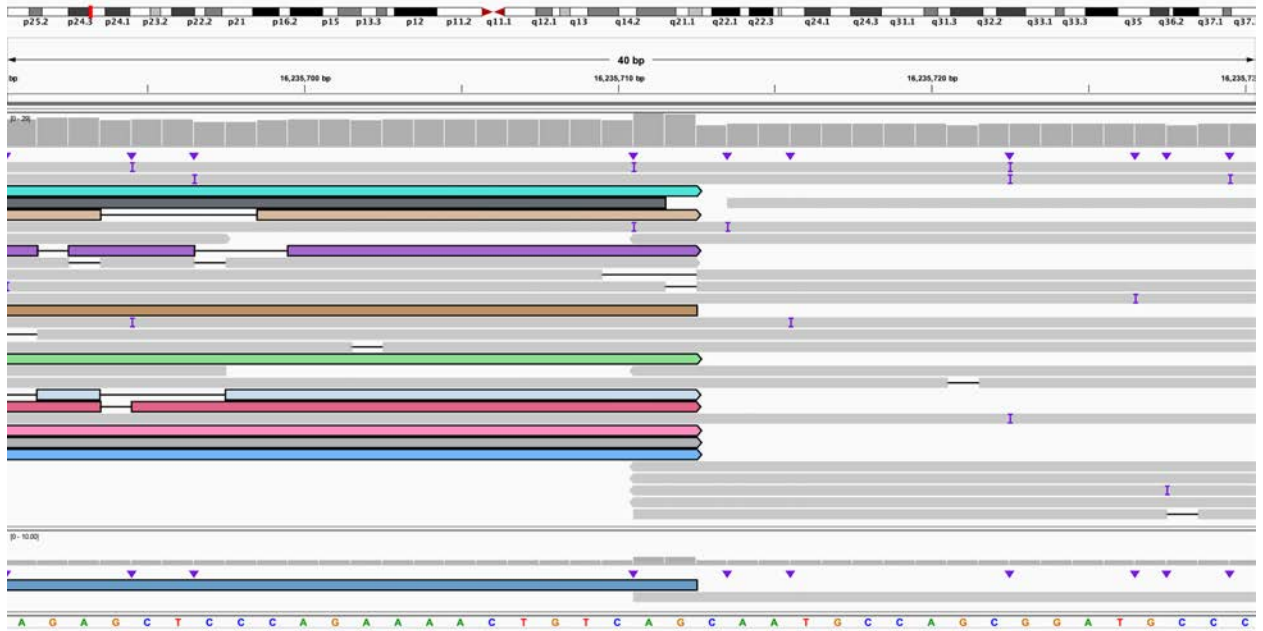

**O.** The 5' end of 4:M (IGV: chr4:79,626,700-79,626,740) is connected to the 3' end of 2:B (IGV: chr2:16,235,691-16,235,730). This is within derivative chromosome 4.

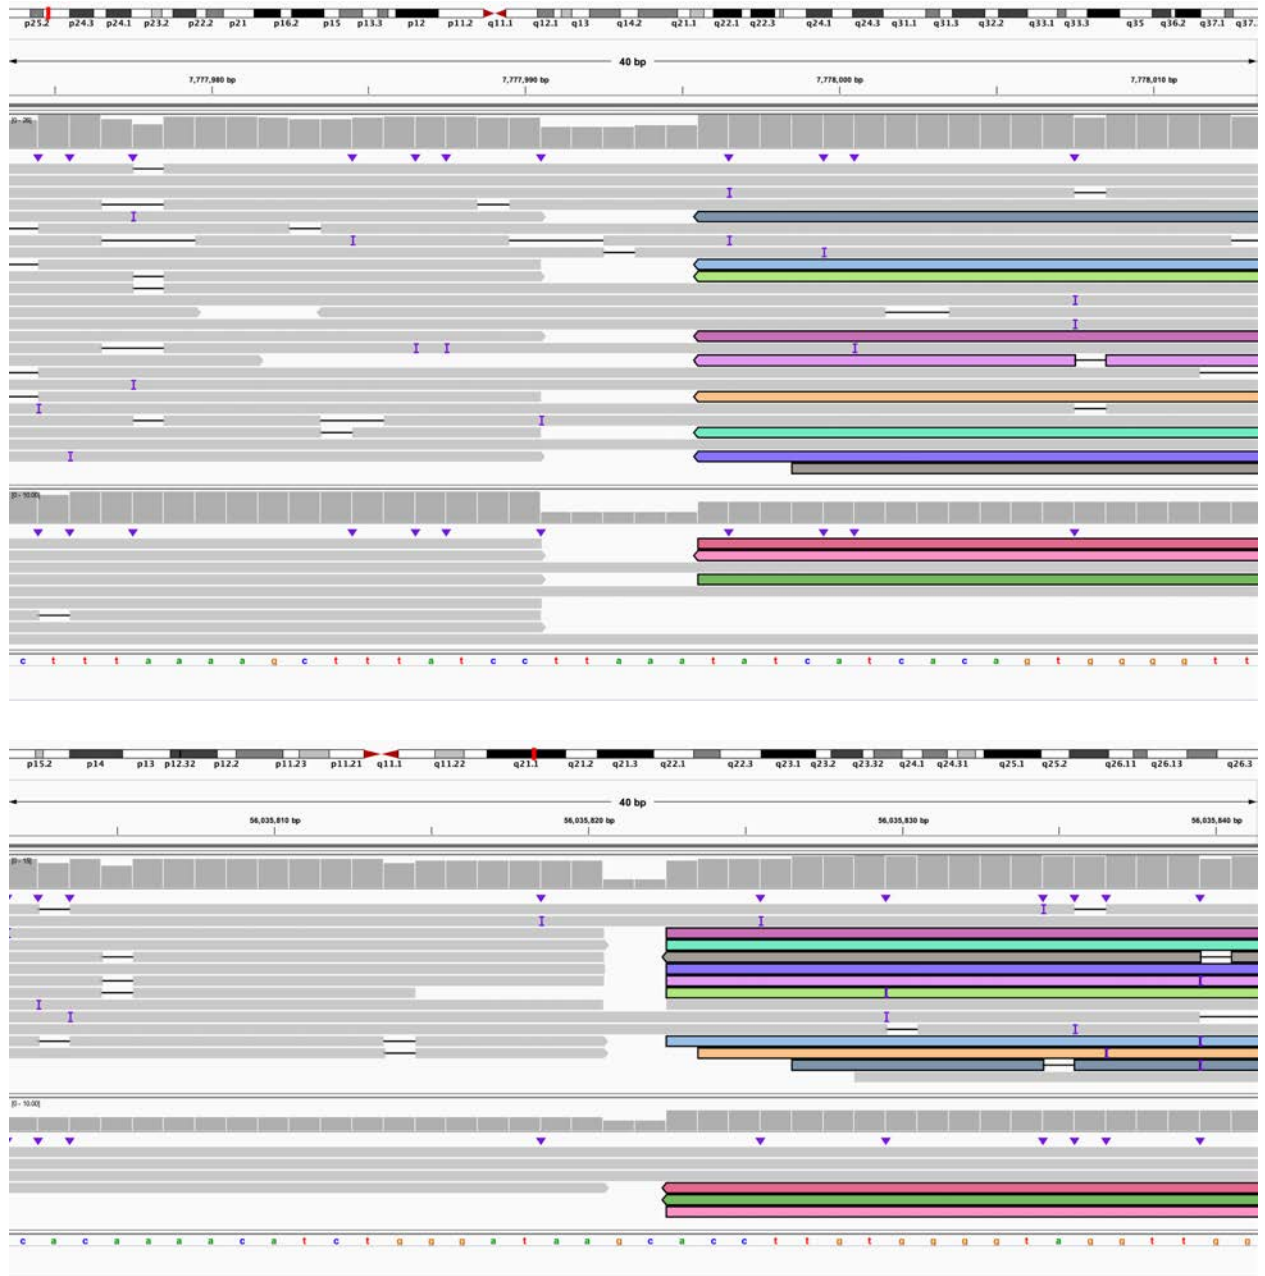

**P.** The 5' end of 2:B (IGV: chr2:7,777,974-7,778,013) is connected to the 5' end of 10:J (IGV: chr10:56,035,802-56,035,841). This is within derivative chromosome 4.

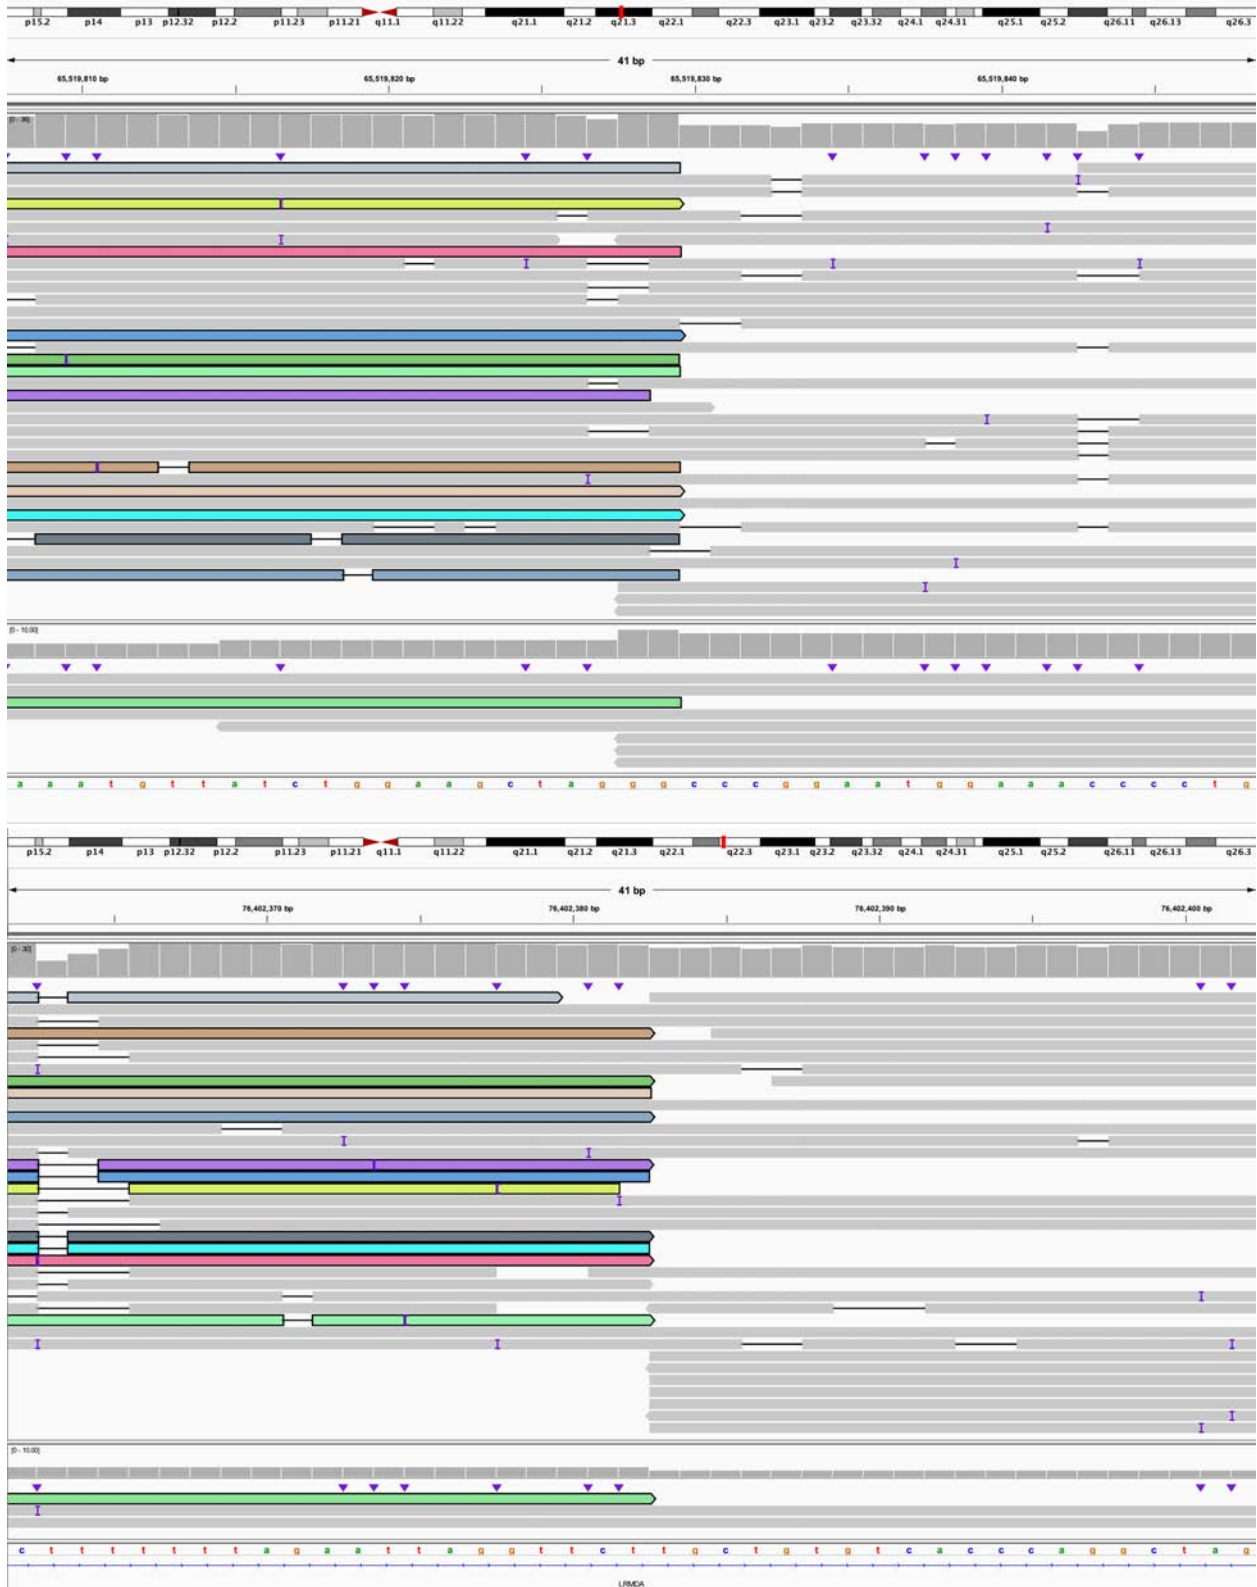

**Q.** The 3' end of 10:J (IGV: chr10:65,519,808-65,519,848) is connected to the 3' end of 10:M and bisects *LRMDA* (IGV: chr10:76,402,362-76,402,402). This is within derivative chromosome 4.

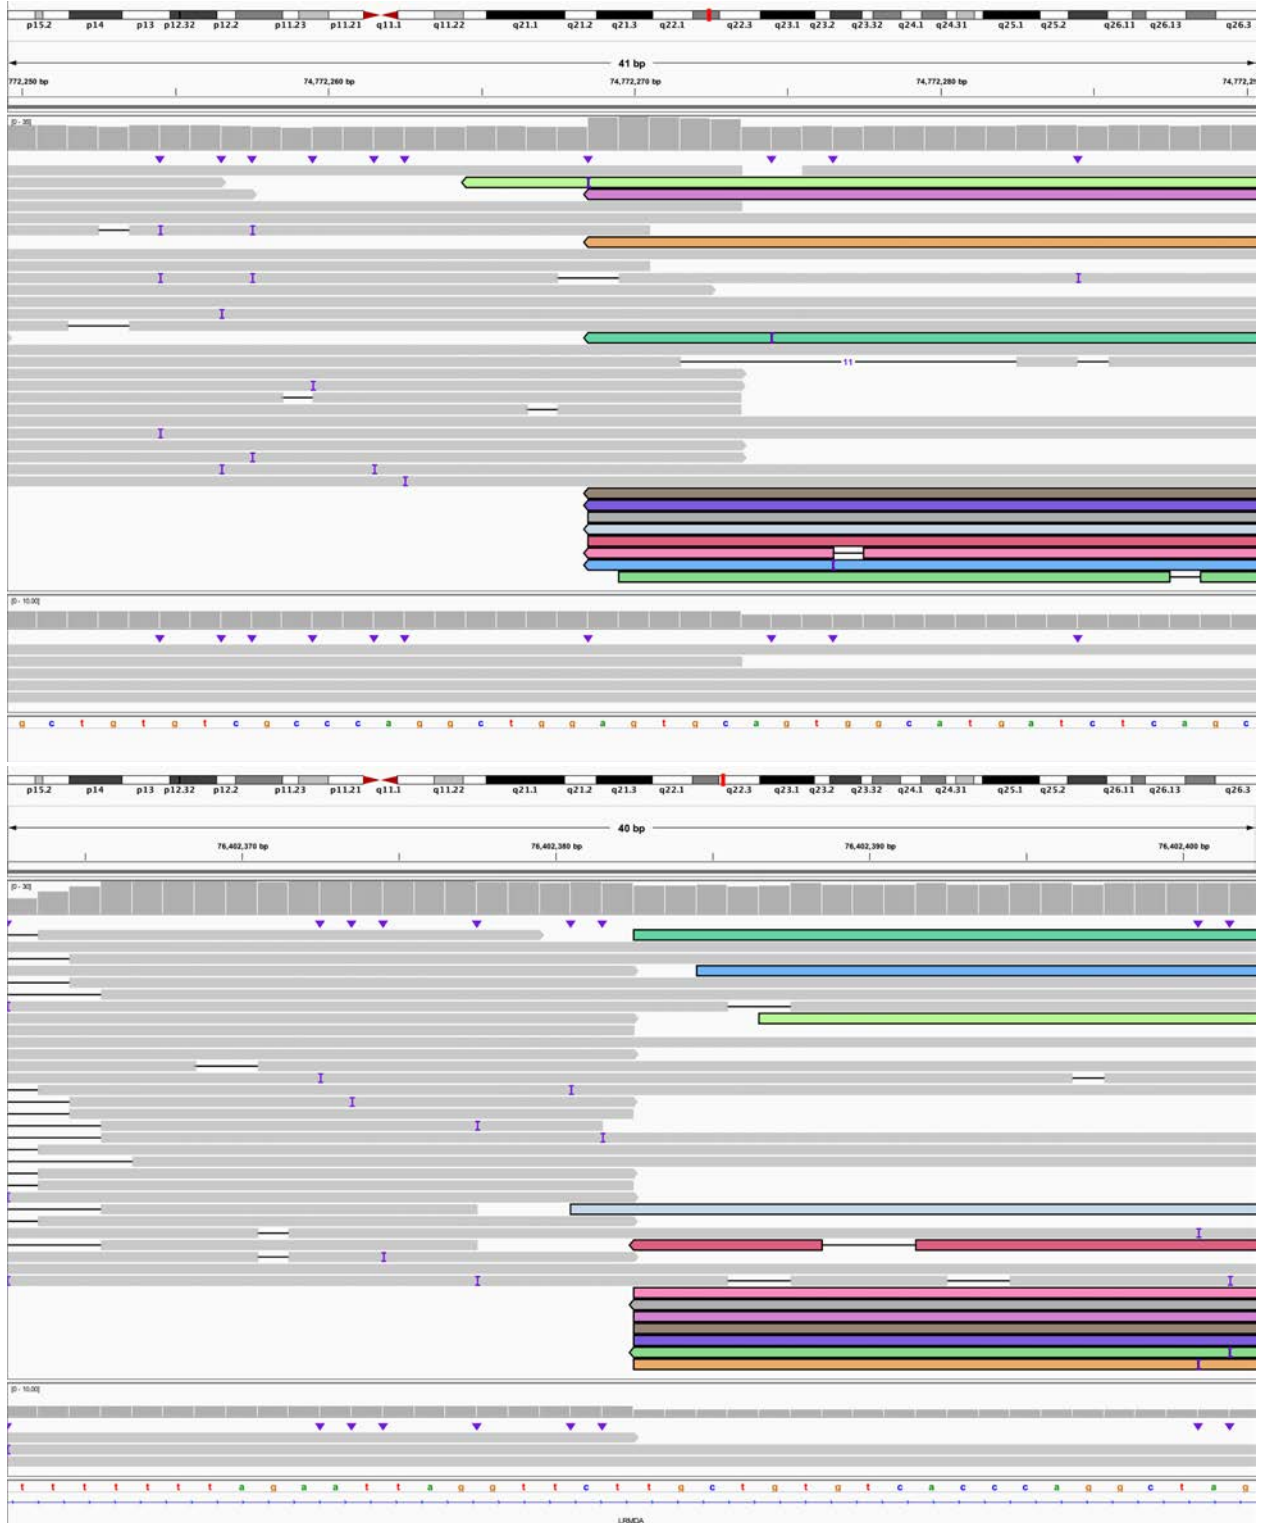

**R.** The 5' end of 10:M (IGV: chr10:74,772,250-74,772,290) is connected to the 5' end of 10:N and bisects *LRMDA* (IGV: chr10:76,402,363-76,402,402). This is the end of derivative chromosome 4.



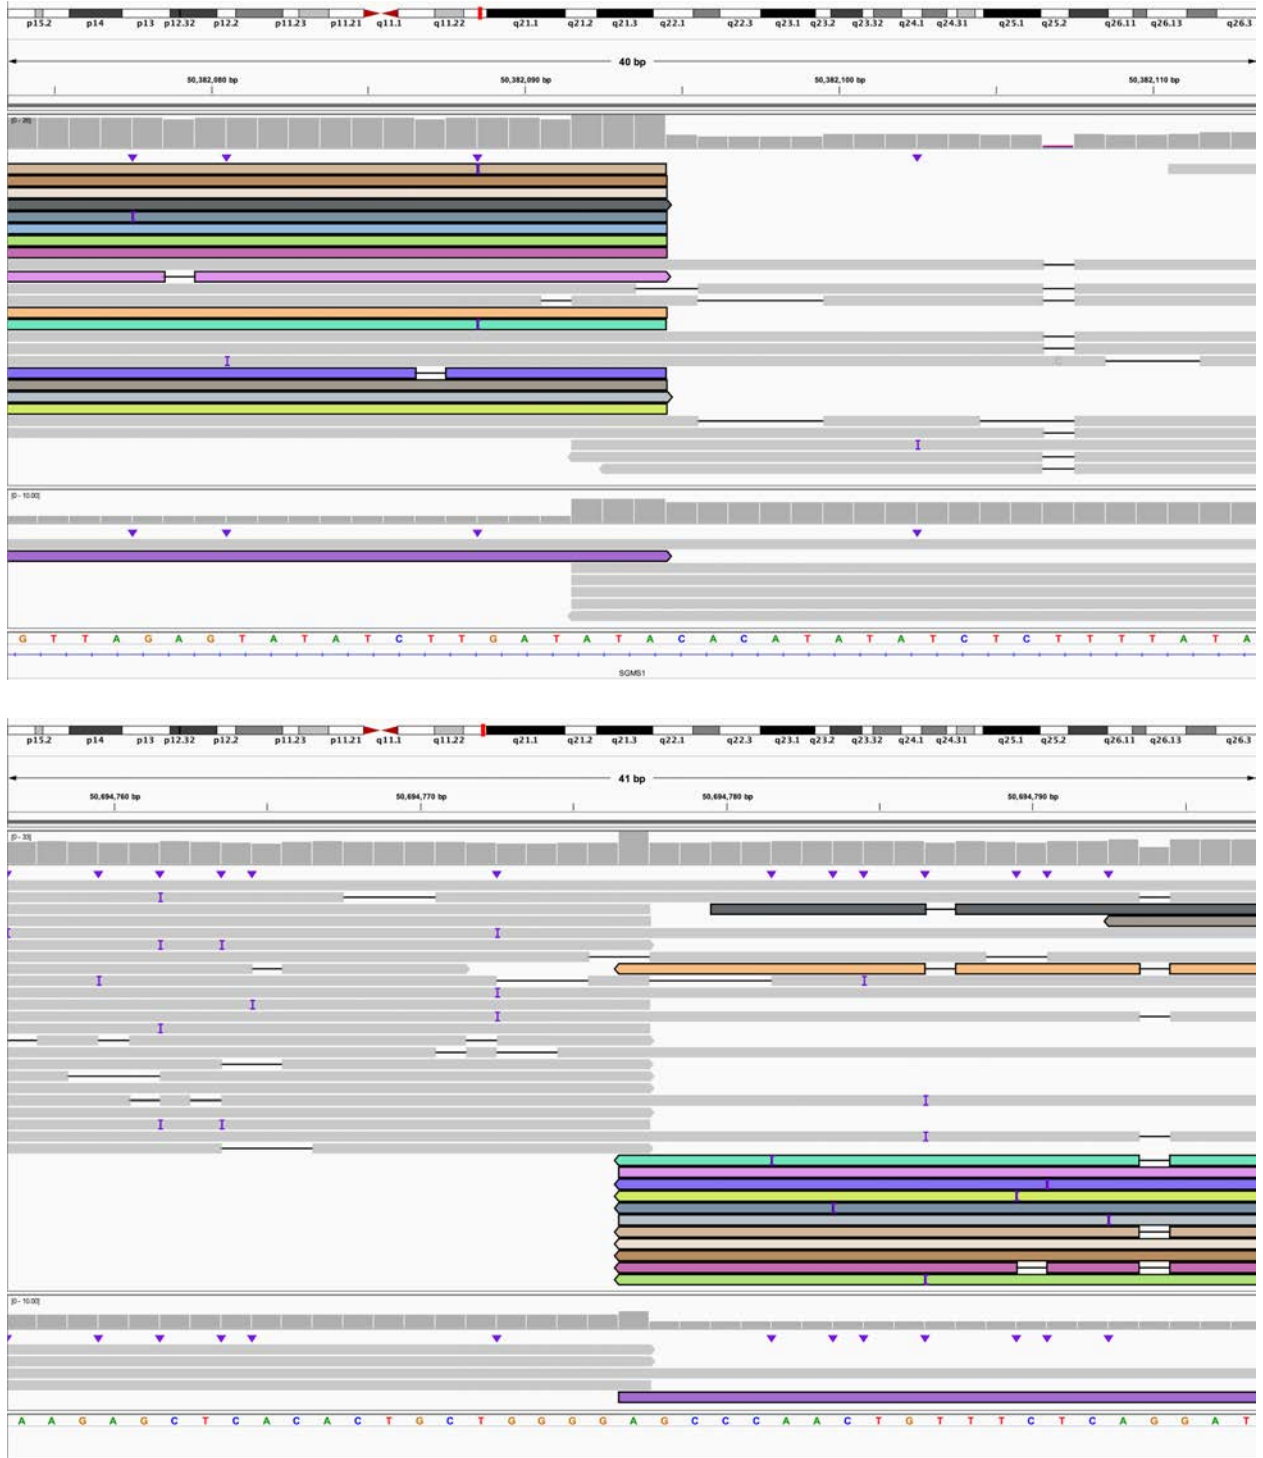

S. The 3' end of 10:A bisects *SGMS1* (IGV: chr10:50,382,074-50,382,113) and is connected to the 5' end of 10:D (IGV: chr10:50,694,757-50,694,797). This is the beginning of derivative chromosome 10.

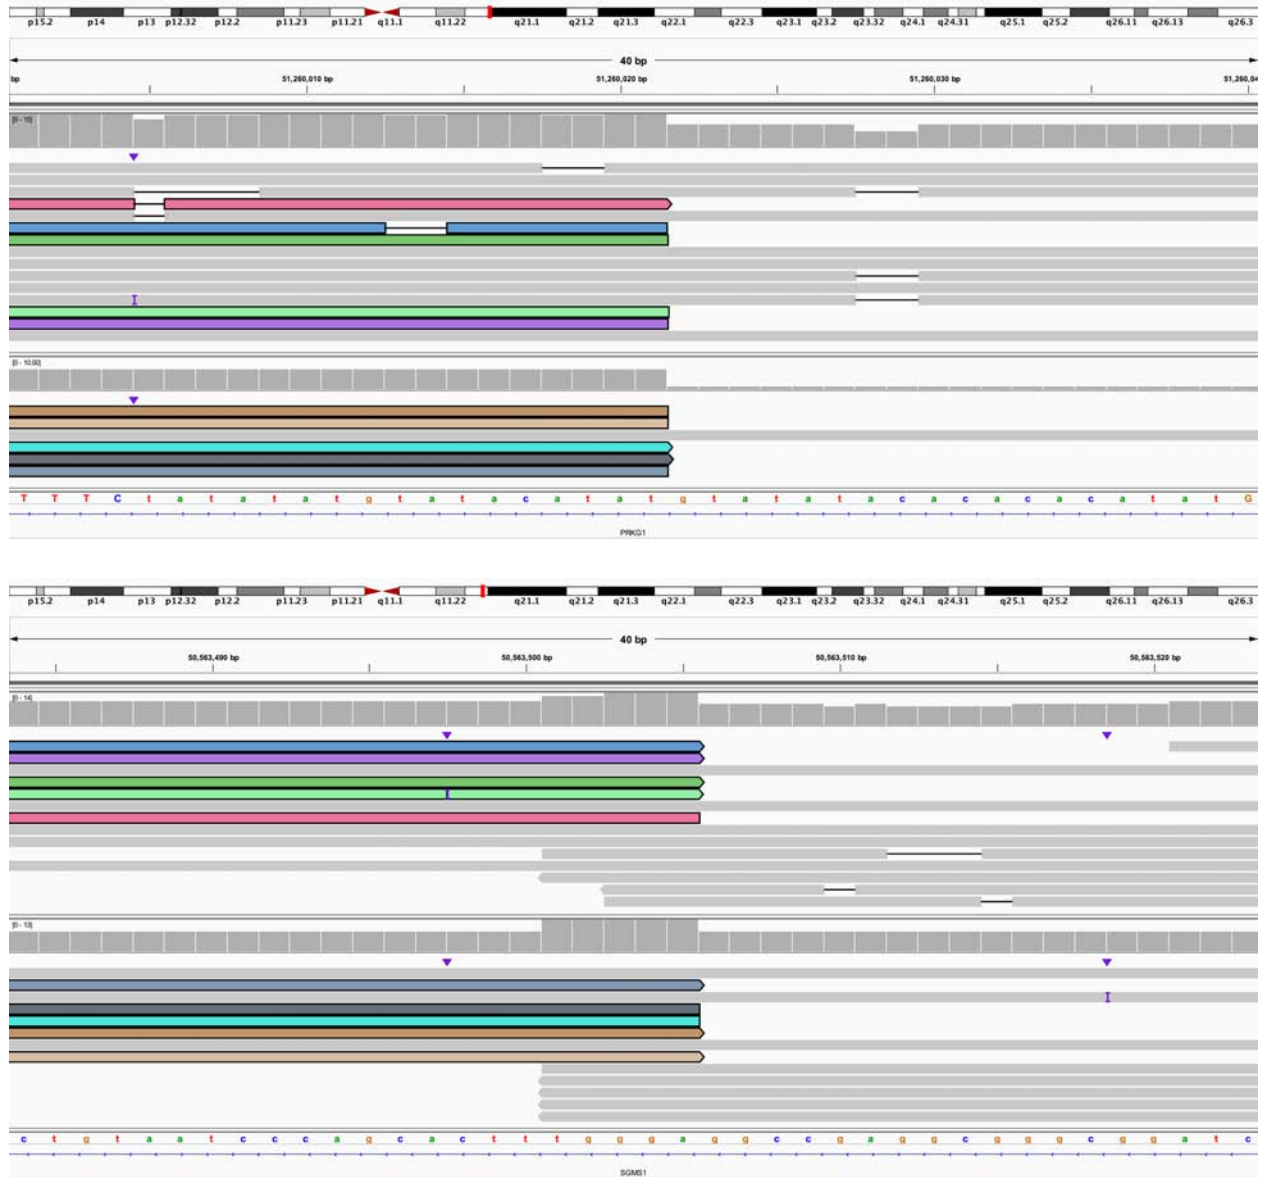

**T.** The 3' end of 10:D bisects *PRKG1* (IGV: chr10:51,260,001-51,260,040) and is connected to the 3' end of 10:B which bisects *SGMS1* (IGV: chr10:50,563,484-50,563,523). This is within derivative chromosome 10.



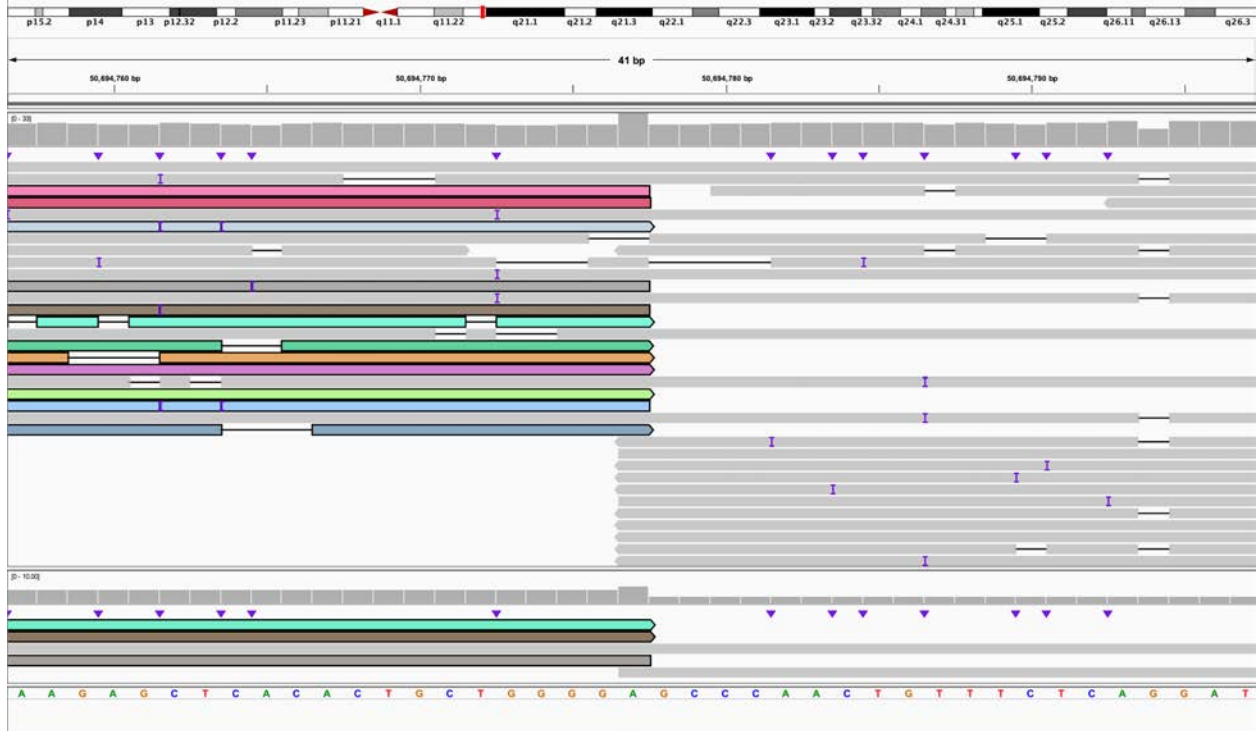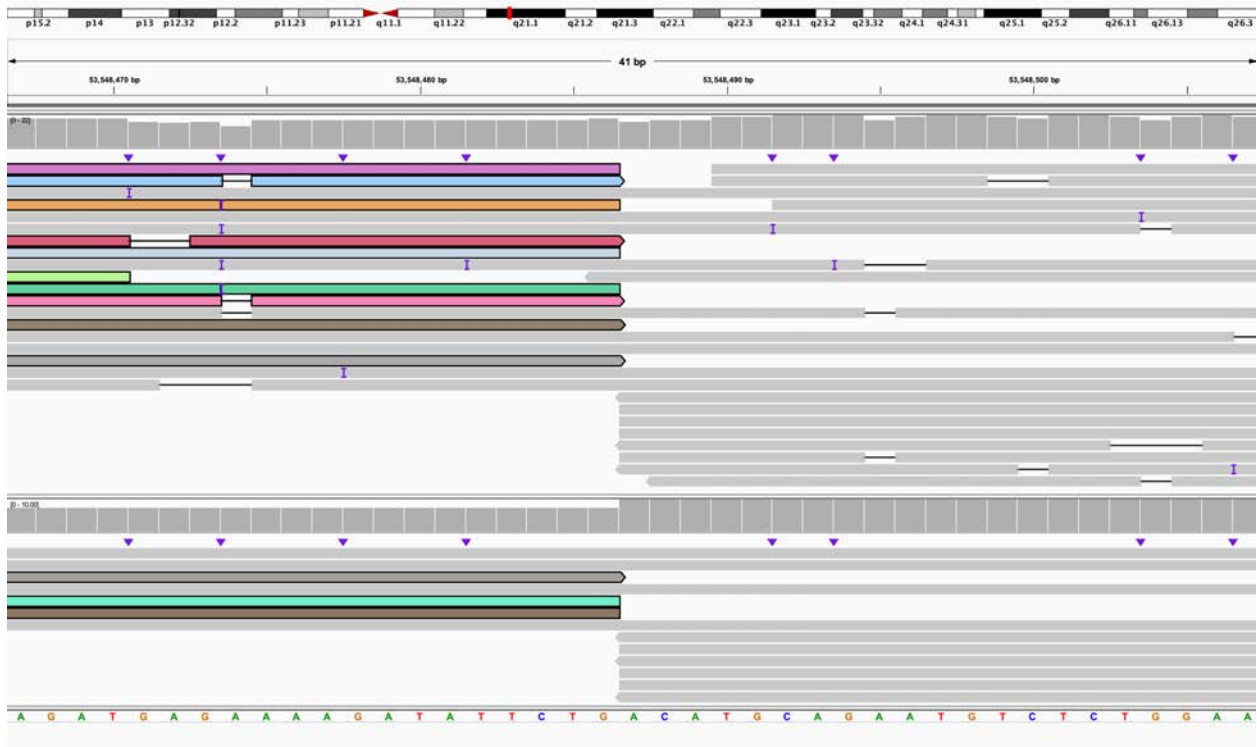

V. The 3' end of 10:C (IGV: chr10:50,694,757-50,694,797) is connected to the 3' end of 10:F (IGV: chr10:53,548,467-53,548,507). This is within derivative chromosome 10.

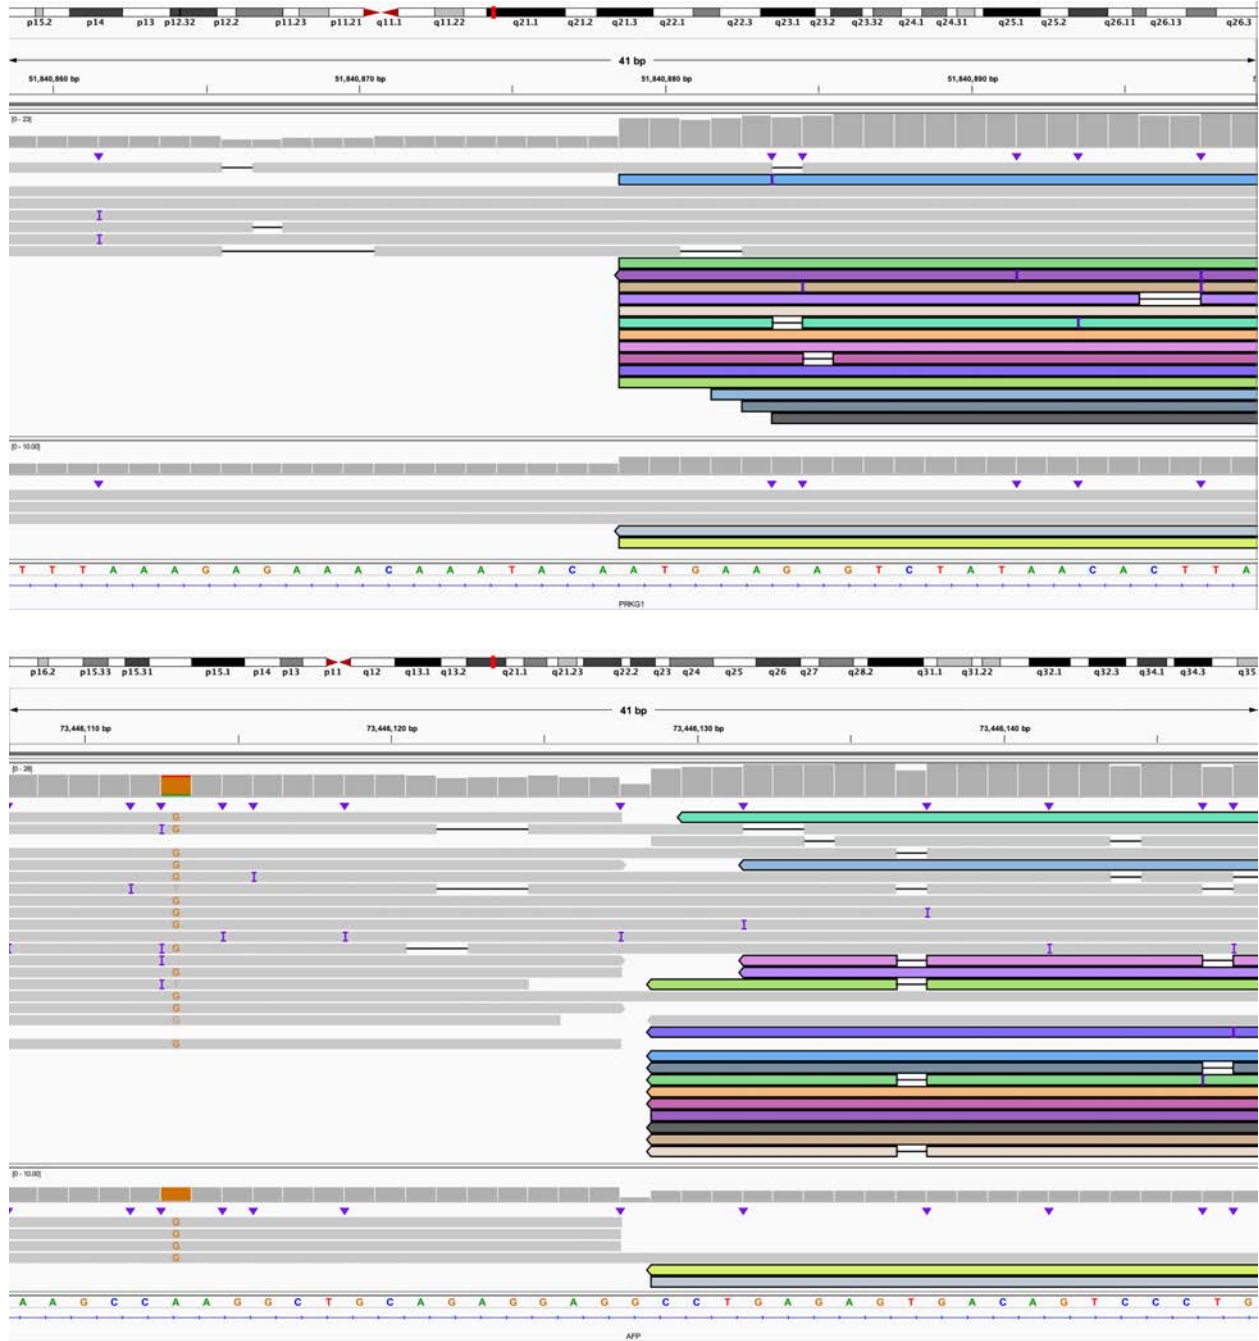

W. The 5' end of 10:F bisects *PRKG1* (IGV: chr10:51,840,859-51,840,899) and is connected to the 5' end of 4:F and bisects *AFP* (IGV: chr4:73,446,108-73,446,148). This is within derivative chromosome 10.

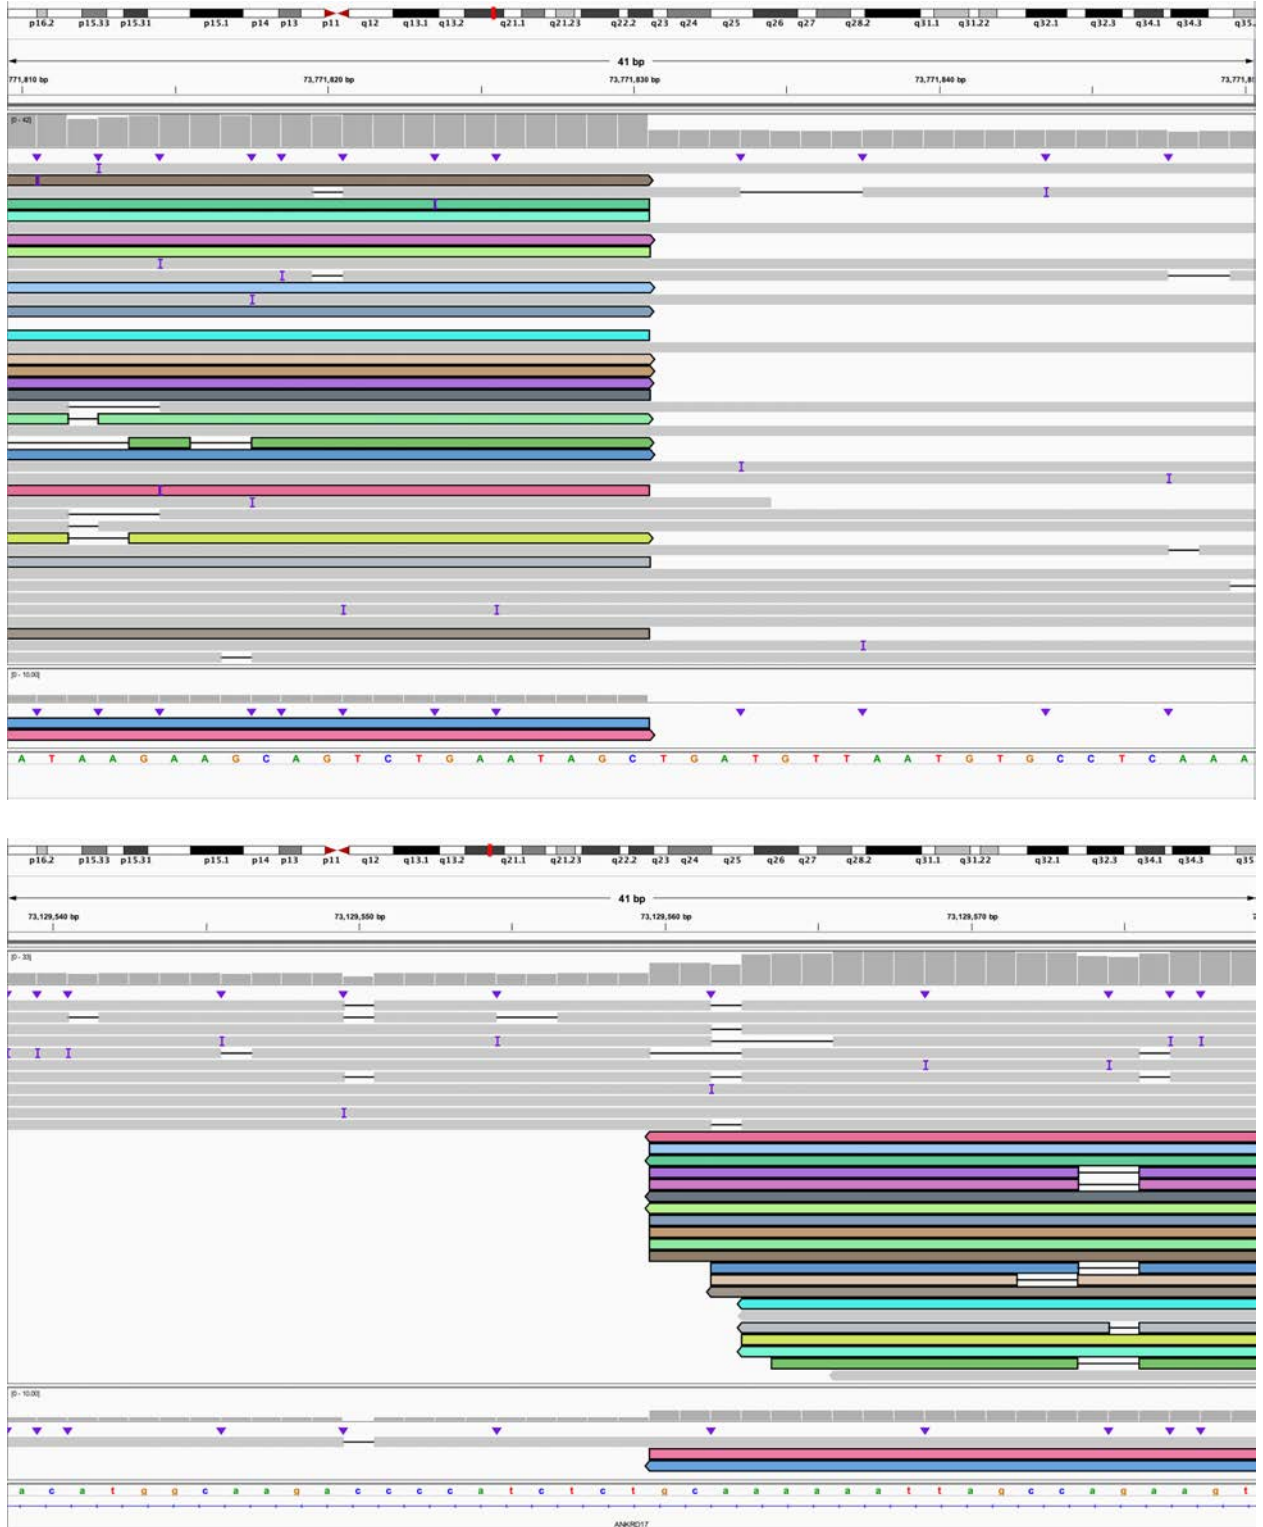

X. The 3' end of 4:F (IGV: chr4:73,771,810-73,771,850) is connected to the 5' end of 4:E which bisects *ANKRD17* (IGV: chr4:73,129,539-73,129,579). This is within derivative chromosome 10.

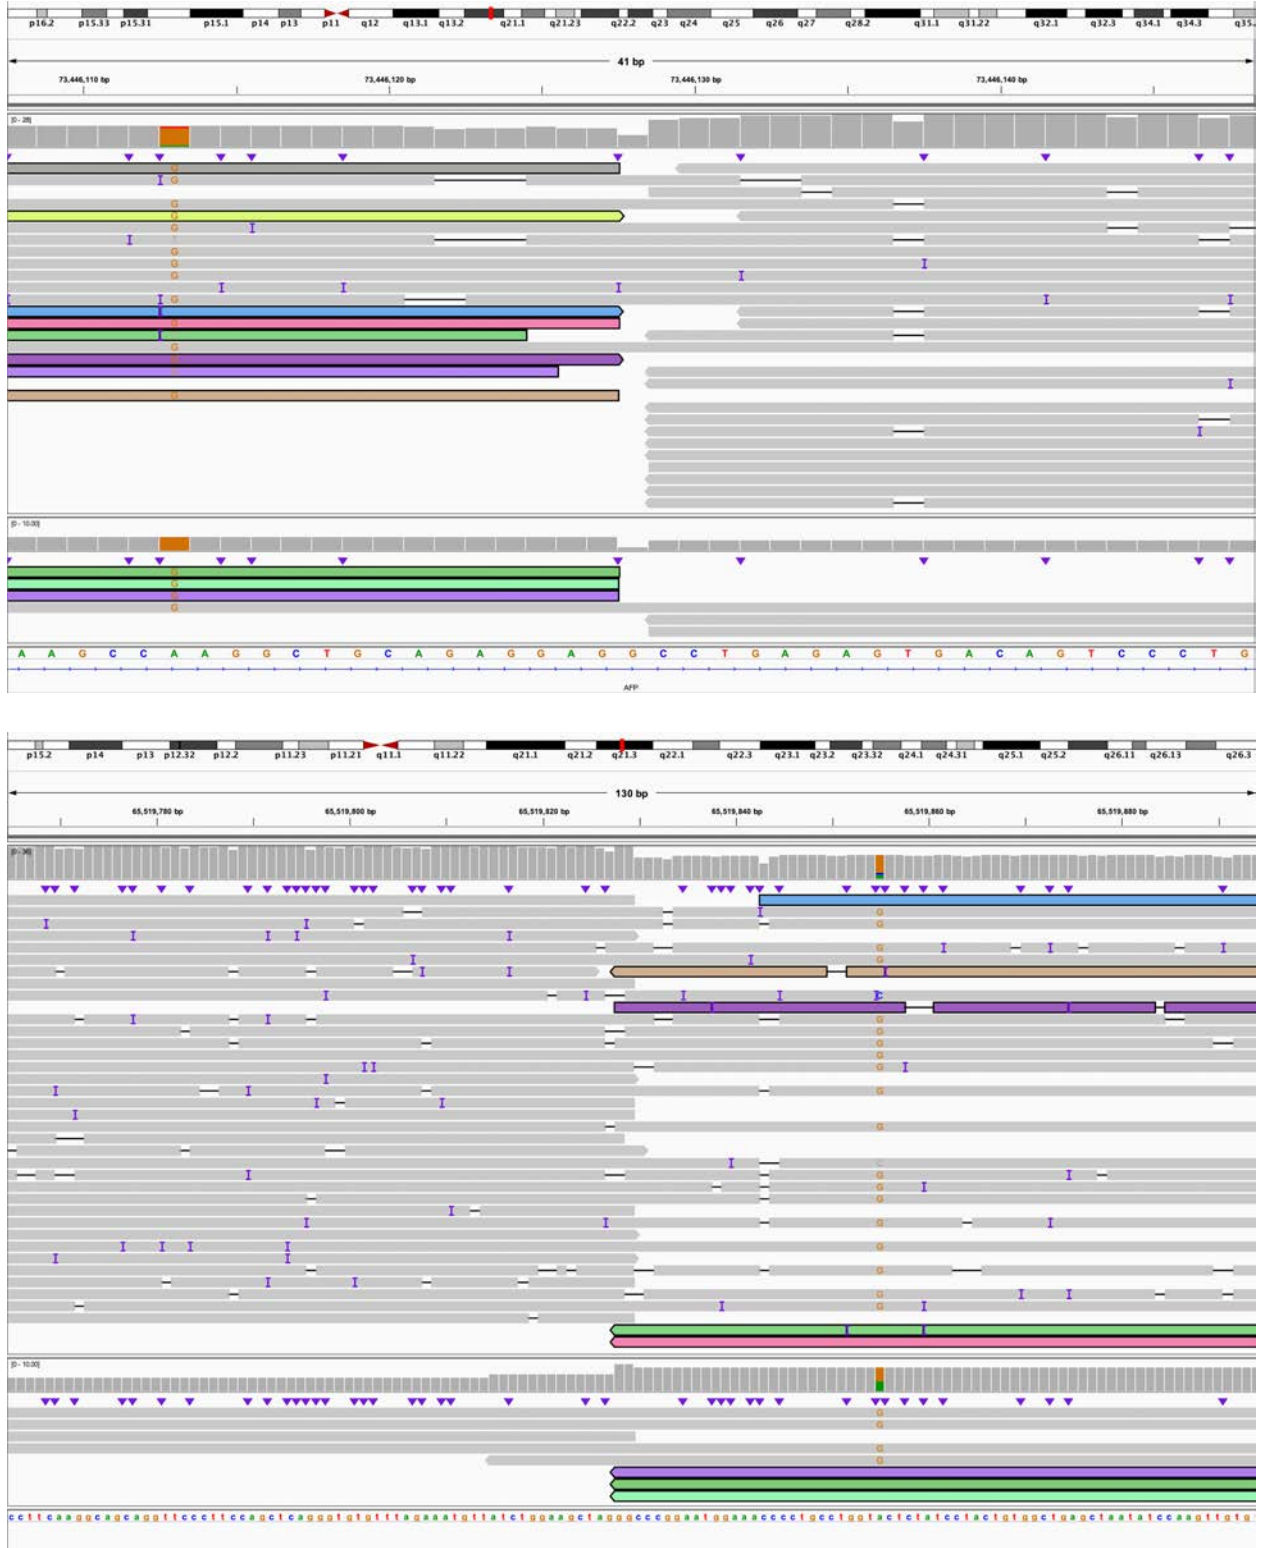

**Y.** The 3' end of 4:E bisects *AFP* (IGV: chr4:73,446,108-73,446,148) and is connected to the 5' end of 10:K (IGV: chr10:65,519,765-65,519,894). This is within derivative chromosome 10.

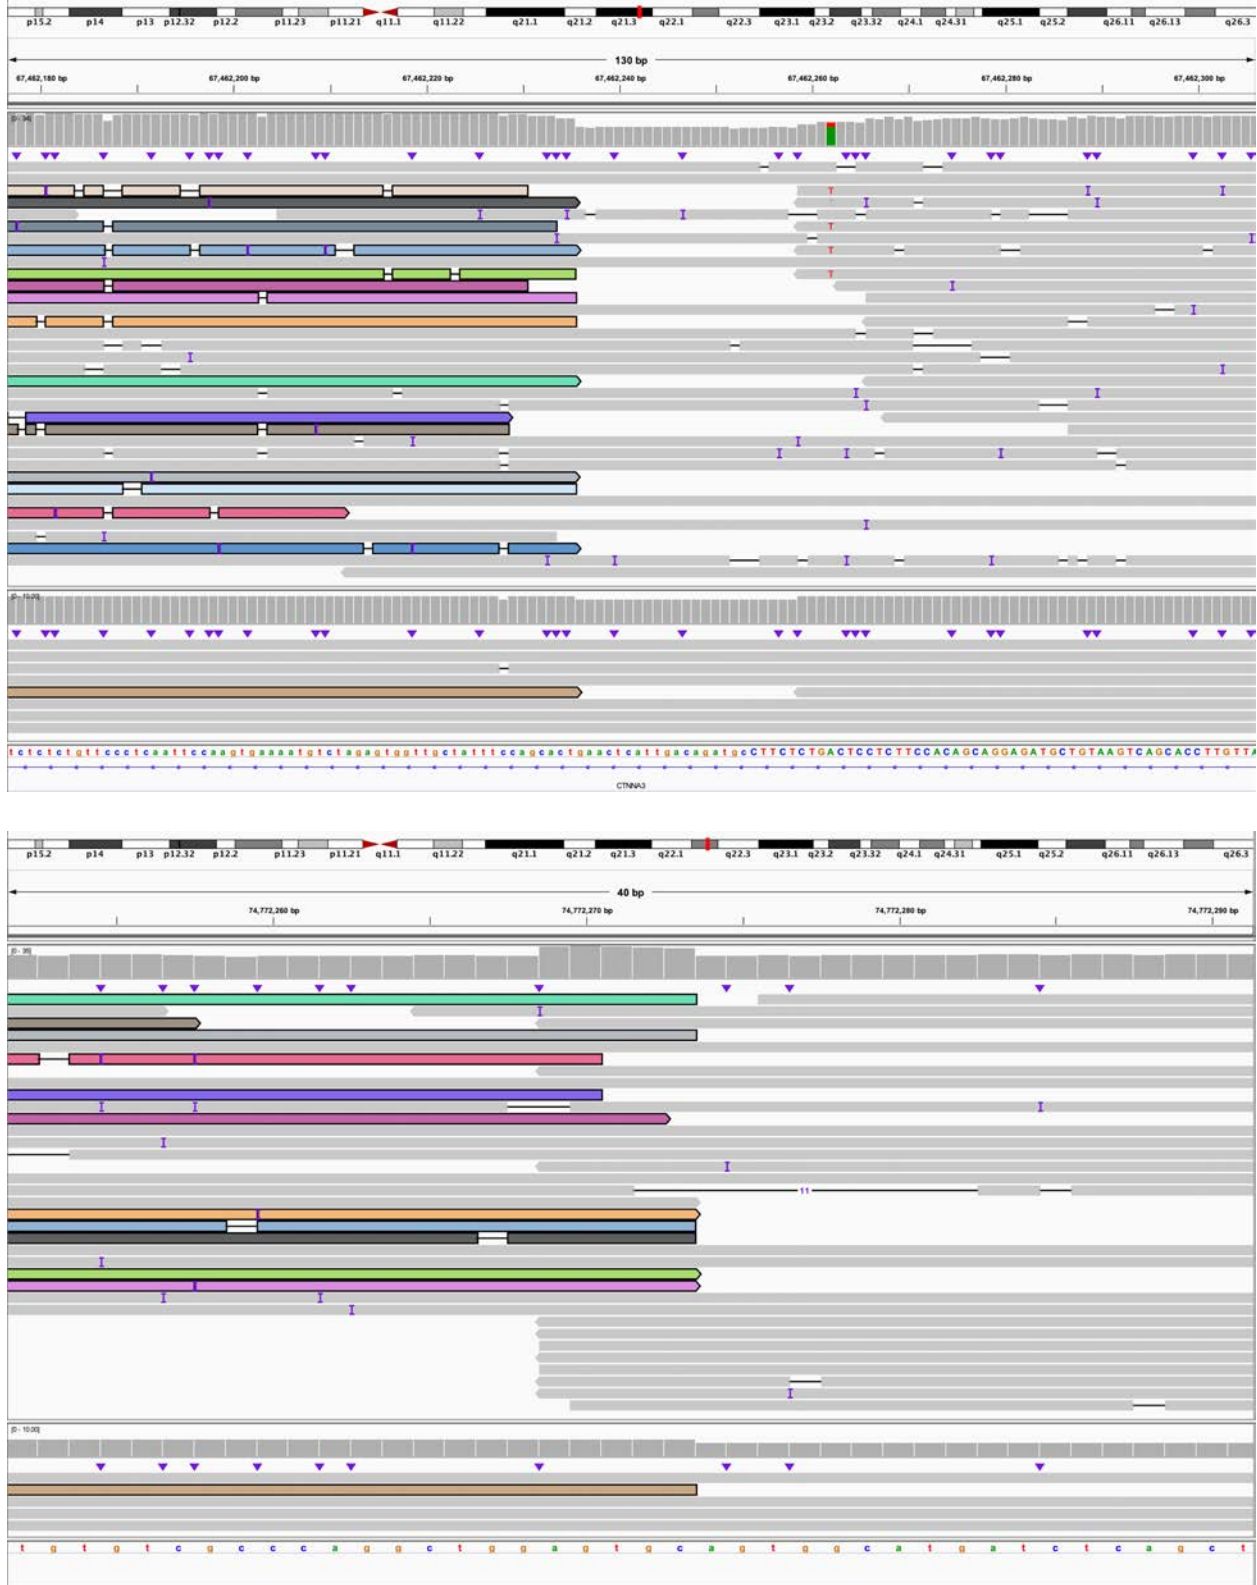

**Z.** The 3' end of 10:K bisects *CTNNA3* (IGV: chr10:67,462,177-67,462,306) and is connected to the 3' end of 10:L (IGV: chr10:74,772,252-74,772,291). This is within derivative chromosome 10.



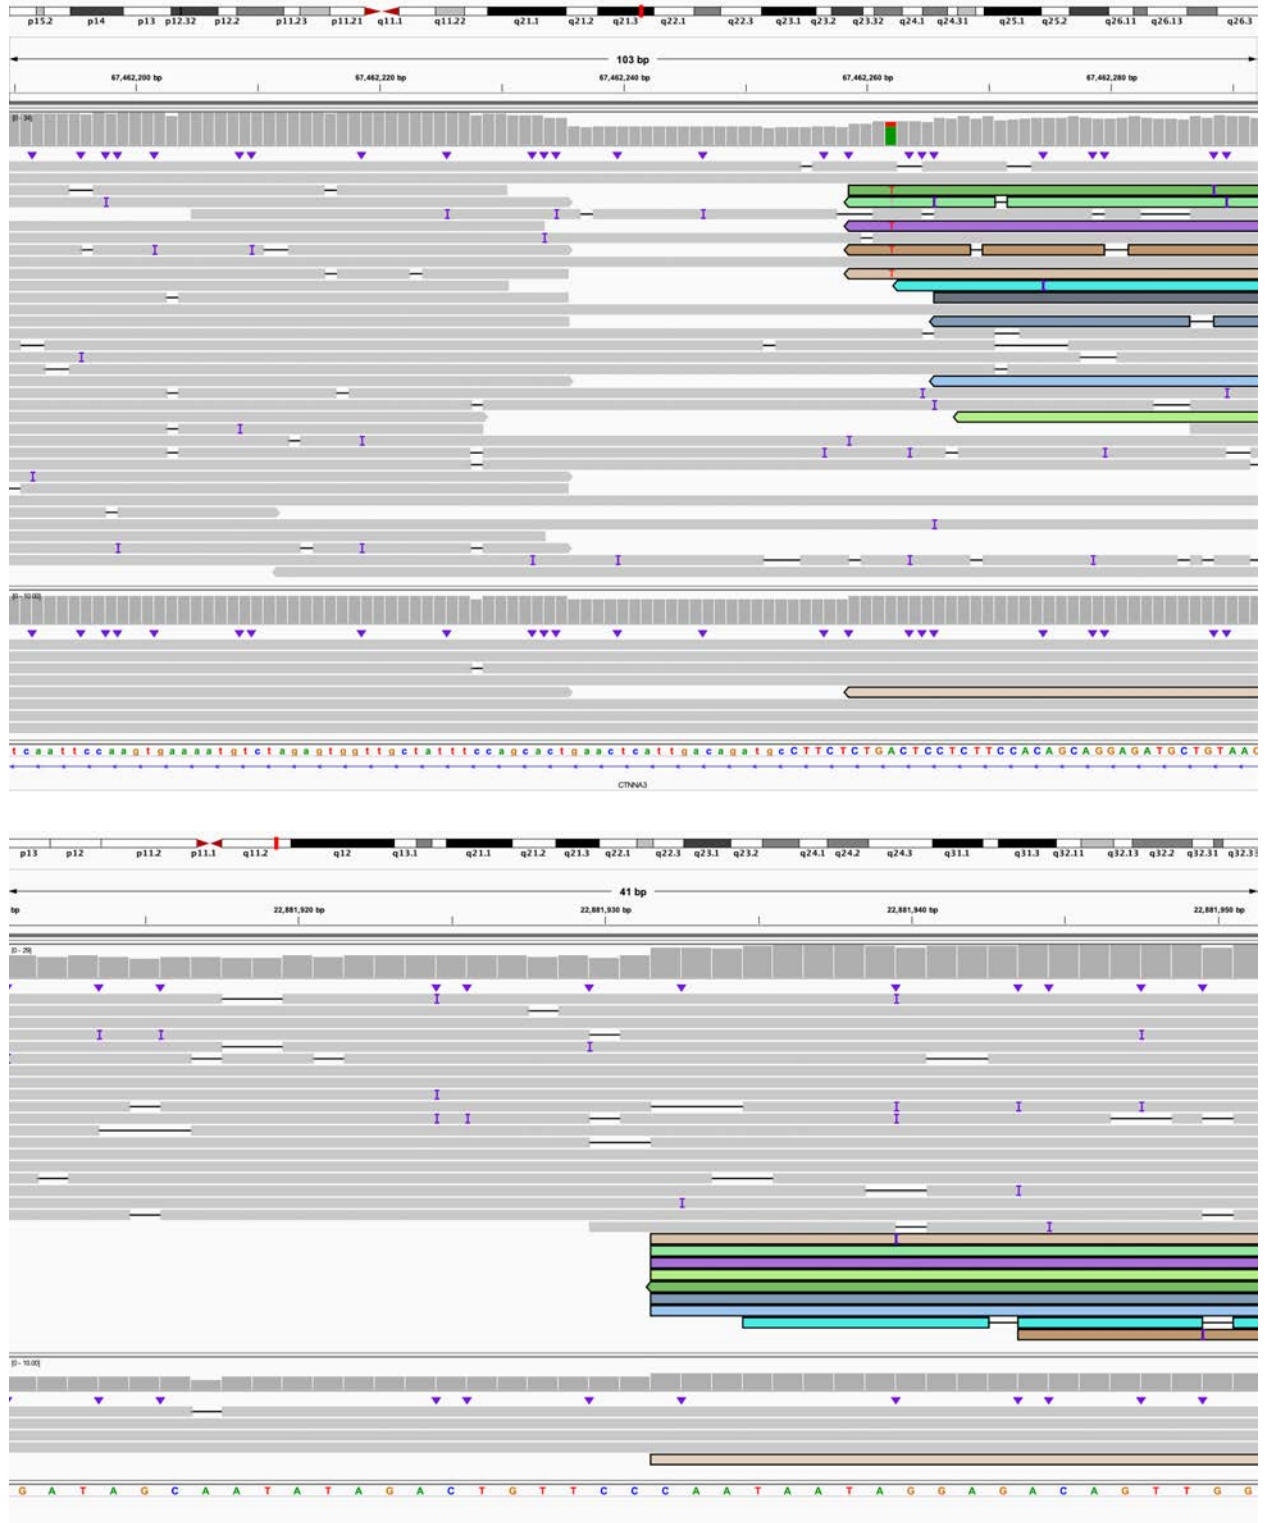

AA. The 5' end of 10:L bisects *CTNNA3* (IGV: chr10:67,462,190-67,462,292) and is connected to the 5' end of 14:C (IGV: chr14:22,881,911-22,881,951). This is the end of derivative chromosome 10.

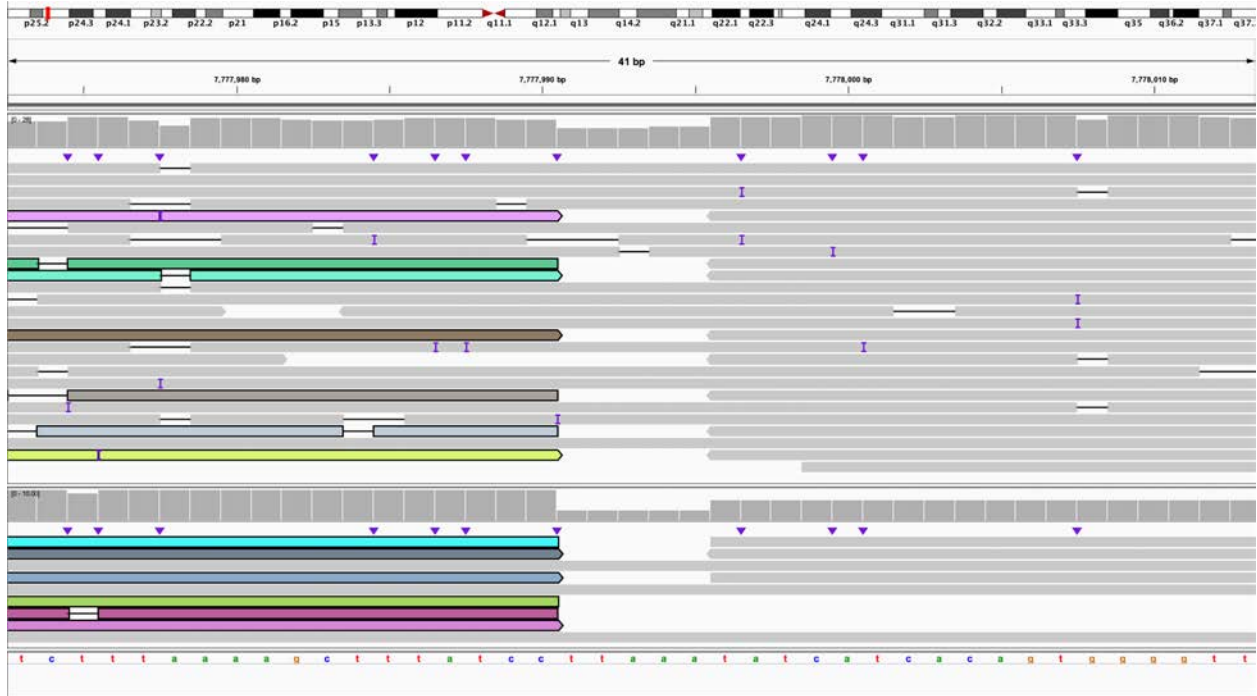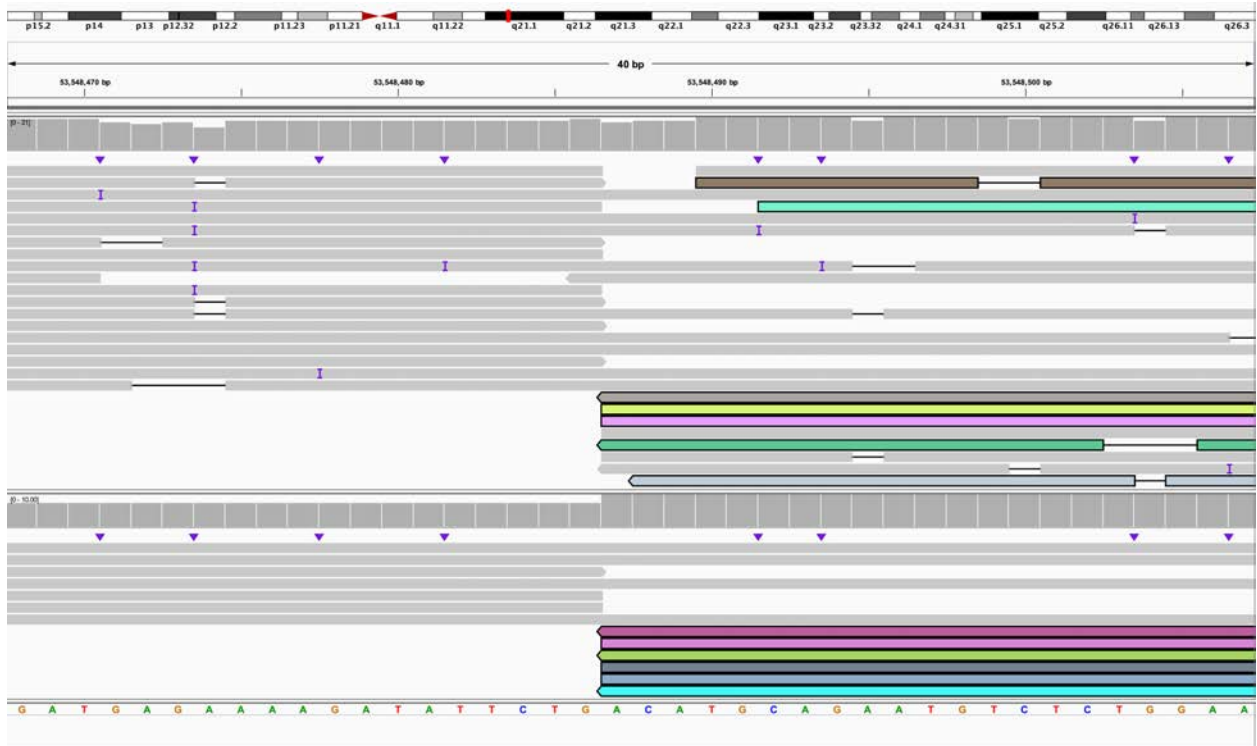

**AB.** The 3' end of 2:A (IGV chr2:7,777,973-7,778,013) is connected to the 5' end of 10:G (IGV chr10:53,548,468-53,548,507). This is the beginning of derivative chromosome 14.

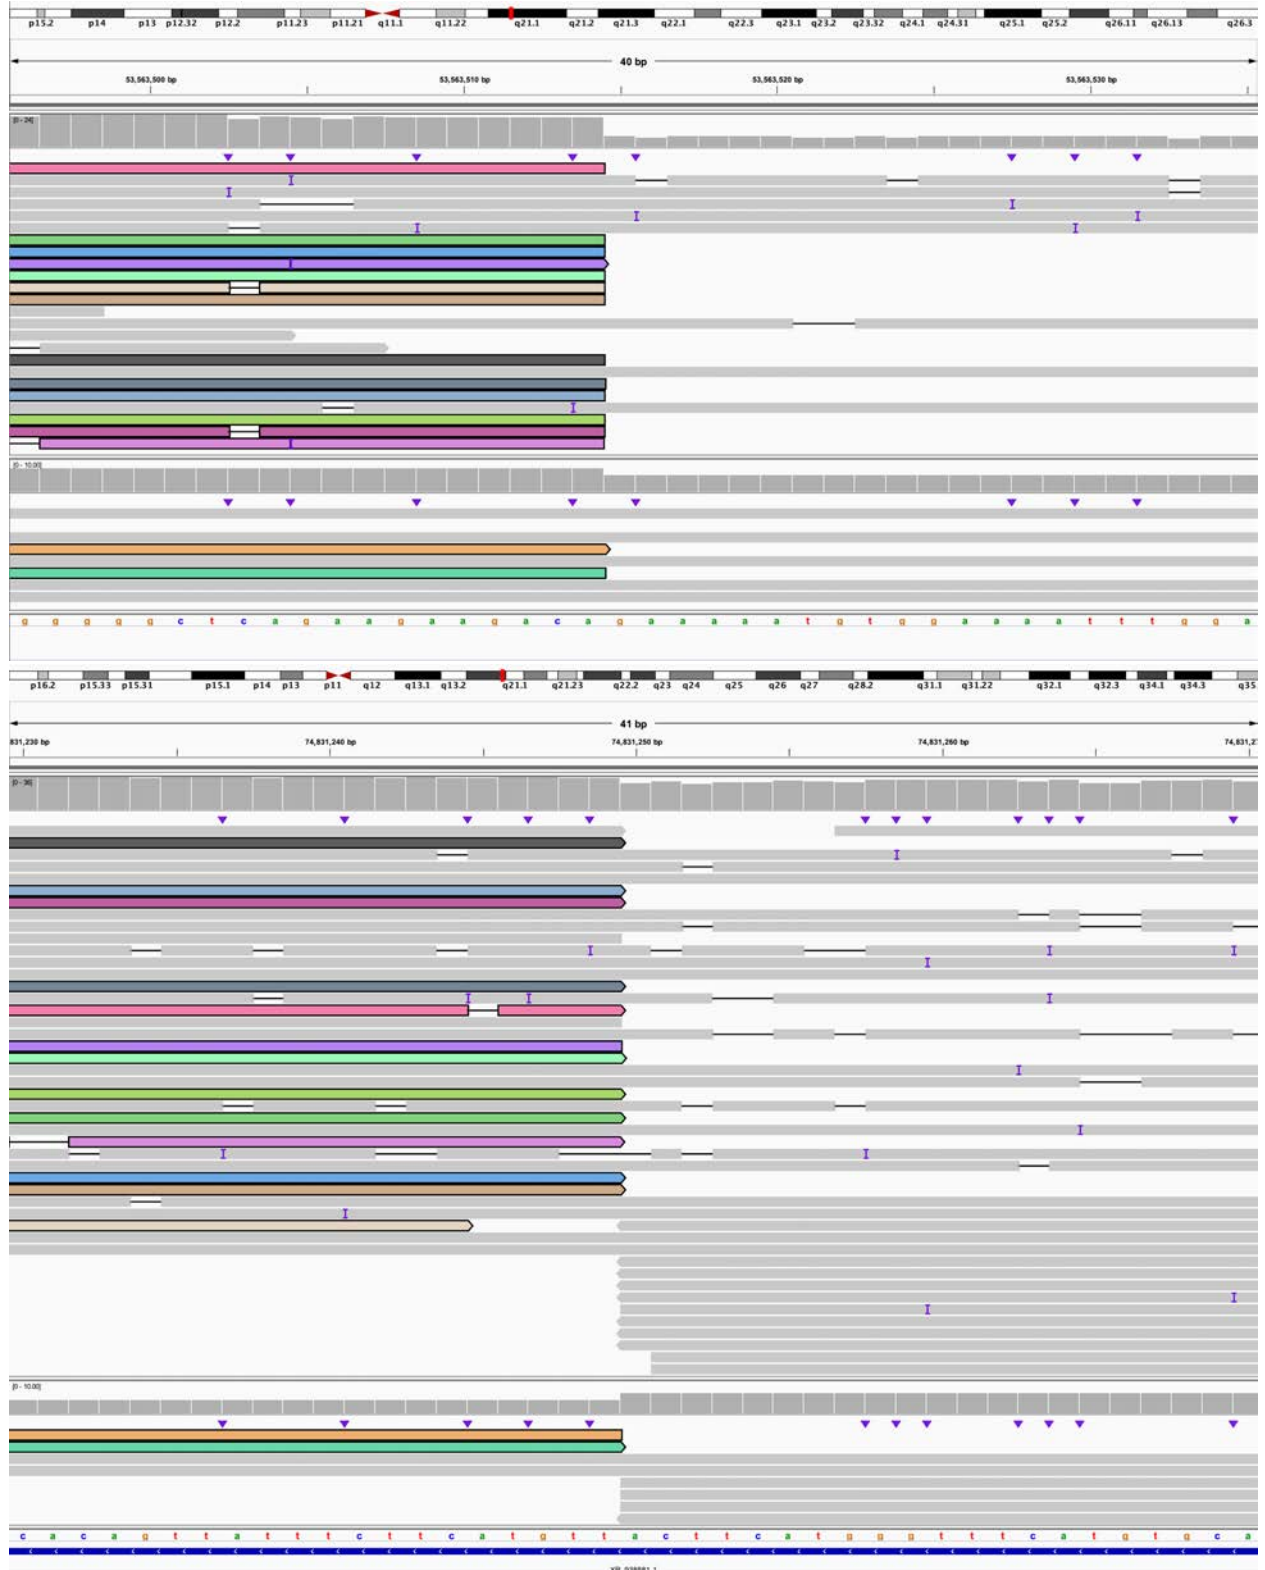

AC. The 3' end of 10:G (IGV: chr10:53,563,496-53,563,535) is connected to the 3' end of 4:I and bisects *XR\_938881.1* (IGV: chr4:74,831,230-74,831,270). This is within derivative chromosome 14.

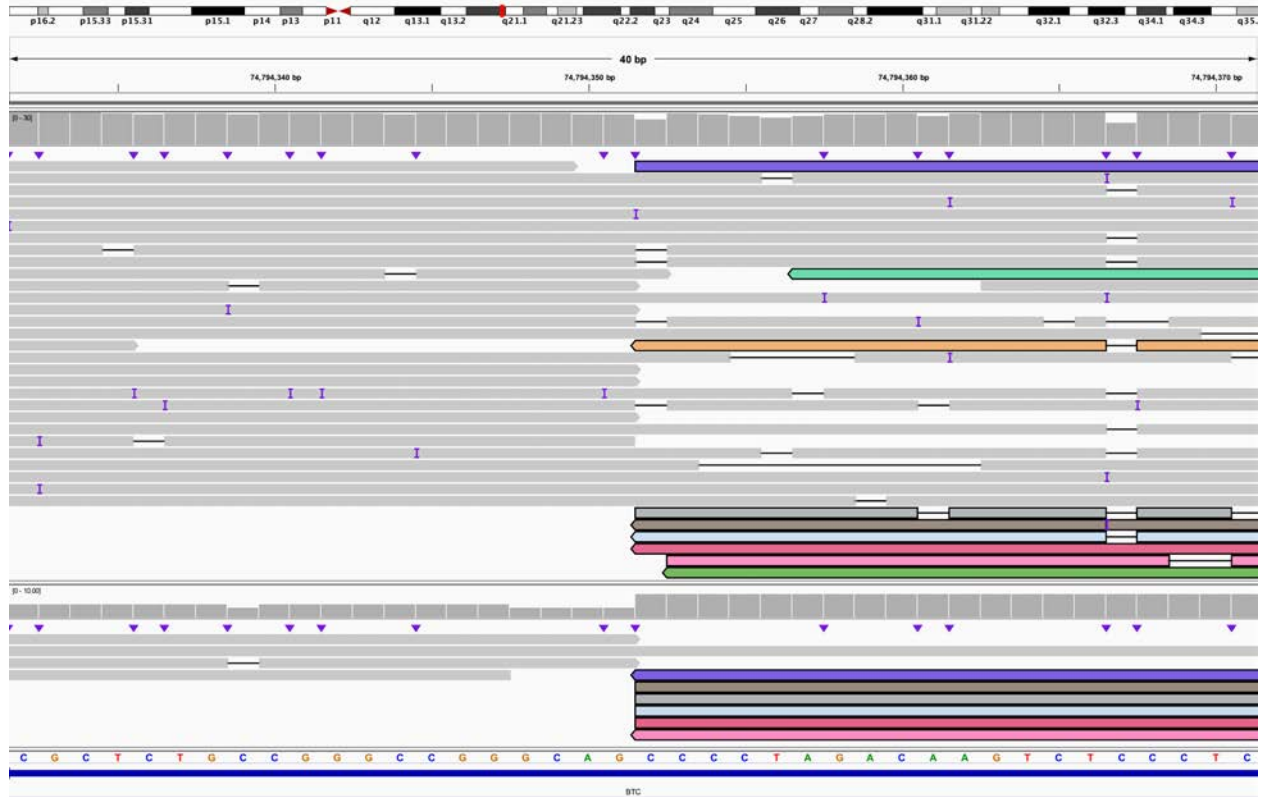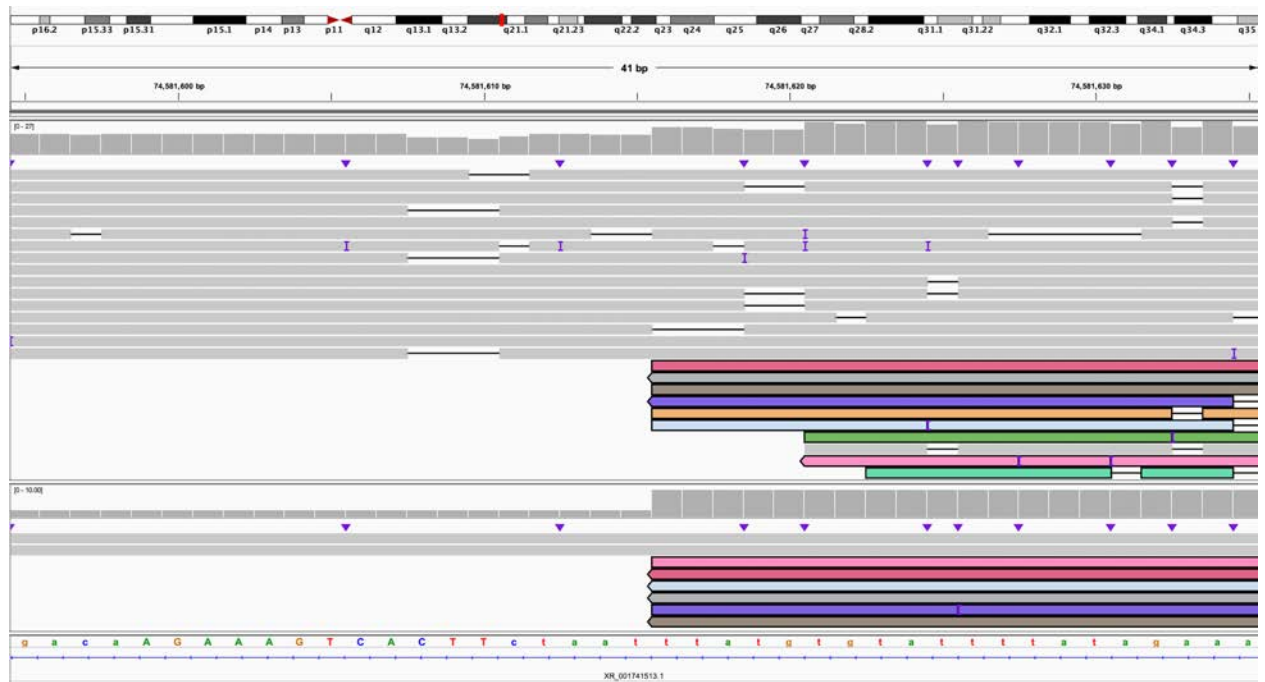

**AD.** The 5' end of 4:I bisects *BTC* (IGV: chr4:74,794,332-74,794,371) and is connected to the 5' end of 4:H and bisects *XR\_001741513.1* (IGV: chr4:74,581,595-74,581,635). This is within derivative chromosome 14.

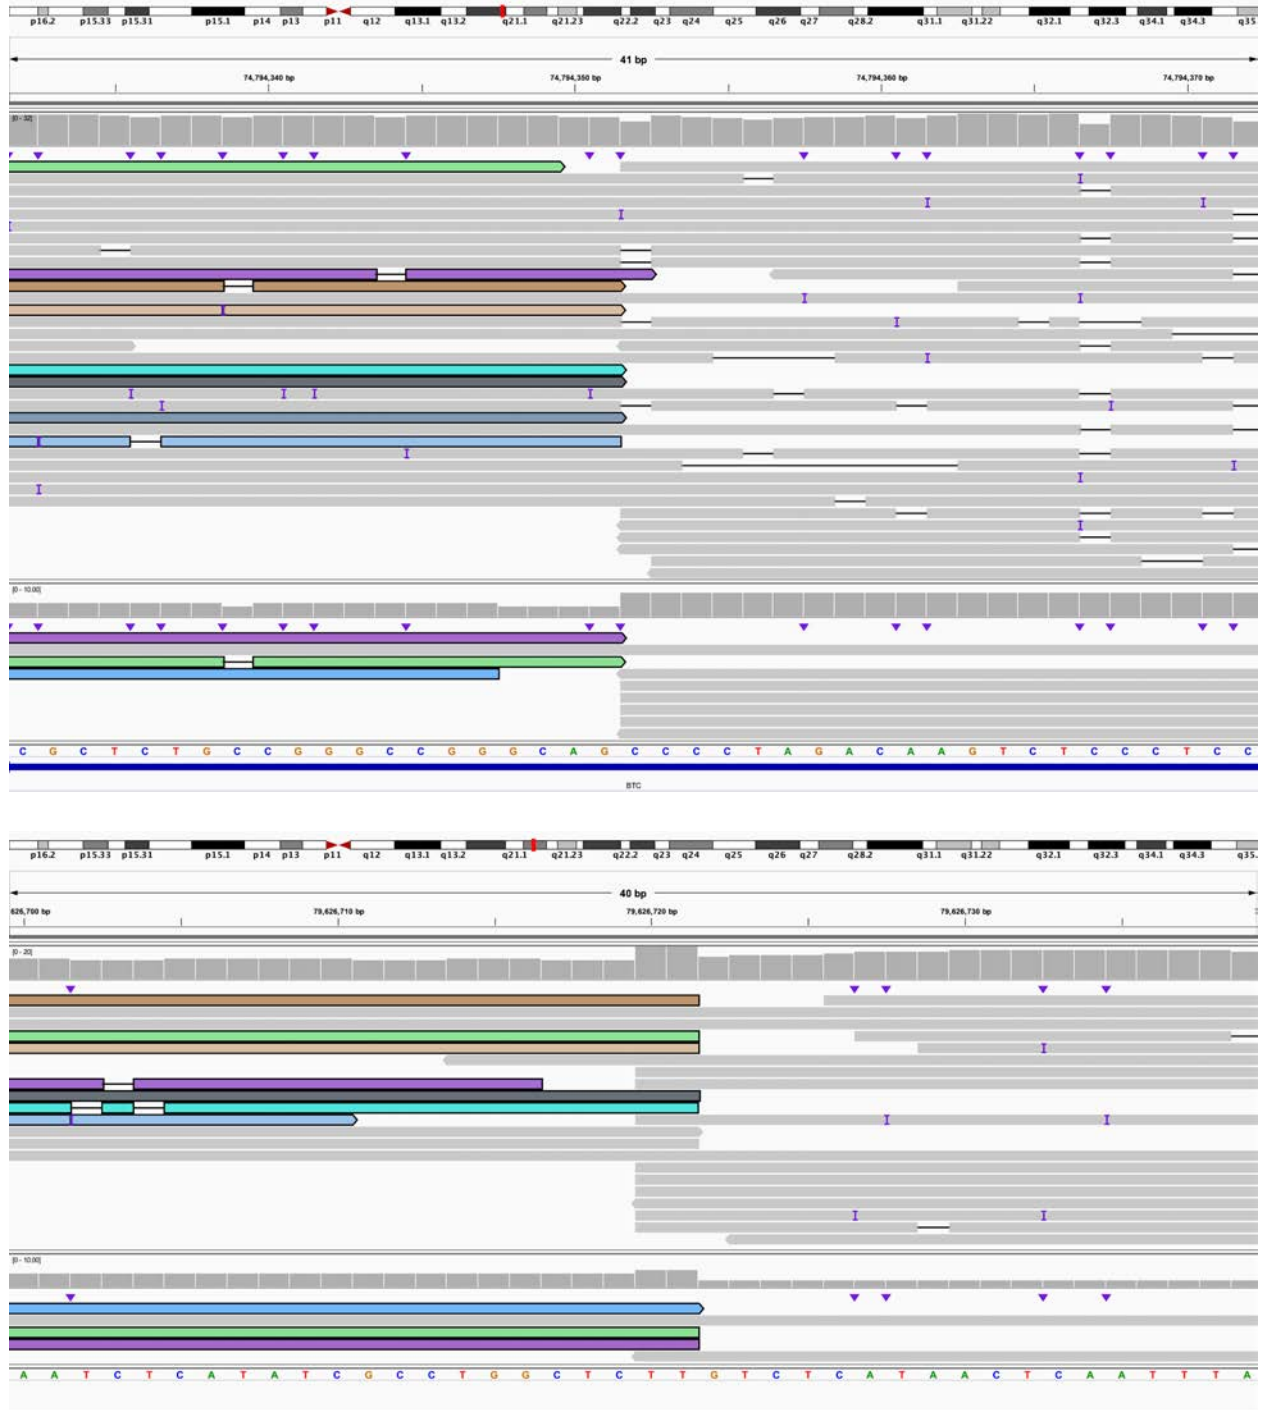

**AE.** The 3' end of 4:H bisects *BTC* (IGV: chr4:74,794,332-74,794,372) and is connected to the 3' end of 4:L (IGV: chr4:79,626,700-79,626,739). This is within derivative chromosome 14.

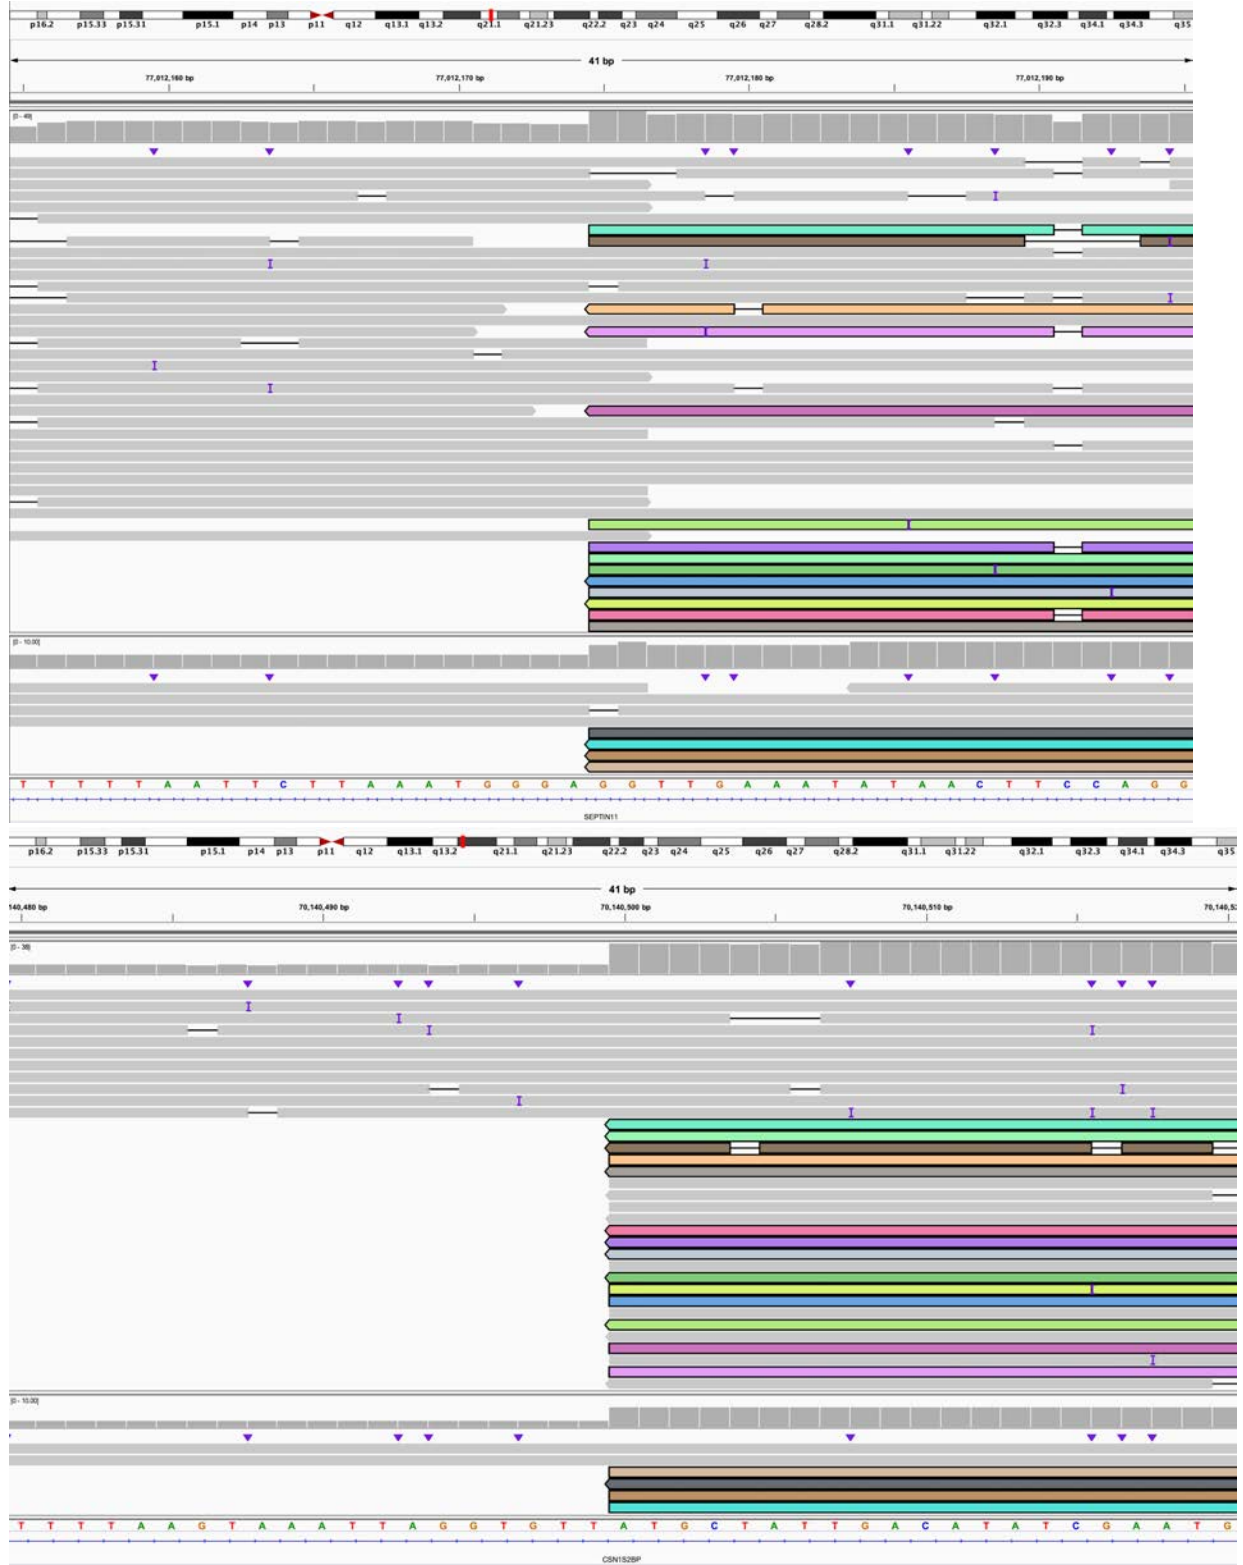

**AF.** The 5' end of 4:L bisects *SEPTIN1* (IGV: chr4:77,012,155-77,012,195) and connects to the 5' end of 4:C and bisects *CSNIS2BP* (IGV: chr4:70,140,480-70,140,520). This is within derivative chromosome 14.



Figure S26. S021, mosaic loss of 8p and mosaic gain of 8q.

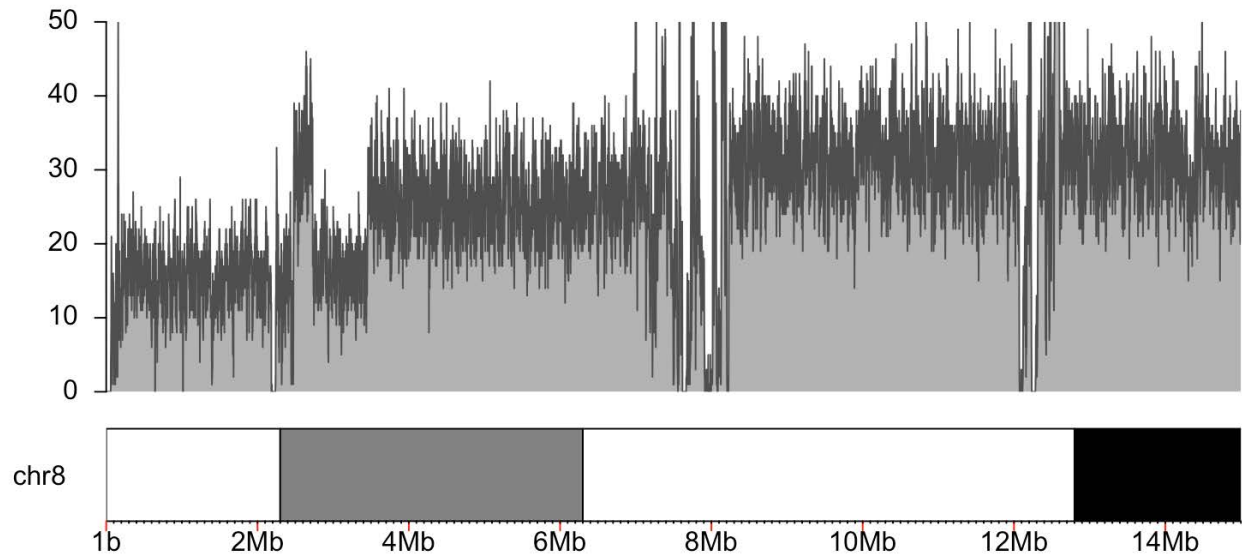

A. Coverage of chr8:1-15,000,000. This demonstrates the presence of a deletion of one chromosome from the telomere to 3,458,035. Also apparent is the mosaic region between 3,469,752 and 7,186,524, then the normal copy state after the defensin locus. The duplication around 2 Mb is frequently observed in SNP array studies and is often not reported on the array as it is considered benign (see panels B–D for details).



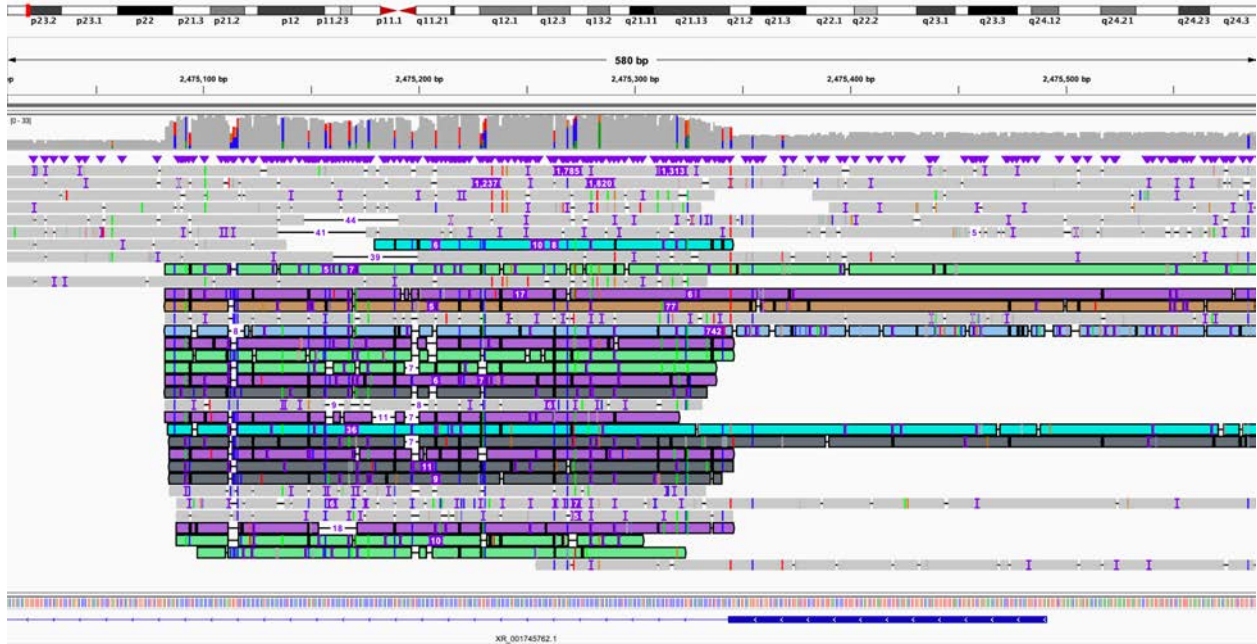

**B.** The 5' end of the duplication observed in the coverage plot in A begins at approximately chr8:2,475,083, within a VNTR. Read color shows that reads were split and re-aligned to the repetitive region. IGV view is of chr8:2,475,009-2,475,591.

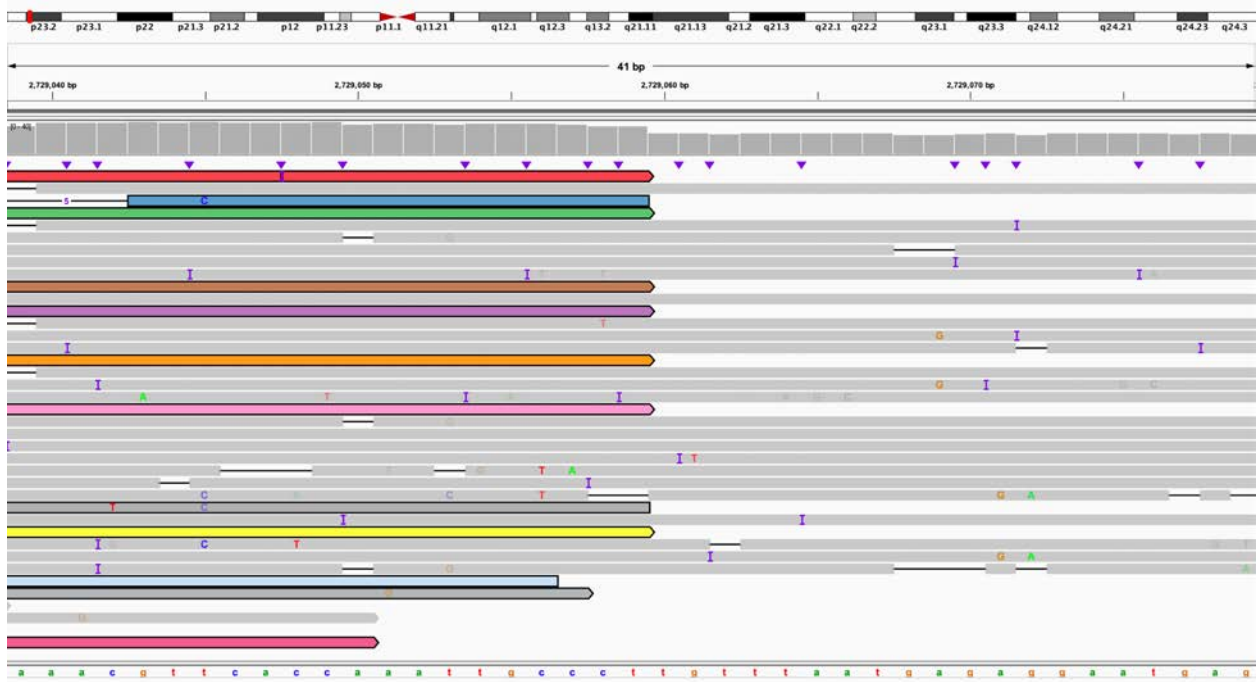

**C.** The 3' end of the duplication observed in A ends at chr8:2,729,059, meaning the duplication is approximately 254 kbp. IGV view is of chr8:2,729,039-2,729,079. Reads are linked to those shown in panel D and color is consistent between the two.

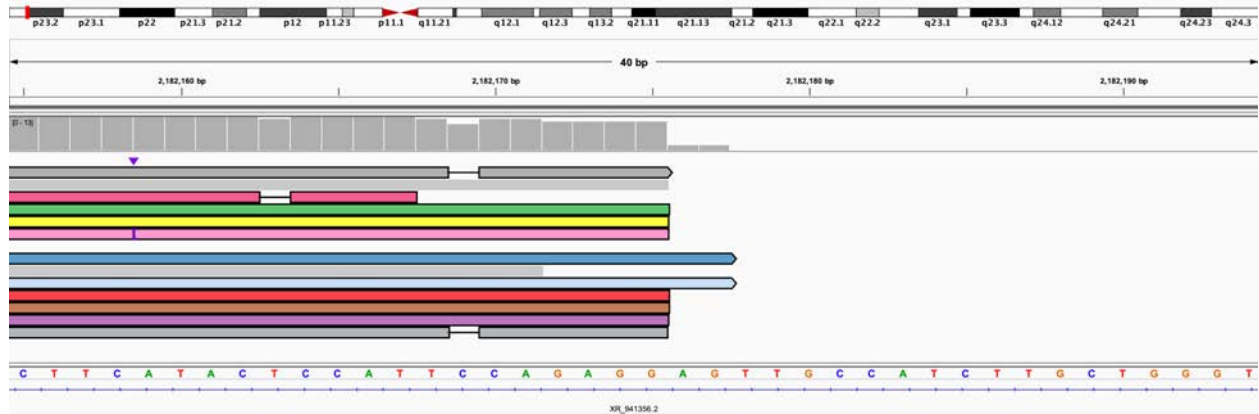

**D.** Reads from the 3' end of the duplication shown in C link to the beginning of a deletion on chr8 at chr8:2,182,175. The orientation of the reads suggests that the duplication is inverted. IGV view is of chr8:2,182,155-2,182,194.

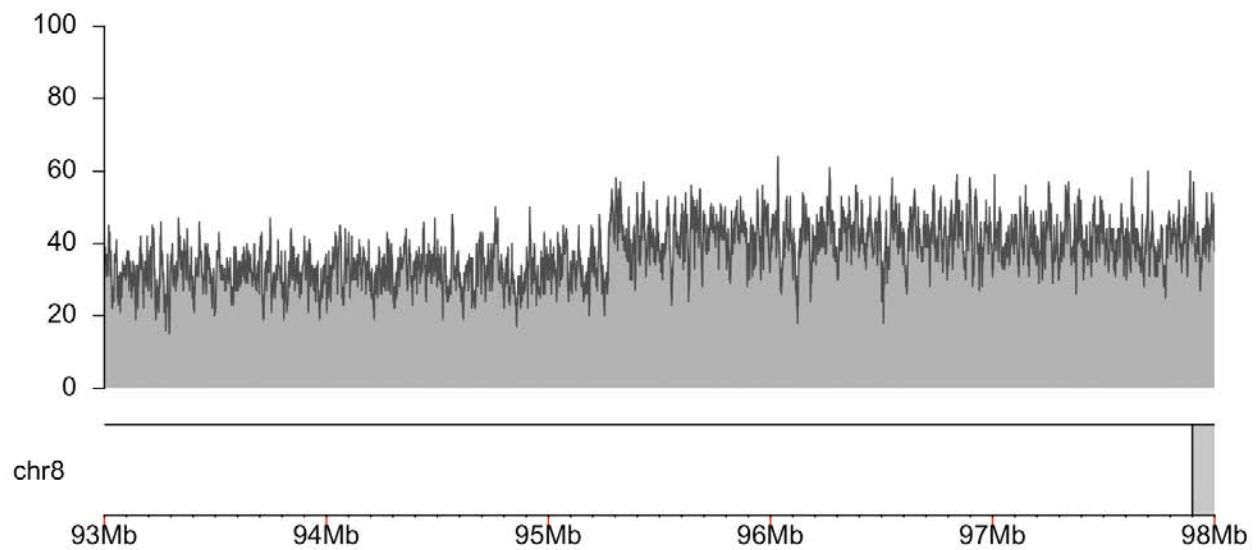

**E:** Coverage of chr8:93,000,000-98,000,000 demonstrating the increase of copy state from 2 to 3 observed on array at 95,270,423. No definitive breakpoint could be identified in the long-read data.

**Figure S27. S022, focal amplification of 4q with adjacent region of homozygosity, duplication of 15q11.2.**

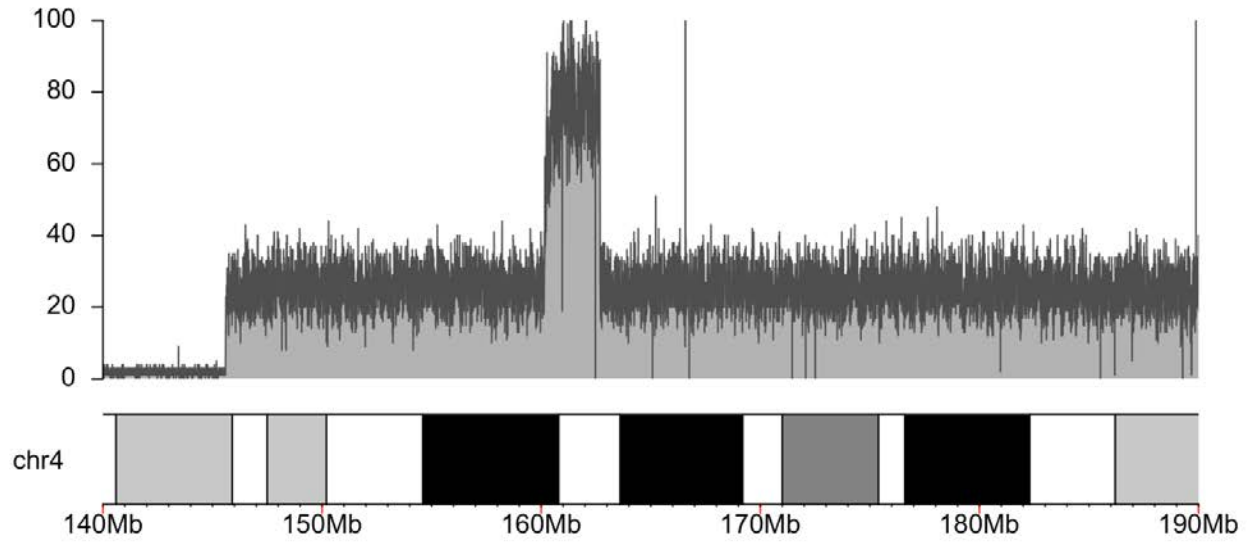

**A.** Coverage of the 4q target region shows the presence of an amplification.

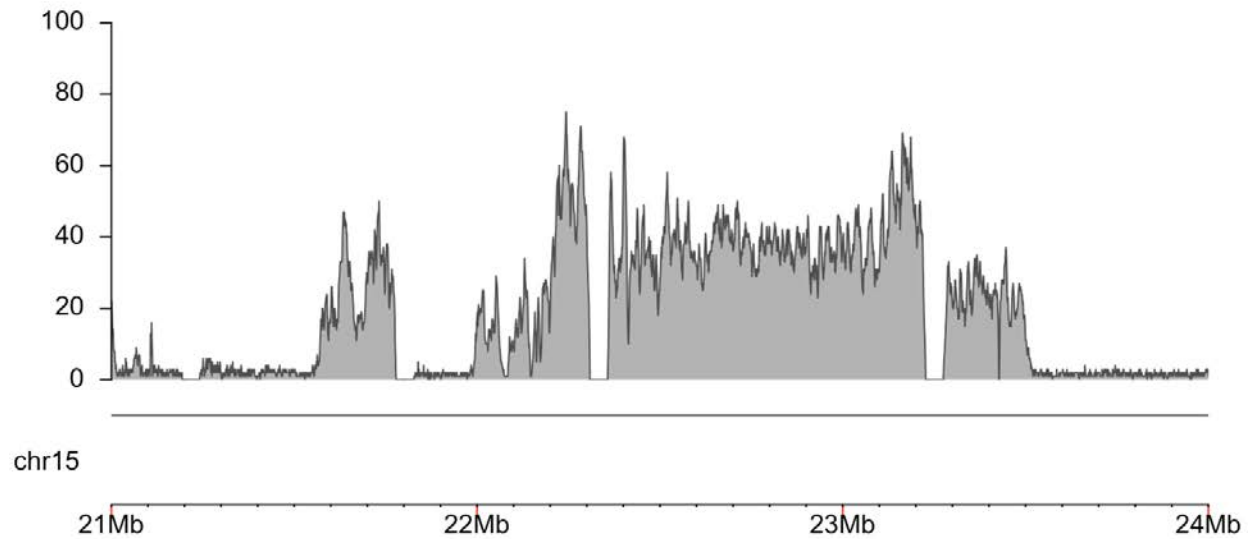

**B.** Coverage of 15q11.2 target region, regions with no coverage represent regions of the reference genome denoted as 'N'.

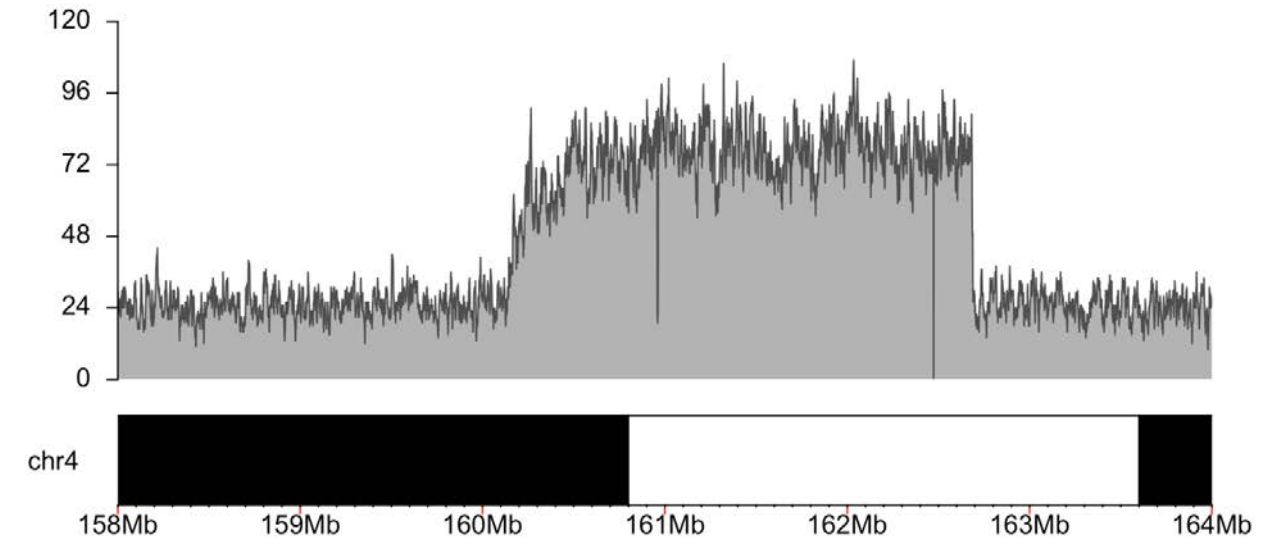

C. Coverage of the focal amplification of 4q.

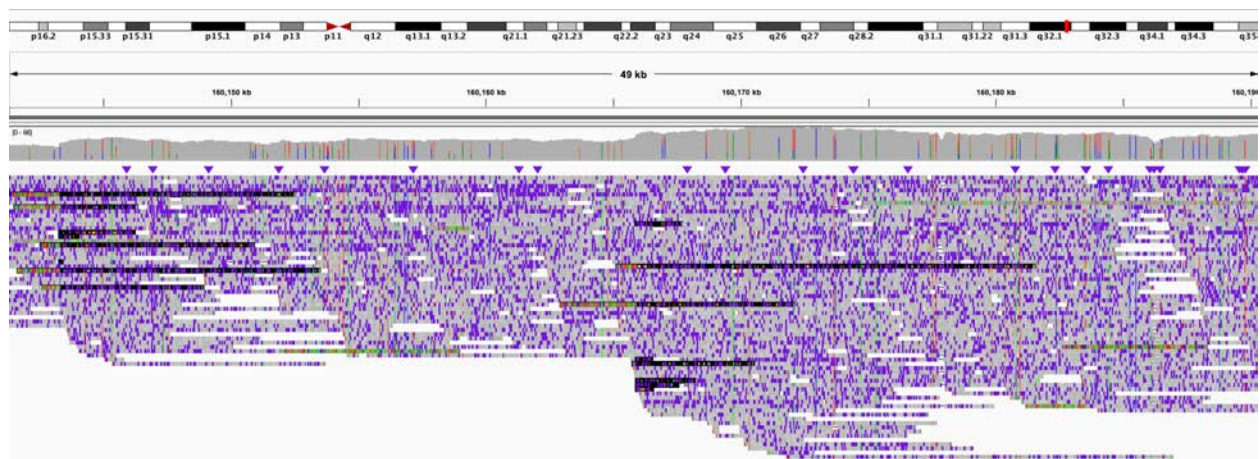

D. View of the beginning of the focal amplification of 4q, this is the centromere-proximal side and includes the second increase in coverage. Within this region, copy number estimate increases from 2x to 4x in a stepwise fashion (Table S9). Reads that span both breakpoints are highlighted. IGV view is of chr4:160,141,260-160,190,550.

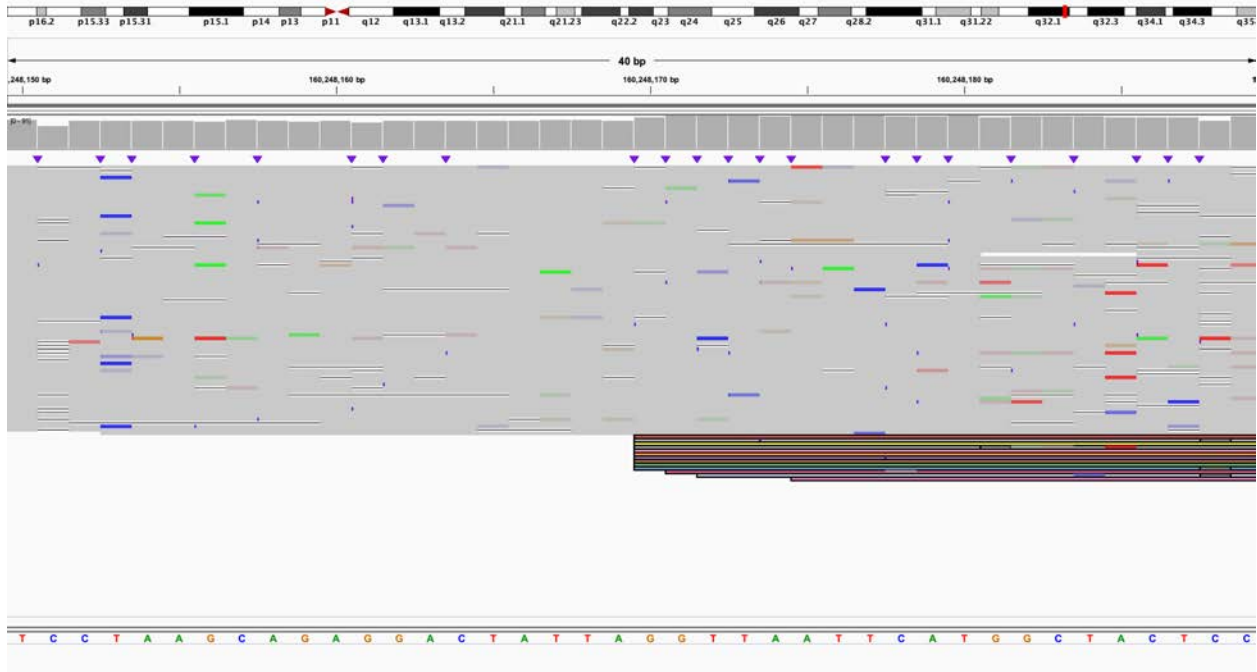

**E.** View of the third centromere-proximal breakpoint and amplification. Copy number estimate in this region increases from 4x to 5x (Table S9). IGV view is of chr4:160,248,150-160,248,189.

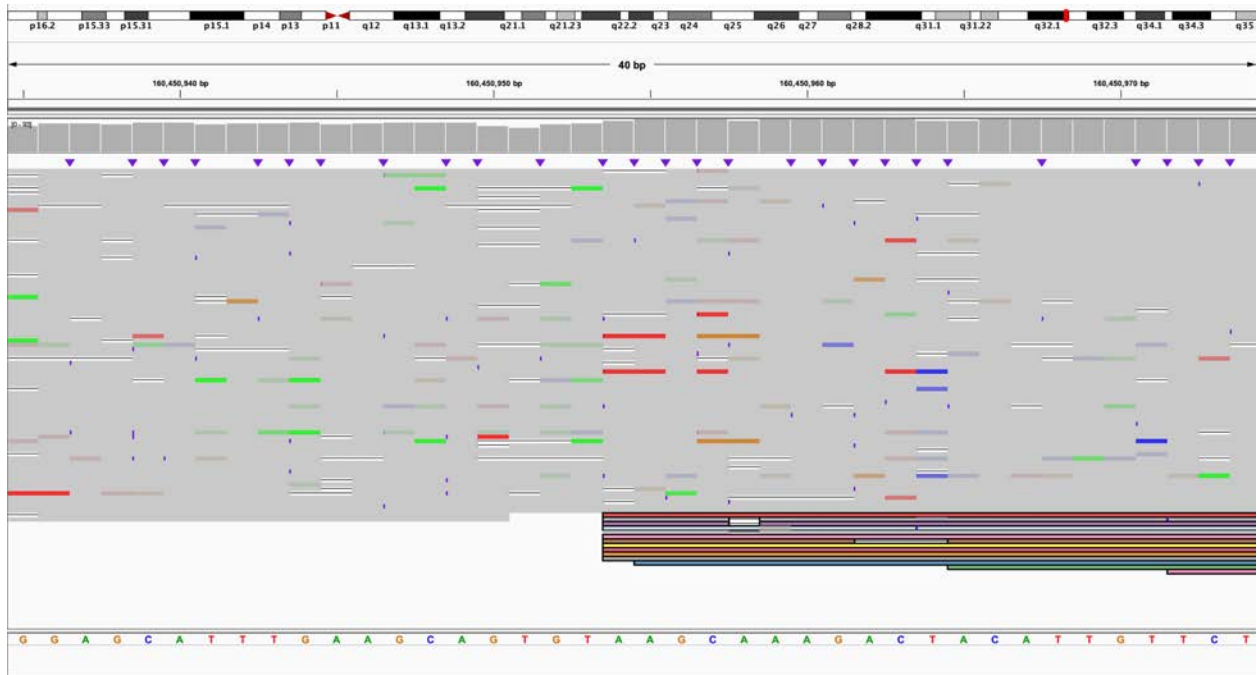

**F.** View of the fourth centromere-proximal breakpoint and amplification. Copy number estimate increases from 5x to 6x in this region (Table S9). IGV view is of chr4:160,450,935-160,450,974.

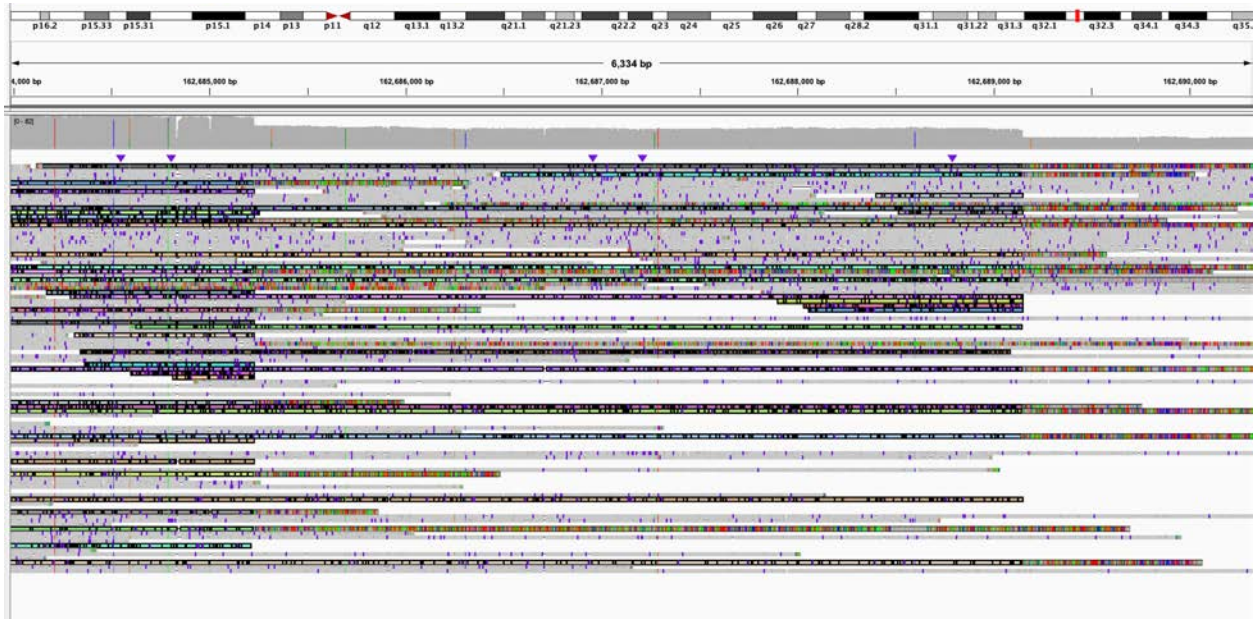

**G.** View of the telomere-proximal region of the focal amplification of 4q. Reads that span both breakpoints are highlighted. Copy number estimate decreases from 6x to 4x, then from 4x to 2x over a 3,920 bp interval (Table S9). IGV view is of chr4:162,683,982-162,690,349.

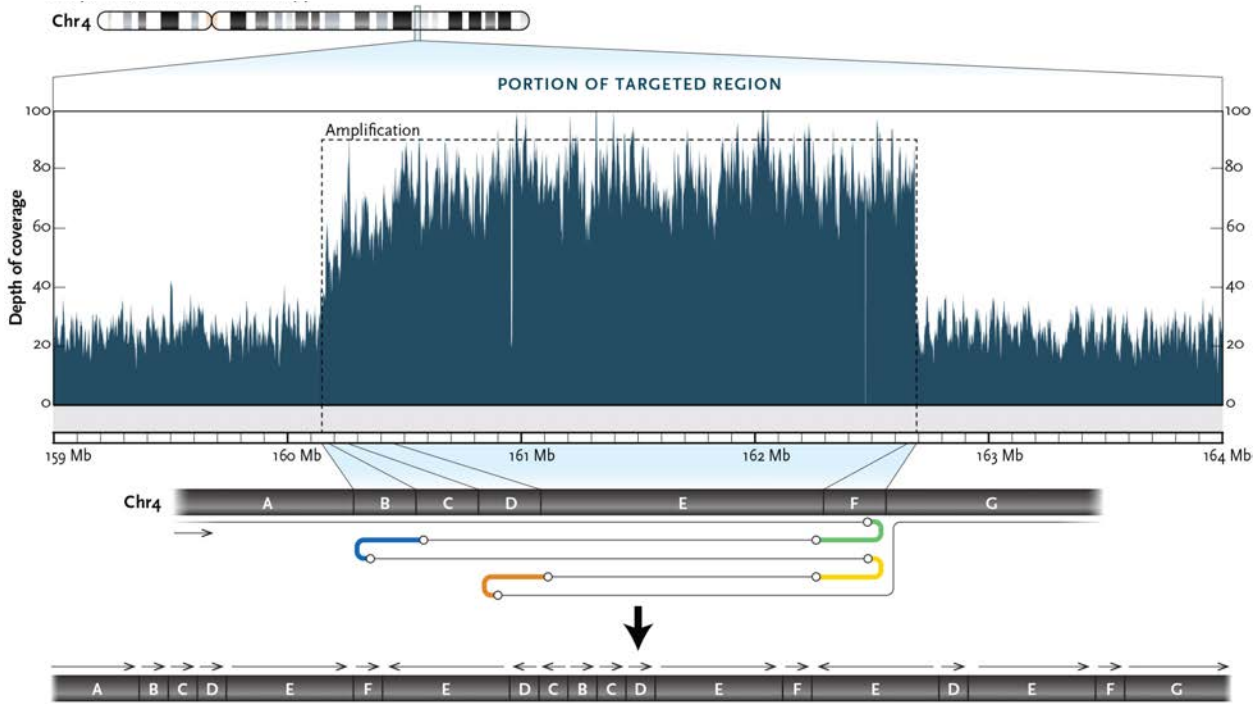

**H.** Estimate of the possible structure of the 4q amplification. We were not able to determine the exact order in which segments were duplicated. A possible arrangement of the region is shown based on this estimate.

Figure S28. S035, duplications of 8q24 and 16p13.11 identified by clinical testing.

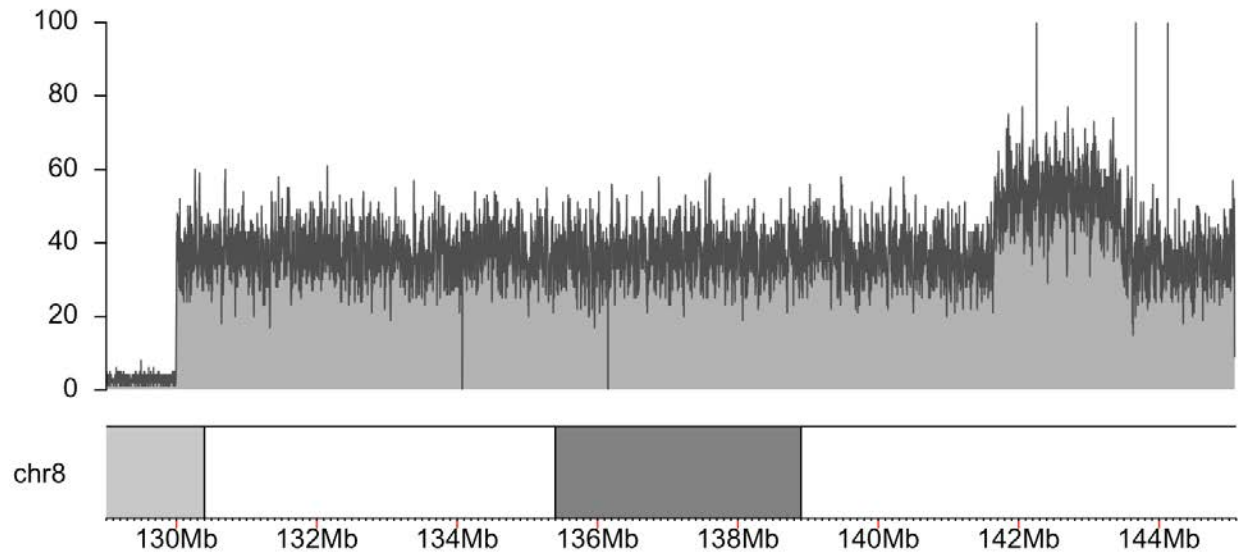

A. Coverage of chromosome 8 target region.

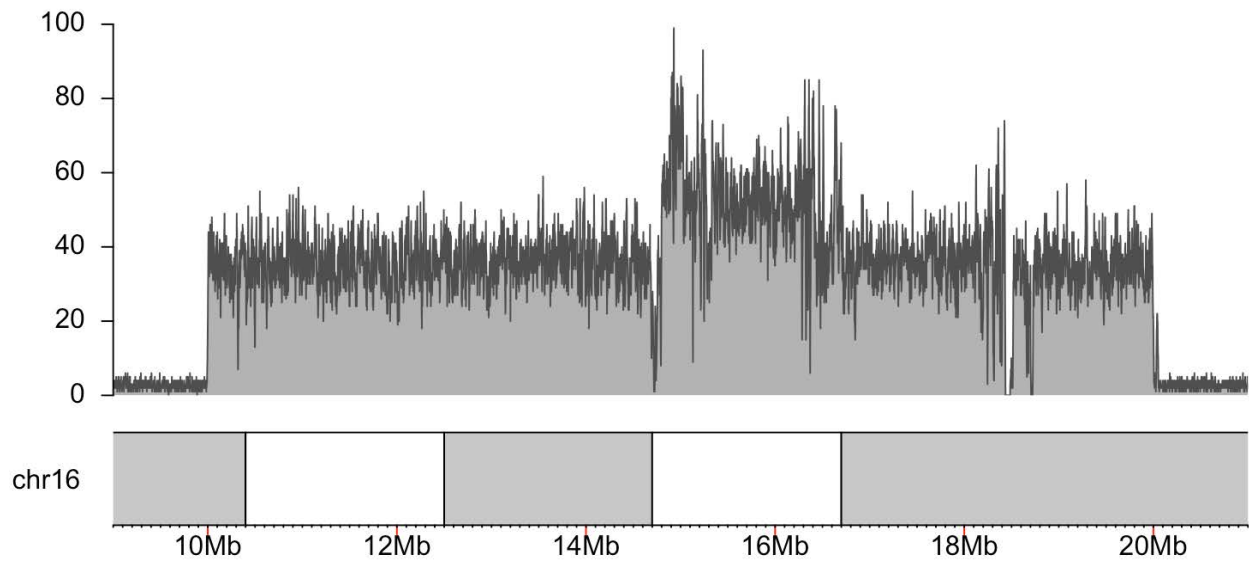

B. Coverage of chromosome 16 target region.

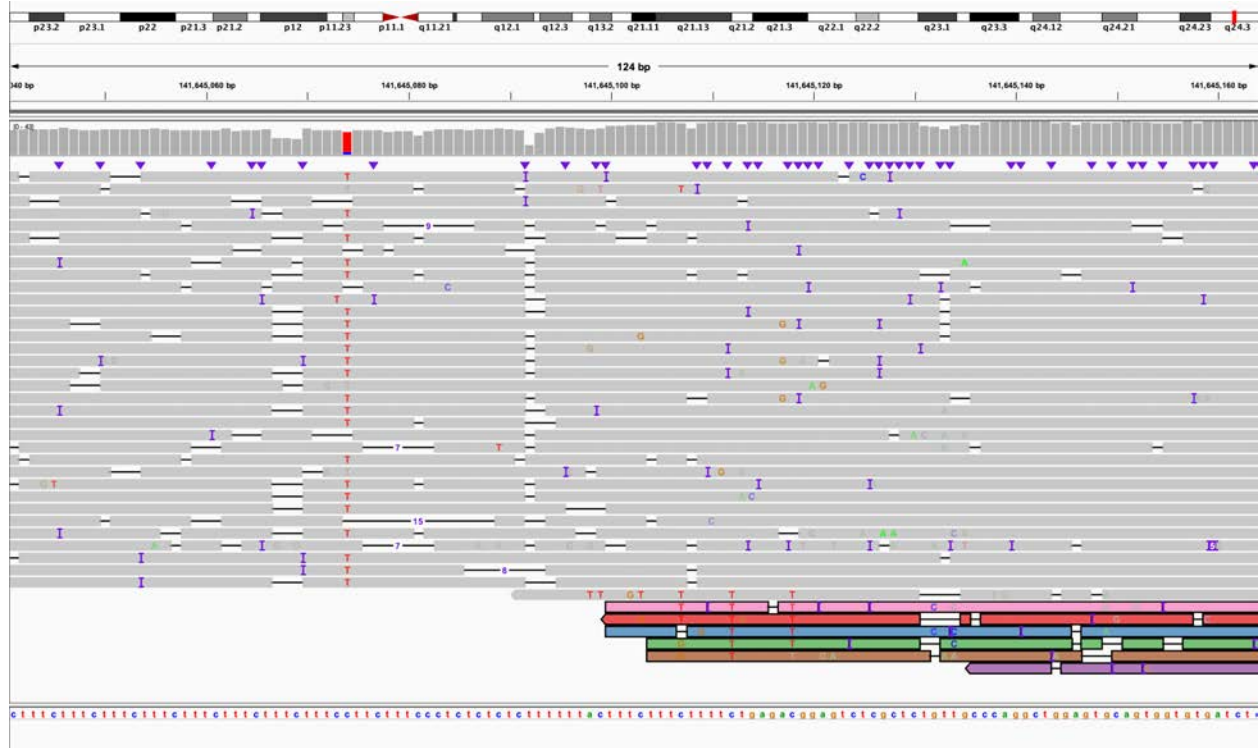

C. Centromere-proximal end of the chromosome 8 duplication, reads spanning the duplication are indicated by color. IGV coordinates are chr8:141,645,041-141,645,164.



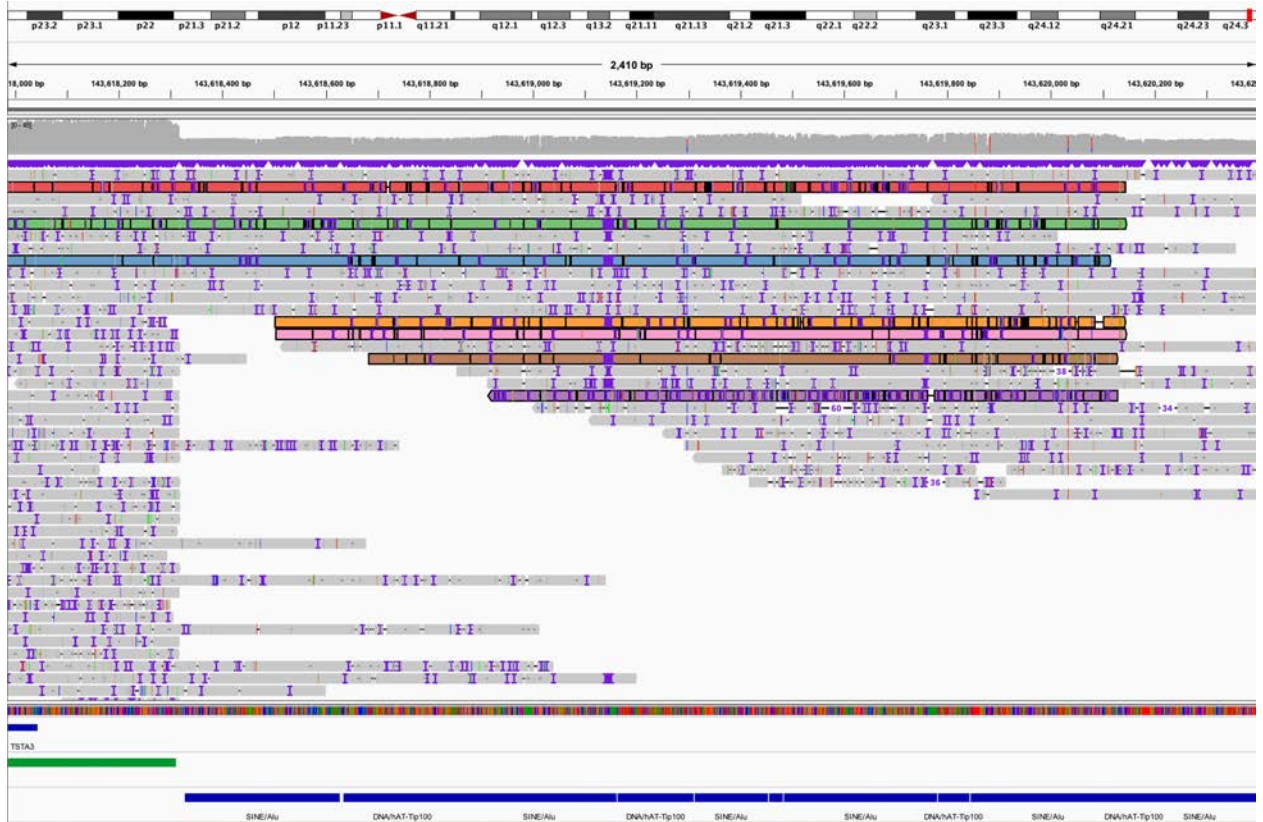

**D.** Telomere-proximal end of the chromosome 8 duplication shows that the duplication occurred within a TE-dense region. Reads on the 5' end of the image span an approximately 8 kbp deletion. Reads colored as in C. IGV coordinates are chr8:143,617,985-143,620,407.

Figure S29. S036, individual with multiple rearrangements and translocations of chromosomes 5, 6, 10, and 18.

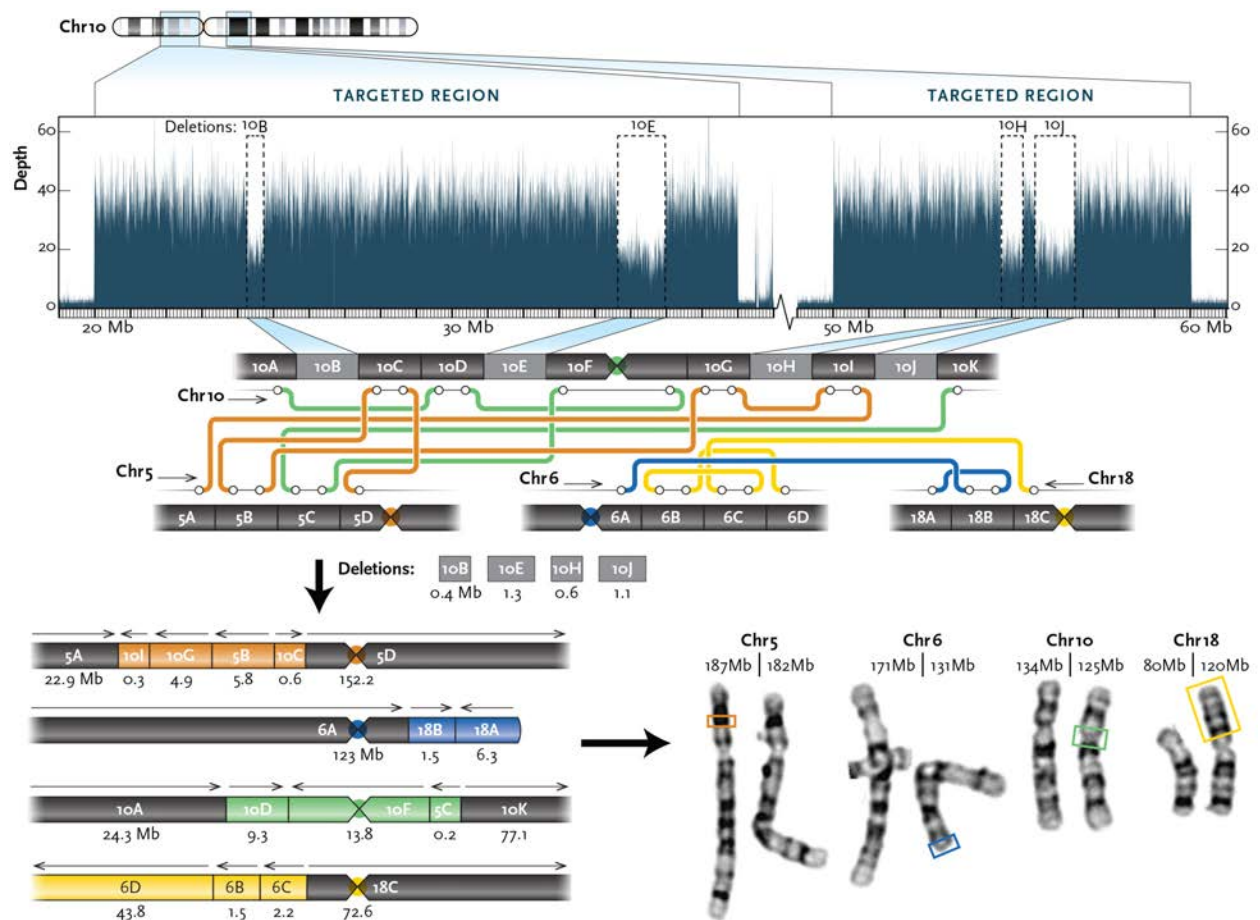

A. In a child with multiple deletions of chromosome 10, karyotyping revealed translocations between chromosomes 6 and 18 along with a pericentric inversion of chromosome 10. LRS identified additional translocations involving chromosomes 10 and 5 as well as several additional intrachromosomal rearrangements. Rearrangements can be resolved by following the subway plot for each derivative chromosome. Estimates of the reconstructed chromosome sizes are shown along with where they are estimated to correspond to on the karyotype (colored boxes).

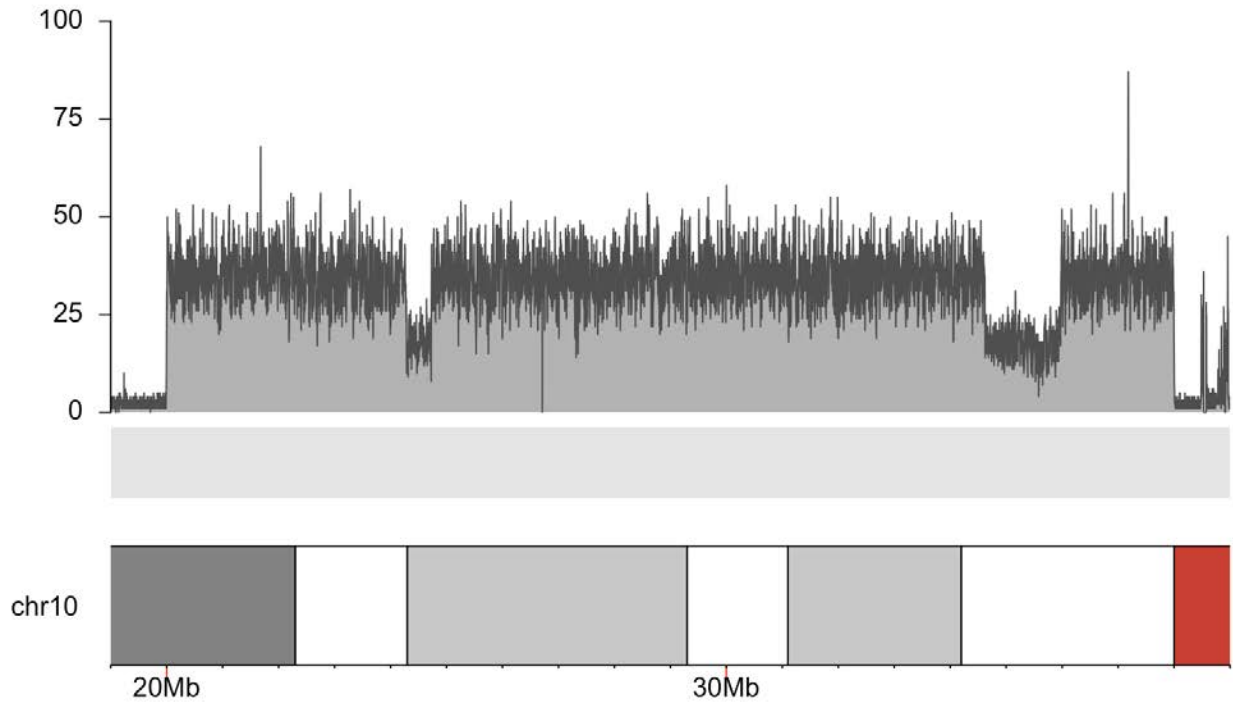

**B.** Coverage of chromosome 10p target region from the first readfish run.

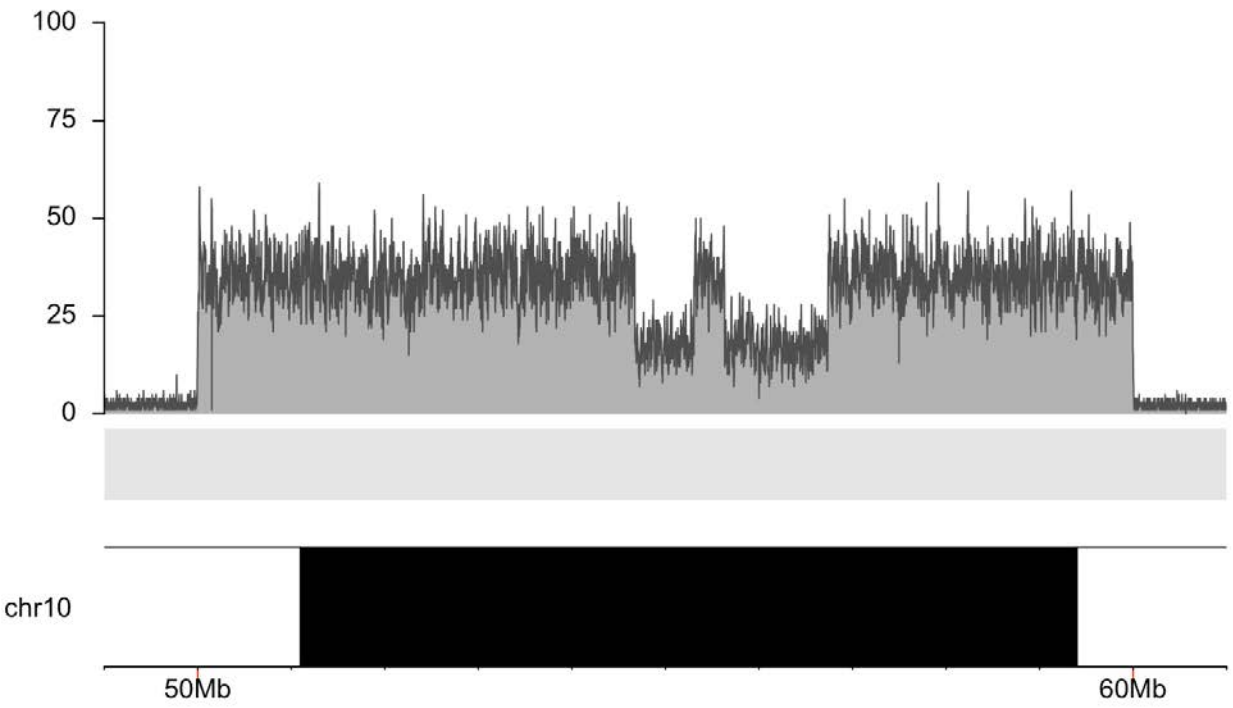

**C.** Coverage of chromosome 10q target region from the first readfish run.

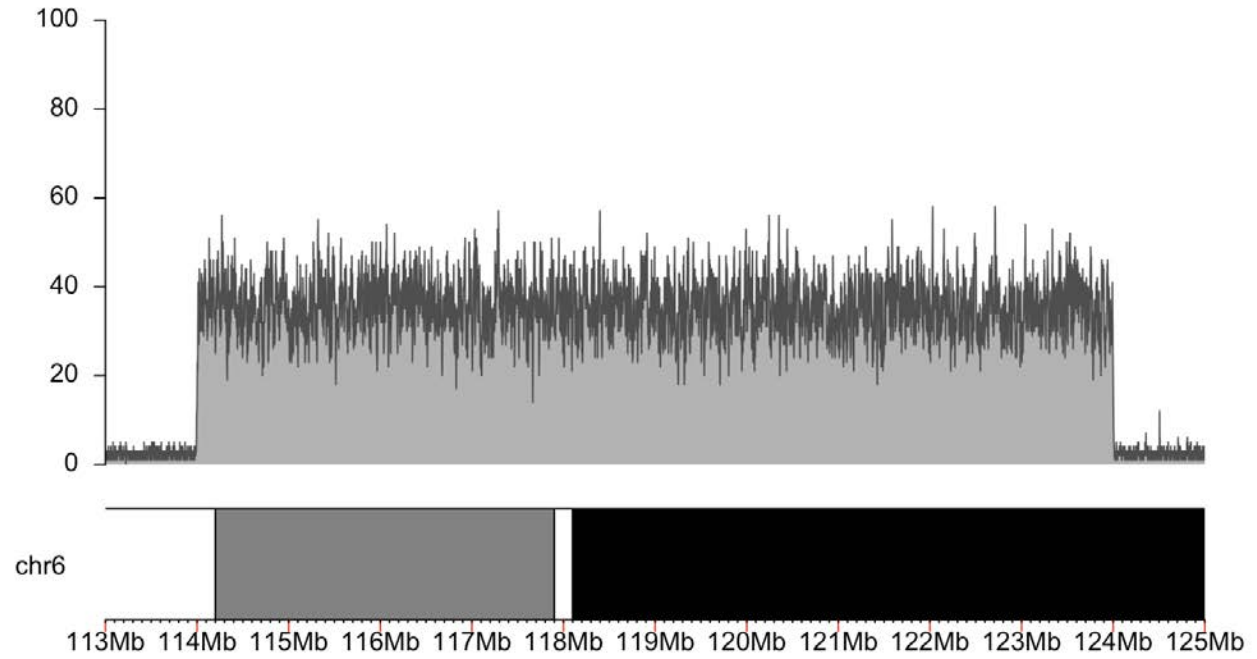

**D.** Coverage of chromosome 6 target region from the first readfish run.

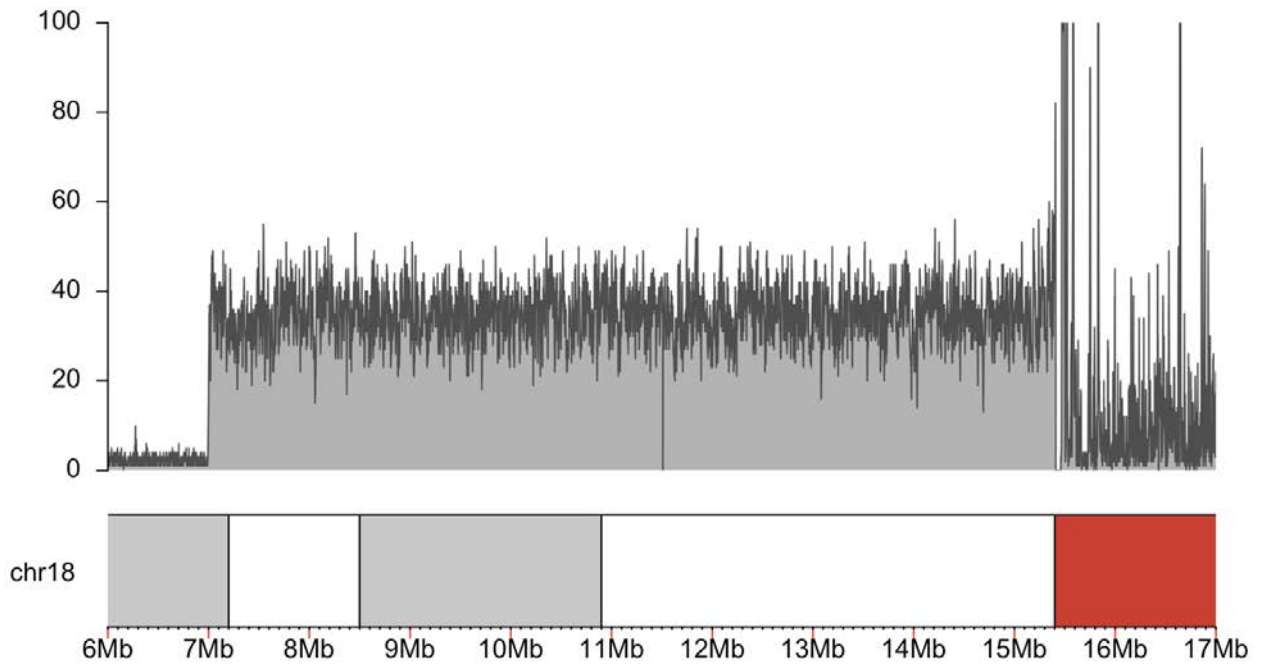

**E.** Coverage of chromosome 18 target region from the first readfish run.

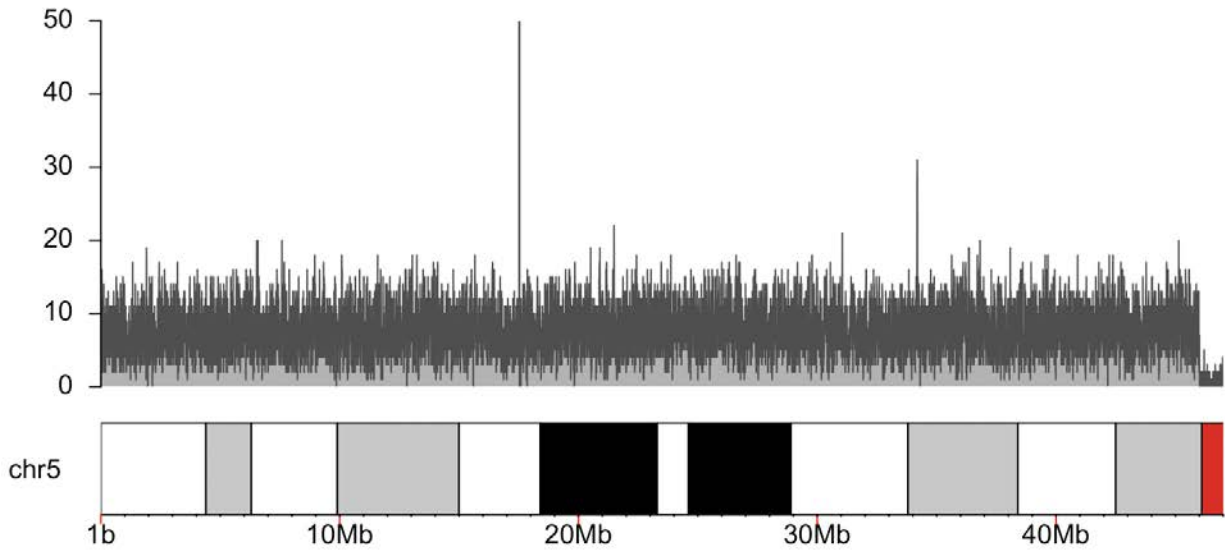

**F.** Coverage of chromosome 5 target region from the second readfish run.

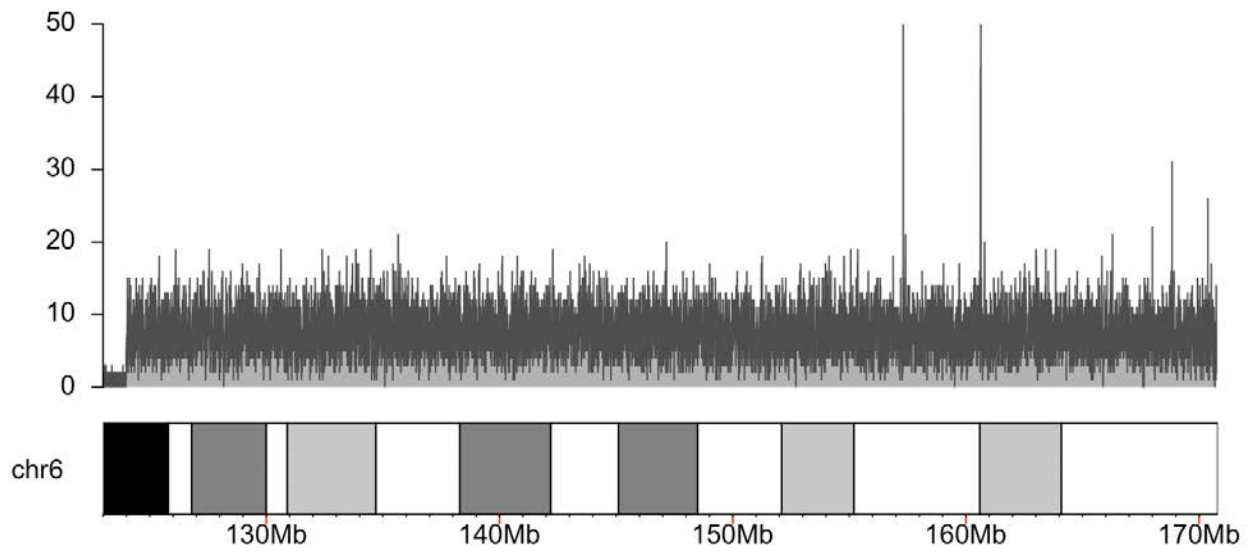

**G.** Coverage of chromosome 6 target region from the second read fish run.

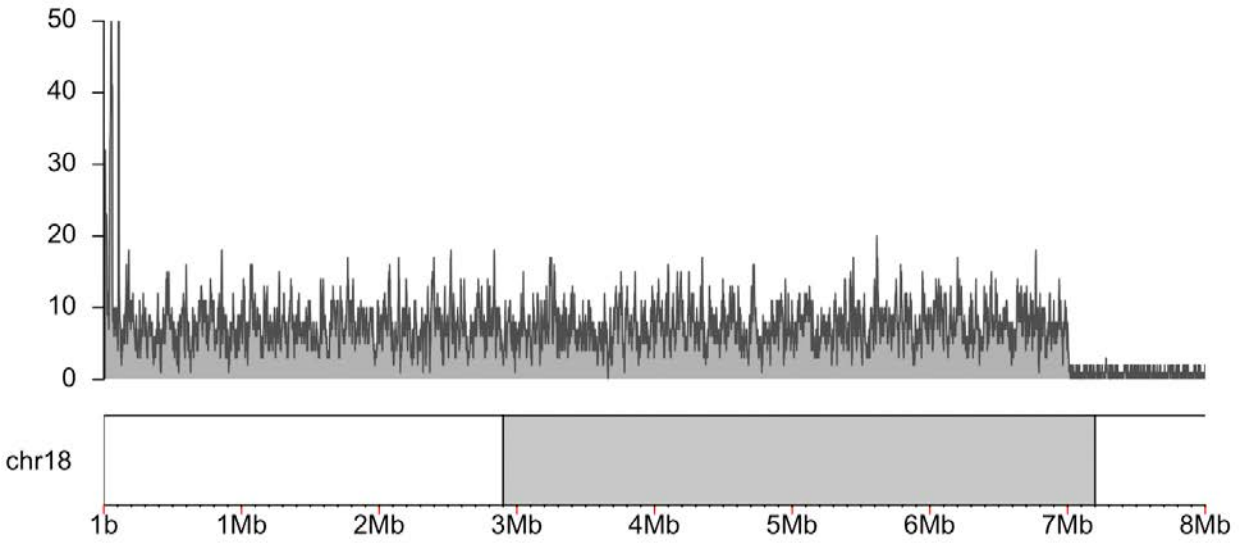

H. Coverage of chromosome 18 target region from the second readfish run.

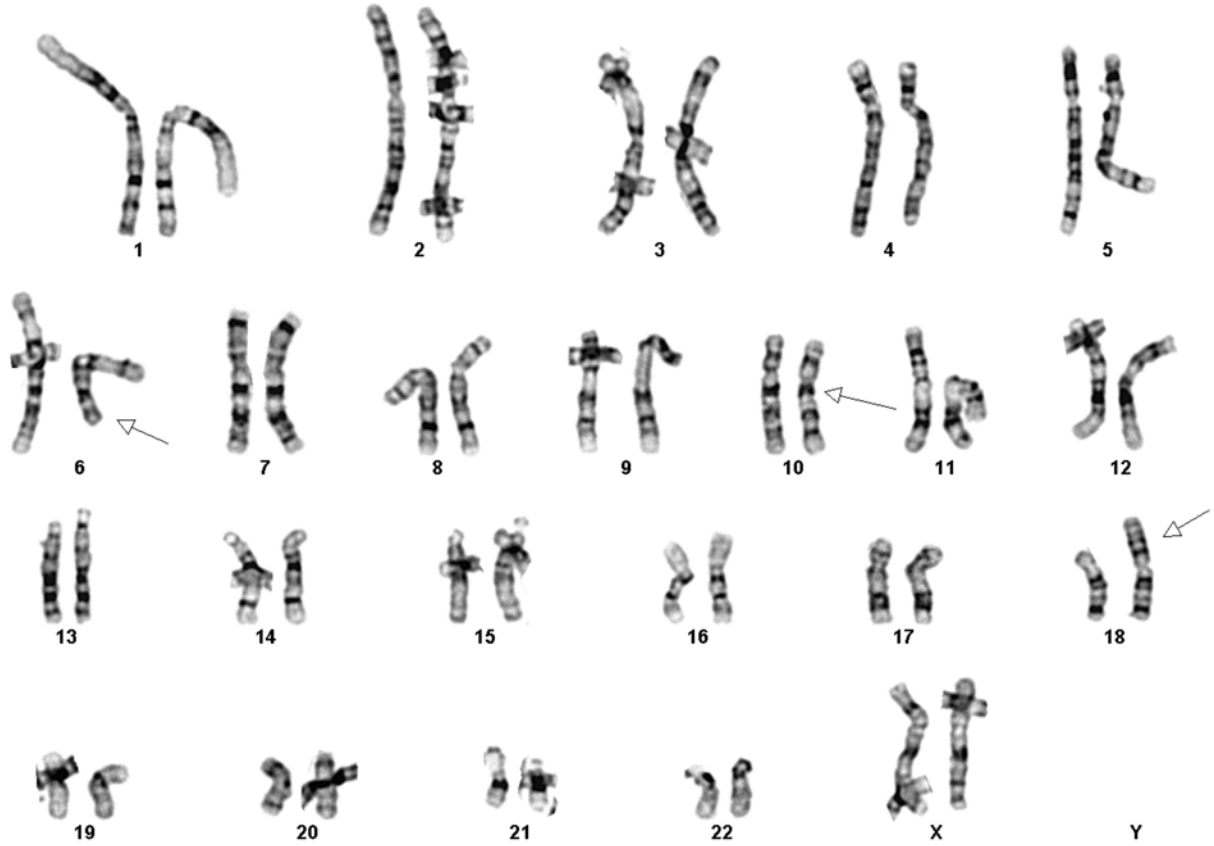

I. Karyotype of the individual, arrows denote derivative chromosomes.

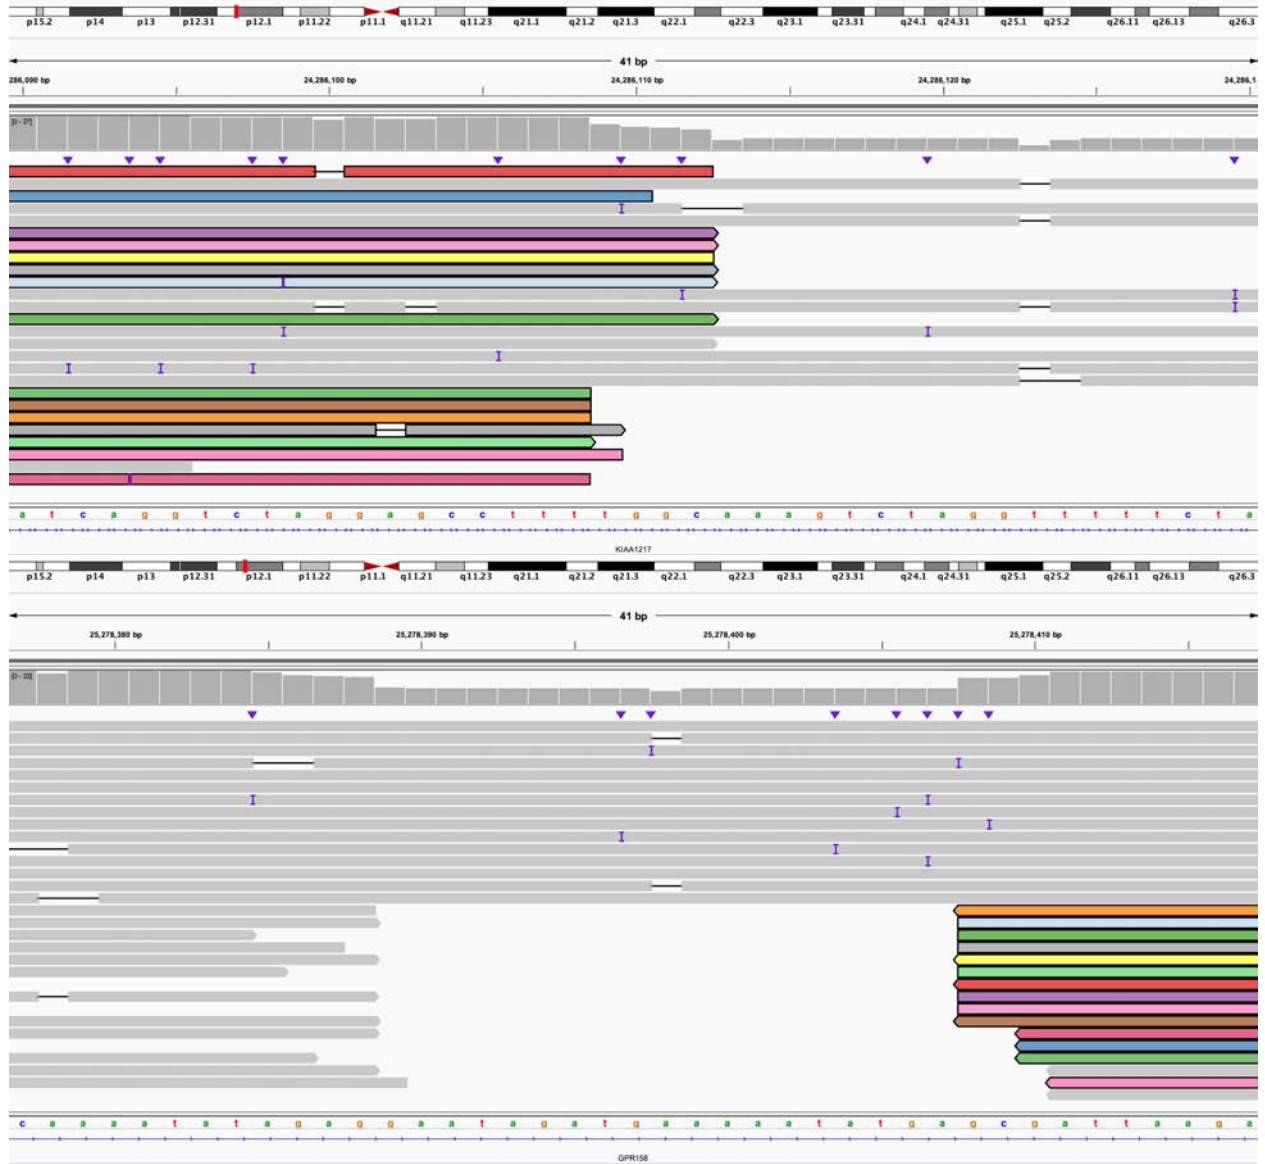

**J:** 3' end of 10:A bisects *KIAA1217* (IGV: chr10:24,286,090-24,286,130) and is linked to the 5' end of 10:D which bisects *GPR158* (IGV: chr10:25,278,377-25,278,417). This is the beginning of derivative chromosome 10.

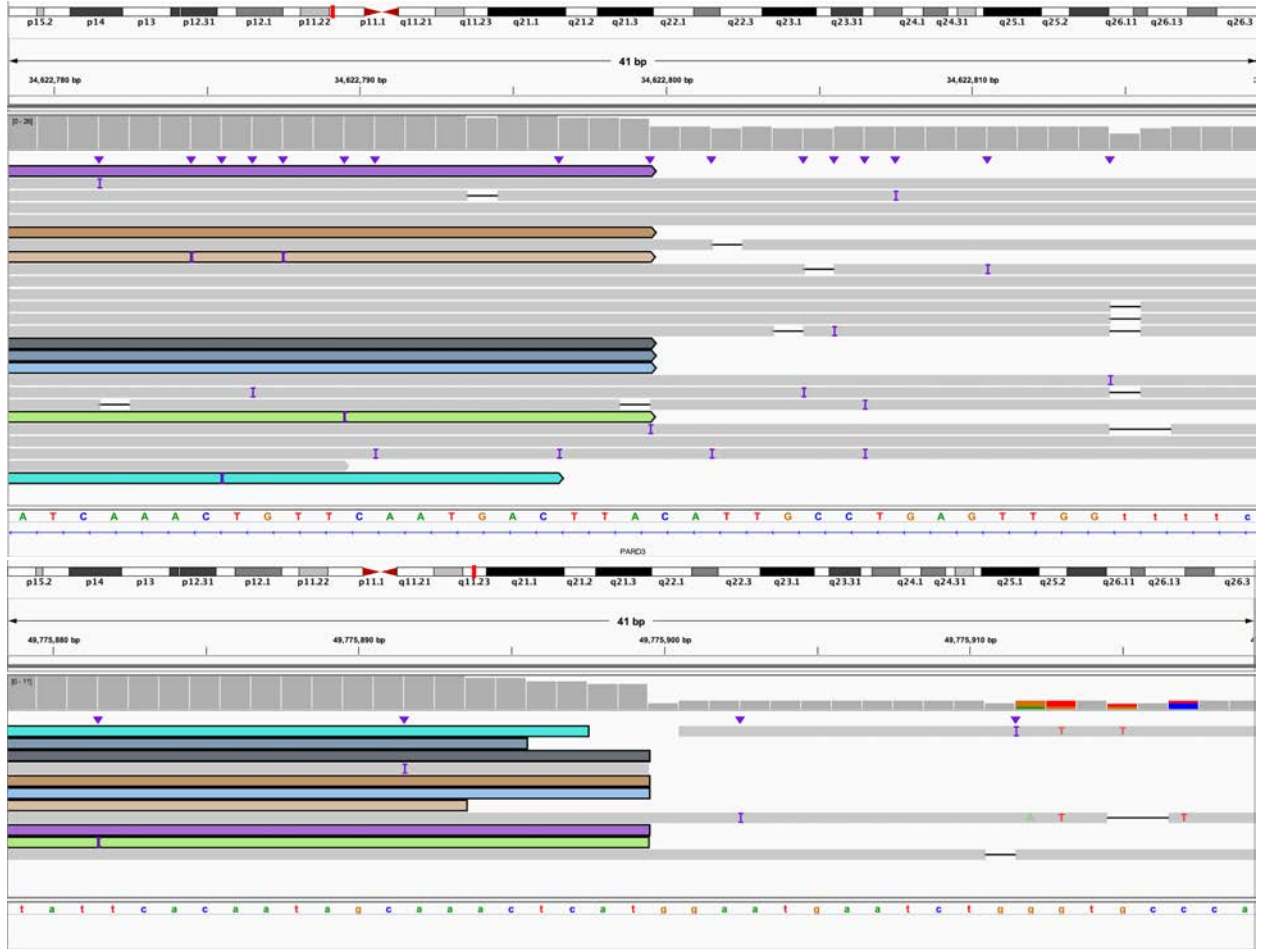

**K:** 3' end of 10:D bisects *PARD3* (IGV: chr10:34,622,779-34,622,819) and is linked to the 3' end of 10:F (IGV: chr10:49,775,879-49,775,919). This is within derivative chromosome 10.



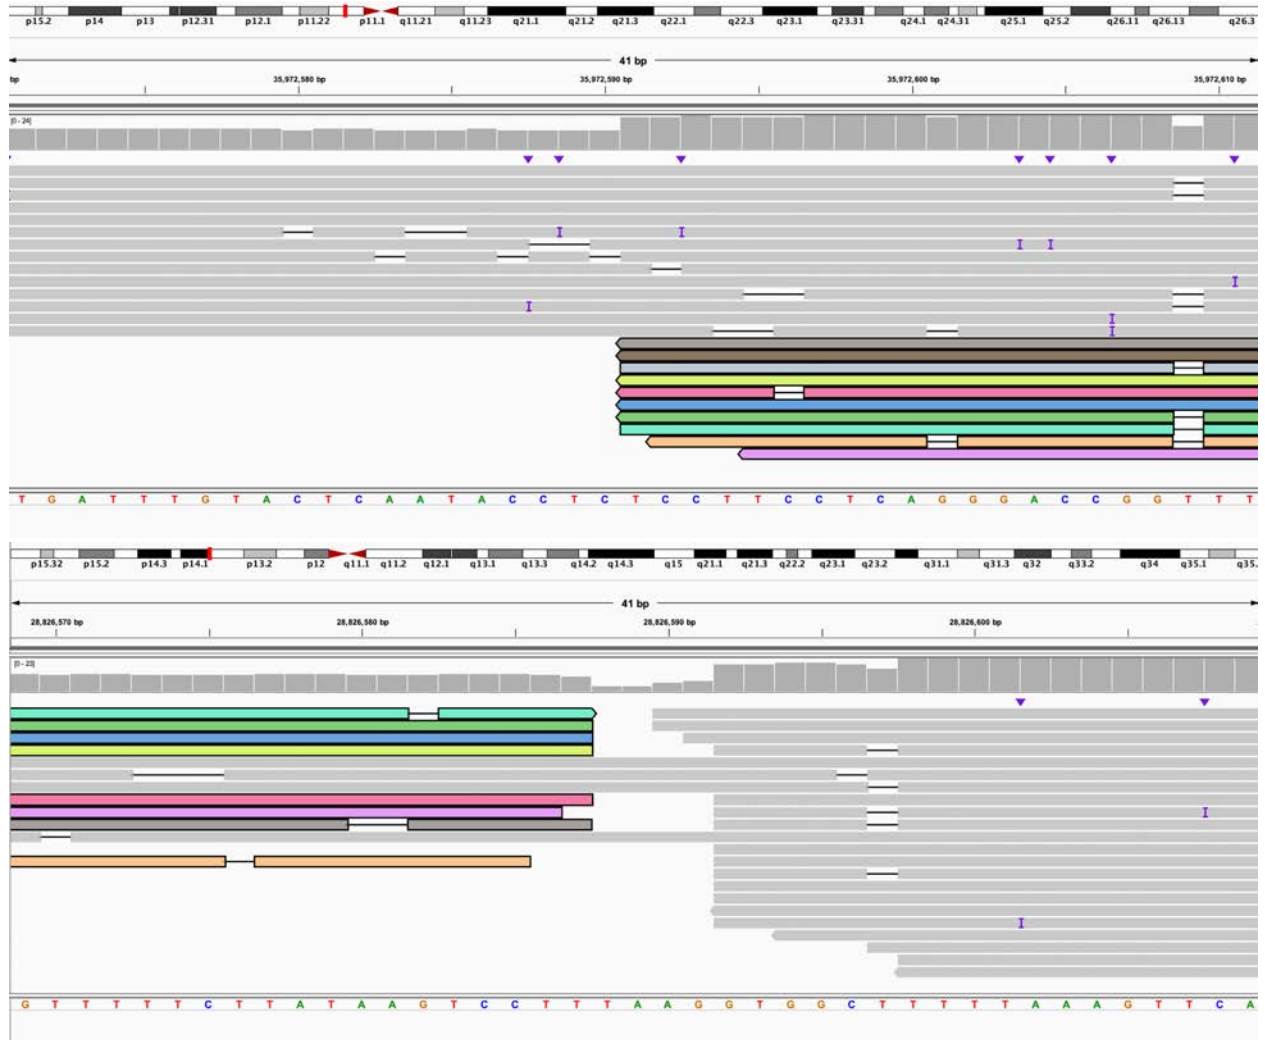

**L:** 5' end of 10:F (IGV: chr10:35,972,571-35,972,611) is linked to the 3' end of 5:C (IGV: chr5:28,826,569-28,826,609). This is within derivative chromosome 10.

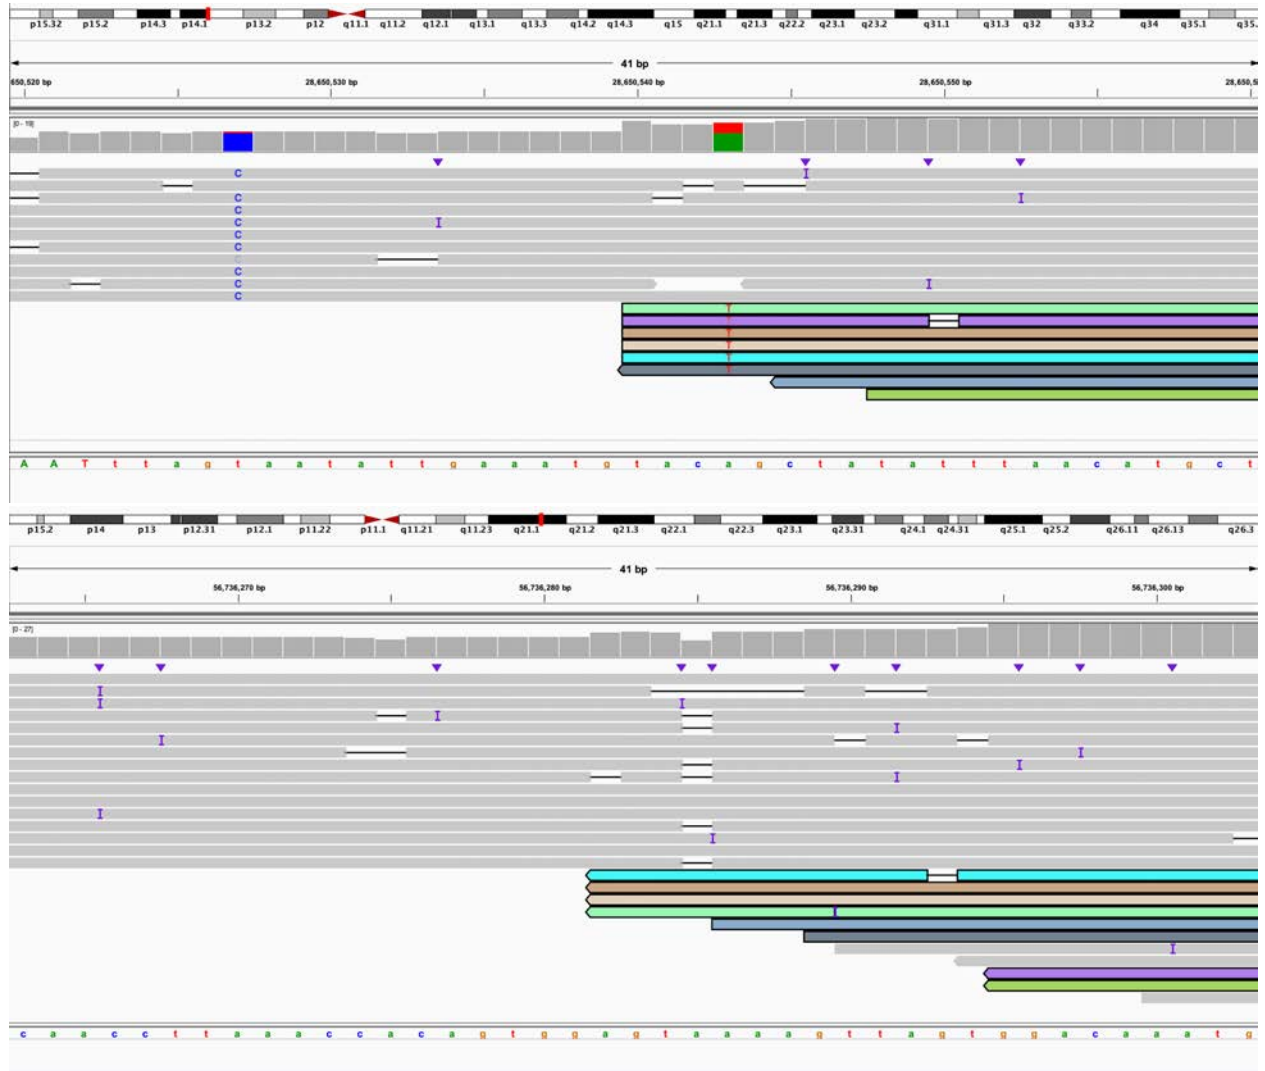

**M:** 5' end of 5:C (IGV: chr5:28,650,520-28,650,560) is linked to the 5' end of 10:K (IGV: chr10:56,736,263-56,736,303). This is the end of derivative chromosome 10.

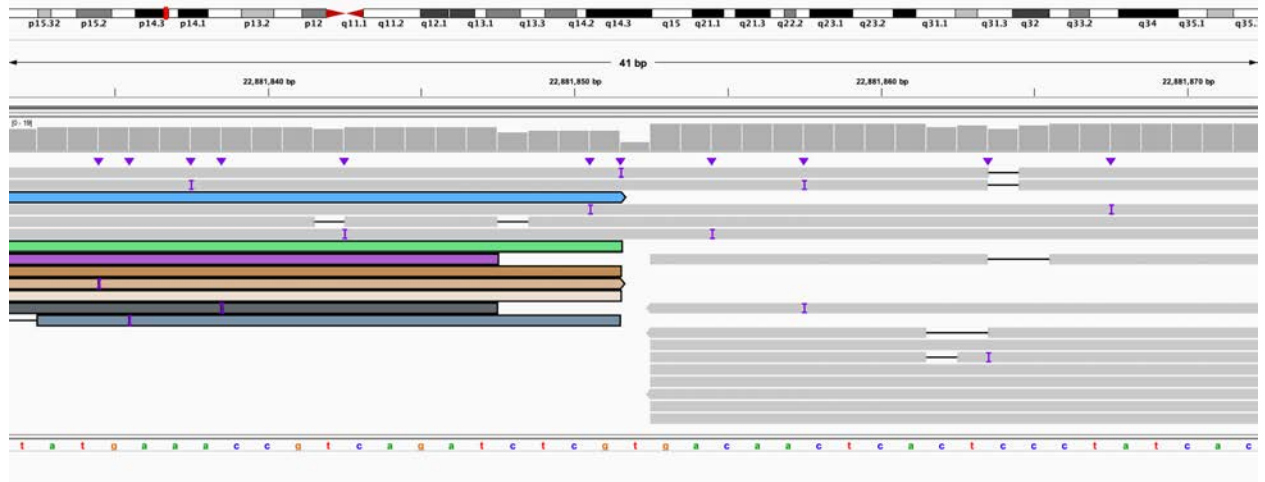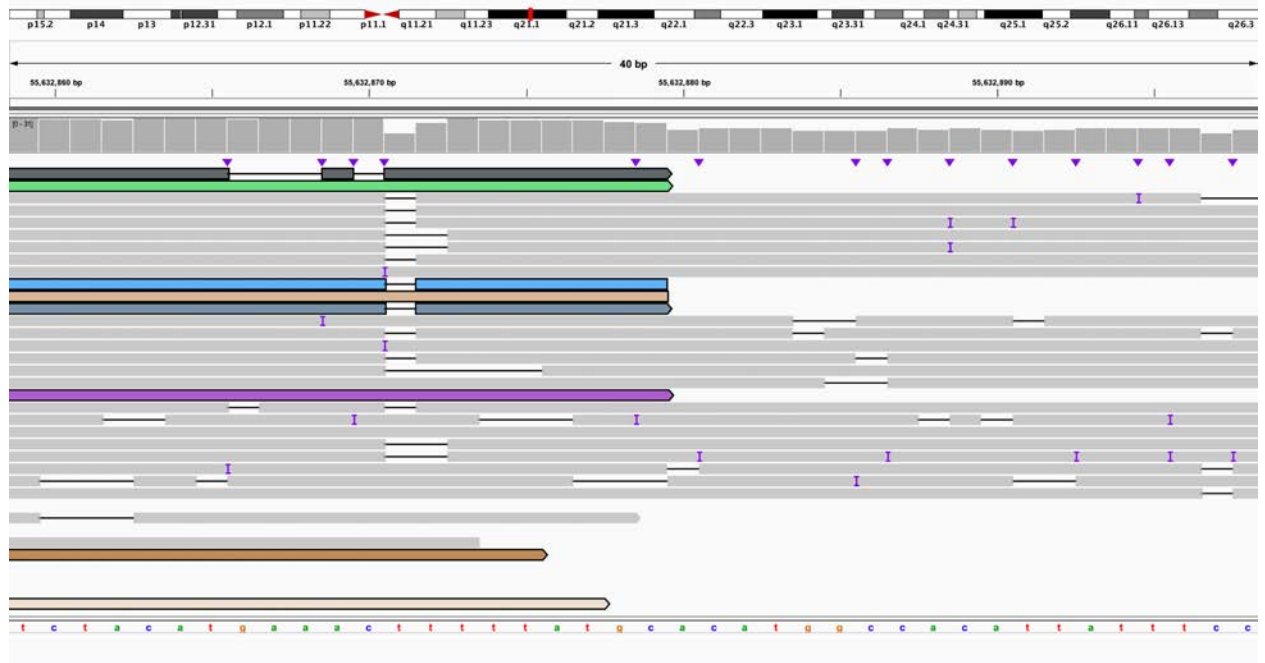

N: 3' end of 5:A (IGV: chr5:22,881,832-22,881,872) linked to 3' end of 10:I (IGV: chr10:55,632,859-55,632,898). This is the beginning of derivative chromosome 5.

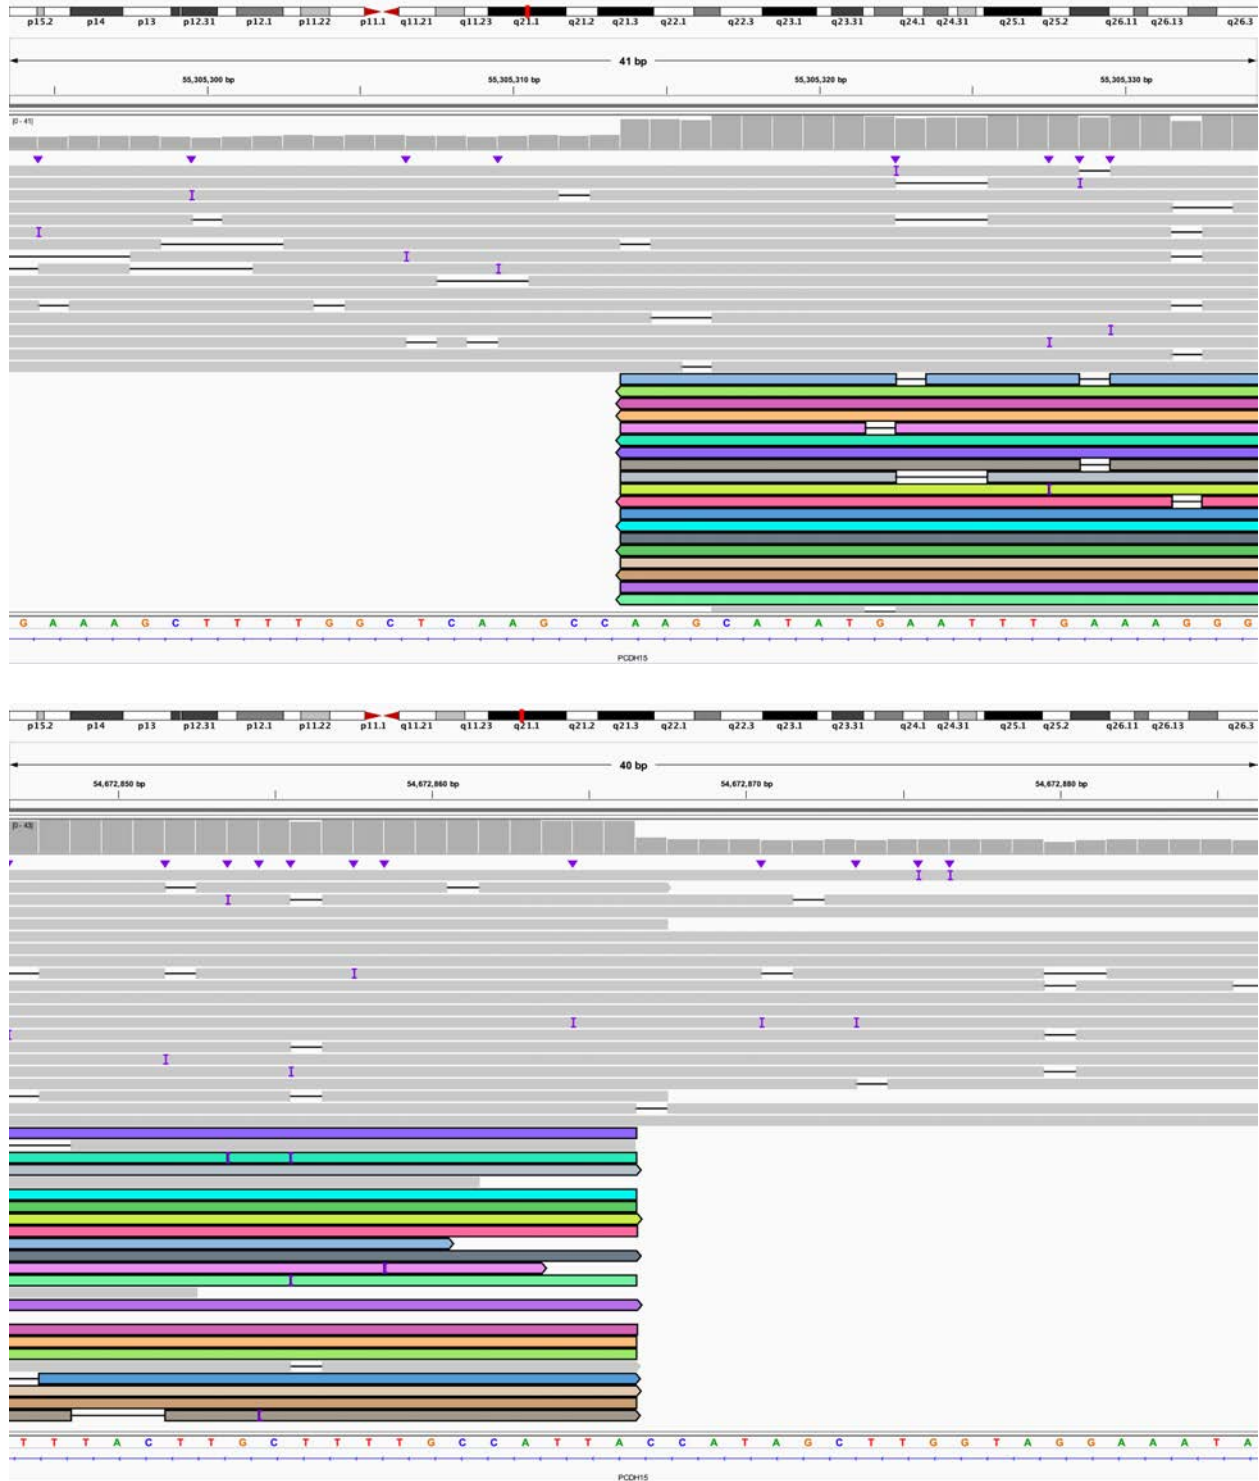

**O:** 5' end of 10:I bisects *PCDH15* (IGV: chr10:55,305,294-55,305,334) linked to 3' end of 10:G which also bisects *PCDH15* (IGV: chr10:54,672,847-54,672,886). This is within derivative chromosome 5.



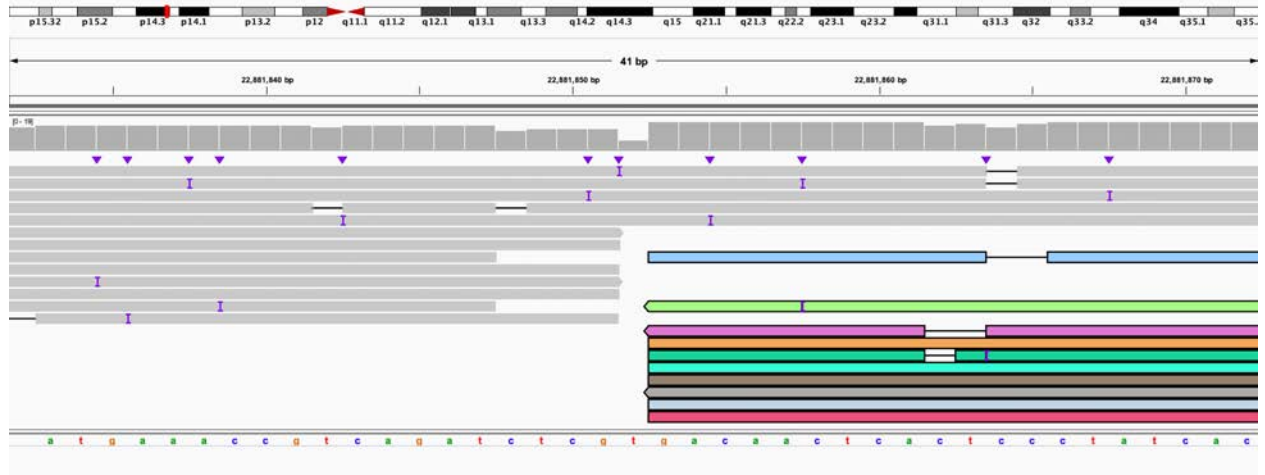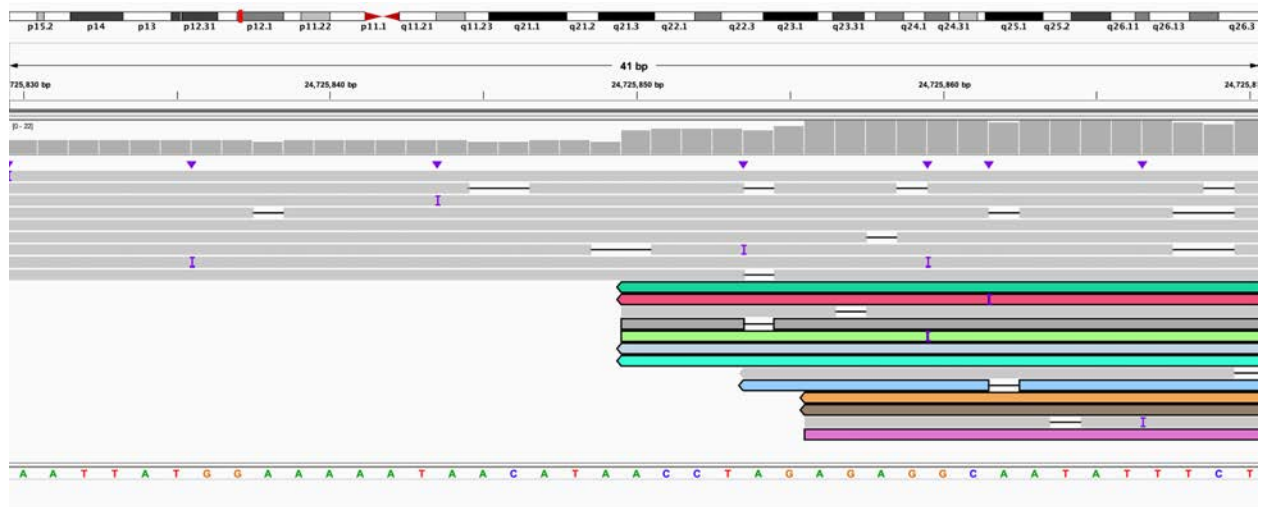

**Q:** 5' end of 5:B (IGV: chr5:22,881,832-22,881,872) linked to 5' end of 10:C (IGV: chr10:24,725,830-24,725,870). This is within derivative chromosome 5.

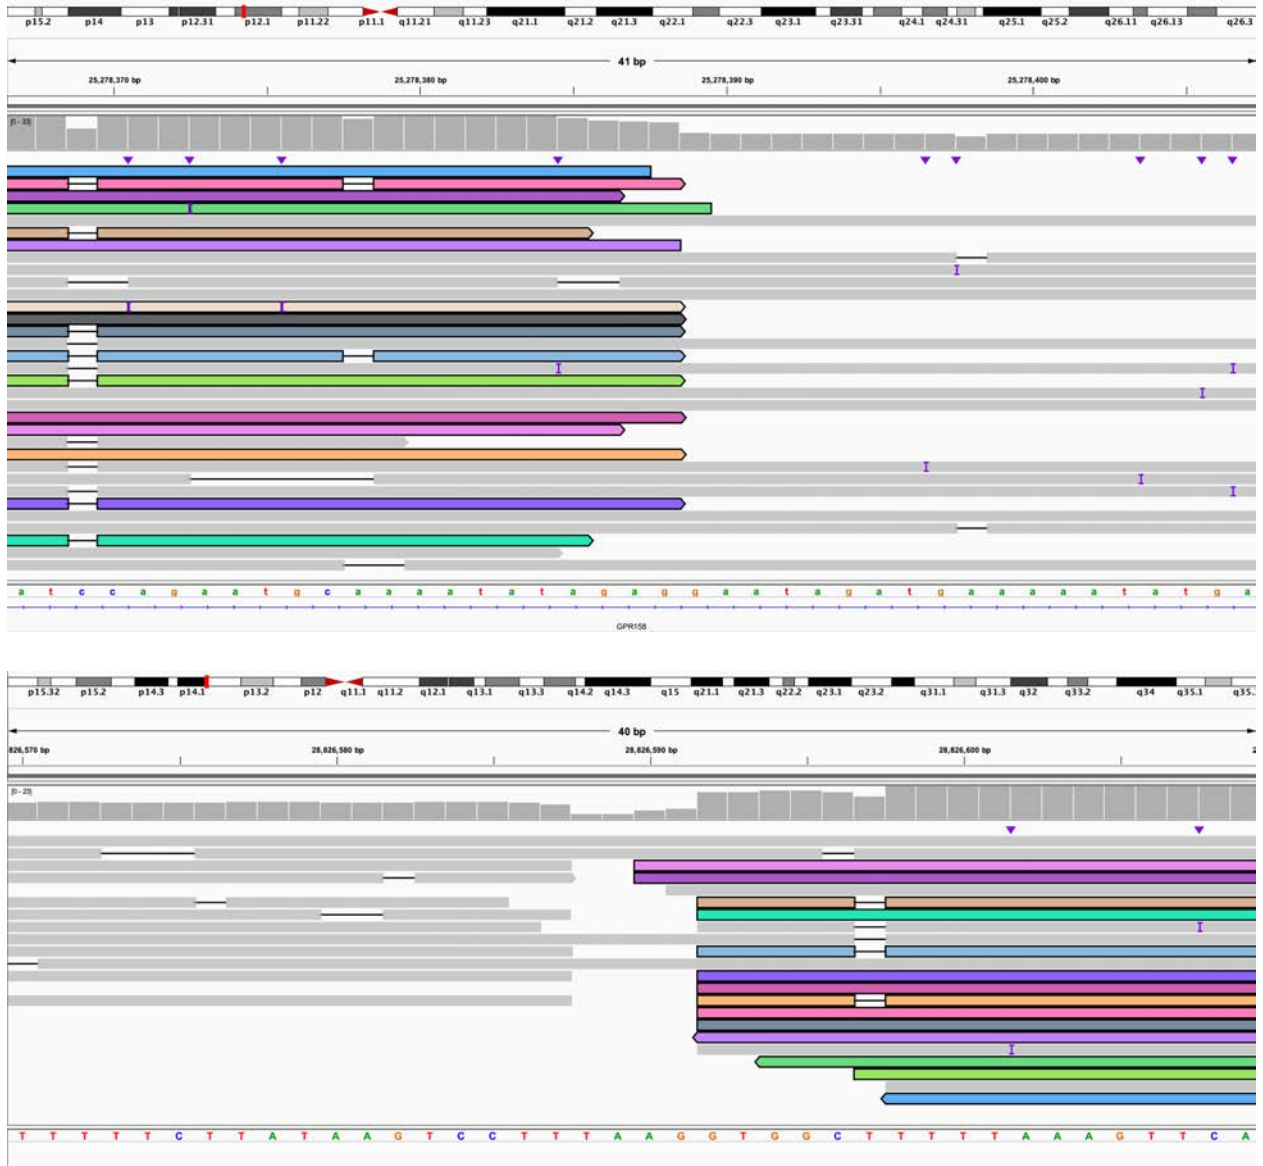

**R:** 3' end of 10:C is within *GPR158* (IGV: chr10:25,278,367-25,278,407) and is linked to 5' end of 5:D (IGV: chr5:28,826,570-28,826,609). This is the end of derivative chromosome 5.

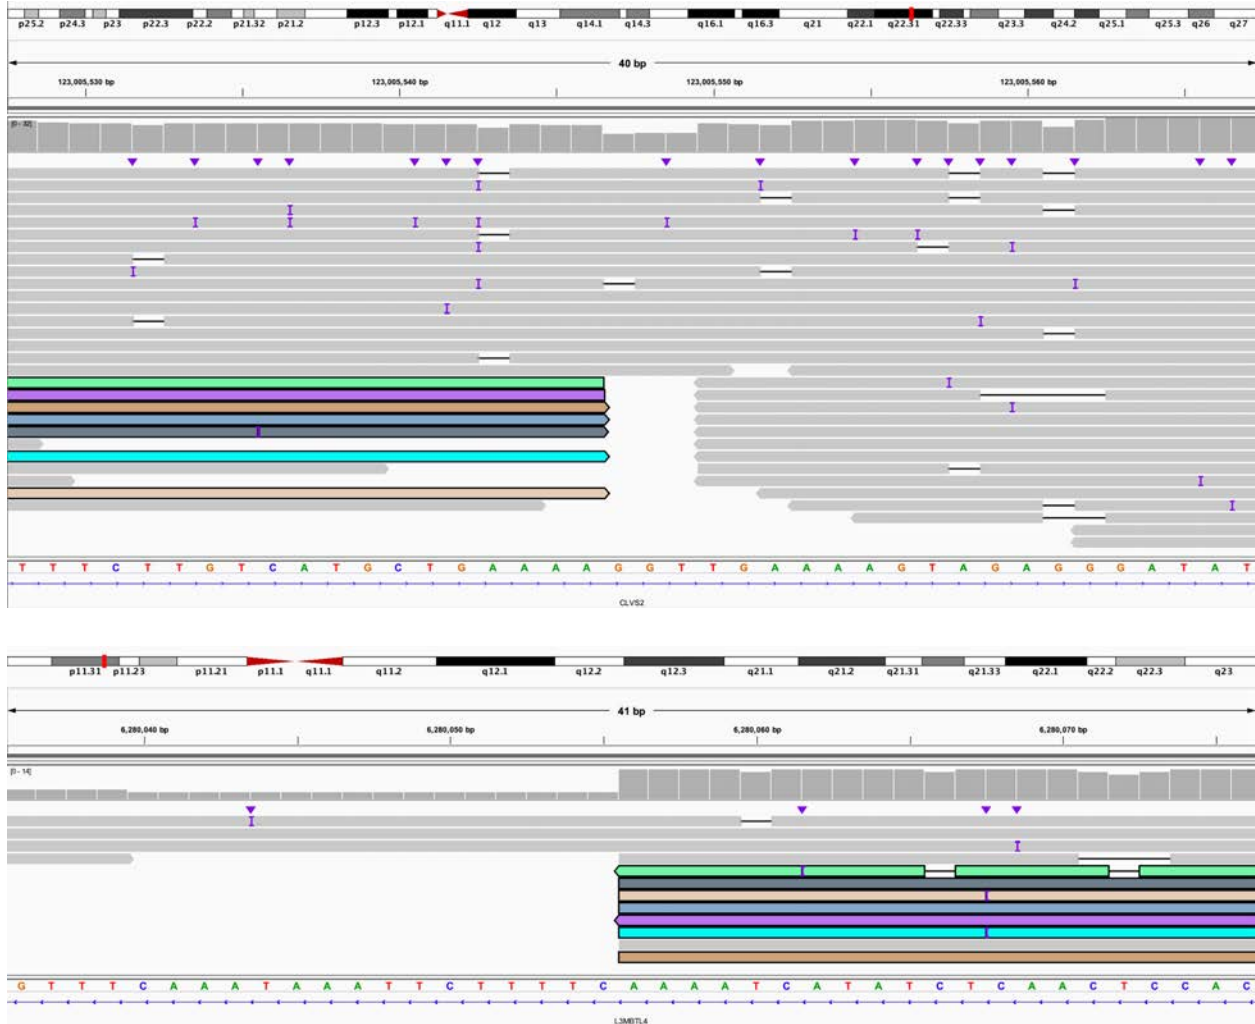

S: 3' end of 6:A bisects *CLVS2* (IGV: chr6:123,005,528-123,005,567) linked to 5' end of 18:C which bisects *L3MBTL4* (IGV: chr18:6,280,036-6,280,076). This is the beginning of derivative chromosome 6.



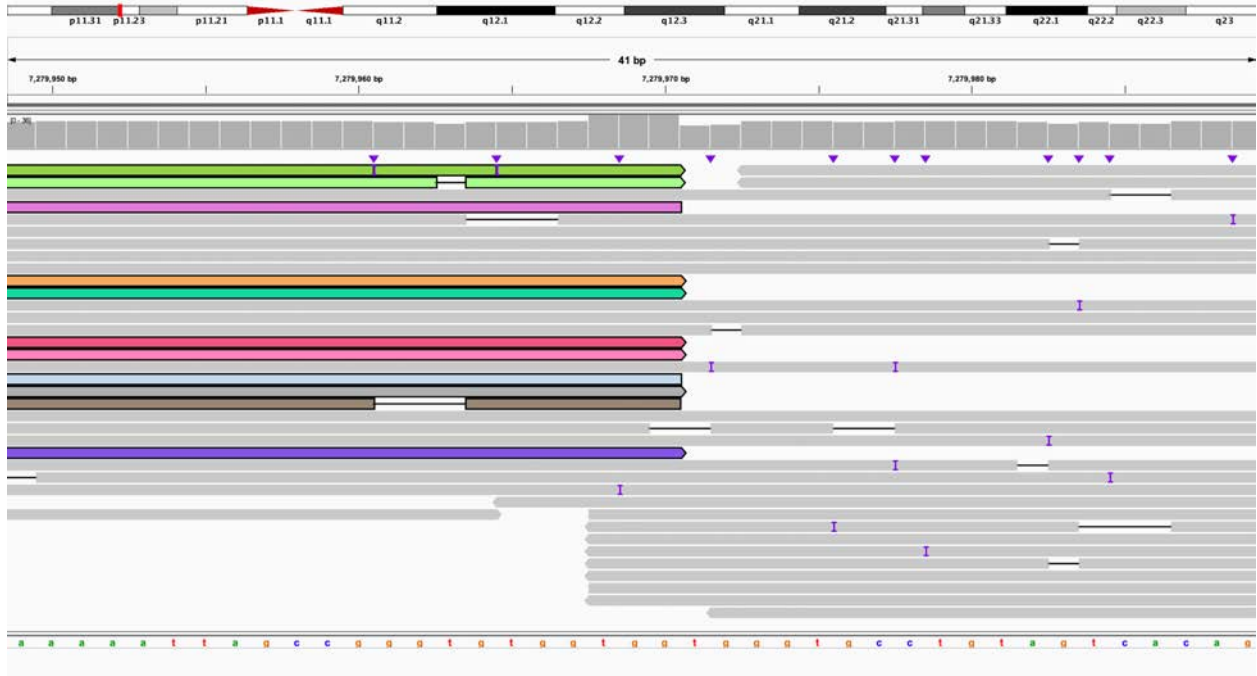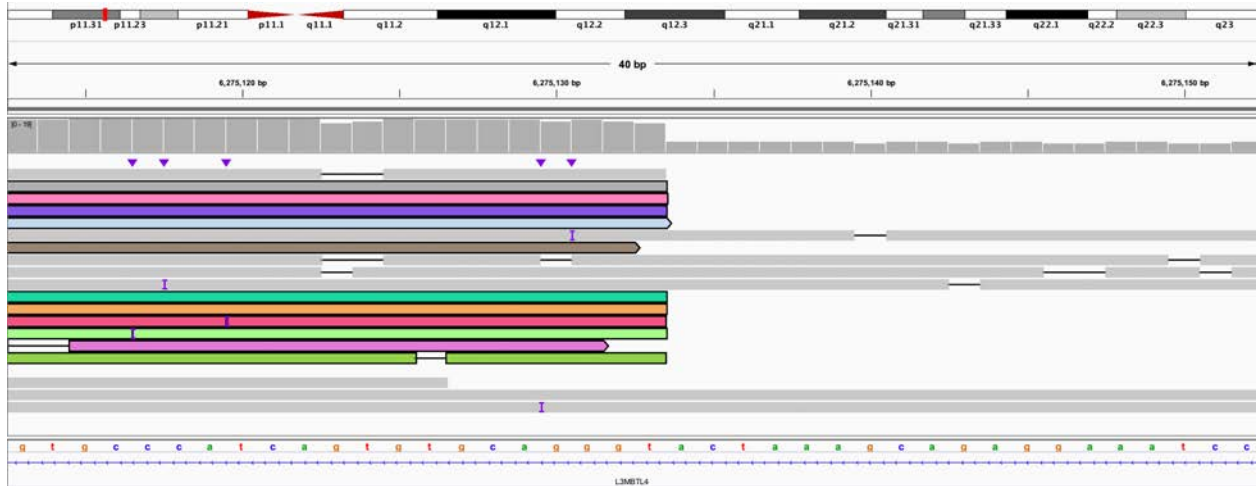

**T:** 3' end of 18:C (IGV: chr18:7,279,949-7,279,989) linked to 3' end of 18:A which bisects *L3MBTL4* (IGV: chr18:6,275,113-6,275,152). This is the end of derivative chromosome 6.

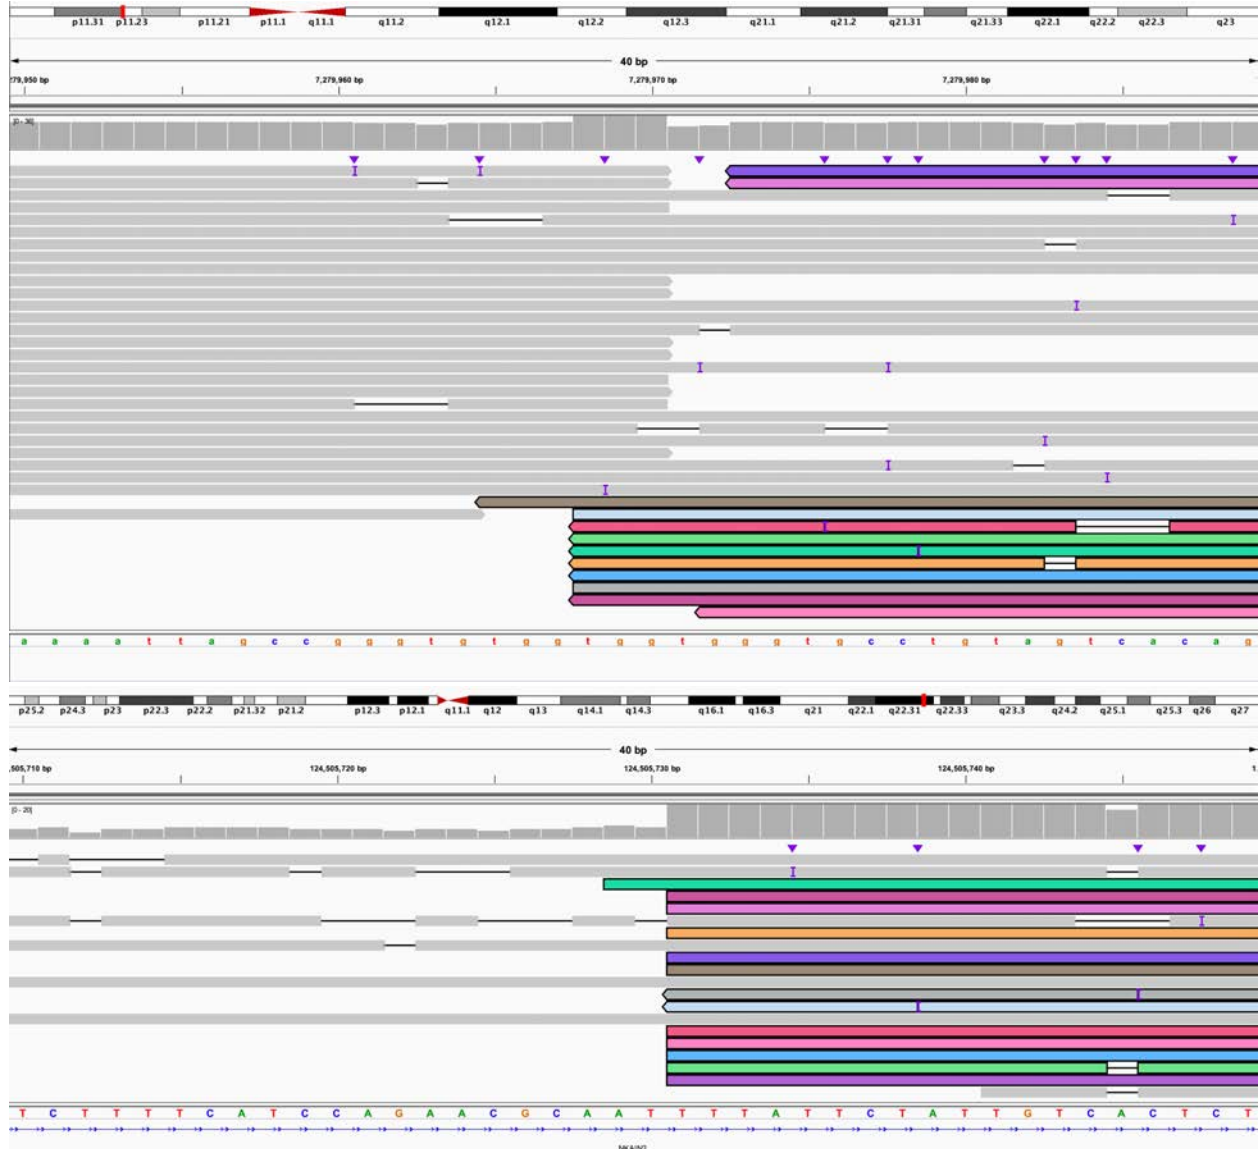

**U:** 5' end of 18:D (IGV: chr18:7,279,950-7,279,989) linked to 5' end of 6:C which bisects *NKAIN2* (IGV: chr6:124,505,710-124,505,749). This is the beginning of derivative chromosome 18.

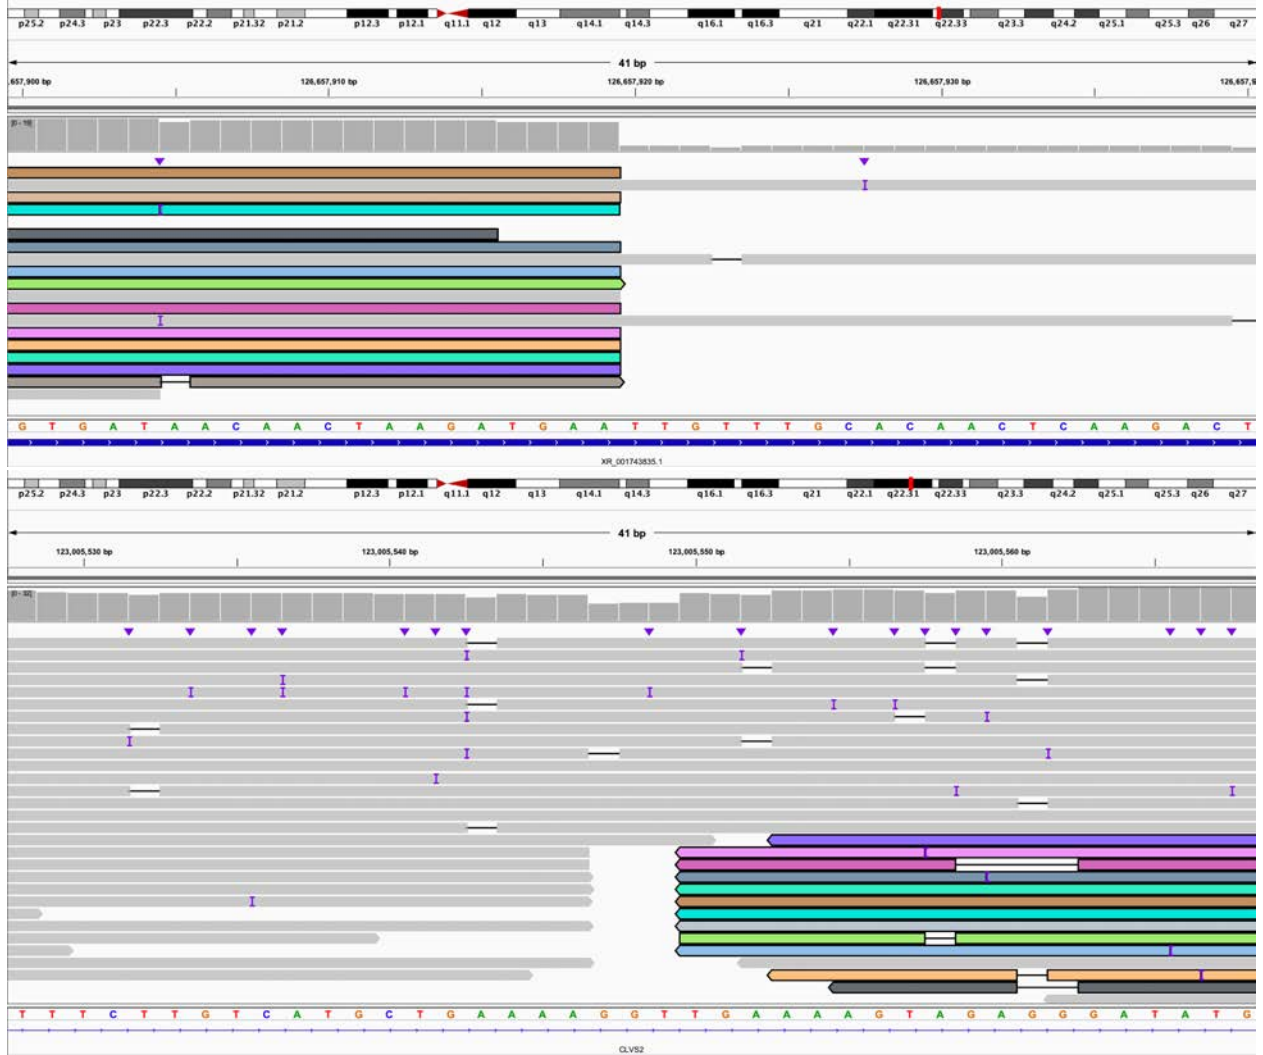

**V:** 3' end of 6:C bisects *XR\_001743835.1* (IGV: chr6:126,657,900-126,657,940) linked to 5' end of 6:B which bisects *CLVS2* (IGV: chr6:123,005,528-123,005,568). This is within derivative chromosome 18.

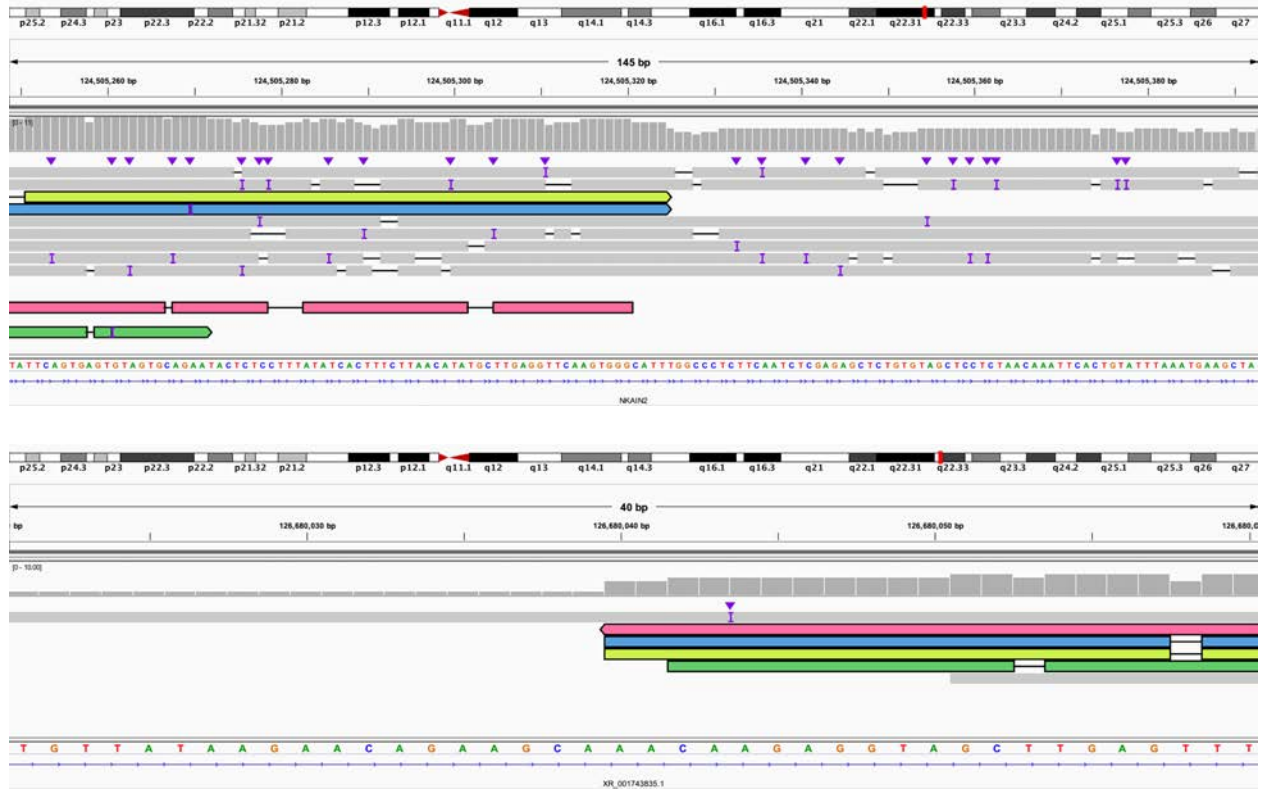

**W:** 3' end of 6:B bisects *NKAIN2* (IGV: chr6:124,505,249-124,505,393) linked to 5' end of 6:E which bisects *XR\_001743835.1* (IGV: chr6:126,680,021-126,680,060). This is the end of derivative chromosome 18.

Figure S30. S082, individual with deletion of *RBM20* and duplication involving *RAI1* and *PMP22*.

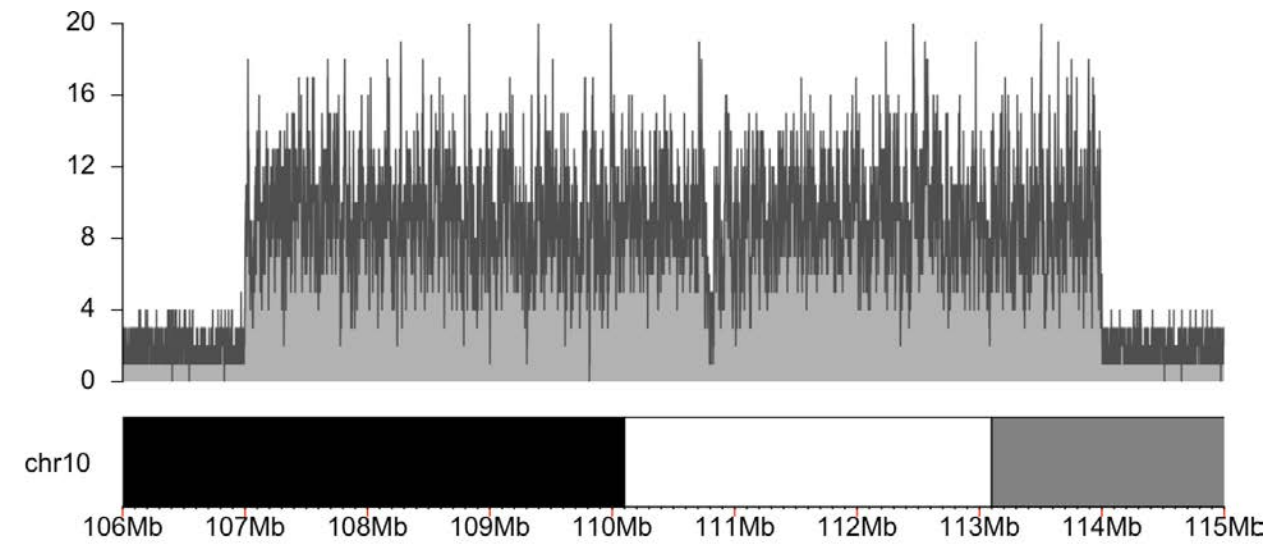

A. Coverage of chromosome 10 target region.

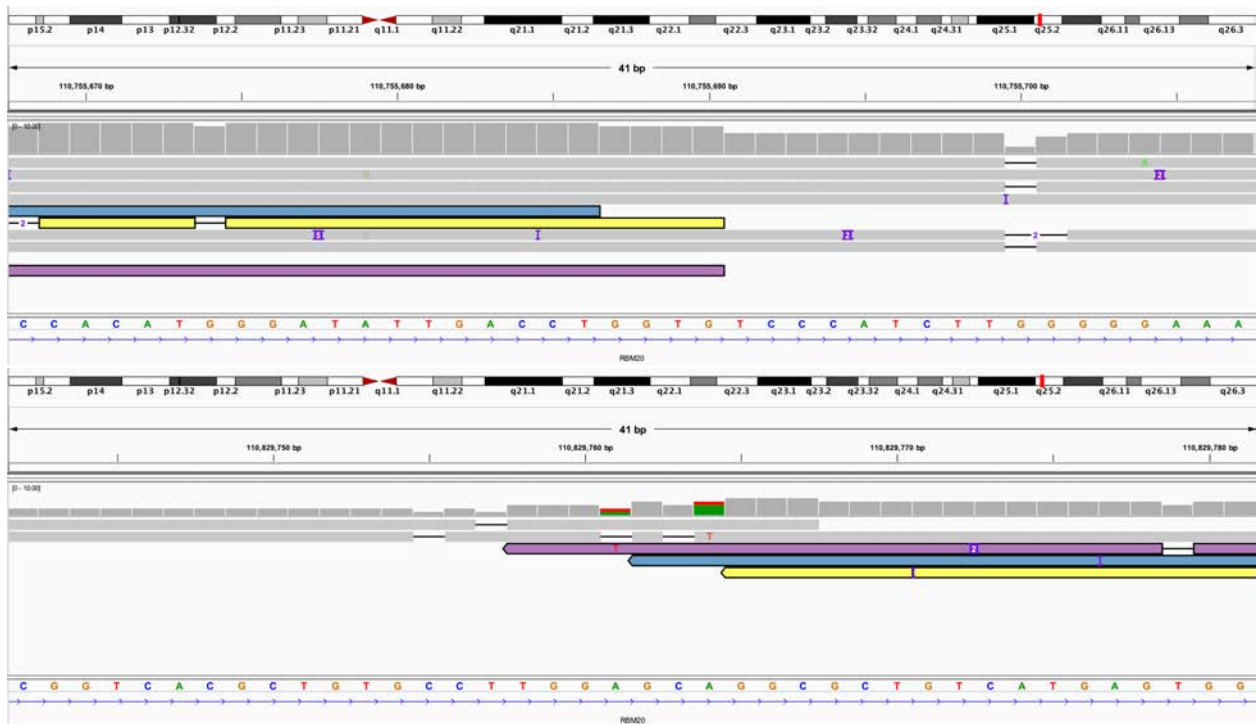

B: 5' end of deletion within *RBM20* (IGV: chr10:110,755,668-110,755,707) is linked to 3' end of deletion (IGV: chr10:110,829,742-110,829,781).

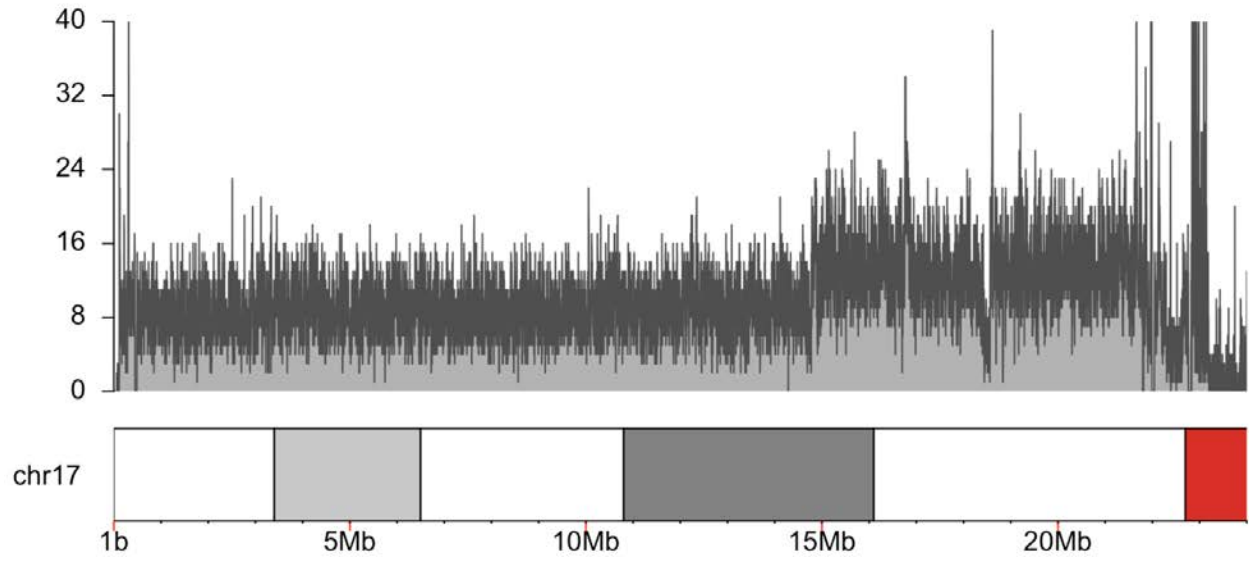

C: Coverage of chromosome 17 target region.

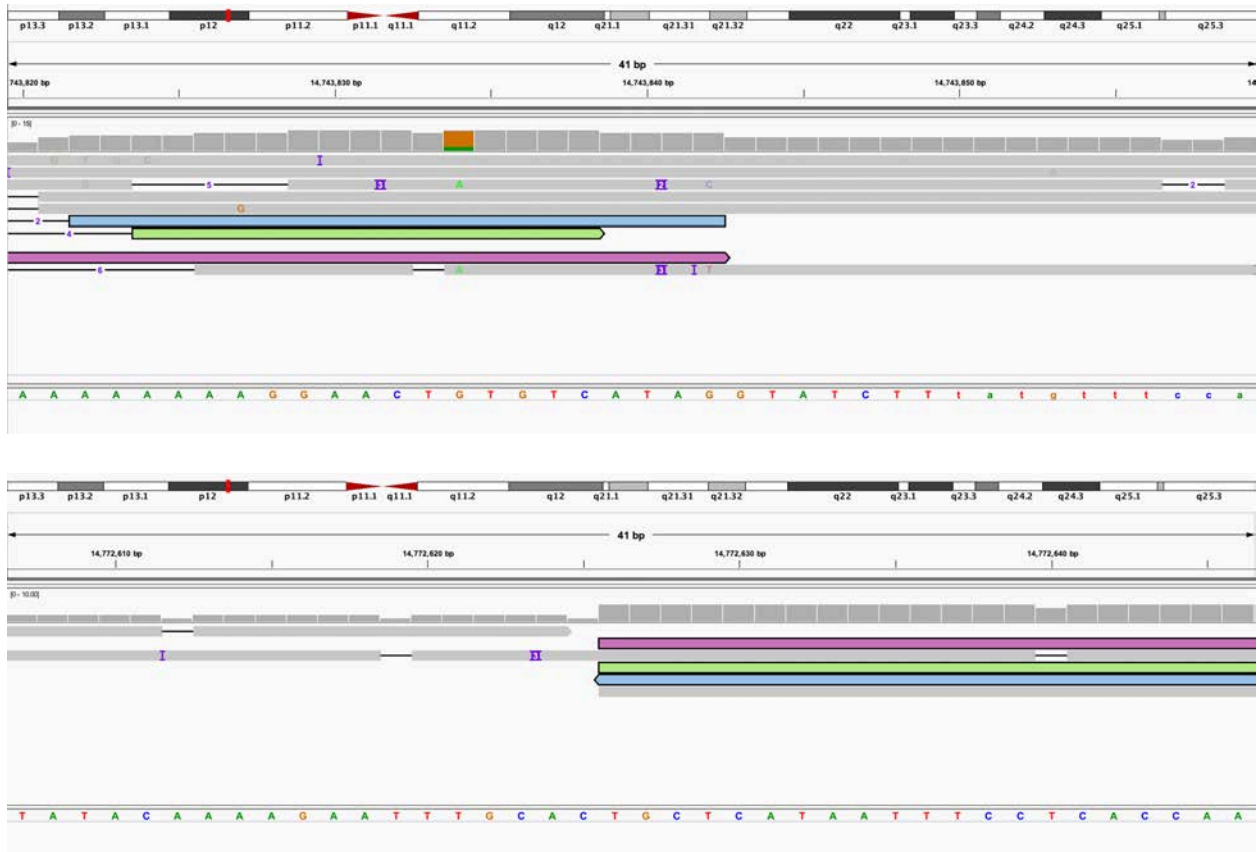

D: 5' end of A (IGV: chr17:14,743,820-14,743,859) is linked to 3' end of C (IGV: chr17:14,772,607-14,772,646) and results in a 29kb deletion.

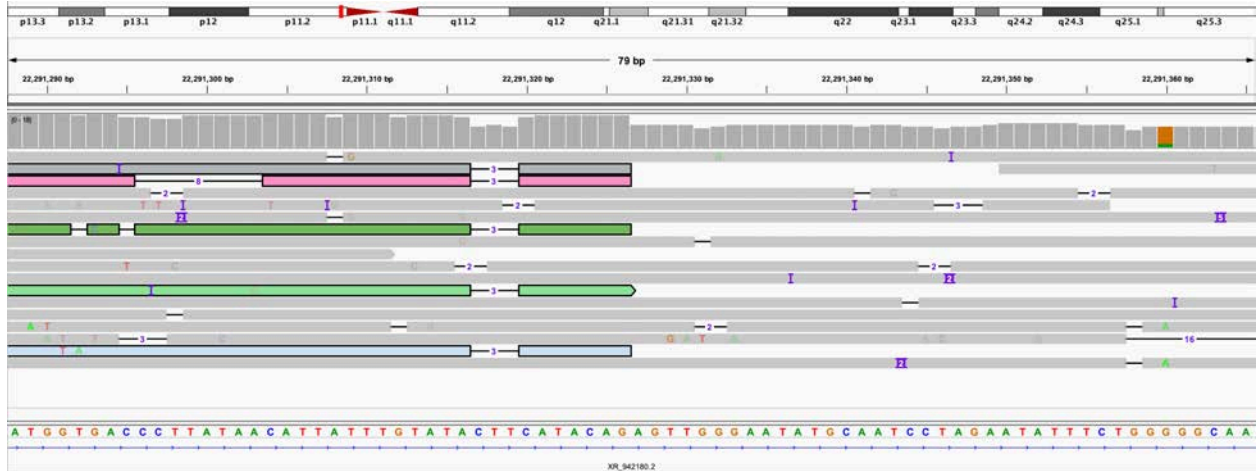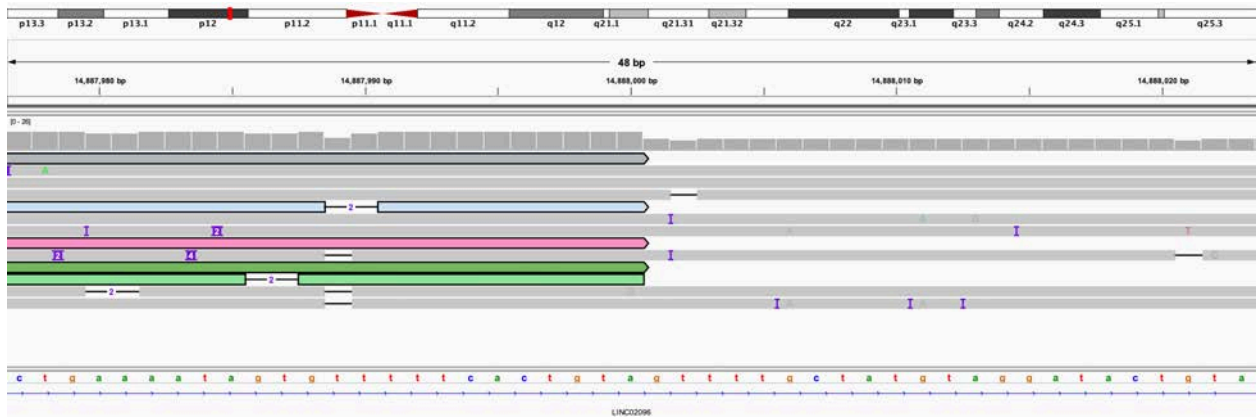

**E:** 5' end of F (IGV: chr17:22,291,288-22,291,365) is connected to the 5' end of D (IGV: chr17:14,887,977-14,888,023).

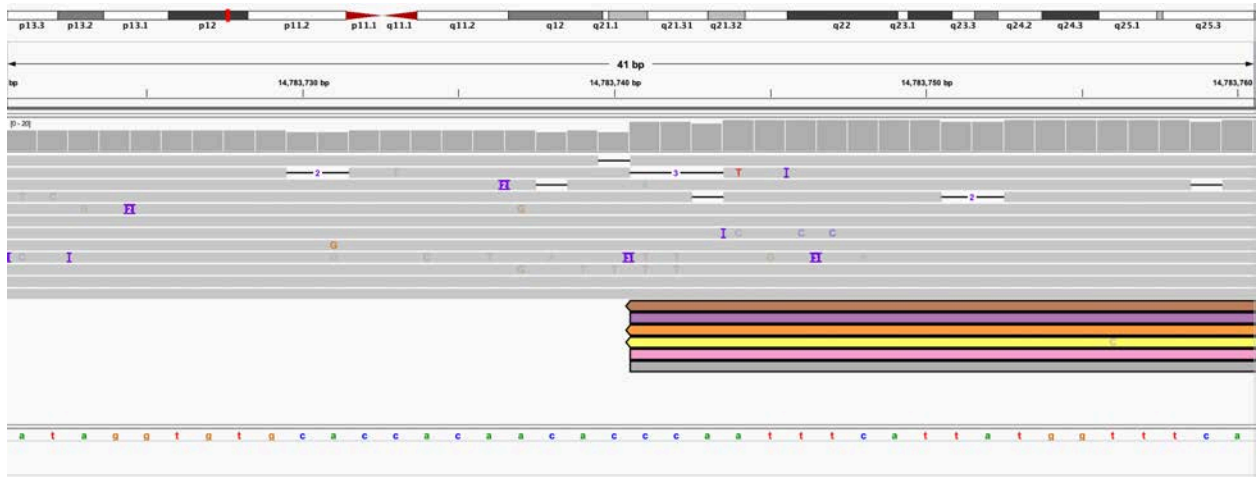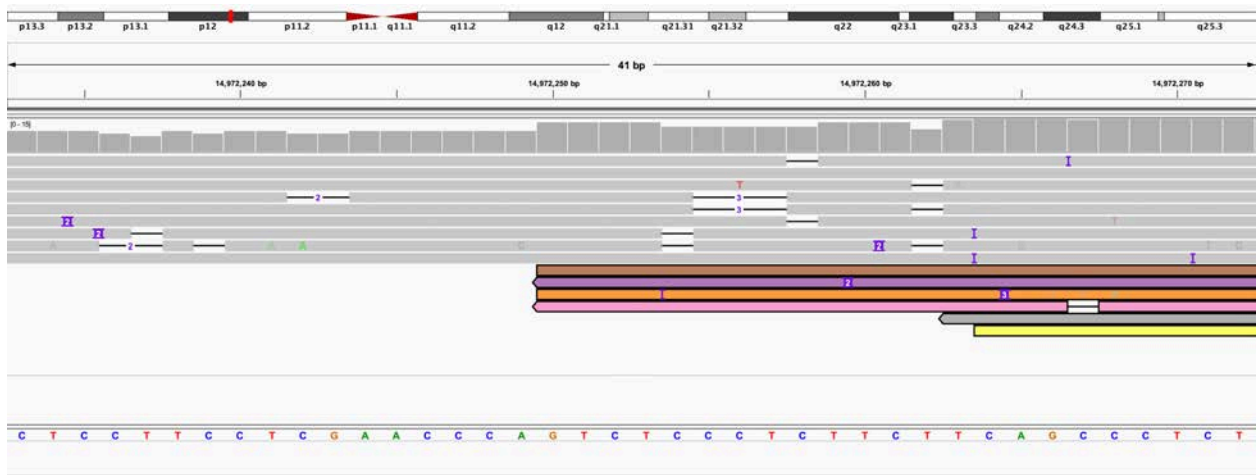

**F:** 3' end of D (IGV: chr17:14,783,721-14,783,760) is connected to the 3' end of F (IGV: chr17:14,972,233-14,972,272).

**Deletion + duplications on chromosome 17**

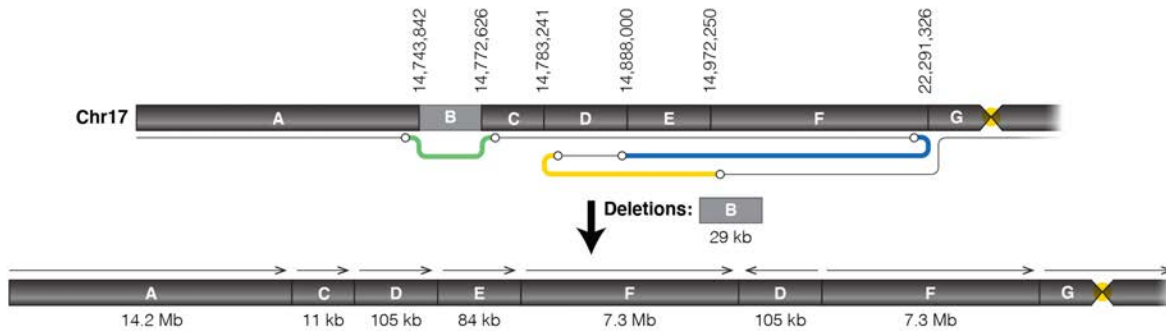

**G:** Cartoon of complex rearrangement on chromosome 17.



Figure S31. S083, individual with terminal deletion and proximal duplication of chromosome 4.

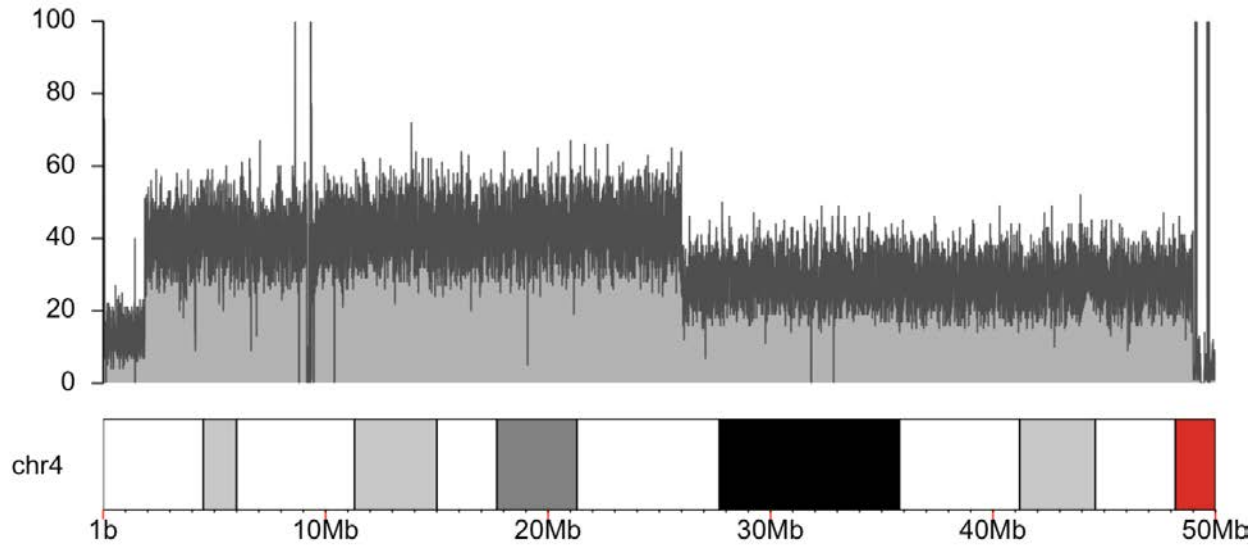

A. Coverage of target region showing terminal deletion followed by proximal duplication.

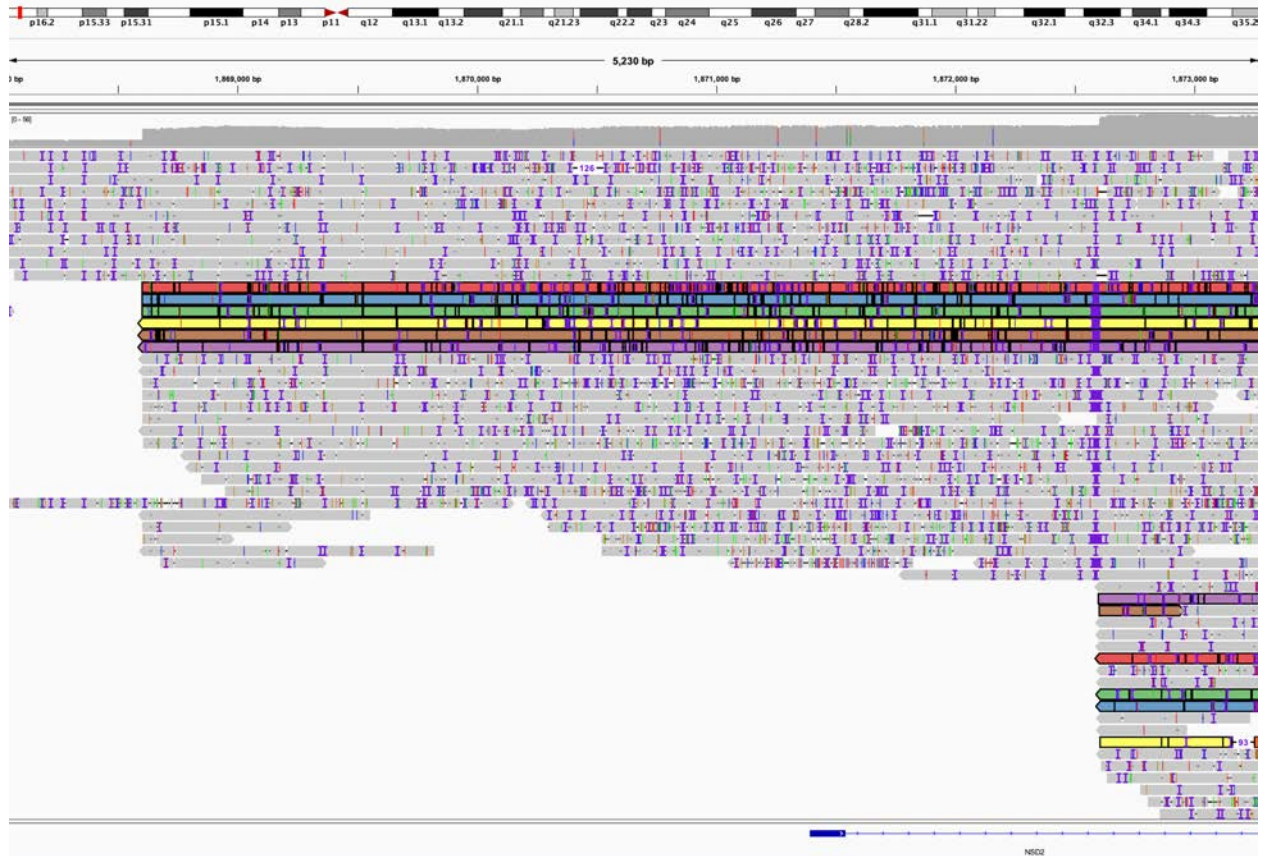

B. IGV view of deletion and duplication breakpoints. A small number of reads are highlighted to show the relationship between the duplicated region and the deletion. IGV view is of chr4:1,867,951-1,873,179.

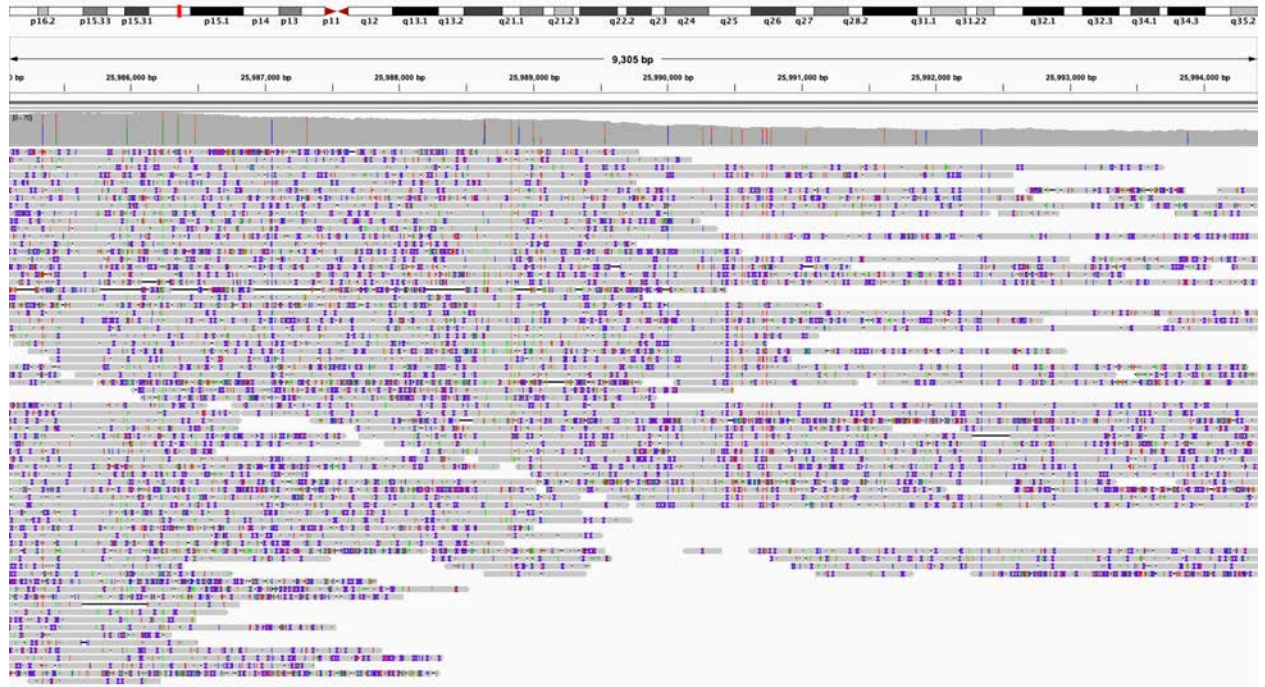

C. IGV view of the end of the duplication breakpoint. There is no clear termination of the duplication, suggesting a terminal event. IGV view is of chr4:25,985,086-25,994,389.

Figure S32. S002 (*ALMS1*), IGV views of known inherited stop variant and *Alu* insertion.

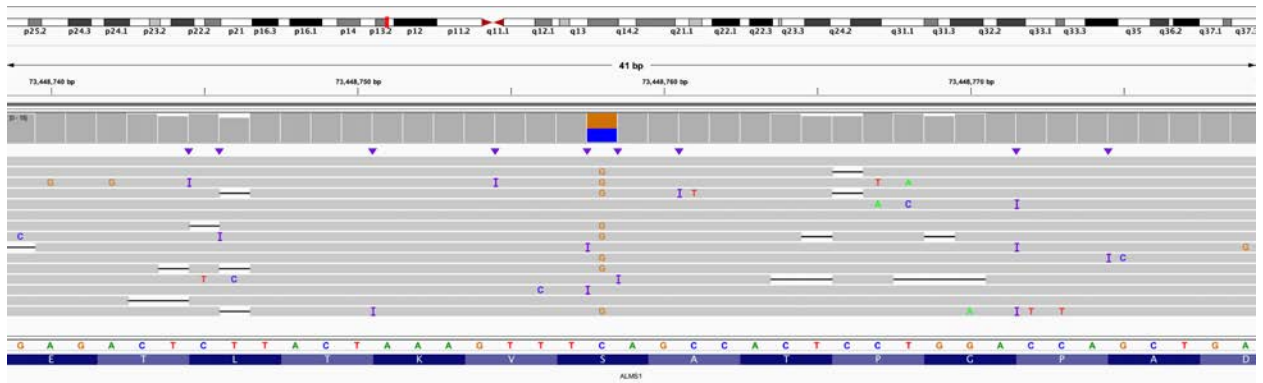

A. IGV view of all reads showing the known paternally inherited C>G that results in a stop codon. IGV coordinates for the screenshot are chr2:73,448,739-73,448,779.

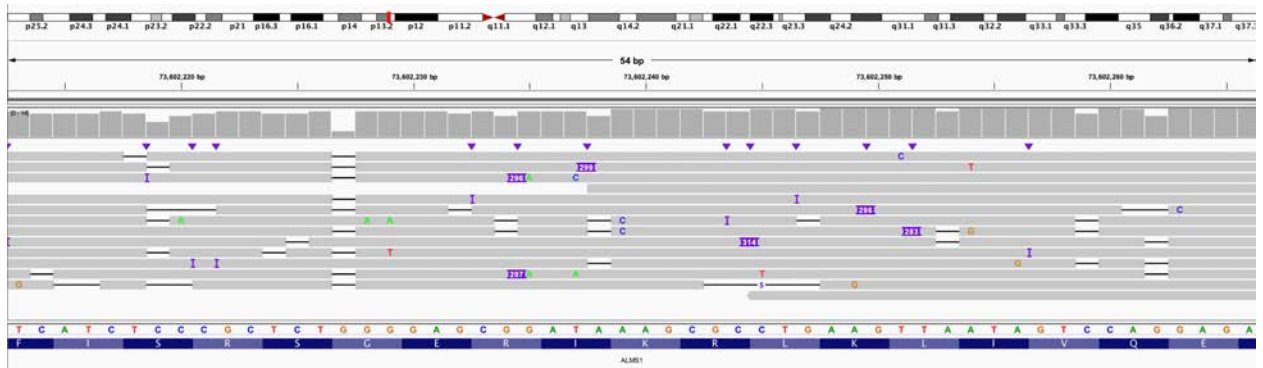

B. Screenshot of ~300 bp insertion in exon 20 that represents an *Alu* insertion, all reads are shown. IGV view is chr2:73,602,213-73,602,266.

Figure S33. S003 (*NPHP4*), IGV views of inherited stop, splice variant, and data showing variant does affect splicing.

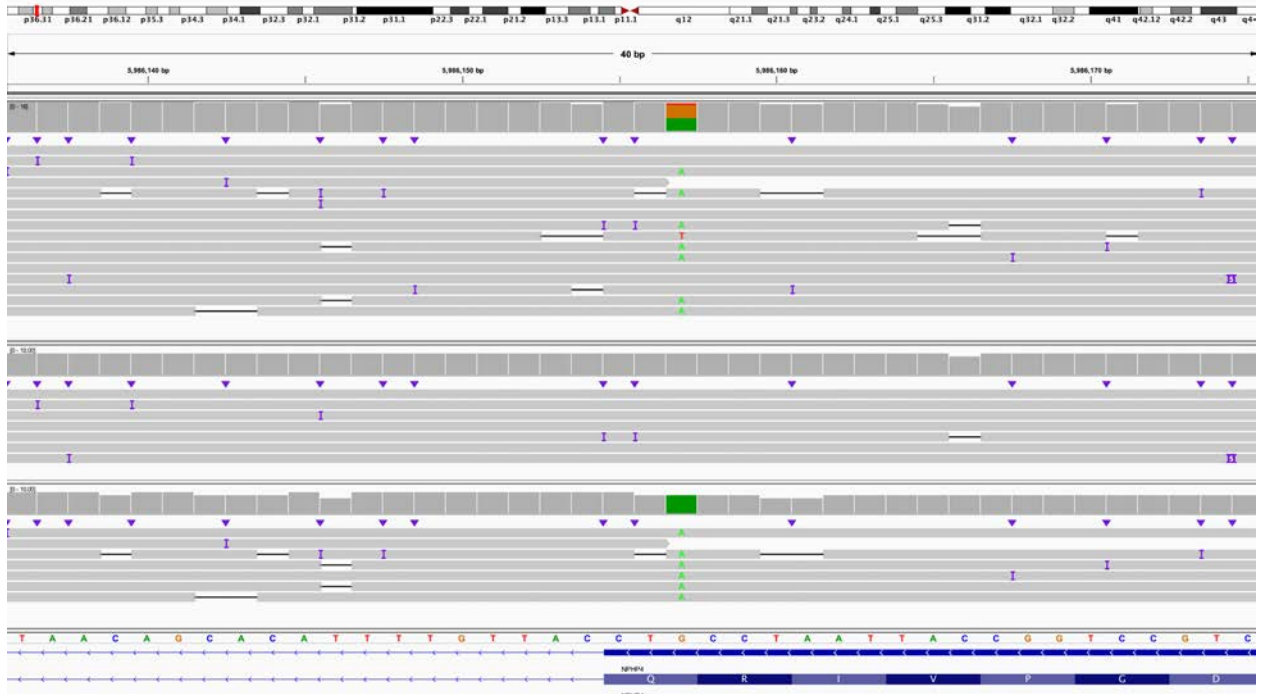

A. IGV view of all reads (top track) and reads phased into two haplotypes (middle and bottom tracks). DNA sequence and gene body are located below. The known paternally inherited G>A is located in the bottom haplotype. IGV screenshot is from chr1:5,986,136-5,986,175.

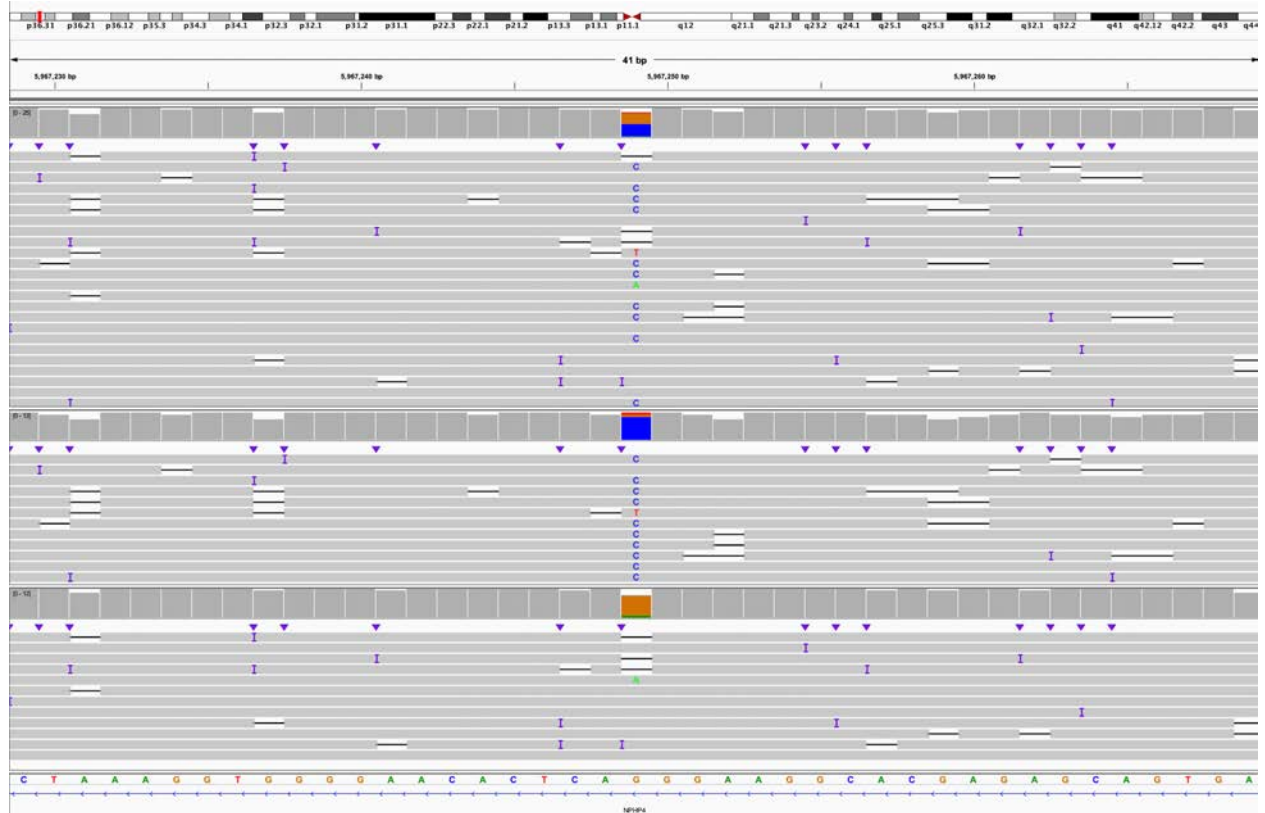

**B.** IGV view with reads as in A showing the G>C predicted to create a novel splice donor site on a different haplotype than the known paternally inherited G>A in A. IGV screenshot is from chr1:5,967,229-5,967,269.

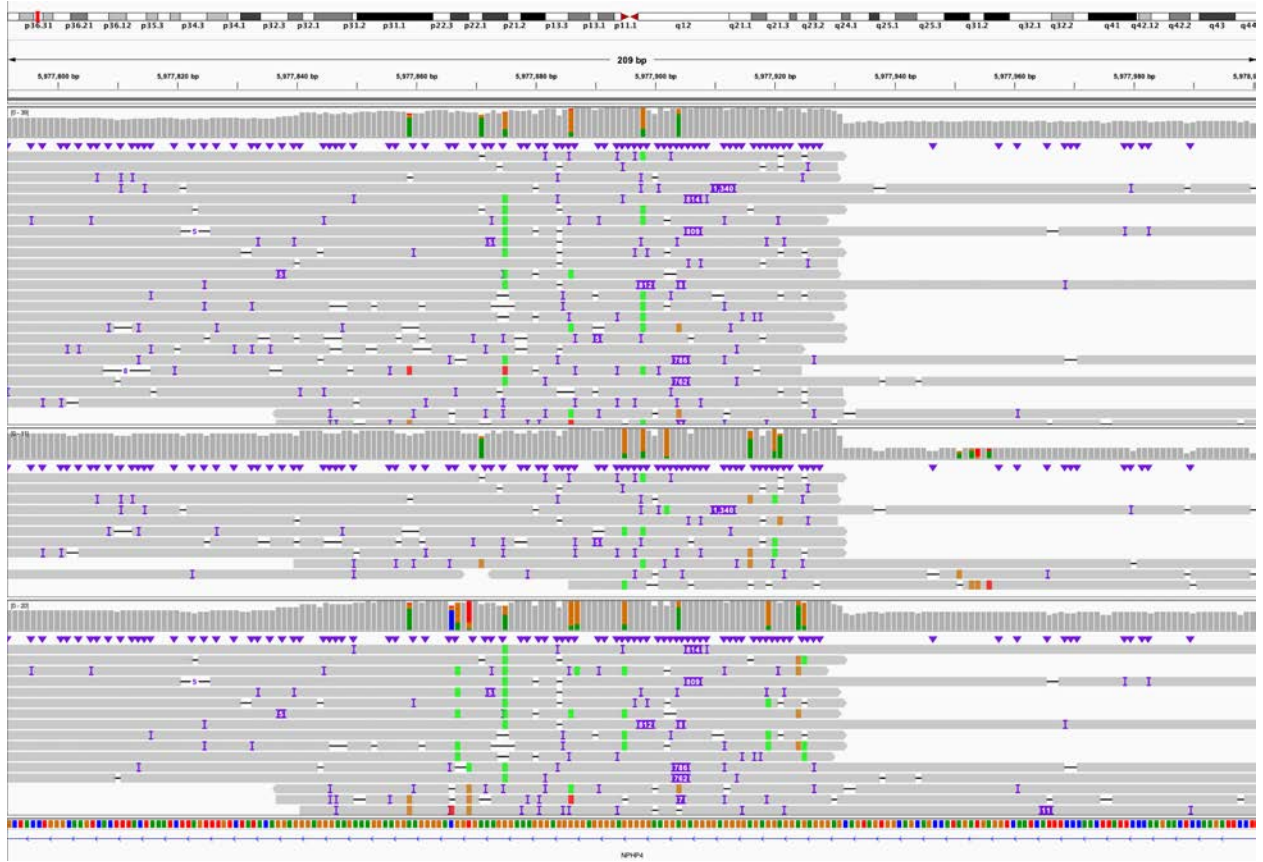

C. Analysis of SVs using both SVIM and Sniffles identified two insertions within an AG-rich repeat in an intron of *NPHP4* at approximately chr1:5,977,890. Phasing of reads separated all reads into a haplotype containing the ~800 bp insert and another containing the ~1,340 bp insert, similar to sizes observed in both nonhuman primates and human samples<sup>4</sup>. IGV screenshot is from chr1:5,977,792-5,978,001.

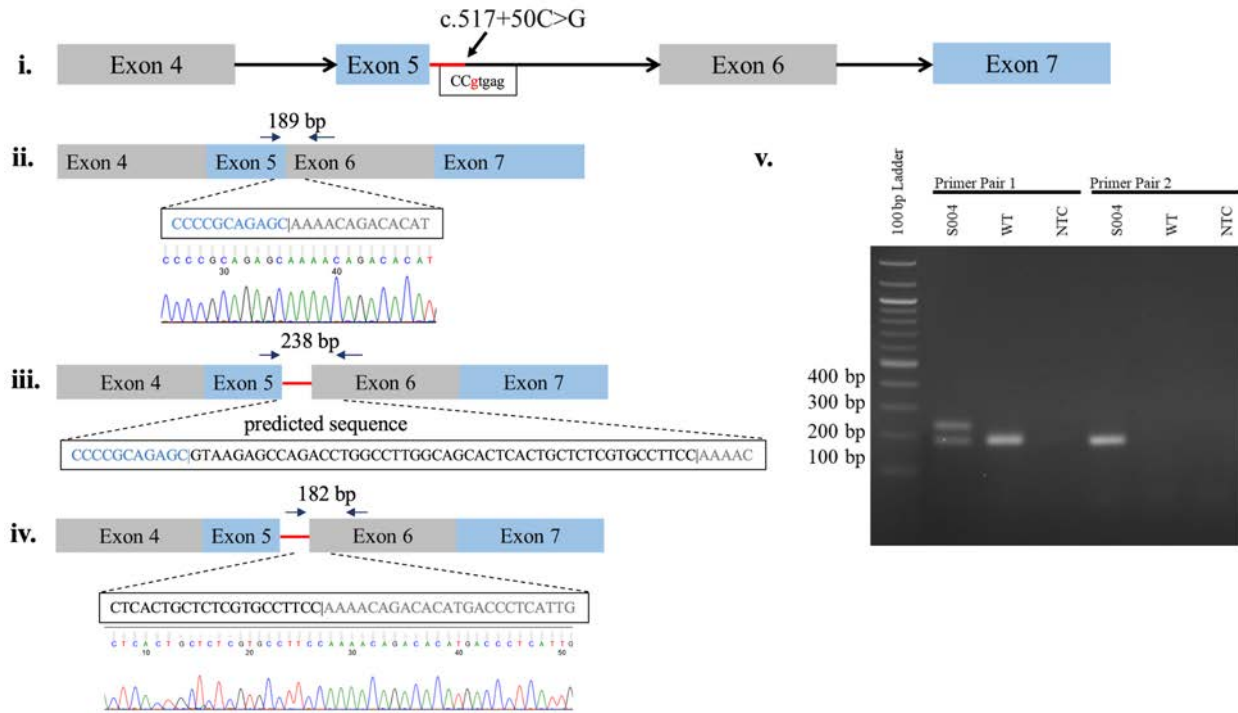

**D.** Splicing defect caused by deep intronic *NPHP4* variant in individual S004. **i.** *NPHP4* exon structure around the c.517+50C>G variant predicted to generate a new splice donor site (gtgag). **ii.** Normal splice isoform indicating primer pair 1 spanning the Exon 5-6 junction and corresponding Sanger sequencing of the PCR product. **iii.** Predicted aberrant transcript with inclusion of 49 intronic base pairs indicating predicted PCR product size for primer pair 1. **iv.** Predicted aberrant transcript indicating predicted PCR product size for primer pair 2, which should only amplify the aberrant transcript and corresponding Sanger sequencing of the PCR product. **v.** PCR products from S004 and unaffected fibroblast cDNA. Bands match the sizes predicted in B-D. *NPHP4* reference sequence: NM\_015102.4. bp=base pairs; NTC=No Template Control PCR; WT=wild-type, unaffected fibroblast cDNA.

Figure S34. S004 (*VARS2*), IGV view of known inherited variant.

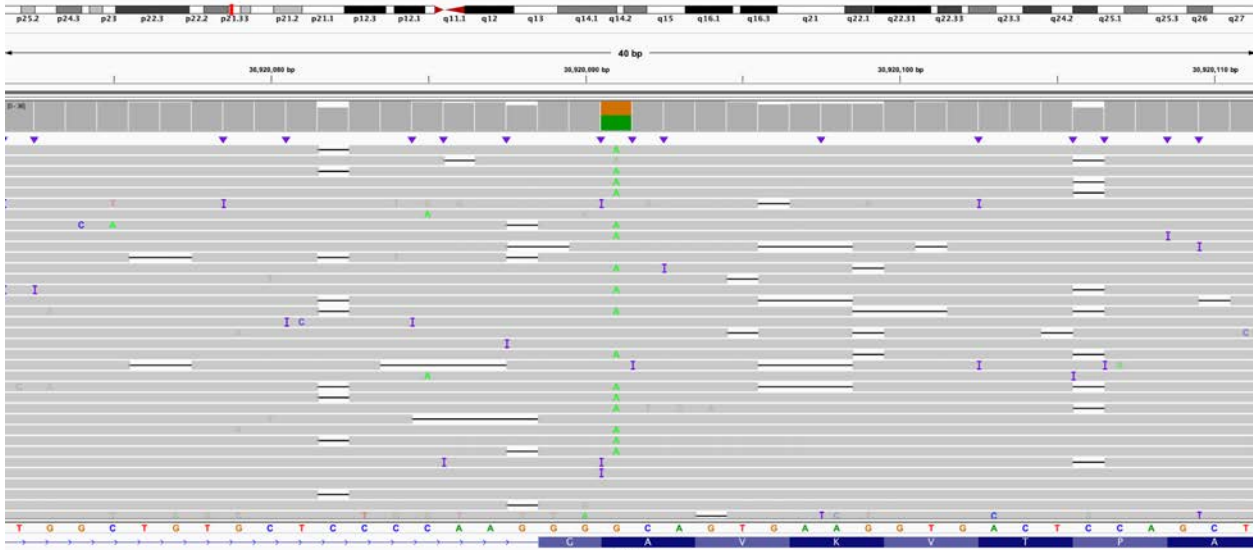

A. IGV view of known pathogenic paternally inherited G>A. No second variant was found in this case. IGV view is of chr6:30,920,072-30,920,111.

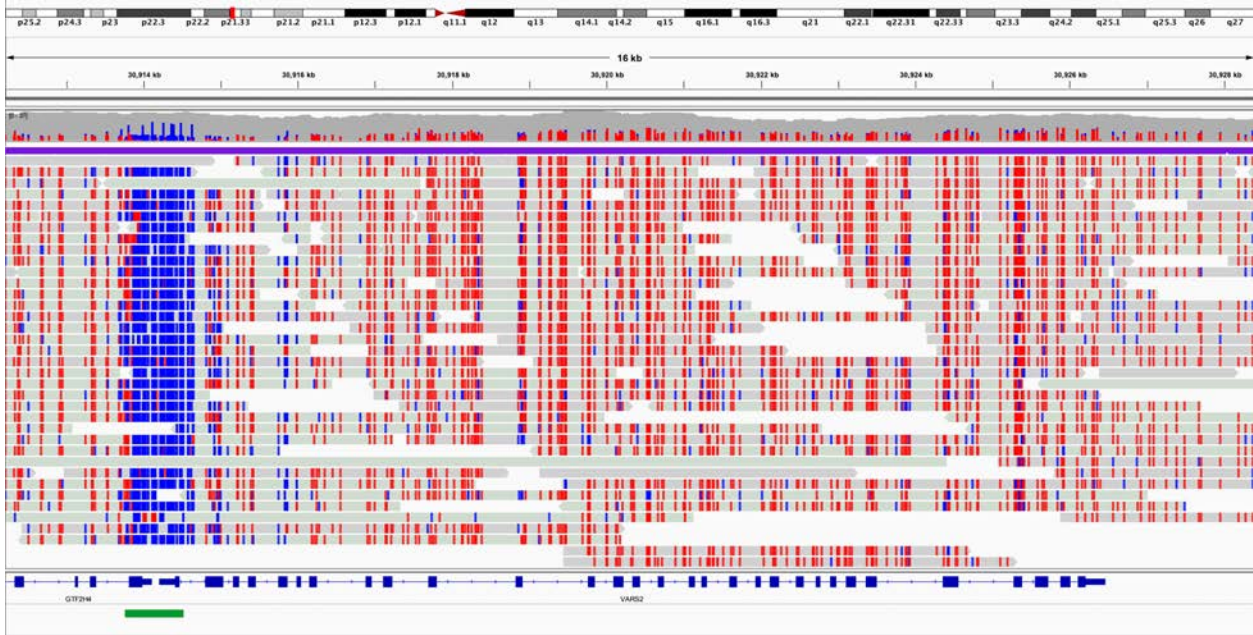

B. Analysis of reads reveals no change in methylation at the 5' UTR of *VARS2*. In this view, blue represents a hypomethylated region, suggesting an open 5' region and promoter. The green box under the promoter indicates the position of the CpG island. IGV view is chr6:30,912,208-30,928,459.



Figure S35. S008 (*HPRT1*), view of inversion and FISH results.

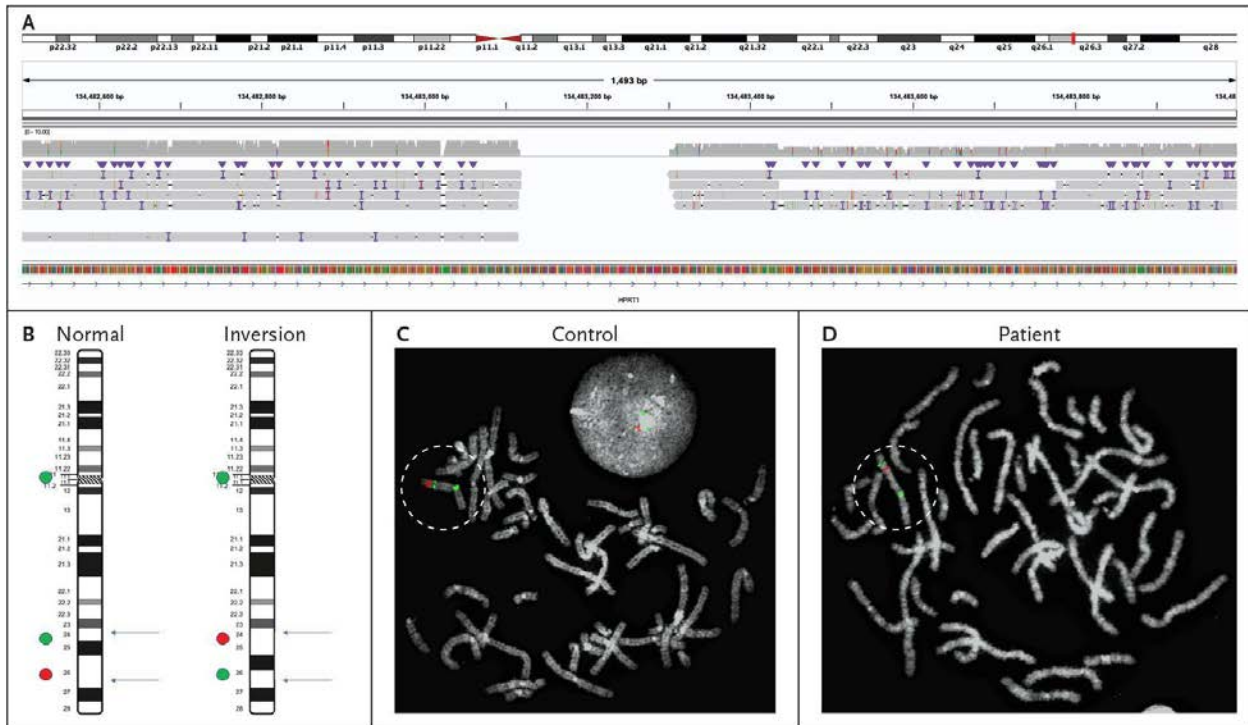

**A.** T-LRS suggested an approximately 17 Mbp inversion bisected *HPRT1*. Reads on the left partially mapped to approximately chrX:117,359,013 and reads on the right partially mapped to chrX:117,488,245. IGV view is chrX:134,482,505-134,484,004. **B.** FISH probes were designed to confirm the presence of an inversion. **C.** Image from control case, dashed circle highlights X chromosome. **D.** Image from the individual confirmed the presence of a 17 Mbp inversion reported as inversion (X)(q24q26.3), dashed circle highlights the X chromosome.

Figure S36. S009 (*DMD*), IGV view of AGAA expansion and frequency in SSC samples.

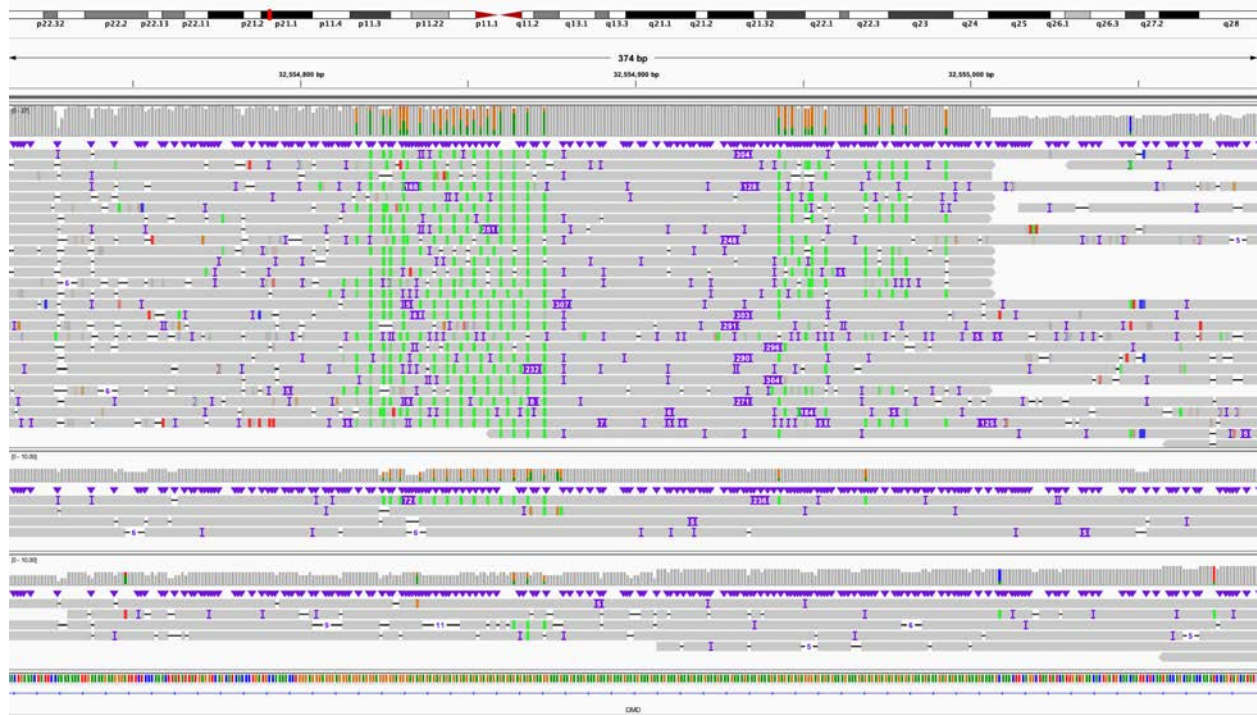

A. Expansion of an AGAA repeat represents a variant of uncertain significance in a child with a clinical diagnosis of Duchenne muscular dystrophy, but no molecular diagnosis. This view shows the insertion in intron 16 of the gene that is homozygous in the proband (top panel) and heterozygous in the bottom panel (the insert is divided into a 72 bp insert and a 236 bp insert). Bottom panel is from the proband's unaffected full brother who does not have an insertion at this position. IGV view is of chrX:32,554,713-32,555,087.

### DMD intronic repeat genotypes in SSC (n=8,857 genomes)

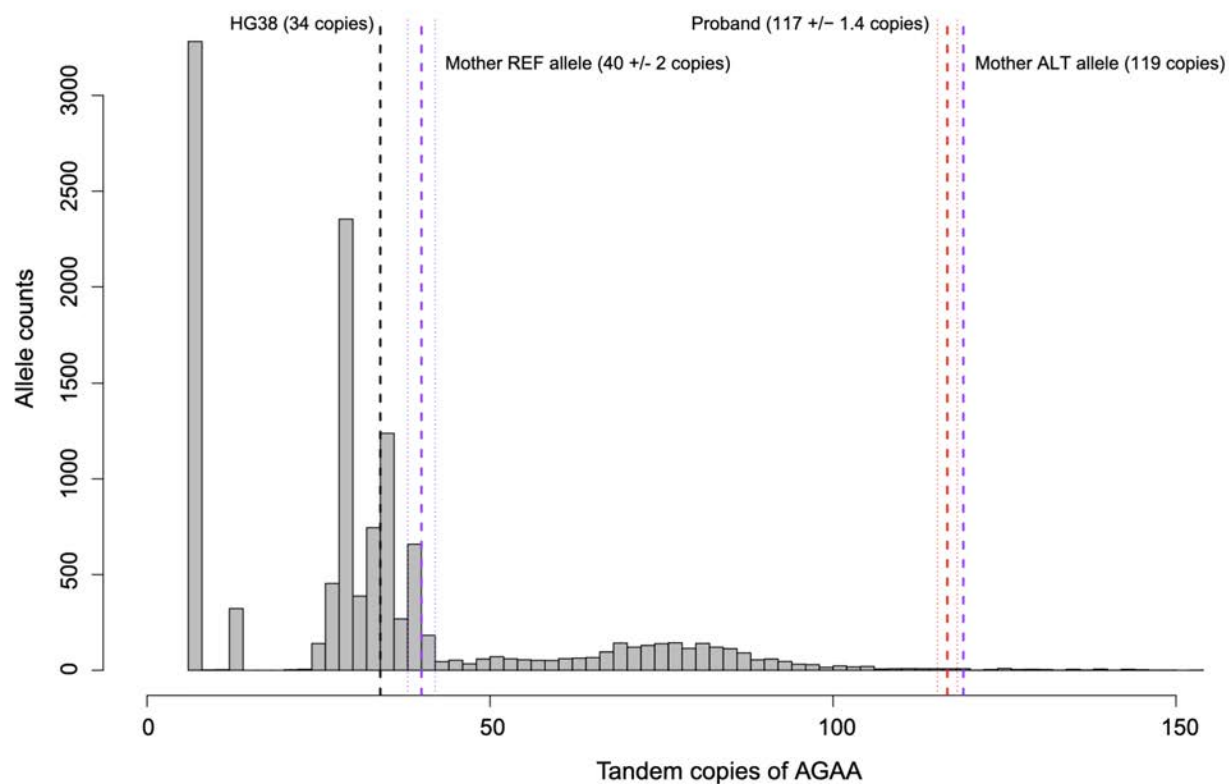

**B.** Histogram showing the number of individuals predicted to have an expansion of the AGAA repeat at the same position as the proband within the SSC collection. Position of the repeat expansion in the proband is shown in red, the length of the two haplotypes from the proband's mother is shown in red.

Figure S37. S013 (*HPS1*), IGV view of inherited variant and deletion identified by LRS.

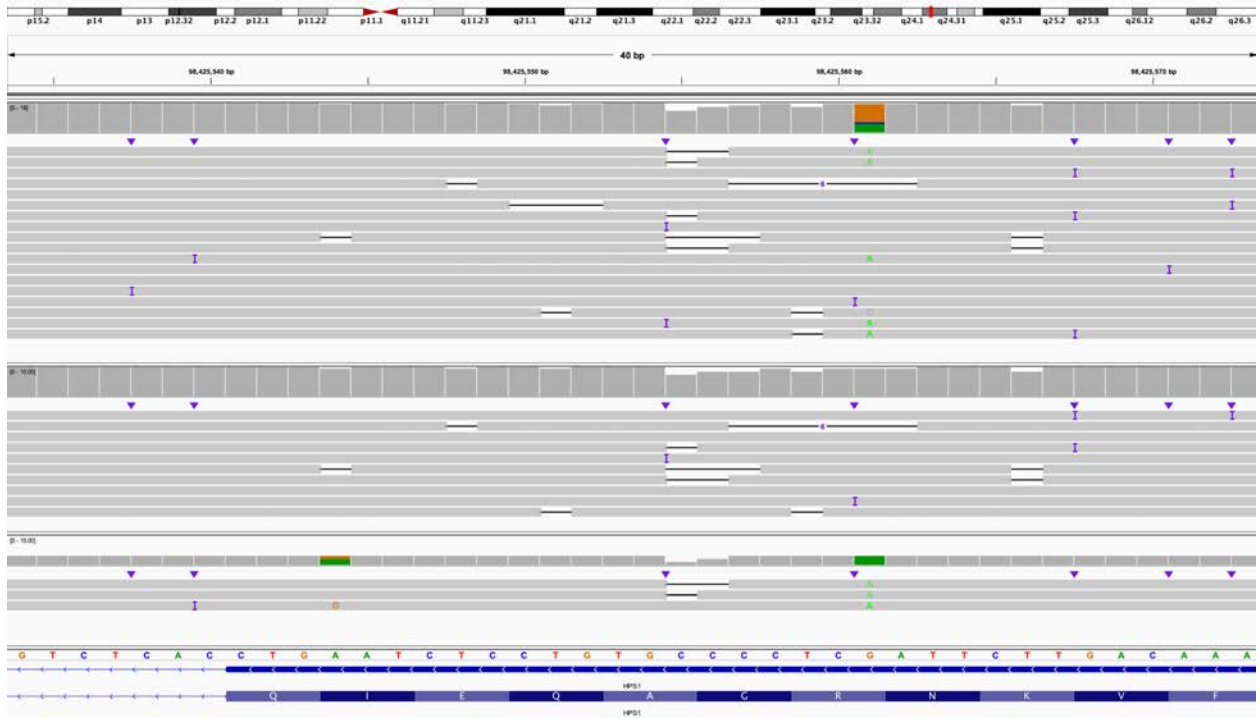

A. Screenshot of known paternally inherited pathogenic G>A variant. IGV view is of chr10:98,425,534-98,425,573. All reads are shown in the top track, haplotype 1 is the middle, and haplotype 2 is the bottom. Haplotype 2 is assumed to be the paternal track as the known paternally inherited G>A is in that track.

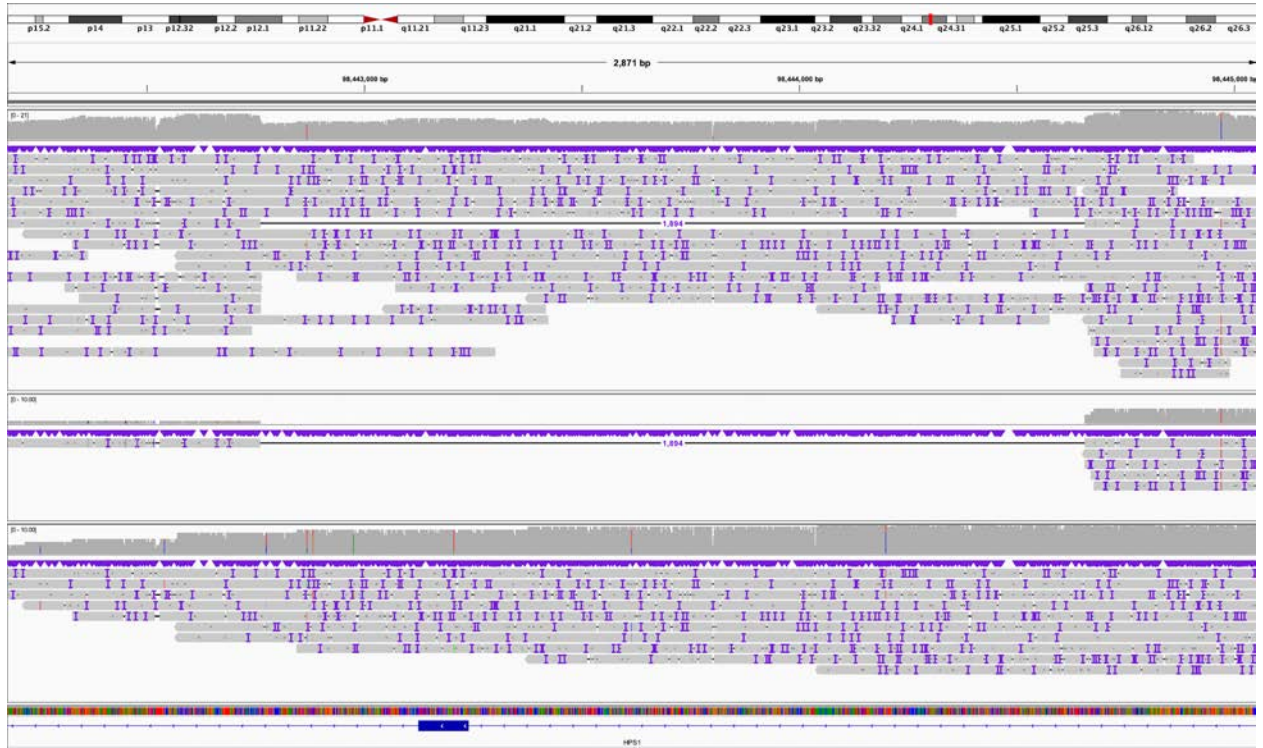

**B.** SV calling identified an approximately 1,900 bp deletion that included all of exon 3 on a different haplotype than the known G>A. Tracks are the same as in A. Screenshot from chr10:98,442,300-98,445,184.

Figure S38. S018 (*PAH*), known inherited splice variant identified, no second variant found.

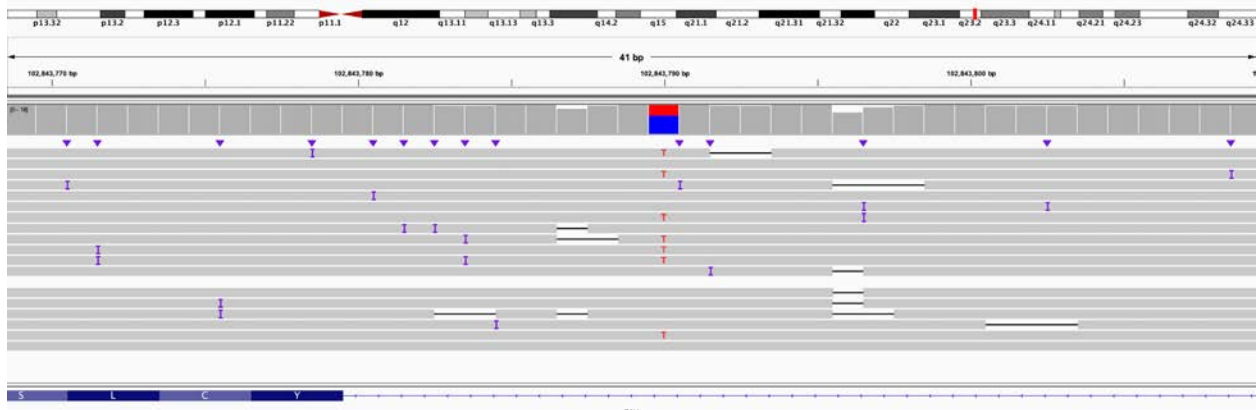

A. IGV view of previously known inherited pathogenic C>T splice variant. No second variant was found in this case. IGV view is of chr12:102,843,769-102,843,809.

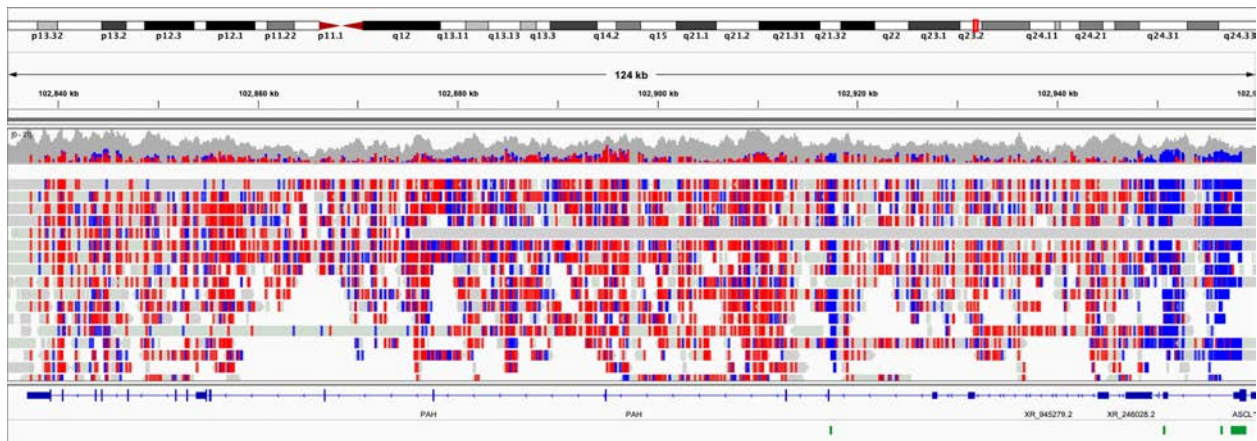

B. Bisulfite view of the entire *PAH* gene showing no hypermethylation near the 5' end of the gene (blue). Green blocks at the bottom of the image represent CpG islands. In this view, blue represents a CpG that is not methylated while red represents a methylated CpG.

Figure S39. S025 (*ABCA4*), the previously known variant and a 1,500 bp insertion can be phased into different haplotypes.

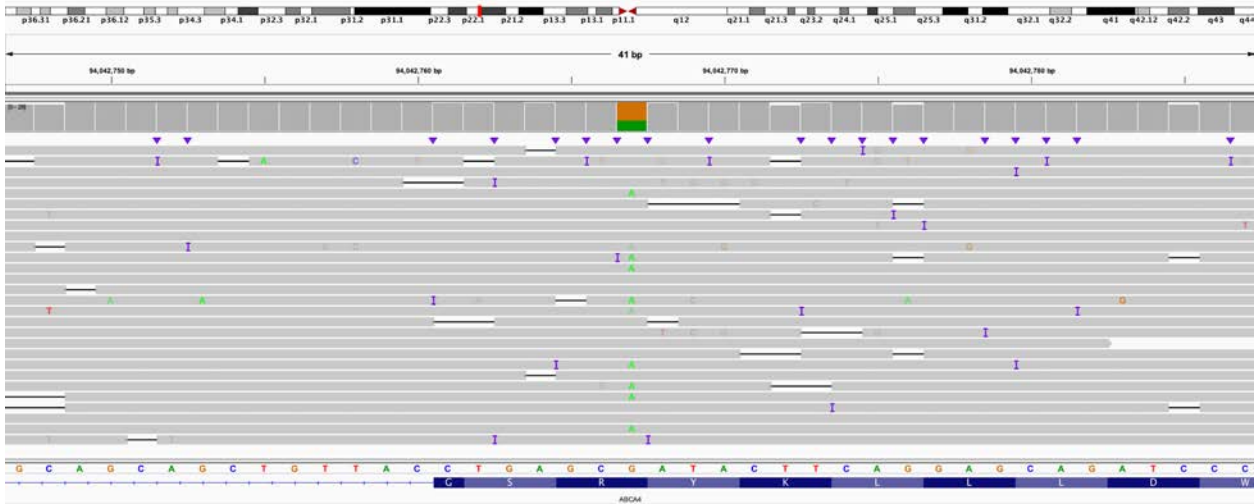

A. IGV screenshot of long reads showing the previously identified inherited pathogenic variant. IGV view is of chr1:94,042,747-94,042,787.

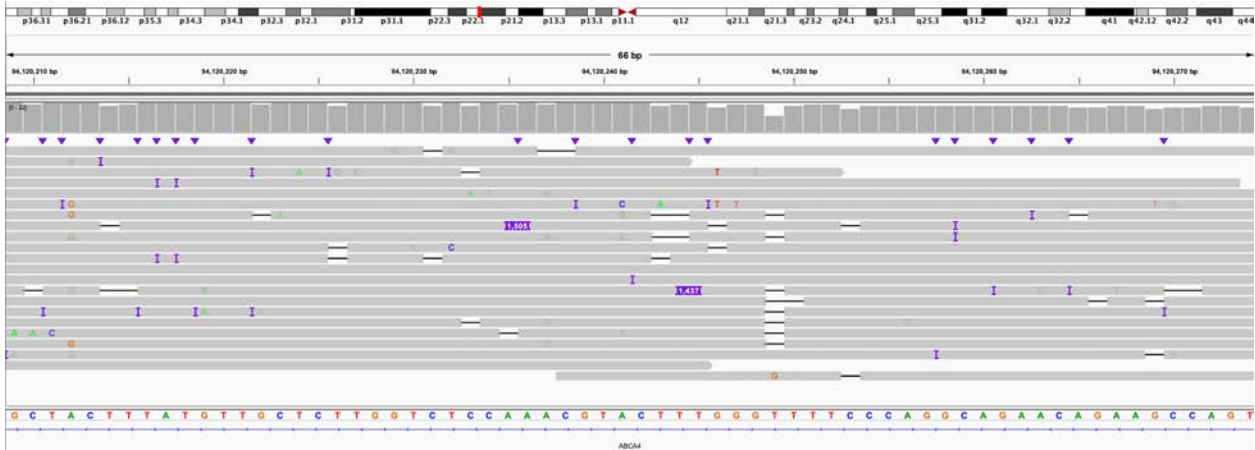

B. IGV screenshot of long reads showing two reads that include the 1,500 bp insertion in intron 1 of *ABCA4*. Several reads on either side of the region include the insertion and are soft clipped. IGV view is of chr1:94,120,209-94,120,274.

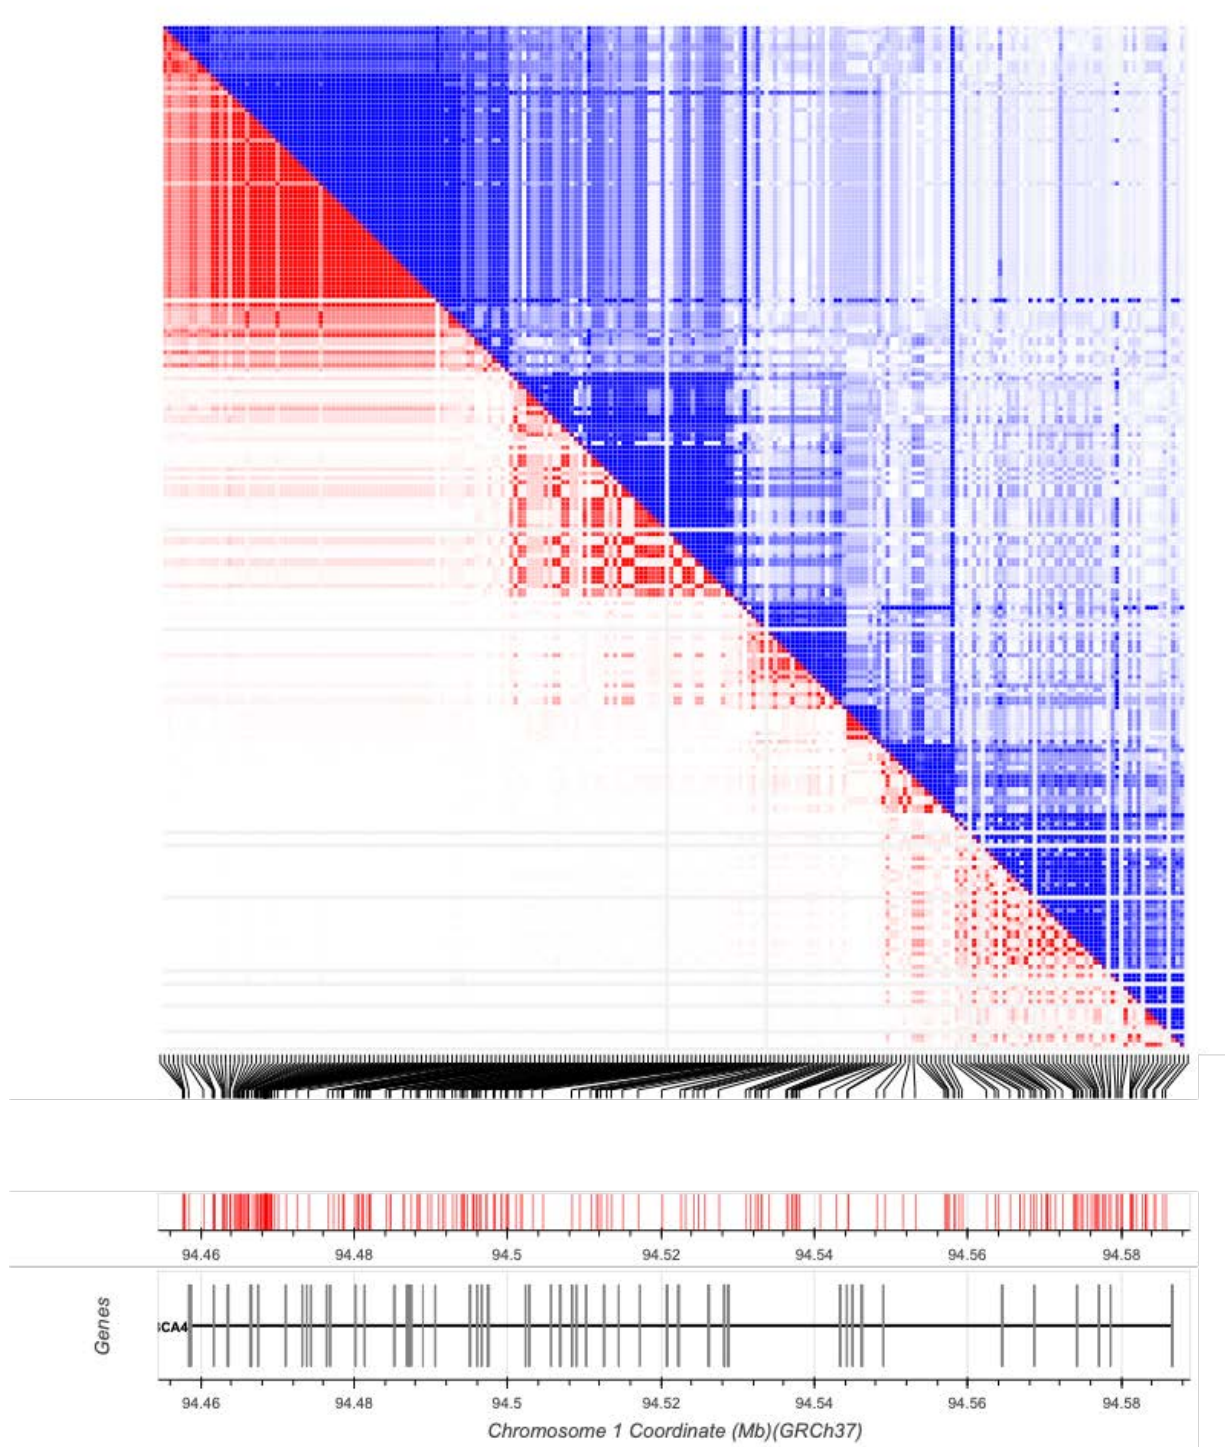

C. The linkage disequilibrium matrix represents  $R^2$  and  $D'$  values in the lower and upper diagonal of the heatmap, respectively. Higher intensity colors represent higher linkage disequilibrium. Using orthogonal Illumina WGS data from S025, we identified all SNVs overlapping *ABCA4* using GATK, followed by calculating all pairwise  $R^2$  and  $D'$  values using the 1000 Genomes Project Phase III genotypes.



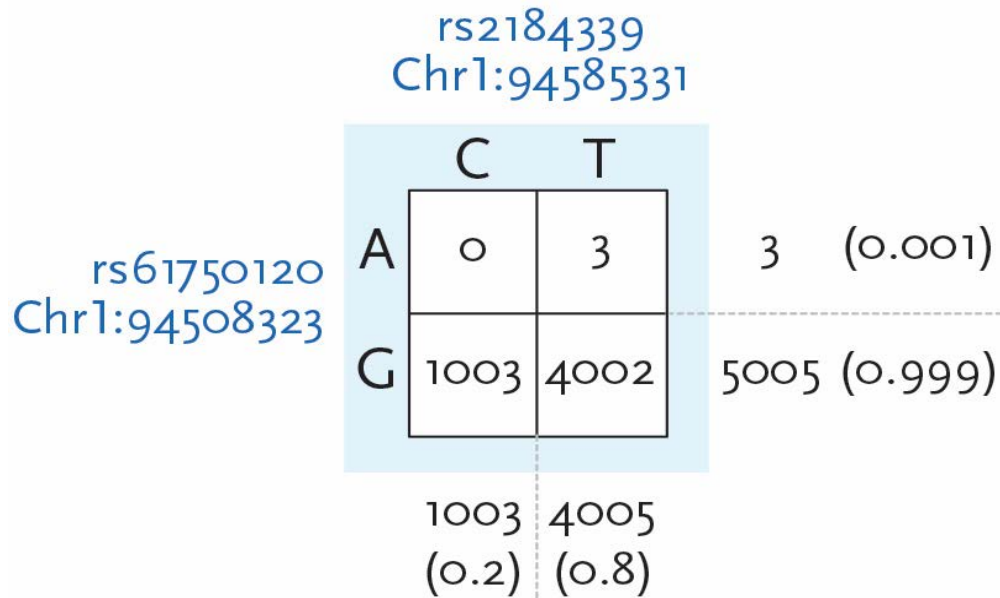

### Haplotypes

|      |      |         |
|------|------|---------|
| G_T: | 4002 | (0.799) |
| G_C: | 1003 | (0.2)   |
| A_T: | 3    | (0.001) |
| A_C: | 0    | (0.0)   |

### Statistics

|                |        |
|----------------|--------|
| D'             | 1.0    |
| R <sup>2</sup> | 0.0002 |
| Chi-sq         | 0.7518 |
| p-value        | 0.3859 |

rs61750120 and rs2184339 are in  
linkage equilibrium

**D.** Phasing detail. The missense mutation on exon 22 corresponds to rs61750120 (G>A), while rs2184339 (T>C) has its alternative allele on the same allele as the 1.5 kbp insertion. Using the 1000 Genomes Project variation data (Machiela and Chanock 2015), we confirmed that the A allele of rs61750120 and the C allele of rs2184339 were never observed on the same haplotype ( $D'=1$  and  $R^2=0.0001$ ).

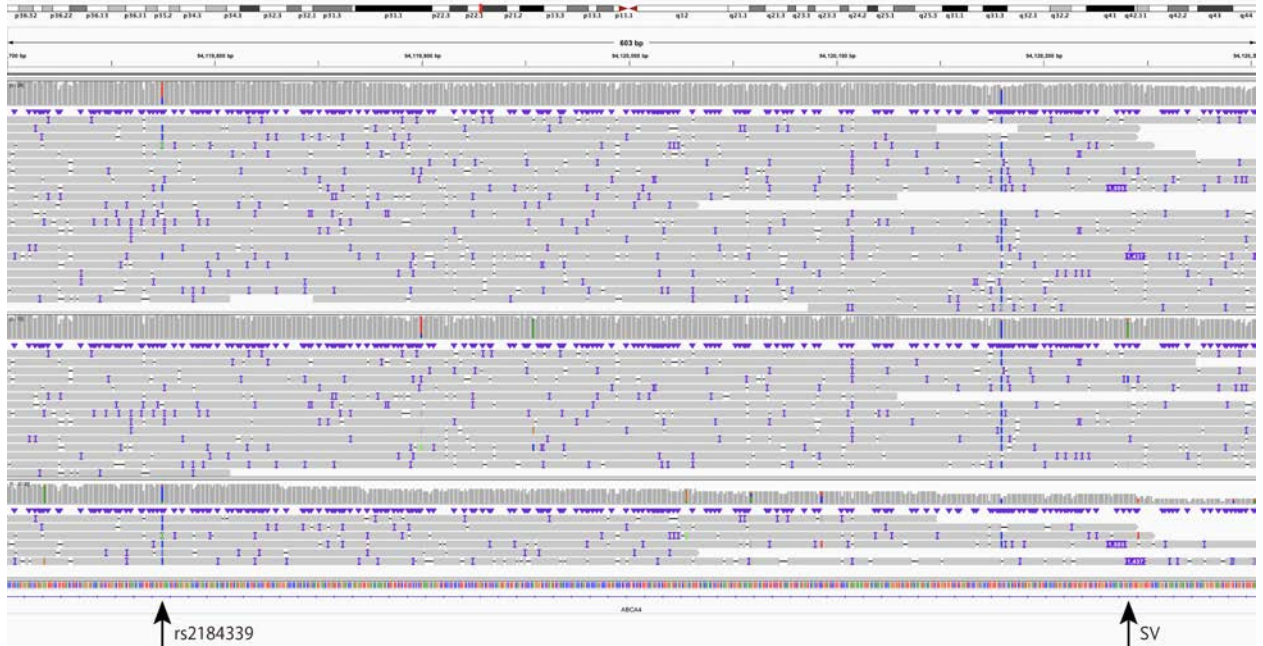

**E.** Phasing of long reads shows that rs2184339 (T>C) is present on reads with the 1,500 bp insertion. Most reads terminating at the insertion site are soft clipped. IGV view is of chr1:94,119,700-94,120,304.

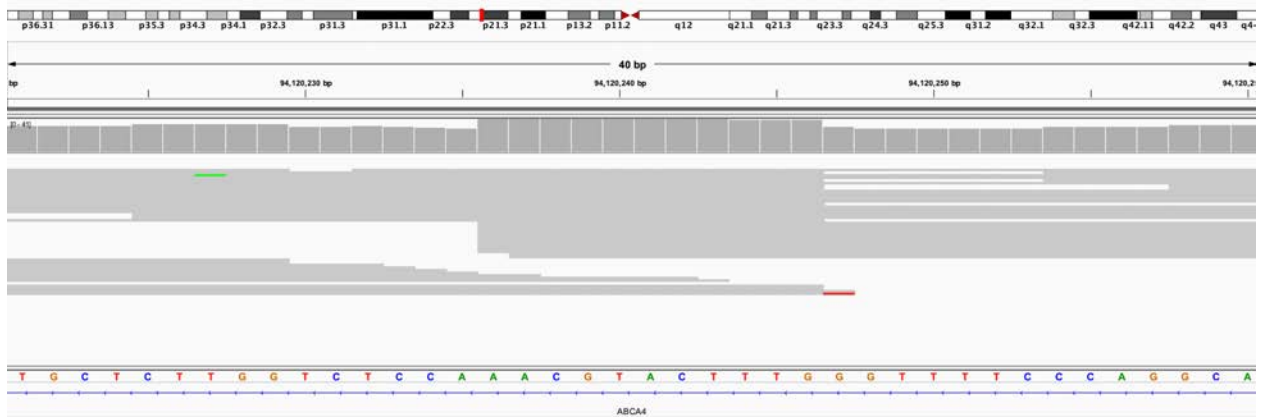

**F.** Analysis of short-read sequencing data reveals a 9 bp target site duplication at the position of the suspected insertion. IGV view is of chr1:94,120,221-94,120,260.

Figure S40. S047 (*AGL*), known single-nucleotide deletion, second hit is 1.5 kbp deletion.

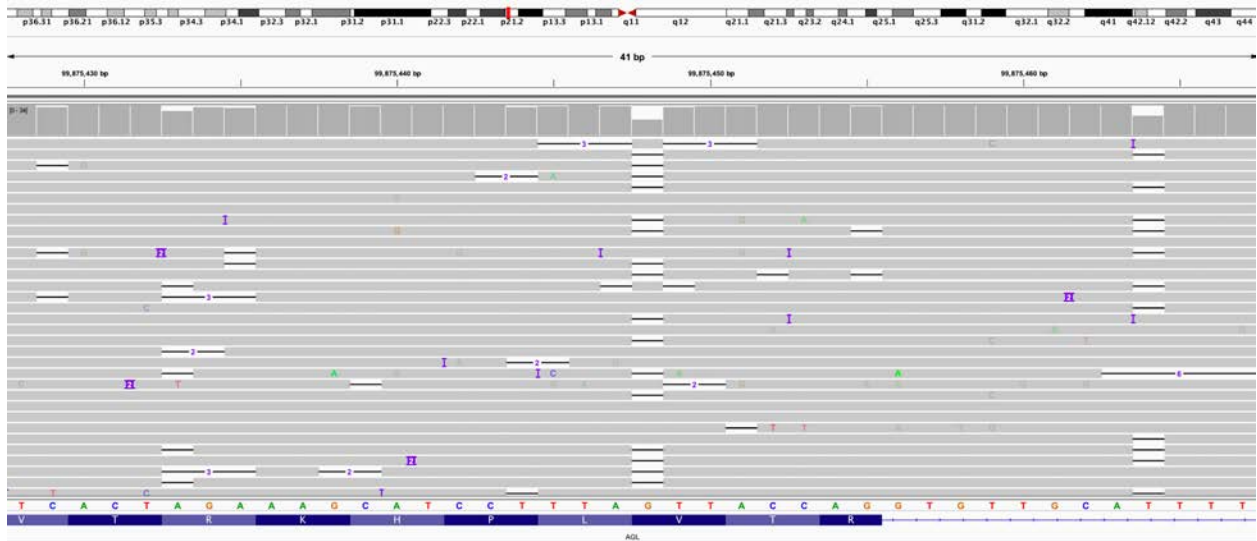

A. IGV screenshot of previously identified single-nucleotide deletion (view is chr1:99,875,428-99,875,467).

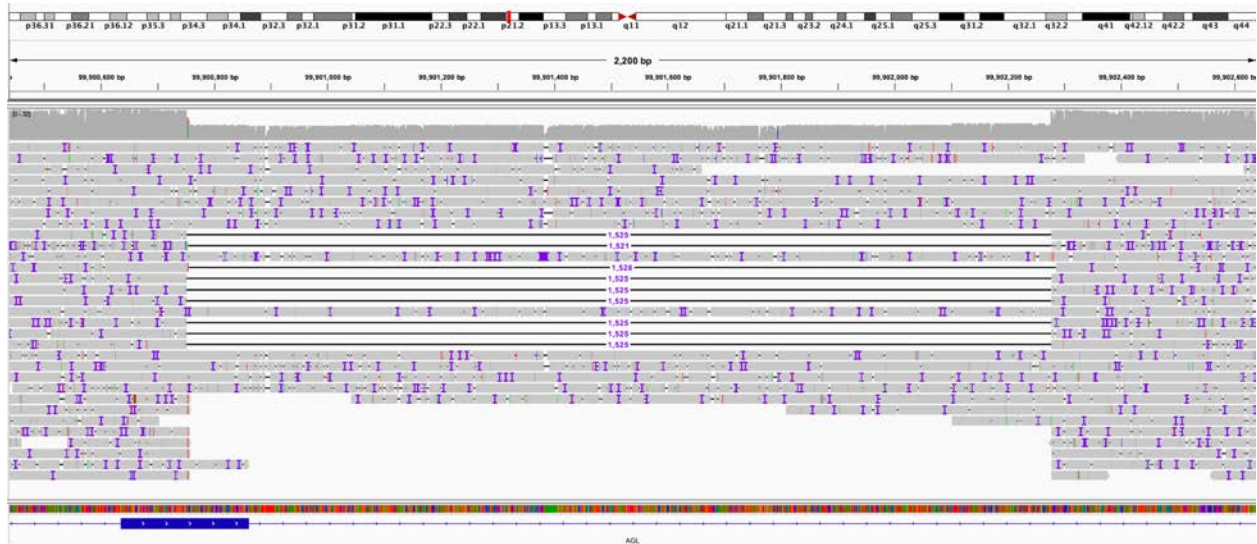

B. IGV screenshot of 1,525 bp deletion (coordinates are chr1:99,900,752-99,902,276) identified by Sniffles and SVIM (view is of chr1:99,900,438-99,902,636).

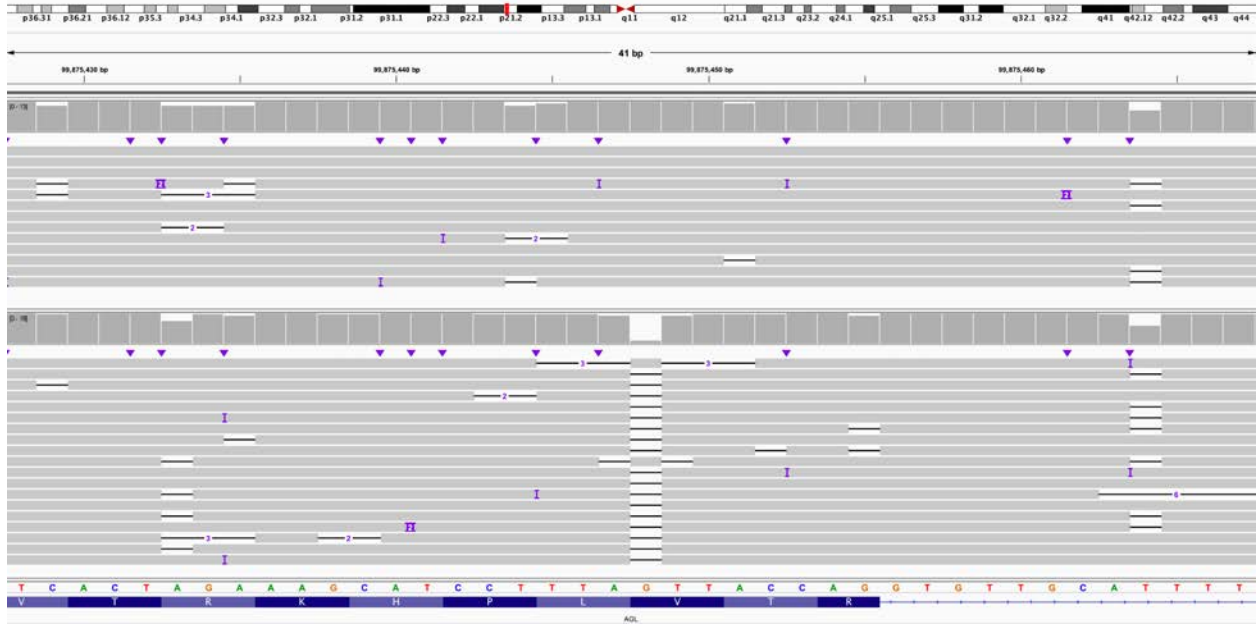

C. Longshot phased the reads into two haplotypes (HP1 and HP2) and suggests that the single-nucleotide deletion is on a different haplotype than the 1,525 bp deletion. IGV view is chr1:99,875,428-99,875,467.

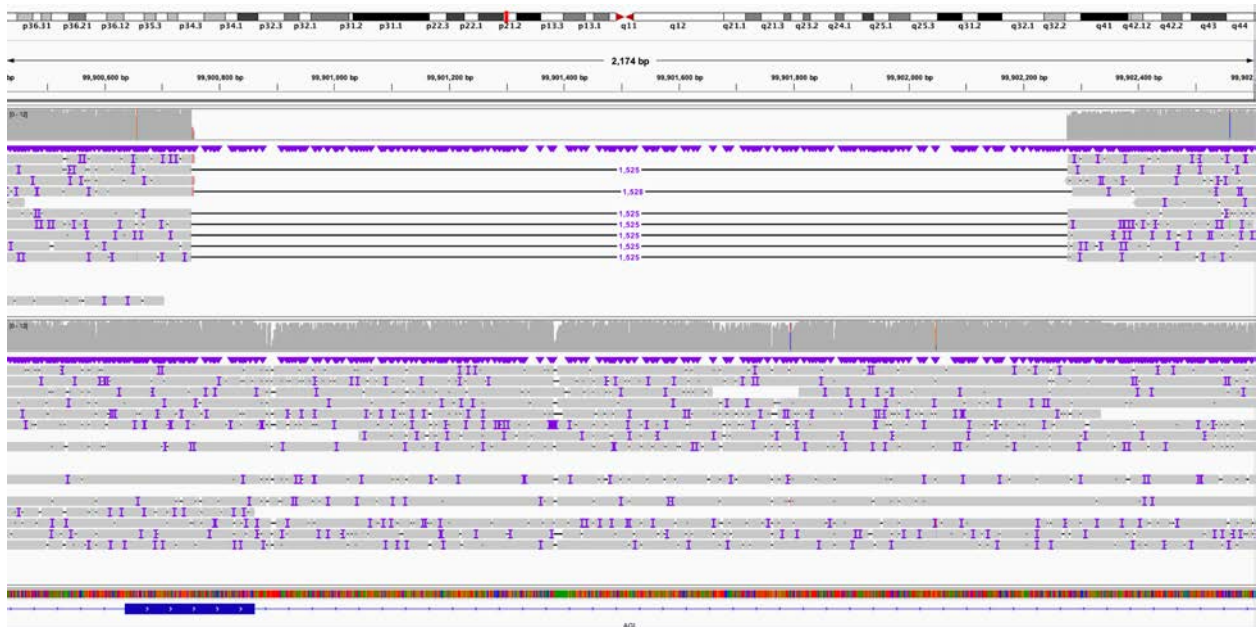

D. Longshot phased the reads into two haplotypes (HP1 and HP2) and suggests that the single-nucleotide deletion is on a different haplotype than the 1,525 bp deletion. IGV view is chr1:99,900,428-99,902,600.

Figure S41. S056 (*WDR19*), IGV views of inherited and splice variants identified by LRS.

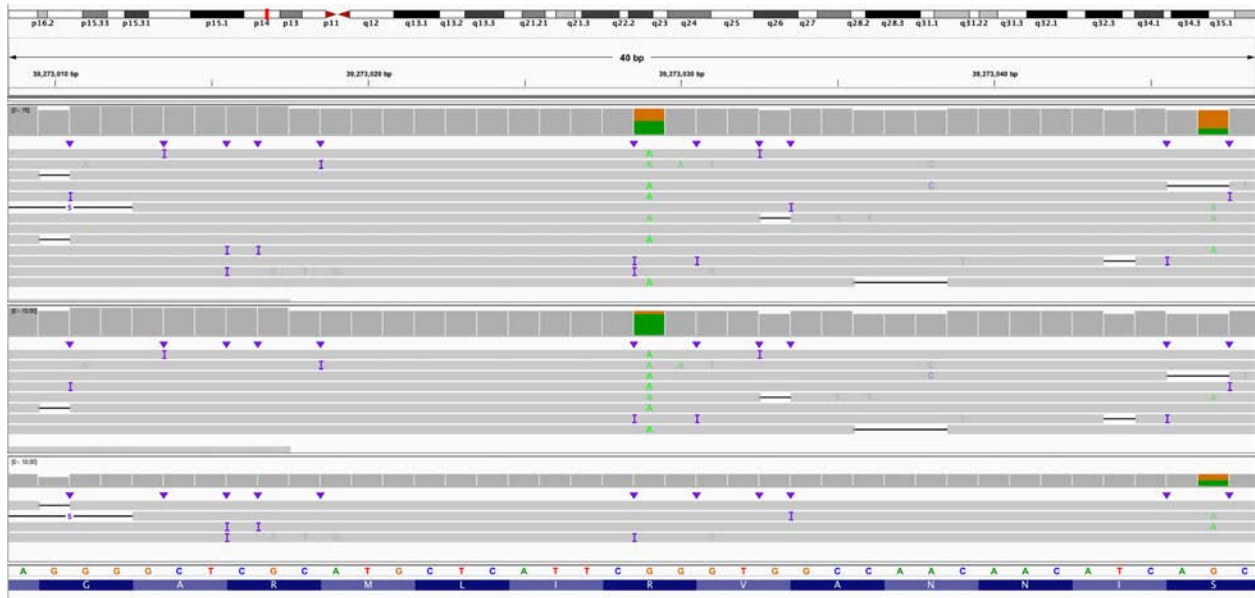

A. IGV view of known pathogenic inherited G>A. Top panel is all reads, middle panel is haplotype 1, and bottom panel is haplotype 2. IGV view is of chr4:39,273,009-39,273,048.

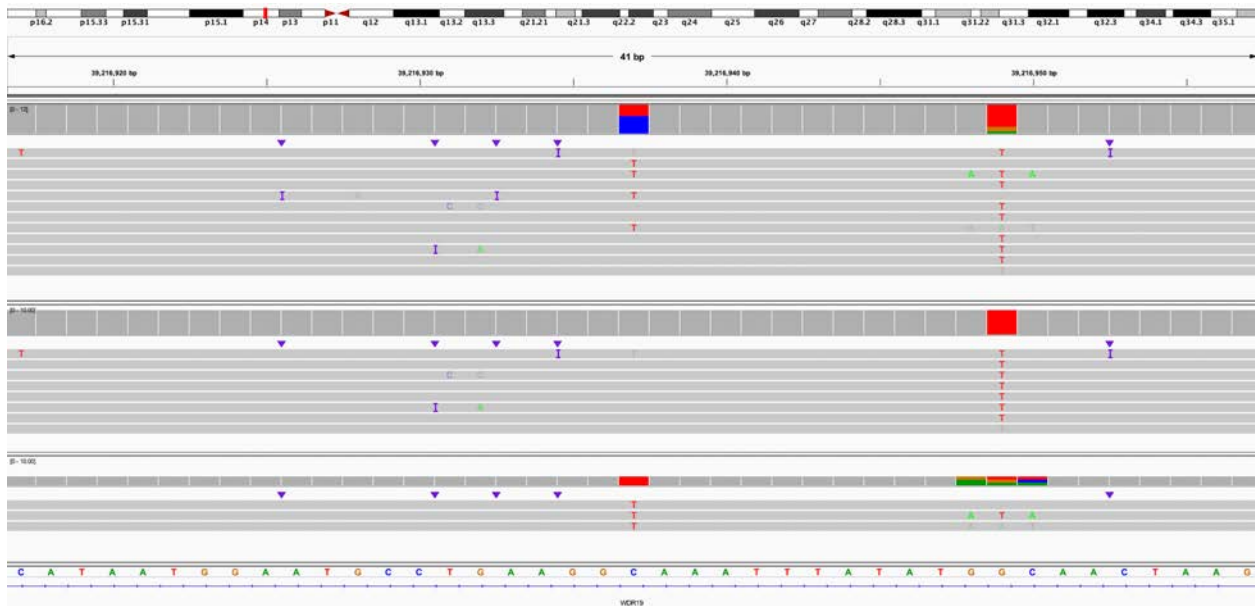

B. An intronic C>A variant in haplotype 2 is predicted to increase the likelihood this position acts as both a splice acceptor and donor. IGV view is of chr4:39,216,917-39,216,957.

## Supplementary Tables

**Table S1: Sample summary, DNA source, flow cells and libraries used per sample.**

| Type                  | Individual | DNA Source  | Flow cells used | Libraries used  | Summary of sample                                                                |
|-----------------------|------------|-------------|-----------------|-----------------|----------------------------------------------------------------------------------|
| Missing Variant (10)  | S002       | Blood       | 1               | 1               | Single variant in <i>ALMS1</i>                                                   |
|                       | S003       | Fibroblast  | 2               | 2               | Single variant in <i>NPHP4</i>                                                   |
|                       | S004       | Blood       | 3               | 3               | Single variant in <i>VARS2</i>                                                   |
|                       | S008       | Blood       | 2               | 3               | No variant in <i>HPRT1</i>                                                       |
|                       | S009       | Blood       | 3               | 4               | No variant in <i>DMD</i>                                                         |
|                       | S013       | Blood       | 1               | 2               | Single variant in <i>HPS1</i>                                                    |
|                       | S018       | Blood       | 1               | 1               | Single variant in <i>PAH</i>                                                     |
|                       | S025       | Blood       | 1               | 1               | Single variant in <i>ABCA4</i>                                                   |
|                       | S047       | Blood       | 1               | 1               | Single variant in <i>AGL</i>                                                     |
| Phasing (2)           | S056       | Blood       | 1               | 1               | Single variant in <i>WDR19</i>                                                   |
|                       | S071       | Blood       | 1               | 1               | Two variants in <i>METTL5</i>                                                    |
| Repeat Expansion (10) | S086       | Blood       | 2               | 2               | Two variants in <i>KIAA1109</i> , one mosaic                                     |
|                       | S011       | Saliva      | 1               | 1               | Expansions of both <i>ATXN3</i> and <i>ATXN8OS</i>                               |
|                       | S039       | Cell line   | 1               | 1               | Expansion of <i>FMR1</i>                                                         |
|                       | S040       | Cell line   | 1               | 1               | Expansion of <i>FXN</i>                                                          |
|                       | S041       | Cell line   | 1               | 1               | Expansion of <i>FXN</i>                                                          |
|                       | 04-01      | Blood       | 1               | 1               | Expansion and methylation of <i>XYLT1</i>                                        |
|                       | 06-01      | Saliva      | 2               | 2               | Expansion and methylation of <i>XYLT1</i>                                        |
|                       | 04-02      | Fibroblasts | 1               | 1               | Mother of 04-01                                                                  |
|                       | 04-03      | Saliva      | 1               | 1               | Father of 04-01                                                                  |
|                       | 06-02      | Saliva      | 1               | 1               | Mother of 06-01                                                                  |
| 06-03                 | Saliva     | 1           | 1               | Father of 06-01 |                                                                                  |
| SV Case - Complex (8) | S014       | Blood       | 1               | 1               | Three noncontiguous deletions of chr6                                            |
|                       | S020       | Blood       | 2               | 3               | Multiple deletions of chr4 and chr14, multiple translocations                    |
|                       | S021       | Blood       | 2               | 2               | Multiple mosaic deletions of chr8                                                |
|                       | S022       | Blood       | 1               | 1               | Amplification of 4q with adjacent region of homozygosity                         |
|                       | S035       | Blood       | 1               | 1               | Two duplications                                                                 |
|                       | S036       | Blood       | 2               | 2               | Four deletions on chr10, multiple translocations                                 |
|                       | S082       | Blood       | 1               | 1               | Deletion of chr10, duplication on chr17                                          |
|                       | S083       | Blood       | 1               | 1               | Deletion and duplication of chr4                                                 |
| SV Case - Simple (14) | BK144-03   | Blood       | 1               | 1               | 22q13.3 deletion                                                                 |
|                       | BK180-03   | Blood       | 1               | 1               | 15q11-q13 duplication                                                            |
|                       | BK294-03   | Blood       | 1               | 1               | 22q11.2 duplication                                                              |
|                       | BK364-03   | Blood       | 1               | 1               | 1p36.11 duplication                                                              |
|                       | BK397-101  | Blood       | 1               | 1               | 16p11.2 deletion                                                                 |
|                       | BK430-103  | Blood       | 1               | 1               | 16p11.2 duplication                                                              |
|                       | BK482-101  | Blood       | 1               | 1               | 1q21.1 duplication                                                               |
|                       | BK487-101  | Blood       | 1               | 1               | 1q21 deletion                                                                    |
|                       | BK506-03   | Blood       | 1               | 1               | 5p15.33 deletion                                                                 |
|                       | S016       | Blood       | 1               | 1               | Tandem duplication in <i>CTNND2</i>                                              |
|                       | S023       | Blood       | 1               | 1               | Mosaic ring 18                                                                   |
|                       | S046       | Blood       | 1               | 1               | Unbalanced translocation between chr4 and chr15                                  |
|                       | S060       | Blood       | 1               | 1               | Translocation between chr12 and chr17 in an individual with campomelic dysplasia |
|                       | S063       | Fibroblast  | 1               | 1               | Known SVA insertion in <i>BRCA1</i>                                              |

**Table S2: Per sample sequencing targets, coverage, and average read length.**

| Individual                                    | Target chr | Target start | Target end  | Size of target region (bp) | Target, gene, or target | Average coverage of whole genome (x) | Average coverage of target region (x) | Average length of all reads (bp) | Average length of reads in target region (bp) |
|-----------------------------------------------|------------|--------------|-------------|----------------------------|-------------------------|--------------------------------------|---------------------------------------|----------------------------------|-----------------------------------------------|
| <b>Simple SV cases</b>                        |            |              |             |                            |                         |                                      |                                       |                                  |                                               |
| BK144-03                                      | 22         | 17,500,000   | 50,818,000  | 33,318,000                 | 22q13.3 del             | 3.5                                  | 14.7                                  | 539                              | 2,133                                         |
| BK180-03                                      | 15         | 20,000,000   | 35,000,000  | 15,000,000                 | 15q11-q13 dup           | 3.6                                  | 61.5                                  | 524                              | 4,289                                         |
| BK294-03                                      | 22         | 17,500,000   | 50,818,000  | 33,318,000                 | 22q11.2 dup             | 3.5                                  | 33.7                                  | 524                              | 4,617                                         |
| BK364-03                                      | 1          | 24,000,000   | 30,000,000  | 6,000,000                  | 1p36.11 dup             | 2.0                                  | 21.2                                  | 427                              | 3,692                                         |
| BK397-101                                     | 16         | 26,500,000   | 35,300,000  | 8,800,000                  | 16p11.2 del             | 0.7                                  | 12.5                                  | 865                              | 6,230                                         |
| BK430-103                                     | 16         | 25,000,000   | 35,000,000  | 10,000,000                 | 16p11.2 dup             | 1.5                                  | 17.0                                  | 612                              | 4,057                                         |
| BK482-101                                     | 1          | 140,000,000  | 155,000,000 | 15,000,000                 | 1q21.1 dup              | 2.2                                  | 22.8                                  | 417                              | 2,258                                         |
| BK487-101                                     | 1          | 140,000,000  | 155,000,000 | 15,000,000                 | 1q21 del                | 1.6                                  | 36.9                                  | 515                              | 6,883                                         |
| BK506-03                                      | 5          | 1            | 8,000,000   | 7,999,999                  | 5p15.33 del             | 2.7                                  | 15.8                                  | 443                              | 3,814                                         |
| S016                                          | 5          | 11,026,788   | 12,124,078  | 1,097,290                  | CTNND2 dup              | 1.8                                  | 25.3                                  | 440                              | 4,626                                         |
| S023                                          | 18         | 1            | 5,000,000   | 4,999,999                  | 8p                      | 2.2                                  | 23.1                                  | 561                              | 5,106                                         |
|                                               | 18         | 45,000,000   | 80,373,285  | 35,373,285                 | 8q                      | 2.2                                  | 21.4                                  | 561                              | 5,947                                         |
| S046                                          | 4          | 180,000,000  | 190,214,555 | 10,214,555                 | translocation           | 2.0                                  | 9.8                                   | 436                              | 2,757                                         |
|                                               | 15         | 90,000,000   | 101,991,189 | 11,991,189                 | translocation           | 2.0                                  | 17.7                                  | 436                              | 3,068                                         |
| S060                                          | 12         | 45,000,000   | 65,000,000  | 20,000,000                 | translocation           | 2.0                                  | 27.2                                  | 579                              | 6,574                                         |
|                                               | 17         | 65,000,000   | 80,000,000  | 15,000,000                 | translocation           | 2.0                                  | 26.3                                  | 579                              | 6,801                                         |
| S063                                          | 17         | 42,000,000   | 44,000,000  | 2,000,000                  | SVA insertion           | 2.1                                  | 18.8                                  | 724                              | 5,925                                         |
| <b>Repeat expansion cases</b>                 |            |              |             |                            |                         |                                      |                                       |                                  |                                               |
| S011                                          | 14         | 92,041,011   | 92,101,011  | 60,000                     | ATXN3                   | 2.7                                  | 8.3                                   | 481                              | 1,099                                         |
|                                               | 13         | 70,109,384   | 70,169,384  | 60,000                     | ATXN8OS                 | 2.7                                  | 9.2                                   | 481                              | 1,197                                         |
| S039                                          | X          | 147,862,037  | 147,962,037 | 100,000                    | FMRI                    | 2.1                                  | 10.0                                  | 450                              | 3,772                                         |
| S040                                          | 9          | 69,007,285   | 69,067,285  | 60,000                     | FXN                     | 1.6                                  | 21.2                                  | 483                              | 5,649                                         |
| S041                                          | 9          | 69,007,285   | 69,067,285  | 60,000                     | FXN                     | 0.9                                  | 15.5                                  | 484                              | 8,134                                         |
| 04-01                                         | 16         | 16,500,000   | 18,000,000  | 1,500,000                  | XYLTI                   | 2.5                                  | 18.2                                  | 474                              | 5,170                                         |
| 06-01                                         | 16         | 16,500,000   | 18,000,000  | 1,500,000                  | XYLTI                   | 2.3                                  | 8.0                                   | 415                              | 2,121                                         |
| 04-02                                         | 16         | 16,500,000   | 18,000,000  | 1,500,000                  | XYLTI                   | 0.9                                  | 11.5                                  | 511                              | 5,815                                         |
| 04-03                                         | 16         | 16,500,000   | 18,000,000  | 1,500,000                  | XYLTI                   | 2.3                                  | 4.7                                   | 894                              | 2,308                                         |
| 06-02                                         | 16         | 16,500,000   | 18,000,000  | 1,500,000                  | XYLTI                   | 0.4                                  | 3.0                                   | 645                              | 3,276                                         |
| 06-03                                         | 16         | 16,500,000   | 18,000,000  | 1,500,000                  | XYLTI                   | 1.1                                  | 2.2                                   | 470                              | 2,036                                         |
| <b>Cases with complex copy number changes</b> |            |              |             |                            |                         |                                      |                                       |                                  |                                               |
| S014                                          | 6          | 150,000,000  | 165,000,000 | 15,000,000                 | -                       | 2.7                                  | 13.3                                  | 420                              | 2,105                                         |
| S020                                          | 2          | 1            | 36,300,000  | 36,299,999                 | 1st run                 | 1.9                                  | 16.3                                  | 872                              | 6,639                                         |
|                                               | 4          | 65,000,000   | 78,000,000  | 13,000,000                 | 1st run                 | 1.9                                  | 14.4                                  | 872                              | 6,556                                         |
|                                               | 10         | 59,474,150   | 80,320,091  | 20,845,941                 | 1st run                 | 1.9                                  | 16.3                                  | 872                              | 6,569                                         |
|                                               | 14         | 20,881,587   | 24,829,792  | 3,948,205                  | 1st run                 | 1.9                                  | 12.1                                  | 872                              | 6,549                                         |
|                                               | 10         | 41700000     | 59,475,000  | 17,775,000                 | 2nd run                 | 0.6                                  | 9.2                                   | 785                              | 7,158                                         |
|                                               | 4          | 51800000     | 65,000,000  | 13,200,000                 | 2nd run                 | 0.6                                  | 7.3                                   | 785                              | 8,057                                         |
|                                               | 4          | 78000000     | 100,000,000 | 22,000,000                 | 2nd run                 | 0.6                                  | 7.2                                   | 785                              | 8,072                                         |
|                                               | 14         | 25900000     | 50,000,000  | 24,100,000                 | 2nd run                 | 0.6                                  | 7.4                                   | 785                              | 8,239                                         |
| S021                                          | 8          | 1            | 145,138,636 | 145,138,635                | -                       | 4.9                                  | 34.7                                  | 642                              | 3,603                                         |
| S022                                          | 4          | 162611564    | 190000000   | 27,388,436                 | -                       | 2.0                                  | 31.2                                  | 634                              | 8,158                                         |
|                                               | 15         | 22,000,000   | 23,500,000  | 1,500,000                  | -                       | 2.0                                  | 31.8                                  | 634                              | 6,003                                         |
| S035                                          | 8          | 130,000,000  | 145,138,636 | 15,138,636                 | -                       | 2.7                                  | 38.7                                  | 538                              | 5,712                                         |
|                                               | 16         | 10,000,000   | 20,000,000  | 10,000,000                 | -                       | 2.7                                  | 38.5                                  | 538                              | 5,671                                         |
| S036                                          | 6          | 114,000,000  | 124,000,000 | 10,000,000                 | 1st run                 | 2.6                                  | 35.7                                  | 602                              | 6,443                                         |
|                                               | 18         | 7,000,000    | 16,000,000  | 9,000,000                  | 1st run                 | 2.6                                  | 34.9                                  | 602                              | 6,010                                         |
|                                               | 10         | 20,000,000   | 38,000,000  | 18,000,000                 | 1st run                 | 2.6                                  | 33.4                                  | 602                              | 6,487                                         |
|                                               | 10         | 50,000,000   | 60,000,000  | 10,000,000                 | 1st run                 | 2.6                                  | 32.4                                  | 602                              | 6,446                                         |
|                                               | 5          | 1            | 46,000,000  | 45,999,999                 | 2nd run                 | 0.7                                  | 7.8                                   | 828                              | 8,413                                         |
|                                               | 6          | 124,000,000  | 170,805,979 | 46,805,979                 | 2nd run                 | 0.7                                  | 7.6                                   | 828                              | 8,511                                         |
|                                               | 18         | 1            | 7,000,000   | 6,999,999                  | 2nd run                 | 0.7                                  | 7.8                                   | 828                              | 7,535                                         |
| S082                                          | 10         | 107,000,000  | 114,000,000 | 7,000,000                  | -                       | 1.7                                  | 9.3                                   | 663                              | 3,003                                         |
|                                               | 17         | 1            | 23,000,000  | 23,000,000                 | -                       | 1.7                                  | 10.3                                  | 663                              | 2,916                                         |
| S083                                          | 4          | 1            | 49,000,000  | 49,000,000                 | -                       | 2.2                                  | 34.3                                  | 628                              | 6,407                                         |
| <b>Phasing cases</b>                          |            |              |             |                            |                         |                                      |                                       |                                  |                                               |
| S071                                          | 2          | 169,780,000  | 169,850,000 | 70,000                     | METTL5                  | 0.7                                  | 9.6                                   | 487                              | 5,937                                         |
| S086                                          | 4          | 121,200,000  | 123,300,000 | 2,100,000                  | KIAA1109                | 2.8                                  | 29.4                                  | 480                              | 4,723                                         |

| Missing variant cases |    |             |             |           |              |     |      |       |       |
|-----------------------|----|-------------|-------------|-----------|--------------|-----|------|-------|-------|
| S002                  | 2  | 73,200,000  | 73,800,000  | 600,000   | <i>ALMS1</i> | 1.4 | 17.0 | 608   | 6,780 |
| S003                  | 1  | 5,762,810   | 6,092,425   | 329,615   | <i>NPHP4</i> | 2.9 | 21.6 | 792   | 6,232 |
| S004                  | 6  | 30814208    | 31026459    | 212,251   | <i>VAR2</i>  | 3.5 | 41.9 | 640   | 6,443 |
| S008                  | X  | 134,360,165 | 134,600,668 | 240,503   | <i>HPRT1</i> | 2.5 | 7.2  | 1,151 | 7,160 |
| S009                  | X  | 31,019,219  | 33,439,460  | 2,420,241 | <i>DMD</i>   | 6.9 | 29.5 | 501   | 3,344 |
| S013                  | 10 | 98,316,193  | 98,546,963  | 230,770   | <i>HPS1</i>  | 3.7 | 18.7 | 751   | 3,484 |
| S018                  | 12 | 102,736,889 | 103,058,441 | 321,552   | <i>PAH</i>   | 2.1 | 11.4 | 459   | 2,102 |
| S025                  | 1  | 93,000,000  | 95,000,000  | 2,000,000 | <i>ABCA4</i> | 3.2 | 23.1 | 574   | 3,392 |
| S047                  | 1  | 98,000,000  | 102,000,000 | 4,000,000 | <i>AGL</i>   | 1.6 | 23.5 | 491   | 5,753 |
| S056                  | 4  | 35,000,000  | 43,000,000  | 8,000,000 | <i>WDR19</i> | 1.4 | 22.1 | 537   | 8,282 |

**Table S3: Overview of individuals with a known single structural variant.**

| Individual | Previously known result                          | Confirmation of known result                                 | Additional information gained with T-LRS                                                                                                                                     | Previously reported event | Events seen by LRS                   |
|------------|--------------------------------------------------|--------------------------------------------------------------|------------------------------------------------------------------------------------------------------------------------------------------------------------------------------|---------------------------|--------------------------------------|
| BK144-03   | 22q13.3 deletion                                 | Identified the known deletion.                               | Identified exact position of deletion breakpoints.                                                                                                                           | 1 deletion                | 1 deletion                           |
| BK180-03   | 15q11-q13 duplication                            | Identified the known duplication.                            | None                                                                                                                                                                         | 1 duplication             | 1 duplication                        |
| BK294-03   | 22q11.2 duplication                              | Identified the known duplication.                            | None                                                                                                                                                                         | 1 duplication             | 1 duplication                        |
| BK364-03   | 1p36.11 duplication                              | Identified the known duplication.                            | Identified the exact position of the duplication breakpoints and found that the duplication is tandem.                                                                       | 1 duplication             | 1 duplication                        |
| BK397-101  | 16p11.2 deletion                                 | Identified the known deletion.                               | None                                                                                                                                                                         | 1 deletion                | 1 deletion                           |
| BK430-103  | 16p11.2 duplication                              | Identified the known duplication.                            | None                                                                                                                                                                         | 1 duplication             | 1 duplication                        |
| BK482-101  | 1q21.1 duplication                               | Identified the known duplication.                            | None                                                                                                                                                                         | 1 duplication             | 1 duplication                        |
| BK487-101  | 1q21 deletion                                    | Identified the known deletion.                               | None                                                                                                                                                                         | 1 deletion                | 1 deletion                           |
| BK506-03   | 5p15.33 deletion                                 | Identified the known deletion.                               | Appears to be an unbalanced translocation between chr5 and chr12. Short-read data from the individual agrees and the translocation is not found in parental short-read data. | 1 deletion                | Translocation between chr5 and chr12 |
| S016       | Tandem duplication in <i>CTNND2</i>              | Identified the known duplication and confirmed it is tandem. | None                                                                                                                                                                         | 1 duplication             | 1 duplication                        |
| S023       | Mosaic ring 18 in 40% of cells.                  | See decreased coverage in regions reported on the array.     | None.                                                                                                                                                                        | 2 mosaic deletions        | 2 mosaic deletions                   |
| S046       | Unbalanced translocation between chr4 and chr15. | Identified the translocation via coverage.                   | Identified exact position of translocation breakpoints.                                                                                                                      | Translocation             | Translocation                        |
| S060       | Translocation between chr12 and chr17            | Identified the translocation                                 | Exact position of translocation breakpoints                                                                                                                                  | Translocation             | Translocation                        |
| S063       | SVA insertion in <i>BRCA1</i>                    | Identified SVA insertion                                     | None, this served as a control                                                                                                                                               | SVA insertion             | SVA insertion                        |



**Table S4: Overview of individuals with repeat expansions, including expected and observed repeat expansion sizes.**

| Individual | Gene(s)        | Repeat | Previously reported repeat size                                        | Repeat position            | BP added to window for repeat assay | Number of reads spanning window | Average repeat lengths (% difference from expected if known) |
|------------|----------------|--------|------------------------------------------------------------------------|----------------------------|-------------------------------------|---------------------------------|--------------------------------------------------------------|
| S011       | <i>ATXN3</i>   | CAG    | Clinically reported as 74 and 28 repeats                               | chr14:92071012-92071052    | 100                                 | 10                              | 25 (11%), 77 (4%)                                            |
| S011       | <i>ATXN8OS</i> | CAG    | Clinically reported as 80 and 25 repeats                               | chr13:70139385-70139429    | 25                                  | 8                               | 15 (40%), 73 (9%)                                            |
| S039       | <i>FMR1</i>    | CGG    | Coriell sample 06897, reported as 477 repeats.                         | chrX:147911980-147912111   | 200                                 | 3                               | 386 (19%)                                                    |
| S040       | <i>FXN</i>     | GAA    | Coriell sample 16789, reported as 750 and 1000 repeats.                | chr9:69,037,285-69,037,302 | 50                                  | 4                               | 333 (56%), 1049 (5%)                                         |
| S041       | <i>FXN</i>     | GAA    | Coriell sample 15850, reported as 650 and 1030 repeats.                | chr9:69,037,285-69,037,302 | 50                                  | 9                               | 647 (1%), 958 (7%)                                           |
| 04-01      | <i>XYLT1</i>   | GGC    | Previously reported expansion.                                         | chr16:17470921-17470922    | 500                                 | 4                               | 758                                                          |
| 04-02      | <i>XYLT1</i>   | GGC    | Mother of 04-01, reported as one wild-type and one premutation allele. | chr16:17470921-17470922    | 50                                  | 16                              | 97, 221                                                      |
| 04-03      | <i>XYLT1</i>   | GGC    | Father of 04-01, reported as two wild-type alleles.                    | chr16:17470921-17470922    | 50                                  | 2                               | 71                                                           |
| 06-01      | <i>XYLT1</i>   | GGC    | Previously reported expansion.                                         | chr16:17470921-17470922    | 500                                 | 5                               | 224                                                          |
| 06-02      | <i>XYLT1</i>   | GGC    | Mother of 06-01, reported as one wild-type and one premutation allele  | chr16:17470921-17470922    | 50                                  | 1                               | 81                                                           |
| 06-03      | <i>XYLT1</i>   | GGC    | Father of 06-01, reported as two wild-type alleles                     | chr16:17470921-17470922    | 50                                  | 1                               | 78                                                           |

**Table S5: Per-read details of individuals with *ATXN3*, *ATXN8OS*, *FMR1*, and *FXN* repeat expansions.**

| Read ID                              | Repeat Length (bp) | Repeats (Estimate) | Repeat Group | Average Number of Repeats |
|--------------------------------------|--------------------|--------------------|--------------|---------------------------|
| <b>S011 - ATXN3</b>                  |                    |                    |              |                           |
| c4b0552d-118e-4d6b-9411-09b0861262fe | 55                 | 18                 | 1            | 25                        |
| 616cf7f8-a13f-429a-b0c5-825f1a15da3d | 72                 | 24                 | 1            |                           |
| e133bc59-4c37-4c5c-8ce9-b206180058eb | 77                 | 26                 | 1            |                           |
| eadb0392-728a-4437-8e5e-c2814638894f | 79                 | 26                 | 1            |                           |
| 2f107739-f4a6-40f0-b52b-252132f992f3 | 85                 | 28                 | 1            |                           |
| 137c7831-3cb4-4f7c-99b6-196a969702dc | 218                | 73                 | 2            | 77                        |
| 72ed9321-3c6b-4cab-b508-83d6efc1efc0 | 230                | 77                 | 2            |                           |
| b6a6b164-c767-4514-b723-4a6643a0f3f5 | 231                | 77                 | 2            |                           |
| e6c40588-04c8-4a17-b740-fc1990995267 | 232                | 77                 | 2            |                           |
| 0fa6df78-d10e-42f8-9e1e-6db5a907d858 | 250                | 83                 | 2            |                           |
| <b>S011 - ATXN8OS</b>                |                    |                    |              |                           |
| 9712bb2f-b1fb-40db-9e05-6f708b6443e4 | 41                 | 14                 | 1            | 15                        |
| 3e0a7cc1-ee7f-47ff-97f4-9516cbebb21e | 43                 | 14                 | 1            |                           |
| d5eea8a6-f1d5-459f-b865-bff3c35a26b3 | 44                 | 15                 | 1            |                           |
| c03fb6ab-a4a1-4518-b946-ad650f578e25 | 46                 | 15                 | 1            |                           |
| 70fec058-32ab-4270-aaa6-1984af7b1402 | 197                | 66                 | 2            | 73                        |
| 4f49b32d-139c-4beb-b831-9c4a5b7a19be | 206                | 69                 | 2            |                           |
| a7304699-9d25-4843-b587-cb84de848b84 | 226                | 75                 | 2            |                           |
| 489bde02-eae6-4270-a7db-1e488b61ccfd | 245                | 82                 | 2            |                           |
| <b>S039 - FMR1</b>                   |                    |                    |              |                           |
| 5fac5744-2c5c-4211-88c8-5b9ee3a20752 | 759                | 253                | 1            | 386                       |
| b215ab66-d863-46d3-878e-69d3d855a302 | 1448               | 483                | 1            |                           |
| ef287abe-e2a4-4b0e-8121-1de041a53f77 | 1268               | 423                | 1            |                           |
| <b>S040 - FXN</b>                    |                    |                    |              |                           |
| 44970178-6c34-48e8-afd9-f529d6bda0e2 | 985                | 328                | 1            | 333                       |
| 1e915a81-c955-4c88-8946-b3e73d371b64 | 1004               | 335                | 1            |                           |
| afddceb3-0802-404d-a61c-24ecd8a887db | 1007               | 336                | 1            |                           |
| a66018cb-a390-4cb6-89f4-b9c0073e68f8 | 3147               | 1049               | 2            | 1049                      |
| <b>S041 - FXN</b>                    |                    |                    |              |                           |
| a93466ef-353b-403d-a2ec-d5439867b826 | 1788               | 596                | 1            | 647                       |
| b1ac947d-e98d-41f4-b5ca-d464e3668388 | 1939               | 646                | 1            |                           |
| 8164bc3d-6cae-4928-a975-e695c48bc757 | 1963               | 654                | 1            |                           |
| 0bfda482-97a2-42c8-ad67-798cbf2bd5b8 | 2079               | 693                | 1            |                           |
| bff8f5f8-f878-4f38-ae5c-b7aa0009b8ae | 2415               | 805                | 2            | 958                       |
| 89100931-0b2b-4938-a882-f7c81652858a | 2895               | 965                | 2            |                           |
| 20ad64ba-a1b7-4371-93f8-e3c425c2c008 | 2996               | 999                | 2            |                           |
| d13da846-f4f3-45ba-806a-0f77f50bb71a | 3000               | 1000               | 2            |                           |
| c0a0f7ad-c30a-4e40-ab51-fe00b1ab699a | 3058               | 1019               | 2            |                           |

Table S6: Per-read details of *XYLT1* repeat expansions.

| Read ID                              | Repeat Length (bp) | Insert between <i>KpnI</i> cut sites (bp) | Repeats | Repeat Group | Average Number of Repeats |
|--------------------------------------|--------------------|-------------------------------------------|---------|--------------|---------------------------|
| <b>04-01 - XYLT1</b>                 |                    |                                           |         |              |                           |
| 71ed6a24-3280-465a-8114-338c0eb6308d | 1846               | 4435                                      | 615     | 1            | 758                       |
| c522d590-4165-47ac-9d4e-fb98f391bc13 | 2861               | 5450                                      | 954     | 1            |                           |
| beb4b5c7-293c-4f69-b275-d393c6a3ac34 | 1591               | 4180                                      | 530     | 1            |                           |
| a09207e2-a9cc-4cb6-9e12-f9fb56214399 | 2800               | 5389                                      | 933     | 1            |                           |
| <b>04-02 - XYLT1</b>                 |                    |                                           |         |              |                           |
| b2bebdb7-8e03-4b86-833f-445c1c2cd1d0 | 167                | 2756                                      | 56      | 1            | 97                        |
| 7c629eb4-81f6-4d27-988b-b827b81419a2 | 282                | 2871                                      | 94      | 1            |                           |
| 775ca9d2-16b7-43f2-8855-6ef25cfd26a0 | 283                | 2872                                      | 94      | 1            |                           |
| 0cce5876-2f35-44f8-835f-867f08e4e571 | 288                | 2877                                      | 96      | 1            |                           |
| 879d89f-3293-4bec-93ec-073c985c3a18  | 288                | 2877                                      | 96      | 1            |                           |
| 83d4020e-16f1-4b94-95d8-1bf48fca6de6 | 295                | 2884                                      | 98      | 1            |                           |
| 970f3e26-1807-42d3-b15e-4c85a25b6ab4 | 433                | 3022                                      | 144     | 1            | 221                       |
| 0edbaf14-3d7e-46a2-a03d-268c784560f3 | 603                | 3192                                      | 201     | 2            |                           |
| b09a91bf-ae4-4fc0-a7bf-51d7cb1ad126  | 615                | 3204                                      | 205     | 2            |                           |
| 40767c26-5d0c-467d-bdcf-c1a6346d4229 | 641                | 3230                                      | 214     | 2            |                           |
| f85efe4f-2d32-4a6d-a217-165c6dbdc661 | 645                | 3234                                      | 215     | 2            |                           |
| b0a508ce-069d-43ac-865e-7b7cd900eb70 | 653                | 3242                                      | 218     | 2            |                           |
| 5c6ac009-694d-4f86-9511-8708f952a81c | 688                | 3277                                      | 229     | 2            |                           |
| 4e315aca-60a8-4e61-8cd6-c08f129d701a | 693                | 3282                                      | 231     | 2            |                           |
| 227e44ce-2051-4169-9b25-17cfdb50a4c5 | 716                | 3305                                      | 239     | 2            |                           |
| 011e133a-ea64-43fd-a4f4-0c2cfc8fe56e | 725                | 3314                                      | 242     | 2            |                           |
| <b>04-03 - XYLT1</b>                 |                    |                                           |         |              |                           |
| bba6d56d-5293-4c5b-bd03-327dc12f7ece | 218                | 2807                                      | 73      | 1            | 71                        |
| 370138b9-090a-4fb0-80bc-01723888a41b | 209                | 2798                                      | 70      | 1            |                           |
| <b>06-01 - XYLT1</b>                 |                    |                                           |         |              |                           |
| c66d7ab6-2ec4-417d-9445-d1d68ef3cf8e | 668                | 3257                                      | 223     | 1            | 224                       |
| 7db4e75c-c2f7-4029-9c6e-a8e06ff269a6 | 720                | 3309                                      | 240     | 1            |                           |
| 210471f7-0e15-436e-862f-85557ad3d4ff | 734                | 3323                                      | 245     | 1            |                           |
| 8f3c0400-f5dc-47e2-bc69-611a477181bf | 622                | 3211                                      | 207     | 1            |                           |
| 5e39f080-90c9-4f3d-ba8b-bed01bef0caa | 616                | 3205                                      | 205     | 1            |                           |
| <b>06-02 - XYLT1</b>                 |                    |                                           |         |              |                           |
| 236a7c09-2c88-4ce8-b2b3-fda20bc625c1 | 243                | 2832                                      | 81      | 1            | 81                        |
| <b>06-03 - XYLT1</b>                 |                    |                                           |         |              |                           |
| 9e7e1ed4-ebc2-4b30-a8ea-4c561d87e793 | 235                | 2824                                      | 78      | 1            | 78                        |

**Table S7: Summary of individuals with complex SVs, including previously known events and new events identified by T-LRS.**

| Individual | Previously known result                                                                                                                                                                                                                            | Confirmation of known result                                                                                  | Additional information gained with T-LRS                                                                                                                                                                                                                                                                                          | Total previously known events | Total new events |
|------------|----------------------------------------------------------------------------------------------------------------------------------------------------------------------------------------------------------------------------------------------------|---------------------------------------------------------------------------------------------------------------|-----------------------------------------------------------------------------------------------------------------------------------------------------------------------------------------------------------------------------------------------------------------------------------------------------------------------------------|-------------------------------|------------------|
| S014       | Three noncontiguous deletions of chromosome 6.                                                                                                                                                                                                     | Identified the three deletions seen on array                                                                  | Identified two additional deletions and one rearrangement, and found no pathogenic or likely pathogenic variants in deleted regions.                                                                                                                                                                                              | 3                             | 3                |
| S020       | Two deletions of 4q and one of 14q identified on the array. Karyotype revealed translocation between chromosomes 2, 4, 10, and 14.                                                                                                                 | Identified the three deletions seen on array and several translocations between chromosomes 2, 4, 10, and 14. | Identified one additional deletion on chromosome 4 and two on chromosome 10. Found the exact position of all translocation breakpoints, revealing two that bisected genes with AD phenotypes. Identified additional rearrangement breakpoints within chromosome 10 and chromosome 14 not involved in a deletion or translocation. | 7                             | 22               |
| S021       | Terminal 3.2 Mbp loss of 8p23.3 to p23.2 with a copy state of 1. Adjacent interstitial 3.7 Mbp mosaic loss of 8p23.2 to p23.1 with a copy state between 1 and 2. Terminal 50 Mbp mosaic gain of 8q22.1 to q24.3 with a copy state between 2 and 3. | Confirmed mosaic loss and gain seen on array.                                                                 | Find that a common 400 kbp duplication on 8p not reported on the array appears to be inverted and attached to the chromosome 8 not carrying a deletion.                                                                                                                                                                           | 3                             | 1                |
| S022       | Focal amplification of 4q (copy state 4 or greater) with adjacent region of homozygosity and 15q11.2 duplication.                                                                                                                                  | See the amplification of 4q32, homozygosity of 4q, and duplication in 15q11.2.                                | Determined the structure of the tandem amplification on chr 4 and confirmed 5 copies of the amplification (6 with the wild-type chromosome). Do not see breakpoints of the 15q11.2 duplication, but do see the duplication. No methylation differences or pathogenic variants in the homozygous region.                           | 2                             | 0                |
| S035       | Duplications of 8q24 and 16p13.11                                                                                                                                                                                                                  | Both duplications observed.                                                                                   | Found that 8q duplication is tandem and identified exact breakpoints. Could not identify the exact position of the 16p13.11 duplication that is flanked by segmental duplications.                                                                                                                                                | 2                             | 0                |
| S036       | Four deletions on chr 10, karyotype found translocation between chr 18 and 6 and pericentric inversion of chr10.                                                                                                                                   | Identified four deletions and found the t(6;18).                                                              | Found additional translocations between chromosome 10 and chromosome 5 as well as additional rearrangements on chromosomes 6, 10, and 18.                                                                                                                                                                                         | 7                             | 13               |
| S082       | Single pathogenic deletion on chr 10. One complex likely pathogenic CNV on chr 17 with two deletions and three duplications.                                                                                                                       | Identified the deletion on chr 10. Identified the two deletions and three duplications on chr 17.             | Determined that the duplications are rearranged and inverted.                                                                                                                                                                                                                                                                     | 6                             | 2                |
| S083       | Deletion of distal arm of 4p, duplication of 4p proximal to the deletion.                                                                                                                                                                          | Identified the deletion and duplication.                                                                      | Determined the exact position of the deletion and duplication breakpoints.                                                                                                                                                                                                                                                        | 2                             | 0                |

**Table S8: Known and new events observed for individuals with known complex SVs.**

| Individual | Known    |             |               |               | Observed |             |               |               | New Events |             |               |               |
|------------|----------|-------------|---------------|---------------|----------|-------------|---------------|---------------|------------|-------------|---------------|---------------|
|            | Deletion | Duplication | Translocation | Rearrangement | Deletion | Duplication | Translocation | Rearrangement | Deletion   | Duplication | Translocation | Rearrangement |
| S014       | 3        | 0           | 0             | 0             | 5        | 0           | 0             | 1             | 2          | 0           | 0             | 1             |
| S020       | 3        | 0           | 4             | 0             | 5        | 0           | 11            | 13            | 2          | 0           | 7             | 13            |
| S021       | 2        | 1           | 0             | 0             | 2        | 1           | 0             | 1             | 0          | 0           | 0             | 1             |
| S022       | 0        | 2           | 0             | 0             | 0        | 2           | 0             | 0             | 0          | 0           | 0             | 0             |
| S035       | 0        | 2           | 0             | 0             | 0        | 2           | 0             | 0             | 0          | 0           | 0             | 0             |
| S036       | 4        | 0           | 2             | 1             | 6        | 0           | 8             | 6             | 2          | 0           | 6             | 5             |
| S082       | 3        | 3           | 0             | 0             | 3        | 3           | 0             | 0             | 0          | 0           | 0             | 2             |
| S083       | 1        | 1           | 0             | 0             | 1        | 1           | 0             | 0             | 0          | 0           | 0             | 0             |

**Table S9: Details of focal amplification of 4q in individual S022.**

| Region                       | Size (bp) | Copy number estimate | Coverage | Increase or decrease in coverage from prior |
|------------------------------|-----------|----------------------|----------|---------------------------------------------|
| chr4:160,000,000-160,143,267 | 143,267   | 2                    | 31.3     |                                             |
| chr4:160,143,268-160,165,900 | 22,632    | 3                    | 43.9     | 12.6                                        |
| chr4:160,165,901-160,248,169 | 82,268    | 4                    | 62.7     | 18.8                                        |
| chr4:160,248,170-160,450,953 | 202,783   | 5                    | 76.0     | 13.3                                        |
| chr4:160,450,954-162,685,228 | 2,234,274 | 6                    | 93.8     | 17.8                                        |
| chr4:162,685,229-162,689,149 | 3,920     | 4                    | 57.6     | -36.2                                       |
| chr4:162,689,150-162,700,000 | 110,850   | 2                    | 30.6     | -27.0                                       |

**Table S10: Rearrangement numbers and sizes for individual S014.**

| Chr | Segment | Start       | End         | Size (bp)   | Source/Type |
|-----|---------|-------------|-------------|-------------|-------------|
| 6   | A       | 1           | 153,854,905 | 153,854,904 | -           |
| 6   | B       | 153,854,906 | 154,095,842 | 240,936     | Deletion    |
| 6   | C       | 154,095,843 | 154,587,147 | 491,304     | Inversion   |
| 6   | D       | 154,587,148 | 154,588,799 | 1,651       | Deletion    |
| 6   | E       | 154,588,800 | 154,661,283 | 72,483      | -           |
| 6   | F       | 154,661,284 | 156,456,517 | 1,795,233   | Deletion    |
| 6   | G       | 156,456,518 | 156,460,113 | 3,595       | Inversion   |
| 6   | H       | 156,460,118 | 156,464,495 | 4,377       | -           |
| 6   | I       | 156,464,502 | 157,015,124 | 550,622     | -           |
| 6   | J       | 157,015,125 | 158,766,820 | 1,751,695   | Deletion    |
| 6   | K       | 158,766,821 | 164,500,069 | 5,733,248   | -           |
| 6   | L       | 164,500,070 | 164,654,921 | 154,851     | Deletion    |
| 6   | M       | 164,654,922 | 170,805,979 | 6,151,057   | -           |

**Table S11: Genes impacted by S014 breakpoints.**

| Chr | Breakpoint | Gene affected by breakpoint | Previously known based on clinical testing? | OMIM phenotype                              |
|-----|------------|-----------------------------|---------------------------------------------|---------------------------------------------|
| 6   | B/C        | <i>OPRM1</i>                | Y                                           | none                                        |
| 6   | I/J        | <i>ARID1B</i>               | Y                                           | Autosomal dominant: Coffin-Siris syndrome I |
| 6   | K/L        | <i>EZR</i>                  | Y                                           | none                                        |

**Table S12: Rearrangement numbers and sizes for individual S020.**

| Chr | Segment | Start      | End         | Size (bp)   | Source/Type   | Validated with HiFi? |
|-----|---------|------------|-------------|-------------|---------------|----------------------|
| 2   | A       | 1          | 7,777,990   | 7,777,989   | Derivative 14 | Yes                  |
| 2   | B       | 7,777,996  | 16,235,712  | 8,457,716   | Derivative 4  | Yes                  |
| 2   | C       | 16,235,711 | 242,193,529 | 225,957,818 | Derivative 2  | Yes                  |
| 4   | A       | 1          | 67,572,970  | 67,572,969  | Derivative 4  | Yes                  |
| 4   | B       | 67,572,971 | 70,140,499  | 2,567,528   | Deletion      | Yes                  |
| 4   | C       | 70,140,500 | 73,061,492  | 2,920,992   | Derivative 14 | Yes                  |
| 4   | D       | 73,061,493 | 73,129,559  | 68,066      | Deletion      | Yes                  |
| 4   | E       | 73,129,560 | 73,446,127  | 316,567     | Derivative 10 | Yes                  |
| 4   | F       | 73,446,129 | 73,771,830  | 325,701     | Derivative 10 | Yes                  |
| 4   | G       | 73,771,831 | 74,581,615  | 809,784     | Deletion      | Yes                  |
| 4   | H       | 74,581,616 | 74,794,351  | 212,735     | Derivative 14 | Yes                  |
| 4   | I       | 74,794,352 | 74,831,249  | 36,897      | Derivative 14 | Yes                  |
| 4   | J       | 74,831,250 | 75,039,118  | 207,868     | Derivative 4  | Yes                  |
| 4   | K       | 75,039,137 | 77,012,176  | 1,973,039   | Derivative 4  | Yes                  |
| 4   | L       | 77,012,175 | 79,626,721  | 2,614,546   | Derivative 14 | Yes                  |
| 4   | M       | 79,626,720 | 81,632,570  | 2,005,850   | Derivative 4  | Yes                  |
| 4   | N       | 81,632,570 | 190,214,555 | 108,581,985 | Derivative 2  | Yes                  |
| 10  | A       | 1          | 50,382,094  | 50,382,093  | Derivative 10 | Yes                  |
| 10  | B       | 50,382,092 | 50,563,505  | 181,413     | Derivative 10 | Yes                  |
| 10  | C       | 50,563,501 | 50,649,777  | 86,276      | Derivative 10 | Yes                  |
| 10  | D       | 50,694,777 | 51,260,021  | 565,244     | Derivative 10 | Yes                  |
| 10  | E       | 51,260,022 | 51,840,878  | 580,856     | Deletion      | Yes                  |
| 10  | F       | 51,840,879 | 53,548,486  | 1,707,607   | Derivative 10 | Yes                  |
| 10  | G       | 53,548,487 | 53,563,514  | 15,027      | Derivative 14 | Yes                  |
| 10  | H       | 53,563,515 | 53,584,434  | 20,919      | Deletion      | Yes                  |
| 10  | I       | 53,584,435 | 56,035,820  | 2,451,385   | Derivative 4  | Yes                  |
| 10  | J       | 56,035,823 | 65,519,829  | 9,484,006   | Derivative 4  | Yes                  |
| 10  | K       | 65,519,828 | 67,462,235  | 1,942,407   | Derivative 10 | Yes                  |
| 10  | L       | 67,462,259 | 74,772,273  | 7,310,014   | Derivative 10 | Yes                  |
| 10  | M       | 74,772,269 | 76,402,382  | 1,630,113   | Derivative 4  | Yes                  |
| 10  | N       | 76,402,383 | 133,797,422 | 57,395,039  | Derivative 4  | Yes                  |
| 14  | A       | 1          | 20,934,810  | 20,934,809  | Derivative 14 | Yes                  |
| 14  | B       | 20,934,811 | 22,881,931  | 1,947,120   | Deletion      | Yes                  |
| 14  | C       | 22,881,932 | 107,043,718 | 84,161,786  | Derivative 10 | Yes                  |
|     |         |            |             |             |               |                      |
|     |         |            | Total Size  | 334,539,803 | Derivative 2  |                      |
|     |         |            | Total Size  | 151,177,985 | Derivative 4  |                      |
|     |         |            | Total Size  | 146,979,108 | Derivative 10 |                      |
|     |         |            | Total Size  | 34,512,995  | Derivative 14 |                      |

**Table S13: Genes impacted by S020 breakpoints.**

| <b>Chr</b> | <b>Breakpoint</b> | <b>Gene affected by breakpoint</b> | <b>Previously known based on clinical testing?</b> | <b>OMIM phenotype</b>                                                                                              |
|------------|-------------------|------------------------------------|----------------------------------------------------|--------------------------------------------------------------------------------------------------------------------|
| 4          | A/B               | <i>STAP1</i>                       | Y                                                  | none                                                                                                               |
| 4          | B/C               | <i>CSNIS2BP</i>                    | N                                                  | none                                                                                                               |
| 4          | C/D               | <i>COX18</i>                       | N                                                  | none                                                                                                               |
| 4          | D/E               | <i>ANKRD17</i>                     | N                                                  | none                                                                                                               |
| 4          | E/F               | <i>AFP</i>                         | N                                                  | Autosomal dominant: hereditary persistence of alpha-fetoprotein; autosomal recessive: alpha-fetoprotein deficiency |
| 4          | H/I               | <i>BTC</i>                         | N                                                  | none                                                                                                               |
| 4          | J/K               | <i>PARM1</i>                       | N                                                  | none                                                                                                               |
| 4          | K/L               | <i>SEPTIN11</i>                    | N                                                  | none                                                                                                               |
| 10         | A/B, B/C          | <i>SGMS1</i>                       | N                                                  | none                                                                                                               |
| 10         | D/E, E/F          | <i>PRKG1</i>                       | N                                                  | Autosomal dominant: aortic aneurysm, familial thoracic                                                             |
| 10         | K/L               | <i>CTNNA3</i>                      | N                                                  | Autosomal dominant: arrhythmogenic right ventricular dysplasia, familial                                           |
| 10         | M/N               | <i>LRMDA</i>                       | N                                                  | Autosomal recessive: Albinism, oculocutaneous, type VII                                                            |

**Table S14: Rearrangement numbers and sizes for individual S036.**

| Chr | Segment | Start       | End          | Size (bp)   | Source/Type   |
|-----|---------|-------------|--------------|-------------|---------------|
| 5   | A       | 1           | 22,881,851   | 22,881,850  | Derivative 5  |
| 5   | B       | 22,881,853  | 28,650,540   | 5,768,687   | Derivative 5  |
| 5   | C       | 28,650,540  | 28,826,587   | 176,047     | Derivative 10 |
| 5   | D       | 28,826,592  | 181,538,259  | 152,711,667 | Derivative 5  |
| 6   | A       | 1           | 123,005,546  | 123,005,545 | Derivative 6  |
| 6   | B       | 123,005,550 | 124,505,324  | 1,499,774   | Derivative 18 |
| 6   | C       | 124,505,731 | 126,657,919  | 2,152,188   | Derivative 18 |
| 6   | D       | 126,657,920 | 126,680,039  | 22,119      | Deletion      |
| 6   | E       | 126,680,040 | 170,805,979  | 44,125,939  | Derivative 18 |
| 10  | A       | 1           | 24,286,112   | 24,286,111  | Derivative 10 |
| 10  | B       | 24,286,113  | 24,725,849   | 439,736     | Deletion      |
| 10  | C       | 24,725,850  | 25,278,388   | 552,538     | Derivative 5  |
| 10  | D       | 25,278,408  | 34,622,799   | 9,344,391   | Derivative 10 |
| 10  | E       | 34,622,800  | 35,972,590   | 1,349,790   | Deletion      |
| 10  | F       | 35,972,591  | 49,775,899   | 13,803,308  | Derivative 10 |
| 10  | G       | 49,775,901  | 54,672,866   | 4,896,965   | Derivative 5  |
| 10  | H       | 54,672,867  | 55,305,313   | 632,446     | Deletion      |
| 10  | I       | 55,305,314  | 55,632,879   | 327,565     | Derivative 5  |
| 10  | J       | 55,632,880  | 56,736,281   | 1,103,401   | Deletion      |
| 10  | K       | 56,736,282  | 133,797,422  | 77,061,140  | Derivative 10 |
| 18  | A       | 1           | 6,275,133    | 6,275,132   | Derivative 6  |
| 18  | B       | 6,275,134   | 6,280,055    | 4,921       | Deletion      |
| 18  | C       | 6,280,056   | 7,279,970    | 999,914     | Derivative 6  |
| 18  | D       | 7,279,968   | 80,373,285   | 73,093,317  | Derivative 18 |
|     |         |             |              |             |               |
|     |         |             | Total Length | 187,139,272 | Derivative 5  |
|     |         |             | Total Length | 130,280,591 | Derivative 6  |
|     |         |             | Total Length | 124,670,997 | Derivative 10 |
|     |         |             | Total Length | 120,871,218 | Derivative 18 |

**Table S15: Genes impacted by S036 breakpoints.**

| Chr | Breakpoint    | Gene affected by breakpoint | Previously known based on clinical testing? | OMIM phenotype                                                                |
|-----|---------------|-----------------------------|---------------------------------------------|-------------------------------------------------------------------------------|
| 6   | A/B           | <i>CLVS2</i>                | N                                           | none                                                                          |
| 6   | B/C           | <i>NKAIN2</i>               | N                                           | none                                                                          |
| 10  | A/B           | <i>KIAA1217</i>             | N                                           | none                                                                          |
| 10  | C/D           | <i>GPR158</i>               | N                                           | none                                                                          |
| 10  | D/E           | <i>PARD3</i>                | Y                                           | none                                                                          |
| 10  | F/G, G/H, H/I | <i>PCDH15</i>               | Y                                           | Autosomal dominant and autosomal recessive: Usher syndrome, type 1D/F digenic |
| 18  | A/B, C/D      | <i>L3MBTL4</i>              | N                                           | none                                                                          |



**Table S16: Summary of individuals with missing variants.**

| Individual | Clinical workup                                                                                                                                                                                                            | Confirmation of inherited variant                                                  | Variant found by T-LRS                                                   | Confirmation or supporting findings                          |
|------------|----------------------------------------------------------------------------------------------------------------------------------------------------------------------------------------------------------------------------|------------------------------------------------------------------------------------|--------------------------------------------------------------------------|--------------------------------------------------------------|
| S002       | CMA normal, exome with paternally inherited stop in <i>ALMS1</i> , consistent with suspected diagnosis of Alström syndrome. Deletion/duplication analysis of <i>ALMS1</i> negative.                                        | Confirmed the known paternally inherited variant.                                  | <i>Alu</i> insertion in exon 20                                          | Clinically confirmed                                         |
| S003       | CMA normal, exome with paternally inherited stop in <i>NPHP4</i> , consistent with suspected diagnosis of NPH. Deletion/duplication analysis of <i>NPHP4</i> negative.                                                     | Confirmed the known paternally inherited variant.                                  | Intronic splice variant                                                  | Confirmed by qPCR                                            |
| S004       | CMA normal, exome identified single paternally inherited pathogenic variant in <i>VARS2</i> , deletion/duplication analysis of <i>VARS2</i> negative.                                                                      | Confirmed the known paternally inherited pathogenic p.A420T.                       | No second hit found.                                                     | n/a                                                          |
| S008       | Biochemical diagnosis of Lesch-Nyhan based on enzyme analysis. CMA normal, sequencing and deletion/duplication analysis of <i>HPRT1</i> negative.                                                                          | No pathogenic SNVs or copy number changes observed, consistent w/clinical testing. | Identified an inversion within <i>HPRT1</i> and confirmed with PCR.      | Clinically confirmed                                         |
| S009       | Suspected diagnosis of Duchenne muscular dystrophy. Sequencing and deletion/duplication analysis of <i>DMD</i> negative. Muscle biopsy consistent with diagnosis. The proband's maternal uncle died of muscular dystrophy. | No pathogenic SNVs or copy number changes observed, consistent w/clinical testing. | Identified a candidate AGAA repeat expansion in intron 16.               | Mom is heterozygous, unaffected brother has wild-type allele |
| S013       | CMA normal, exome with paternally inherited stop in <i>HPS1</i> , consistent with suspected diagnosis of Hermansky-Pudlak syndrome. No deletion/duplication analysis done.                                                 | Confirmed the known paternally inherited variant.                                  | Identified 1,900 bp deletion that removes exon 3.                        | Clinically confirmed with exon-level array                   |
| S018       | Elevated phenylalanine, exome with single pathogenic variant in <i>PAH</i> .                                                                                                                                               | Confirmed the known inherited variant.                                             | No second hit found.                                                     | No second hit found with short-read sequencing               |
| S025       | Diagnosed with Stargardt disease by clinical retinal exam. Exome with single pathogenic variant in <i>ABCA4</i> . No second hit seen on research WGS.                                                                      | Confirmed the known pathogenic variant.                                            | ~1,500 bp transposable element insertion in the first intron.            | Insertion is present in Illumina short-read data.            |
| S047       | Diagnosed with glycogen storage disease III. Exome revealed single-nucleotide deletion resulting in frameshift. Research SR-WGS was negative.                                                                              | Confirmed the known pathogenic variant.                                            | 1,525 bp deletion that removed part of exon 3 and results in frameshift. | Deletion present in Illumina SR-WGS data.                    |
| S056       | CMA normal, exome with single pathogenic variant in <i>WDR19</i> , consistent with presumed diagnosis of Sensenbrenner syndrome. Deletion/duplication analysis negative.                                                   | Confirmed the known inherited variant.                                             | Intronic splice variant                                                  | None                                                         |



**Table S18: Predicted strength of the canonical splice donor site at the Exon 1–Intron 1 boundary of *ABCA4* (NM\_000350) and alternative sites introduced by the ~1,500 bp insertion in individual S025.**

| Splice donor    | SpliceSiteFinder-like | MaxEntScan | NNSPLICE | GeneSplicer | Human Splice Finder |
|-----------------|-----------------------|------------|----------|-------------|---------------------|
| Canonical       | 81.70                 | 8.90       | 1.00     | 5.20        | 84.70               |
| Alternative     | 90.10                 | 8.00       | 0.90     | -           | 95.00               |
| Alternative     | 81.50                 | 7.20       | 0.80     | 0.60        | 90.80               |
| Splice acceptor | SpliceSiteFinder-like | MaxEntScan | NNSPLICE | GeneSplicer | Human Splice Finder |
| Canonical       | 95.25                 | 10.87      | 0.99     | 12.03       | 92.11               |
| Alternative     | 93.50                 | 10.00      | 1.00     | 3.20        | 90.60               |
| Alternative     | 88.54                 | 7.30       | 1.00     | 1.50        | 79.83               |
| Alternative     | 77.80                 | 6.10       | 0.60     | 2.30        | 78.50               |
| Alternative     | 83.20                 | 5.90       | 0.70     | -           | 85.80               |
| Alternative     | 71.70                 | 5.70       | -        | 1.60        | 79.50               |
| Alternative     | 74.60                 | 6.90       | 0.60     | -           | 78.30               |

While the SV is absent from all accessible population genetic databases (gnomAD, BRAVO), assessment by multiple *in silico* prediction tools suggest a strong likelihood of pathogenicity. Specifically, the deep residual neural network SpliceAI predicts a splice-altering consequence of the pre-mRNA through the introduction of a *de novo* donor site by the insertion event ( $\Delta$  score = 0.33, high recall). The ~1,500 bp insertion sequence itself contains two strong alternative splice donors and six alternative splice acceptors. The relative strength of these alternative donors and acceptors indicates a high probability of competition with canonical sites. One alternative donor site in particular exhibits a stronger splice signal than the canonical donor site at the Exon 1–Intron 1 boundary is the most probable site of alternative splicing leading to the inclusion of the 5' portion of the intron in the final mRNA transcript. Length of color bars (blue = donor, green = acceptor) are proportioned to the respective scales of each algorithm: SpliceSiteFinder-Like (0-100), MaxEntScan (0-16), NNSPLICE (0-1), Gene Splicer (0-15), Human Splice Finder v.3.1 (0-100).

**Table S19: Accession numbers or contact information for original sequencing data.**

| <b>Individual</b> | <b>Data Accession or ID</b> | <b>Contact</b>                                                                                                | <b>Email</b>                       |
|-------------------|-----------------------------|---------------------------------------------------------------------------------------------------------------|------------------------------------|
| S002              | phs000693                   | Danny E. Miller, MD, PhD                                                                                      | danny.miller@seattlechildrens.org  |
| S003              | phs000693                   | Danny E. Miller, MD, PhD                                                                                      | danny.miller @seattlechildrens.org |
| S004              | phs000693                   | Danny E. Miller, MD, PhD                                                                                      | danny.miller@seattlechildrens.org  |
| S008              | phs000693                   | Danny E. Miller, MD, PhD                                                                                      | danny.miller@seattlechildrens.org  |
| S009              | phs000693                   | Danny E. Miller, MD, PhD                                                                                      | danny.miller@seattlechildrens.org  |
| S011              | phs000693                   | Danny E. Miller, MD, PhD                                                                                      | danny.miller@seattlechildrens.org  |
| S013              | phs000693                   | Danny E. Miller, MD, PhD                                                                                      | danny.miller@seattlechildrens.org  |
| S014              | phs000693                   | Danny E. Miller, MD, PhD                                                                                      | danny.miller@seattlechildrens.org  |
| S016              | phs000693                   | Danny E. Miller, MD, PhD                                                                                      | danny.miller@seattlechildrens.org  |
| S018              | phs000693                   | Danny E. Miller, MD, PhD                                                                                      | danny.miller@seattlechildrens.org  |
| S020              | phs000693                   | Danny E. Miller, MD, PhD                                                                                      | danny.miller@seattlechildrens.org  |
| S021              | phs000693                   | Danny E. Miller, MD, PhD                                                                                      | danny.miller@seattlechildrens.org  |
| S022              | phs000693                   | Danny E. Miller, MD, PhD                                                                                      | danny.miller@seattlechildrens.org  |
| S023              | phs000693                   | Danny E. Miller, MD, PhD                                                                                      | danny.miller@seattlechildrens.org  |
| S025              | TBD                         | Danny E. Miller, MD, PhD                                                                                      | danny.miller@seattlechildrens.org  |
| S035              | phs000693                   | Danny E. Miller, MD, PhD                                                                                      | danny.miller@seattlechildrens.org  |
| S036              | phs000693                   | Danny E. Miller, MD, PhD                                                                                      | danny.miller@seattlechildrens.org  |
| S039              | phs000693                   | Danny E. Miller, MD, PhD                                                                                      | danny.miller@seattlechildrens.org  |
| S040              | phs000693                   | Danny E. Miller, MD, PhD                                                                                      | danny.miller@seattlechildrens.org  |
| S041              | phs000693                   | Danny E. Miller, MD, PhD                                                                                      | danny.miller@seattlechildrens.org  |
| S046              | phs000693                   | Danny E. Miller, MD, PhD                                                                                      | danny.miller@seattlechildrens.org  |
| S047              | TBD                         | Priya Kishnani, MD                                                                                            | priya.kishnani@duke.edu            |
| S056              | phs000693                   | Danny E. Miller, MD, PhD                                                                                      | danny.miller @seattlechildrens.org |
| S060              | phs000693                   | Danny E. Miller, MD, PhD                                                                                      | danny.miller@seattlechildrens.org  |
| S063              |                             | <a href="http://dx.doi.org/10.1136/jmedgenet-2020-107320">http://dx.doi.org/10.1136/jmedgenet-2020-107320</a> |                                    |
| S071              | phs000693                   | Danny E. Miller, MD, PhD                                                                                      | danny.miller@seattlechildrens.org  |
| S082              | phs000693                   | Danny E. Miller, MD, PhD                                                                                      | danny.miller@seattlechildrens.org  |
| S083              | phs000693                   | Danny E. Miller, MD, PhD                                                                                      | danny.miller@seattlechildrens.org  |
| S086              | phs000693                   | Danny E. Miller, MD, PhD                                                                                      | danny.miller@seattlechildrens.org  |
| 04-01             | TBD                         | Heather Mefford, MD, PhD                                                                                      | heather.mefford@stjude.org         |
| 04-02             | TBD                         | Heather Mefford, MD, PhD                                                                                      | heather.mefford@stjude.org         |
| 04-03             | TBD                         | Heather Mefford, MD, PhD                                                                                      | heather.mefford@stjude.org         |
| 06-01             | TBD                         | Heather Mefford, MD, PhD                                                                                      | heather.mefford@stjude.org         |
| 06-02             | TBD                         | Heather Mefford, MD, PhD                                                                                      | heather.mefford@stjude.org         |
| 06-03             | TBD                         | Heather Mefford, MD, PhD                                                                                      | heather.mefford@stjude.org         |
| BK144-03          | phs000693                   | Danny E. Miller, MD, PhD                                                                                      | danny.miller@seattlechildrens.org  |
| BK180-03          | phs000693                   | Danny E. Miller, MD, PhD                                                                                      | danny.miller@seattlechildrens.org  |
| BK294-03          | phs000693                   | Danny E. Miller, MD, PhD                                                                                      | danny.miller@seattlechildrens.org  |
| BK364-03          | phs000693                   | Danny E. Miller, MD, PhD                                                                                      | danny.miller@seattlechildrens.org  |
| BK397-101         | phs000693                   | Danny E. Miller, MD, PhD                                                                                      | danny.miller@seattlechildrens.org  |
| BK430-103         | phs000693                   | Danny E. Miller, MD, PhD                                                                                      | danny.miller@seattlechildrens.org  |
| BK482-101         | phs000693                   | Danny E. Miller, MD, PhD                                                                                      | danny.miller@seattlechildrens.org  |
| BK487-101         | phs000693                   | Danny E. Miller, MD, PhD                                                                                      | danny.miller@seattlechildrens.org  |
| BK506-03          | phs000693                   | Danny E. Miller, MD, PhD                                                                                      | danny.miller@seattlechildrens.org  |

## Supplemental References

1. Miller, D.E., Squire, A., and Bennett, J.T. (2019). A child with autism, behavioral issues, and dysmorphic features found to have a tandem duplication within CTNND2 by mate-pair sequencing. *Am J Med Genet A*.
2. Walsh, T., Casadei, S., Munson, K.M., Eng, M., Mandell, J.B., Gulsuner, S., and King, M.-C. (2020). CRISPR–Cas9/long-read sequencing approach to identify cryptic mutations in BRCA1 and other tumour suppressor genes. *J Med Genet* [jmedgenet-2020-107320](https://doi.org/10.1093/jmedgenet/2020-107320).
3. LaCroix, A.J., Stabley, D., Sahraoui, R., Adam, M.P., Mehaffey, M., Kernan, K., Myers, C.T., Fagerstrom, C., Anadiotis, G., Akkari, Y.M., et al. (2019). GGC Repeat Expansion and Exon 1 Methylation of XYLT1 Is a Common Pathogenic Variant in Baratela-Scott Syndrome. *Am J Hum Genetics* *104*, 35–44.
4. Sulovari, A., Li, R., Audano, P.A., Porubsky, D., Vollger, M.R., Logsdon, G.A., Consortium, H.G.S.V., Warren, W.C., Pollen, A.A., Chaisson, M.J.P., et al. (2019). Human-specific tandem repeat expansion and differential gene expression during primate evolution. *Proc National Acad Sci* *116*, 201912175.
5. Guo, H., Duyzend, M.H., Coe, B.P., Baker, C., Hoekzema, K., Gerds, J., Turner, T.N., Zody, M.C., Beighley, J.S., Murali, S.C., et al. (2019). Genome sequencing identifies multiple deleterious variants in autism patients with more severe phenotypes. *Genet Med* *21*, 1611–1620.
